# Supplementary material for: Evolutionary and functional analyses reveal a role for the RHIM in tuning RIPK3 activity across vertebrates
Source: eLife. 2025 May 28;13:RP102301. doi: 10.7554/eLife.102301 (PMC12119088; doi:10.7554/eLife.102301)
Supplement: Figure 1—figure supplement 1—source data 1. [file elife-102301-fig1-figsupp1-data1.xlsx]

## Sheet: 1A
Luciferase only	RIPK1	RIPK2	RIPK3	RIPK4	RIPK5	TNFα
0.751409	47.456	104.679	5.62888	40.7685	0.836684	3.428
0.822141	49.707	93.9662	5.48866	63.328	0.740728	2.73361
0.984159	58.6545	145.104	7.97351	100.395	1.07288	3.79366
1.12123	49.8959	143.901	9.92601	71.5036	1.24934	4.62867
1.16038	64.3087	181.808	7.70372	56.096	0.836886	6.25145
1.16068	64.995	151.004	6.50125	55.7882	0.723249	7.08736

## Sheet: 1B
	WT				Kinase mutant
RIPK1	84.0315	98.801	106.096	101.826	313.309	292.266	171.93	183.608
RIPK2	224.629	183.686	551.399	386.077	258.286	371.166	228.028	250.763
RIPK3	9.07724	6.63473	7.90818	10.1508	6.21991	8.39683	7.59835	7.29491
RIPK4	166.753	177.298	149.586	113.349	1.36032	1.32575	1.14502	0.887862
RIPK5	1.00044	0.670988	0.781168	0.812355	0.737561	0.721545	0.911803

## Sheet: 1C
	WT				RIPK1 KO
RIPK1	41.4746	46.1596	54.3867	48.5416	40.7402	70.9496	71.3513	75.9807
RIPK2	187.969	346.099	240.774	172.669	79.8353	76.9777	60.4232	121.501
RIPK3	4.68989	5.6024	6.42741	6.03959	1.58388	1.62787	1.9215	2.07667
RIPK4	57.5662	87.3808	72.1767	91.0969	62.8608	51.9904	63.1946	98.5235
RIPK5	0.313801	0.839159	1.05927	1.02899	0.66113	0.931689	1.28406	1.3345
