# Supplementary material for: Evolutionary and functional analyses reveal a role for the RHIM in tuning RIPK3 activity across vertebrates
Source: eLife. 2025 May 28;13:RP102301. doi: 10.7554/eLife.102301 (PMC12119088; doi:10.7554/eLife.102301)
Supplement: Figure 2—figure supplement 2—source data 1. [file elife-102301-fig2-figsupp2-data1.xlsx]

## Sheet: Sheet1
	WT			RIPK1 KO
Empty vector	1.0926	0.954291	0.953111	1.17546	0.901802	0.922734
RIPK3 WT	0.981624	0.985749	0.92743	0.999073	0.818142	0.781332
RIPK3 RM	1.14168	1.06929	0.909947	0.910662	0.867172	0.897895
RIPK3 KM	1.06702	1.08628	0.874072	1.01116	0.524904	0.89525
MLKL	0.985489	1.19376	0.952455	1.09345	0.712763	0.797027
MLKL + RIPK3 WT	1.05241	0.974189	0.958973	1.02761	0.857916	0.852346
MLKL + RIPK3 RM	1.0804	1.08221	1.03177	1.091	0.857164	0.855211
MLKL + RIPK3 KM	0.961825	0.98775	0.94444	1.16793	0.872254	0.972227
ZBP1	1.2058	1.14228	1.18753	1.26576	1.01836	1.18819
ZBP1 + RIPK3 WT	1.06449	1.12091	1.14673	0.968189	1.18336	1.03207
ZBP1 + RIPK3 RM	1.18994	1.13994	1.06577	1.39369	0.981684	0.936214
ZBP1 + RIPK3 KM	1.16743	1.18592	1.33886	1.05423	1.04082	1.12612
ZBP1 + MLKL	1.27797	1.13902	1.15394	0.897221	0.929132	1.18299
ZBP1 + MLKL + RIPK3 WT	5.79362	7.32736	4.55215	3.02358	3.85042	4.45094
MLKL + ZBP1 + RIPK3 RM	1.26733	1.44446	1.12741	0.991518	1.01745	1.40742
MLKL + ZBP1 + RIPK3 KM	1.16359	1.36131	1.30449	1.01359	1.21189	1.33269
