# Supplementary material for: Evolutionary and functional analyses reveal a role for the RHIM in tuning RIPK3 activity across vertebrates
Source: eLife. 2025 May 28;13:RP102301. doi: 10.7554/eLife.102301 (PMC12119088; doi:10.7554/eLife.102301)
Supplement: Figure 2—source data 1. [file elife-102301-fig2-data1.xlsx]

## Sheet: 2B-left
	WT						RIPK1 KO
Human	4.76287	6.06698	8.96373	6.79016	6.13296	7.73054	1.24002	0.644836		1.386	1.27829	0.876504
Mouse	14.035	11.44	13.1669	12.8473	6.40609	13.1331	0.675079	0.662633	1.30305	1.02968	1.32822	0.986652
Cat	2.61583	2.22422	4.63344	1.9149	2.46895	1.96598	0.441573		0.653967	0.568115	1.3749	1.31125
Pig	1.68817	1.35789	1.63077	1.04393	0.951128	1.21202	0.639169	0.283409	0.666155	0.741487	0.818751	0.779973

## Sheet: 2B-right
	WT						RIPK1 KO
Human	8.30264	6.45429	5.84397	7.39049	11.0708	5.94503	1.97635	2.74602	1.0307	1.64218	1.3656	1.32224
Lizard	15.1494	22.293	23.2777	23.5192	17.2993		13.0354	15.0241	19.8589	17.3931		16.9748
Turtle	4.78983	4.38718	6.39721	5.80687	4.72937	3.78452	5.29145	8.35851	5.79548	8.99921	6.00314	7.18473
Lamprey	0.976827	1.25576	1.49019	1.6072	1.58158	1.18375	0.748613	0.777541	0.551534	0.58226	1.65482	1.73946

## Sheet: 2C
	RIPK3 only			+MLKL + ZBP1
-	0.986374	1.11075	0.902879	0.981577	1.75844	1.05221
Human	0.986288	0.941532	0.930095	5.99672	5.68736	5.72656
Mouse	0.83618	0.894132	0.876911	1.64196	1.71306	1.70315
Cat	0.789331	0.847023	0.822547	1.03366	0.768618	0.883374
Pig	0.767748	0.768621	0.910135	3.45051	3.30494	3.25614
Lizard	0.775056	0.675232	0.858911	1.50176	1.64233	1.23816
Turtle	0.735359	0.773472	0.908293	0.93843	0.853581	0.84857
Lamprey	0.792709	0.667315	0.834178	0.861101	0.908758	0.855791
