# Supplementary material for: Evolutionary and functional analyses reveal a role for the RHIM in tuning RIPK3 activity across vertebrates
Source: eLife. 2025 May 28;13:RP102301. doi: 10.7554/eLife.102301 (PMC12119088; doi:10.7554/eLife.102301)
Supplement: Figure 3—figure supplement 1—source data 1. [file elife-102301-fig3-figsupp1-data1.xlsx]

## Sheet: Sheet1
	WT						RIPK1 KO
Lucifrease only	1.18562	0.863016	0.938187	0.813344	1.33849	0.861341	0.800816	0.762485	0.876365	1.52868	0.941384	1.09027
Lizard WT	64.5722	66.6795	61.2308	85.3715	69.9339	79.687	23.4609	23.969	32.4378	30.8923	24.5704	44.8208
LizardRHIM mutant	2.93293	2.73368	3.33617	3.55678	3.35166	2.12942	2.11264	1.41574	2.8927	2.74433	3.80762	3.46082
Lizard kinase mutant	70.4613	67.9603	78.7413	59.5432	73.1428		27.4803	27.4007	45.5163	42.3472	33.1939	29.972
Turtle WT	17.4763	26.663	23.8162	33.3317	27.3156	24.1583	12.33	13.7264	19.7893	19.1114	24.6839	15.2455
Turtle RHIM mutant	0.879313	1.20435	1.65314	2.10797	2.2032	2.20553	1.4352	1.03616	1.2964	1.63295	1.24821	1.75694
Turtle kinase mutant	20.9021	26.1549	28.3503	19.0651	35.9487	14.6547	10.2633	9.52782	17.1641	17.7827	16.2221	11.5126
Human WT	22.8789	23.8041	17.7017	23.1598	27.6327		1.39796	0.943312	1.49035	0.840957	1.27908
Human RHIM mutant	2.38323		2.98545	1.90391	1.62403		1.83421	1.24589	1.2295	1.58872	1.61086
Human kinase mutant	14.3006	21.0671	20.5995	22.5636	23.3592			1.22968	1.07493	1.42452	1.36509
