# Supplementary material for: Evolutionary and functional analyses reveal a role for the RHIM in tuning RIPK3 activity across vertebrates
Source: eLife. 2025 May 28;13:RP102301. doi: 10.7554/eLife.102301 (PMC12119088; doi:10.7554/eLife.102301)
Supplement: Figure 3—source data 1. [file elife-102301-fig3-data1.xlsx]

## Sheet: 3D
	WT						RHIM mutant
Human	14.0188	13.0516	13.4994	16.8398	23.0977	21.5577	1.07324	0.993851	1.87311	3.62287	2.41651	4.50606
Mouse	19.9903	15.9607	18.2288	40.3426	40.7124	37.883	3.42331	1.27558	1.18261	3.23809	2.08085	2.14687
Cat	6.3653	12.1755	11.9216	16.8998	25.7078	34.8577	1.2198	0.642178	0.677539	1.46094	1.34513

## Sheet: 3E
	WT				RHIM mutant
Human	20.7649	22.1467	19.9265	17.6563	1.65722		1.45258	1.26276
Lizard	31.0978	37.7096	24.499	32.6633	2.2696	2.3558	2.20941	1.83424
Turtle	14.2019	10.9433	8.13021	10.4119	1.18548	0.689128	0.962525	0.86824
Lamprey	1.67378	1.57898	1.3396	1.29353	2.89605	2.67786	2.36585	2.48373
