# Supplementary material for: Evolutionary and functional analyses reveal a role for the RHIM in tuning RIPK3 activity across vertebrates
Source: eLife. 2025 May 28;13:RP102301. doi: 10.7554/eLife.102301 (PMC12119088; doi:10.7554/eLife.102301)
Supplement: Figure 4—figure supplement 2—source data 1. [file elife-102301-fig4-figsupp2-data1.xlsx]

## Sheet: Sheet1
WT		RHIM mutant
Full length	C-terminus	Full length	C-terminus
45.8288	10.9646	51.1068	57.8862
50.9734	13.6831	50.504	49.9309
49.3012	25.1118	72.9602	52.6769
46.3607	35.4567	94.1402	43.5928
43.1467	35.2797	41.6402	68.6569
21.0121	33.1925	85.3242	36.7628
