# Supplementary material for: Evolutionary and functional analyses reveal a role for the RHIM in tuning RIPK3 activity across vertebrates
Source: eLife. 2025 May 28;13:RP102301. doi: 10.7554/eLife.102301 (PMC12119088; doi:10.7554/eLife.102301)
Supplement: Figure 4—figure supplement 3—source data 1. [file elife-102301-fig4-figsupp3-data1.xlsx]

## Sheet: Left
	WT						RIPK1 KO
Human	8.20723		19.645	34.2757	11.2394	27.9254	36.7536	36.5534	35.9264	32.0765	31.6696	37.8457
Mouse		75.7799	69.0731	92.2097	51.4504	63.8411	44.1997	50.6906	35.933	51.9996	60.1309	69.2554
Cat	32.7866	26.871	74.1211	93.8842	110.232	70.2384	63.6486	133.784	103.053	44.3796	93.5686	63.9433
Pig		40.4089	38.4737	57.7527	79.5965	44.4987	90.2716	90.3512	125.33	104.492	86.1713	95.949

## Sheet: Right
	WT						RIPK1 KO
Human	21.1696	24.7383	21.1677	21.4848			42.9897	38.9175	39.5035	33.9037	41.6233
Lizard	20.1786	21.6883	30.9917	18.5132			33.3452	64.0812	25.7454	48.0371	30.4529
Lamprey	4.8924	9.76298	6.44762	13.5232	14.1751		12.7101	12.4259		16.0576	18.0186
Mussel	14.6829	14.0751	14.3037	14.9556	15.3787		10.669	12.1199	10.0389	13.0279	10.87
