# Supplementary material for: Evolutionary and functional analyses reveal a role for the RHIM in tuning RIPK3 activity across vertebrates
Source: eLife. 2025 May 28;13:RP102301. doi: 10.7554/eLife.102301 (PMC12119088; doi:10.7554/eLife.102301)
Supplement: Figure 4—figure supplement 4—source data 1. [file elife-102301-fig4-figsupp4-data1.xlsx]

## Sheet: 4B
TRIF-WT	TRIF-RHIM mut
191.098	666.353
191.512	235.412
181.555	614.057

## Sheet: 4C
Luciferase only		TRIF
WT	RIPK1 KO	WT	RIPK1 KO
0.617101	0.977058	397.62	67.6015
0.931228	1.11488	329.878	184.018
1.45167	0.908061	366.342	162.831
