# Supplementary material for: Evolutionary and functional analyses reveal a role for the RHIM in tuning RIPK3 activity across vertebrates
Source: eLife. 2025 May 28;13:RP102301. doi: 10.7554/eLife.102301 (PMC12119088; doi:10.7554/eLife.102301)
Supplement: Figure 4—figure supplement 5—source data 1. [file elife-102301-fig4-figsupp5-data1.xlsx]

## Sheet: Sheet1
WT (VQVG)	AAAA	CQIG	LQIG	TQIG	VQFG	VQSG
17.6174	1.2859	2.78814	9.04145	0.979893	6.67963	2.41824
26.7388	2.58773	7.39778	11.2781	2.20557	12.1522	2.51491
30.6869	4.30276		9.85626	1.88269	10.8949	2.15704
25.8591	3.77907	10.0224	11.4781	1.93077	12.6177	2.91328
21.9187	2.58827	6.08788	12.4799	2.77876	8.99832	2.84487
20.3728	2.26551	7.54967	9.28212	2.80863	12.9917	2.42102
