# Supplementary material for: Evolutionary and functional analyses reveal a role for the RHIM in tuning RIPK3 activity across vertebrates
Source: eLife. 2025 May 28;13:RP102301. doi: 10.7554/eLife.102301 (PMC12119088; doi:10.7554/eLife.102301)
Supplement: Figure 4—source data 1. [file elife-102301-fig4-data1.xlsx]

## Sheet: 4B-left
	WT						RHIM mutant
Human		63.7456	53.5675	37.5682	57.9663		52.1582	57.1209	47.7697	39.7601	54.5555
Mouse	81.2531	148.805	107.516	133.014	147.68		37.2921	79.6106	151.414	154.123	111.779
Cat	58.9011	103.784	59.6441	103.118	90.3435		47.4805	87.7158	93.4501	144.559	102.603
Pig	25.2981	58.0696	86.0488	95.6646			36.2645	82.3938	80.0835	98.8953	64.726

## Sheet: 4B-right
	WT						RHIM mutant
Human	21.4342	13.6713	31.9518	19.1568	21.6901		20.8401	18.3584	24.3685	14.1823	21.4048
Lizard		30.4425	24.1221	29.5458	17.4073			6.89103	10.4762	10.1005	7.67835
Lamprey	5.20038	8.45382	9.93168	7.80128	13.5957		1.07551	0.796424	0.836304	1.28296	1.09593
Mussel	9.56591	9.80572	14.8098	10.2644	8.62289		3.38309	5.07921	3.40684	4.53077	3.96786

## Sheet: 4D
ZBP1-WT	ZBP1-RHIM1 mut	ZBP1-RHIM2 mut
12.6489	2.30834	18.3827
14.8084	3.21872	18.7209
19.0866	3.5766	18.786
16.4531	3.11193	14.7204
15.2825	3.00078	18.6473

## Sheet: 4E
Luciferase only	WT (VQVG)	AAAA	CQIG	LQIG	TQIG	VQFG	VQSG
0.592927	34.4404	2.24162	18.7501	14.1213	3.91319	17.4007	2.17269
1.21584	33.162	3.13499	14.7738	11.3021	2.55109	18.9165
1.13818	22.5328	3.52845			3.45062	21.1255	2.68798
0.958558	42.051	2.75932	20.9621	12.2473	1.90823	21.3509	2.98102
1.0945	26.0976	1.7593	14.9258	17.5005	2.37869	16.0389	2.73119
	35.1394	1.8638	10.644	18.7578	2.36806	16.0999	2.8468

## Sheet: 4F
	MLKL only			MLKL + ZBP1
No RIPK3	1.38845	0.835023	0.776523	1.40446	0.651966	1.0755
WT	1.82453	1.01342	1.00504	5.73415	7.12136	8.24836
AAAA	1.89896	1.09812	1.12483	1.11667	1.26193	1.45351
Kinase mutant	1.3275	1.33723	1.01799	1.23342	1.3847	1.00637
CQIG	0.937609	1.85659	2.04253	8.00128	8.56396	6.77486
LQIG	1.37535	1.52433	1.25702	6.6943	8.78443	6.80718
TQIG		1.05017	1.0998	5.96891	9.02302	3.57021
VQFG	1.11767	1.56793	1.19218	8.07845	7.50833	6.93885
VQSG	1.15586	1.15482	1.32515	3.28586	3.49195	4.18358
