# Supplementary material for: Evolutionary and functional analyses reveal a role for the RHIM in tuning RIPK3 activity across vertebrates
Source: eLife. 2025 May 28;13:RP102301. doi: 10.7554/eLife.102301 (PMC12119088; doi:10.7554/eLife.102301)
Supplement: Supplementary file 4. [file elife-102301-supp4.xlsx]

## Sheet: Sheet1
RIPK3	ZBP1	MLKL	RIPK1	RIPK2-total	RIPK2	RIPK2B	RIPK4	RIPK5	CASP2	CASP8	CASP9	CASP10	FADD	TRIF	NOD1	NOD2	IRF6
XP_032036053.1-receptor-interacting-serine/threonine-protein-kinase-3-[Hylobates-moloch]	XP_031750127.1-Z-DNA-binding-protein-1-[Xenopus-tropicalis]	XP_021112154.1-LOW-QUALITY-PROTEIN:-mixed-lineage-kinase-domain-like-protein-[Heterocephalus-glaber]	XP_050643155.1-receptor-interacting-serine/threonine-protein-kinase-1-isoform-X1-[Macaca-thibetana-thibetana]	XP_027685296.2-receptor-interacting-serine/threonine-protein-kinase-2-isoform-X1-[Chelonia-mydas]	XP_040349861.1-receptor-interacting-serine/threonine-protein-kinase-2-isoform-X1-[Puma-yagouaroundi]	XP_034281340.1-receptor-interacting-serine/threonine-protein-kinase-2-like-[Pantherophis-guttatus]	XP_024613900.1-receptor-interacting-serine/threonine-protein-kinase-4-[Neophocaena-asiaeorientalis-asiaeorientalis]	XP_012772585.1-ankyrin-repeat-and-protein-kinase-domain-containing-protein-1-[Maylandia-zebra]	XP_030874691.1-caspase-2-isoform-X2-[Leptonychotes-weddellii]	XP_023568078.1-caspase-8-isoform-X2-[Octodon-degus]	XP_032818164.1-caspase-9-[Petromyzon-marinus]	XP_052004700.1-caspase-8-[Xyrauchen-texanus]	XP_007421384.1-FAS-associated-death-domain-protein-like-[Python-bivittatus]	XP_035268028.1-TIR-domain-containing-adapter-molecule-1-isoform-X1-[Anguilla-anguilla]	XP_029573928.1-nucleotide-binding-oligomerization-domain-containing-protein-1-like-isoform-X9-[Salmo-trutta]	XP_032833593.1-nucleotide-binding-oligomerization-domain-containing-protein-2-like-isoform-X2-[Petromyzon-marinus]	XP_032816081.1-interferon-regulatory-factor-6-like-[Petromyzon-marinus]
XP_040926956.1-receptor-interacting-serine/threonine-protein-kinase-3-like-isoform-X1-[Betta-splendens]	XP_018090448.1-Z-DNA-binding-protein-1-[Xenopus-laevis]	XP_013010449.2-LOW-QUALITY-PROTEIN:-mixed-lineage-kinase-domain-like-protein-[Cavia-porcellus]	XP_007548798.1-PREDICTED:-receptor-interacting-serine/threonine-protein-kinase-1-[Poecilia-formosa]	XP_014820950.1-PREDICTED:-receptor-interacting-serine/threonine-protein-kinase-2-isoform-X4-[Calidris-pugnax]	XP_012868051.1-PREDICTED:-receptor-interacting-serine/threonine-protein-kinase-2-isoform-X1-[Dipodomys-ordii]	XP_042293925.1-receptor-interacting-serine/threonine-protein-kinase-2-like-[Sceloporus-undulatus]	XP_045357270.1-receptor-interacting-serine/threonine-protein-kinase-4-[Leopardus-geoffroyi]	XP_040048378.1-ankyrin-repeat-and-protein-kinase-domain-containing-protein-1-isoform-X1-[Gasterosteus-aculeatus-aculeatus]	XP_028567303.1-caspase-2-isoform-X2-[Podarcis-muralis]	XP_030066354.1-caspase-8-like-[Microcaecilia-unicolor]	XP_043916375.1-caspase-9-[Protopterus-annectens]	XP_015723624.1-caspase-10-isoform-X1-[Coturnix-japonica]	XP_027711773.1-FAS-associated-death-domain-protein-[Vombatus-ursinus]	XP_027580340.2-TIR-domain-containing-adapter-molecule-1-[Pipra-filicauda]	XP_029573924.1-nucleotide-binding-oligomerization-domain-containing-protein-1-like-isoform-X6-[Salmo-trutta] (2)	XP_038610111.1-nucleotide-binding-oligomerization-domain-containing-protein-2-[Tachyglossus-aculeatus]	XP_012589665.1-PREDICTED:-interferon-regulatory-factor-6-[Condylura-cristata]
XP_020505003.1-receptor-interacting-serine/threonine-protein-kinase-3-like-isoform-X2-[Labrus-bergylta]	XP_053549009.1-uncharacterized-protein-LOC128640550-isoform-X2-[Bombina-bombina]	XP_053463745.1-mixed-lineage-kinase-domain-like-protein-isoform-X2-[Nycticebus-coucang]	XP_035271365.1-receptor-interacting-serine/threonine-protein-kinase-1-like-isoform-X1-[Anguilla-anguilla]	XP_031525826.1-receptor-interacting-serine/threonine-protein-kinase-2-isoform-X1-[Papio-anubis]	XP_010902529.2-receptor-interacting-serine/threonine-protein-kinase-2-isoform-X1-[Esox-lucius]	XP_045545016.1-receptor-interacting-serine/threonine-protein-kinase-2-isoform-X3-[Salmo-salar]	XP_051972626.1-receptor-interacting-serine/threonine-protein-kinase-4-[Xyrauchen-texanus]	XP_032365334.1-ankyrin-repeat-and-protein-kinase-domain-containing-protein-1-[Etheostoma-spectabile]	XP_054349649.1-caspase-2-isoform-X3-[Pongo-pygmaeus]	XP_024419718.2-caspase-8-[Desmodus-rotundus]	XP_050178573.1-caspase-9-[Myiozetetes-cayanensis]	XP_034742316.1-caspase-8-isoform-X1-[Etheostoma-cragini]	XP_010013910.1-PREDICTED:-FAS-associated-death-domain-protein,-partial-[Nestor-notabilis]	XP_013926540.1-PREDICTED:-TIR-domain-containing-adapter-molecule-1-[Thamnophis-sirtalis]	XP_029573923.1-nucleotide-binding-oligomerization-domain-containing-protein-1-like-isoform-X5-[Salmo-trutta] (2)	XP_028931876.1-nucleotide-binding-oligomerization-domain-containing-protein-2-isoform-X2-[Ornithorhynchus-anatinus] (2)	XP_059944241.1-interferon-regulatory-factor-6-like-[Mesoplodon-densirostris]
XP_026990752.1-receptor-interacting-serine/threonine-protein-kinase-3-isoform-X1-[Tachysurus-fulvidraco]	XP_053548998.1-uncharacterized-protein-LOC128640550-isoform-X1-[Bombina-bombina]	XP_023980672.1-LOW-QUALITY-PROTEIN:-mixed-lineage-kinase-domain-like-protein-[Physeter-catodon]	XP_042794001.1-receptor-interacting-serine/threonine-protein-kinase-1-[Panthera-leo]	XP_022610507.1-receptor-interacting-serine/threonine-protein-kinase-2-isoform-X1-[Seriola-dumerili]	XP_046178288.1-receptor-interacting-serine/threonine-protein-kinase-2-like-[Oncorhynchus-gorbuscha]	XP_038825868.1-receptor-interacting-serine/threonine-protein-kinase-2-like-isoform-X1-[Salvelinus-namaycush]	XP_030827045.1-LOW-QUALITY-PROTEIN:-receptor-interacting-serine/threonine-protein-kinase-4-[Camarhynchus-parvulus]	XP_014862944.1-PREDICTED:-ankyrin-repeat-and-protein-kinase-domain-containing-protein-1-[Poecilia-mexicana]	XP_042782858.1-caspase-2-isoform-X1-[Panthera-leo]	XP_008685574.1-caspase-8-isoform-X1-[Ursus-maritimus]	XP_027760862.1-caspase-9-[Empidonax-traillii]	XP_010990276.1-LOW-QUALITY-PROTEIN:-caspase-10-[Camelus-dromedarius]	XP_052050369.1-FAS-associated-death-domain-protein-[Apodemus-sylvaticus]	XP_024130230.1-TIR-domain-containing-adapter-molecule-1-[Oryzias-melastigma]	XP_029573922.1-nucleotide-binding-oligomerization-domain-containing-protein-1-like-isoform-X4-[Salmo-trutta] (2)	XP_028931879.1-nucleotide-binding-oligomerization-domain-containing-protein-2-isoform-X3-[Ornithorhynchus-anatinus] (2)	XP_059960215.1-interferon-regulatory-factor-6-like-isoform-X1-[Mesoplodon-densirostris]
XP_052459289.1-receptor-interacting-serine/threonine-protein-kinase-3-like-isoform-X2-[Carassius-gibelio]	XP_040185921.1-Z-DNA-binding-protein-1-isoform-X2-[Rana-temporaria]	XP_007463056.1-PREDICTED:-LOW-QUALITY-PROTEIN:-mixed-lineage-kinase-domain-like-protein-[Lipotes-vexillifer]	XP_037004641.1-receptor-interacting-serine/threonine-protein-kinase-1-isoform-X2-[Artibeus-jamaicensis]	XP_014820951.1-PREDICTED:-receptor-interacting-serine/threonine-protein-kinase-2-isoform-X5-[Calidris-pugnax]	XP_010976526.1-receptor-interacting-serine/threonine-protein-kinase-2-[Camelus-dromedarius]	XP_046202231.1-receptor-interacting-serine/threonine-protein-kinase-2-like-isoform-X1-[Oncorhynchus-gorbuscha]	XP_035482619.2-receptor-interacting-serine/threonine-protein-kinase-4-[Scophthalmus-maximus]	XP_017738492.1-PREDICTED:-LOW-QUALITY-PROTEIN:-ankyrin-repeat-and-protein-kinase-domain-containing-protein-1-[Rhinopithecus-bieti]	XP_034466992.1-caspase-2-isoform-X1-[Hippoglossus-hippoglossus]	XP_007469276.1-PREDICTED:-caspase-8-[Lipotes-vexillifer]	XP_027592171.2-caspase-9-[Pipra-filicauda]	XP_018936701.1-caspase-8-like-isoform-X1-[Cyprinus-carpio]	XP_014030646.2-FAS-associated-death-domain-protein-[Salmo-salar]	XP_035027348.1-TIR-domain-containing-adapter-molecule-1-[Hippoglossus-stenolepis]	XP_029573921.1-nucleotide-binding-oligomerization-domain-containing-protein-1-like-isoform-X3-[Salmo-trutta]	XP_001519938.2-nucleotide-binding-oligomerization-domain-containing-protein-2-isoform-X1-[Ornithorhynchus-anatinus]	XP_059959606.1-interferon-regulatory-factor-6-like-[Mesoplodon-densirostris]
XP_031440643.1-receptor-interacting-serine/threonine-protein-kinase-3-isoform-X1-[Clupea-harengus]	XP_040185920.1-Z-DNA-binding-protein-1-isoform-X1-[Rana-temporaria]	XP_026975717.1-LOW-QUALITY-PROTEIN:-mixed-lineage-kinase-domain-like-protein-[Lagenorhynchus-obliquidens]	XP_043575393.1-receptor-interacting-serine/threonine-protein-kinase-1-isoform-X1-[Chiloscyllium-plagiosum]	XP_019139741.2-receptor-interacting-serine/threonine-protein-kinase-2-[Corvus-cornix-cornix]	XP_019958357.1-PREDICTED:-receptor-interacting-serine/threonine-protein-kinase-2-isoform-X3-[Paralichthys-olivaceus]	XP_029821059.1-receptor-interacting-serine/threonine-protein-kinase-2-like-[Manacus-vitellinus]	XP_051464143.1-receptor-interacting-serine/threonine-protein-kinase-4-[Apus-apus]	XP_052642570.1-ankyrin-repeat-and-protein-kinase-domain-containing-protein-1-[Harpia-harpyja]	XP_044064928.1-caspase-2-isoform-X1-[Siniperca-chuatsi]	XP_009944511.1-PREDICTED:-caspase-8,-partial-[Leptosomus-discolor]	XP_051642456.1-caspase-9-[Manacus-candei]	XP_006802829.1-caspase-8,-partial-[Neolamprologus-brichardi]	XP_009332814.1-PREDICTED:-FAS-associated-death-domain-protein,-partial-[Pygoscelis-adeliae]	XP_026544024.1-TIR-domain-containing-adapter-molecule-1-[Notechis-scutatus]	XP_029573920.1-nucleotide-binding-oligomerization-domain-containing-protein-1-like-isoform-X2-[Salmo-trutta]	XP_051835786.1-nucleotide-binding-oligomerization-domain-containing-protein-2-isoform-X1-[Antechinus-flavipes] (2)	XP_059961276.1-uncharacterized-protein-LOC132494286-isoform-X3-[Mesoplodon-densirostris]
XP_011225571.1-receptor-interacting-serine/threonine-protein-kinase-3-isoform-X3-[Ailuropoda-melanoleuca]	XP_040185924.1-Z-DNA-binding-protein-1-isoform-X4-[Rana-temporaria]	XP_033290579.2-LOW-QUALITY-PROTEIN:-mixed-lineage-kinase-domain-like-protein-[Orcinus-orca]	XP_018124942.1-receptor-interacting-serine/threonine-protein-kinase-1-[Xenopus-laevis]	XP_036597789.1-receptor-interacting-serine/threonine-protein-kinase-2-[Trichosurus-vulpecula]	XP_041805060.1-receptor-interacting-serine/threonine-protein-kinase-2-like-isoform-X2-[Chelmon-rostratus]	XP_023790498.1-receptor-interacting-serine/threonine-protein-kinase-2-like-isoform-X2-[Cyanistes-caeruleus]	XP_038317781.1-receptor-interacting-serine/threonine-protein-kinase-4-isoform-X1-[Canis-lupus-familiaris]	NP_766510.1-ankyrin-repeat-and-protein-kinase-domain-containing-protein-1-isoform-2-[Mus-musculus]	XP_041649083.1-caspase-2-isoform-X3-[Cheilinus-undulatus]	XP_030310556.1-caspase-8-like-isoform-X1-[Calypte-anna]	XP_029818242.1-caspase-9-[Manacus-vitellinus]	XP_027020037.1-caspase-8-isoform-X4-[Tachysurus-fulvidraco]	XP_040296290.1-caspase-8-like-[Bufo-bufo]	XP_008835192.1-TIR-domain-containing-adapter-molecule-1-[Nannospalax-galili]	XP_029573919.1-nucleotide-binding-oligomerization-domain-containing-protein-1-like-isoform-X1-[Salmo-trutta] (2)	XP_031810339.1-nucleotide-binding-oligomerization-domain-containing-protein-2-isoform-X2-[Sarcophilus-harrisii]	XP_059961275.1-U3-small-nucleolar-RNA-associated-protein-25-homolog-isoform-X2-[Mesoplodon-densirostris]
XP_034532636.1-receptor-interacting-serine/threonine-protein-kinase-3-[Notolabrus-celidotus]	XP_040185925.1-Z-DNA-binding-protein-1-isoform-X5-[Rana-temporaria]	XP_019797052.1-LOW-QUALITY-PROTEIN:-mixed-lineage-kinase-domain-like-protein-[Tursiops-truncatus]	XP_038159808.1-receptor-interacting-serine/threonine-protein-kinase-1-[Cyprinodon-tularosa]	XP_013368207.1-PREDICTED:-receptor-interacting-serine/threonine-protein-kinase-2-[Chinchilla-lanigera]	XP_015310496.2-receptor-interacting-serine/threonine-protein-kinase-2-isoform-X2-[Macaca-fascicularis]	XP_005444641.3-receptor-interacting-serine/threonine-protein-kinase-2-like-isoform-X1-[Falco-cherrug]	XP_030059678.1-receptor-interacting-serine/threonine-protein-kinase-4-isoform-X1-[Microcaecilia-unicolor]	XP_045885733.1-ankyrin-repeat-and-protein-kinase-domain-containing-protein-1-[Micropterus-dolomieu]	XP_009910597.1-PREDICTED:-caspase-2-[Haliaeetus-albicilla]	XP_009894798.2-caspase-8-like-[Dryobates-pubescens]	XP_017687439.1-PREDICTED:-caspase-9-[Lepidothrix-coronata]	XP_017547820.1-caspase-8-isoform-X3-[Pygocentrus-nattereri]	XP_011896682.1-PREDICTED:-FAS-associated-death-domain-protein-[Cercocebus-atys]	XP_060940131.1-TIR-domain-containing-adapter-molecule-1-[Limanda-limanda]	XP_029573925.1-nucleotide-binding-oligomerization-domain-containing-protein-1-like-isoform-X7-[Salmo-trutta]	XP_031810335.1-nucleotide-binding-oligomerization-domain-containing-protein-2-isoform-X1-[Sarcophilus-harrisii]	XP_059961277.1-uncharacterized-protein-LOC132494286-isoform-X4-[Mesoplodon-densirostris]
XP_030660011.1-receptor-interacting-serine/threonine-protein-kinase-3-[Nomascus-leucogenys]	XP_040185922.1-Z-DNA-binding-protein-1-isoform-X3-[Rana-temporaria]	XP_030719681.1-LOW-QUALITY-PROTEIN:-mixed-lineage-kinase-domain-like-protein-[Globicephala-melas]	XP_011749070.1-receptor-interacting-serine/threonine-protein-kinase-1-isoform-X2-[Macaca-nemestrina]	XP_009555412.1-PREDICTED:-receptor-interacting-serine/threonine-protein-kinase-2-like-[Cuculus-canorus]	XP_022069156.1-receptor-interacting-serine/threonine-protein-kinase-2-isoform-X1-[Acanthochromis-polyacanthus]	XP_044126202.1-receptor-interacting-serine/threonine-protein-kinase-2-like-[Bufo-gargarizans]	XP_047652987.1-receptor-interacting-serine/threonine-protein-kinase-4-[Phacochoerus-africanus]	XP_010402109.2-ankyrin-repeat-and-protein-kinase-domain-containing-protein-1-[Corvus-cornix-cornix]	XP_026140032.1-caspase-2-like-isoform-X1-[Carassius-auratus]	XP_050755885.1-caspase-8-like-isoform-X1-[Gymnogyps-californianus]	XP_027514061.1-caspase-9-[Corapipo-altera]	XP_048096051.1-caspase-8-isoform-X2-[Alosa-alosa]	XP_048125368.1-FAS-associated-death-domain-protein-like-[Alosa-alosa]	XP_040485471.1-TIR-domain-containing-adapter-molecule-1-[Ursus-maritimus]	XP_031796124.1-LOW-QUALITY-PROTEIN:-nucleotide-binding-oligomerization-domain-containing-protein-1-[Sarcophilus-harrisii]	XP_044517352.1-nucleotide-binding-oligomerization-domain-containing-protein-2-[Gracilinanus-agilis]	XP_059961274.1-uncharacterized-protein-LOC132494286-isoform-X1-[Mesoplodon-densirostris]
XP_011383838.1-receptor-interacting-serine/threonine-protein-kinase-3-isoform-X3-[Pteropus-vampyrus]	XP_056403998.1-Z-DNA-binding-protein-1-isoform-X2-[Hyla-sarda]	XP_029061253.1-LOW-QUALITY-PROTEIN:-mixed-lineage-kinase-domain-like-protein-[Monodon-monoceros]	XP_022614036.1-receptor-interacting-serine/threonine-protein-kinase-1-isoform-X2-[Seriola-dumerili]	XP_051466785.1-receptor-interacting-serine/threonine-protein-kinase-2-isoform-X2-[Apus-apus]	XP_021486587.1-receptor-interacting-serine/threonine-protein-kinase-2-isoform-X1-[Meriones-unguiculatus]	XP_021462712.2-receptor-interacting-serine/threonine-protein-kinase-2-isoform-X2-[Oncorhynchus-mykiss]	XP_017710681.1-PREDICTED:-LOW-QUALITY-PROTEIN:-receptor-interacting-serine/threonine-protein-kinase-4-[Rhinopithecus-bieti]	XP_007109571.3-LOW-QUALITY-PROTEIN:-ankyrin-repeat-and-protein-kinase-domain-containing-protein-1-[Physeter-catodon]	XP_021020316.1-caspase-2-isoform-X1-[Mus-caroli]	XP_033086609.1-caspase-8-isoform-X2-[Trachypithecus-francoisi]	XP_032565119.1-caspase-9-[Chiroxiphia-lanceolata]	XP_034417177.1-caspase-8-isoform-X2-[Cyclopterus-lumpus]	XP_044922230.1-FAS-associated-death-domain-protein-isoform-X1-[Mustela-putorius-furo]	XP_049644266.1-TIR-domain-containing-adapter-molecule-1-[Suncus-etruscus]	XP_043920962.1-nucleotide-binding-oligomerization-domain-containing-protein-1-like-[Protopterus-annectens] (2)	XP_056668265.1-nucleotide-binding-oligomerization-domain-containing-protein-2-isoform-X2-[Monodelphis-domestica]	XP_014859753.1-PREDICTED:-interferon-regulatory-factor-6-like-[Poecilia-mexicana]
XP_003223896.2-PREDICTED:-receptor-interacting-serine/threonine-protein-kinase-3-isoform-X1-[Anolis-carolinensis]	XP_056403995.1-Z-DNA-binding-protein-1-isoform-X1-[Hyla-sarda]	XP_024591477.1-LOW-QUALITY-PROTEIN:-mixed-lineage-kinase-domain-like-protein-[Neophocaena-asiaeorientalis-asiaeorientalis]	XP_028659836.2-receptor-interacting-serine/threonine-protein-kinase-1-isoform-X1-[Erpetoichthys-calabaricus]	XP_010181516.1-PREDICTED:-receptor-interacting-serine/threonine-protein-kinase-2-[Mesitornis-unicolor]	XP_045868647.1-receptor-interacting-serine/threonine-protein-kinase-2-[Meles-meles]	XP_040265801.1-receptor-interacting-serine/threonine-protein-kinase-2-like-isoform-X1-[Bufo-bufo]	XP_020486818.1-receptor-interacting-serine/threonine-protein-kinase-4-[Labrus-bergylta]	XP_003952091.2-LOW-QUALITY-PROTEIN:-ankyrin-repeat-and-protein-kinase-domain-containing-protein-1-[Pan-troglodytes]	NP_001036160.1-caspase-2-[Danio-rerio]	XP_019347898.1-PREDICTED:-caspase-8-isoform-X2-[Alligator-mississippiensis]	XP_027558692.1-caspase-9-[Neopelma-chrysocephalum]	XP_047457963.1-caspase-8-isoform-X2-[Mugil-cephalus]	XP_011957602.2-FAS-associated-death-domain-protein-[Ovis-aries]	XP_008280480.1-PREDICTED:-TIR-domain-containing-adapter-molecule-1-like-isoform-X2-[Stegastes-partitus]	XP_014343039.1-PREDICTED:-nucleotide-binding-oligomerization-domain-containing-protein-1-isoform-X2-[Latimeria-chalumnae] (2)	XP_056668266.1-nucleotide-binding-oligomerization-domain-containing-protein-2-isoform-X3-[Monodelphis-domestica]	XP_055511107.1-interferon-regulatory-factor-6-like-[Leucoraja-erinacea]
XP_030286373.1-receptor-interacting-serine/threonine-protein-kinase-3-like-[Sparus-aurata]	XP_044155932.1-Z-DNA-binding-protein-1-isoform-X4-[Bufo-gargarizans]	XP_022439277.2-LOW-QUALITY-PROTEIN:-mixed-lineage-kinase-domain-like-protein-[Delphinapterus-leucas]	XP_031543912.1-receptor-interacting-serine/threonine-protein-kinase-1-isoform-X1-[Vicugna-pacos]	XP_032724973.1-receptor-interacting-serine/threonine-protein-kinase-2-isoform-X2-[Lontra-canadensis]	XP_038574347.1-receptor-interacting-serine/threonine-protein-kinase-2-like-isoform-X1-[Micropterus-salmoides]	XP_033013122.1-receptor-interacting-serine/threonine-protein-kinase-2-like-isoform-X1-[Lacerta-agilis]	XP_032756241.1-receptor-interacting-serine/threonine-protein-kinase-4-[Rattus-rattus]	XP_034405166.1-ankyrin-repeat-and-protein-kinase-domain-containing-protein-1-isoform-X2-[Cyclopterus-lumpus]	XP_055191054.1-caspase-2-isoform-X1-[Nyctereutes-procyonoides]	XP_039925760.1-caspase-8-like-[Hirundo-rustica]	XP_057241375.1-caspase-9-isoform-X2-[Malurus-melanocephalus]	XP_017400769.1-caspase-10-[Cebus-imitator]	XP_029000644.1-protein-FADD-[Betta-splendens]	XP_017597972.1-PREDICTED:-TIR-domain-containing-adapter-molecule-1-[Corvus-brachyrhynchos]	XP_014343038.1-PREDICTED:-nucleotide-binding-oligomerization-domain-containing-protein-1-isoform-X1-[Latimeria-chalumnae] (2)	XP_016283938.2-nucleotide-binding-oligomerization-domain-containing-protein-2-isoform-X1-[Monodelphis-domestica]	XP_007897748.1-interferon-regulatory-factor-6-[Callorhinchus-milii]
XP_032199847.1-receptor-interacting-serine/threonine-protein-kinase-3-isoform-X2-[Mustela-erminea]	XP_044155929.1-Z-DNA-binding-protein-1-isoform-X2-[Bufo-gargarizans]	XP_032470718.1-LOW-QUALITY-PROTEIN:-mixed-lineage-kinase-domain-like-protein-[Phocoena-sinus]	XP_041421503.1-receptor-interacting-serine/threonine-kinase-1-L-homeolog-isoform-X2-[Xenopus-laevis]	XP_036939000.1-receptor-interacting-serine/threonine-protein-kinase-2-like-isoform-X1-[Acanthopagrus-latus]	XP_017393536.1-receptor-interacting-serine/threonine-protein-kinase-2-isoform-X2-[Cebus-imitator]	XP_041078217.1-receptor-interacting-serine/threonine-protein-kinase-2-[Polyodon-spathula]	XP_004384931.1-receptor-interacting-serine/threonine-protein-kinase-4-[Trichechus-manatus-latirostris]	XP_013860713.1-PREDICTED:-ankyrin-repeat-and-protein-kinase-domain-containing-protein-1-[Austrofundulus-limnaeus]	XP_005657777.1-caspase-2-[Sus-scrofa]	XP_038605767.1-caspase-8-like-[Tachyglossus-aculeatus]	XP_057241374.1-caspase-9-isoform-X1-[Malurus-melanocephalus]	XP_017547818.1-caspase-8-isoform-X1-[Pygocentrus-nattereri]	XP_032610877.1-caspase-10-isoform-X3-[Hylobates-moloch]	XP_010774263.1-PREDICTED:-TIR-domain-containing-adapter-molecule-1-like-[Notothenia-coriiceps]	XP_042188096.1-nucleotide-binding-oligomerization-domain-containing-protein-1-like-[Callorhinchus-milii]	XP_043843179.1-LOW-QUALITY-PROTEIN:-nucleotide-binding-oligomerization-domain-containing-protein-2-[Dromiciops-gliroides]	XP_059805988.1-interferon-regulatory-factor-6-[Hypanus-sabinus]
XP_012668273.1-receptor-interacting-serine/threonine-protein-kinase-3-[Otolemur-garnettii]	XP_044155931.1-Z-DNA-binding-protein-1-isoform-X3-[Bufo-gargarizans]	XP_038610628.1-mixed-lineage-kinase-domain-like-protein-[Tachyglossus-aculeatus]	XP_026514522.1-receptor-interacting-serine/threonine-protein-kinase-1-[Terrapene-carolina-triunguis]	XP_051466784.1-receptor-interacting-serine/threonine-protein-kinase-2-isoform-X1-[Apus-apus]	XP_022357889.1-receptor-interacting-serine/threonine-protein-kinase-2-isoform-X1-[Enhydra-lutris-kenyoni]	XP_018421872.1-PREDICTED:-receptor-interacting-serine/threonine-protein-kinase-2-like-[Nanorana-parkeri]	XP_041067988.1-receptor-interacting-serine/threonine-protein-kinase-4-[Carcharodon-carcharias]	XP_007934723.1-ankyrin-repeat-and-protein-kinase-domain-containing-protein-1-[Orycteropus-afer-afer]	XP_032160816.1-caspase-2-isoform-X2-[Mustela-erminea]	XP_008685575.1-caspase-8-isoform-X2-[Ursus-maritimus]	XP_015503874.1-caspase-9-isoform-X2-[Parus-major]	XP_028446855.1-caspase-8-like-[Perca-flavescens]	XP_029944186.1-FAS-associated-death-domain-protein-[Salarias-fasciatus]	XP_029380951.1-TIR-domain-containing-adapter-molecule-1-like-[Echeneis-naucrates]	XP_055522154.1-nucleotide-binding-oligomerization-domain-containing-protein-1-like-[Leucoraja-erinacea] (2)	XP_036607169.1-nucleotide-binding-oligomerization-domain-containing-protein-2-[Trichosurus-vulpecula] (2)	XP_051890779.1-interferon-regulatory-factor-6-[Pristis-pectinata]
XP_034735749.1-receptor-interacting-serine/threonine-protein-kinase-3-like-isoform-X2-[Etheostoma-cragini]	XP_044155928.1-Z-DNA-binding-protein-1-isoform-X1-[Bufo-gargarizans]	XP_008821194.1-LOW-QUALITY-PROTEIN:-mixed-lineage-kinase-domain-like-protein-[Nannospalax-galili]	XP_004387623.1-receptor-interacting-serine/threonine-protein-kinase-1-[Trichechus-manatus-latirostris]	XP_006859294.1-PREDICTED:-receptor-interacting-serine/threonine-protein-kinase-2-like-[Chrysochloris-asiatica]	XP_036788456.1-receptor-interacting-serine/threonine-protein-kinase-2-isoform-X1-[Manis-pentadactyla]	XP_031686629.1-receptor-interacting-serine/threonine-protein-kinase-2-like-isoform-X2-[Oncorhynchus-kisutch]	XP_026185131.1-receptor-interacting-serine/threonine-protein-kinase-4-[Mastacembelus-armatus]	XP_032450902.1-ankyrin-repeat-and-protein-kinase-domain-containing-protein-1-[Lynx-canadensis]	XP_036184373.1-caspase-2-isoform-X8-[Myotis-myotis]	NP_001026949.2-caspase-8-[Sus-scrofa]	XP_033375227.1-caspase-9-isoform-X1-[Parus-major]	XP_036401141.1-caspase-8-like-isoform-X2-[Megalops-cyprinoides]	XP_043308099.1-FAS-associated-death-domain-protein-[Cervus-canadensis]	XP_010736595.2-TIR-domain-containing-adapter-molecule-1-[Larimichthys-crocea]	XP_032872714.1-nucleotide-binding-oligomerization-domain-containing-protein-1-like-[Amblyraja-radiata]	XP_027725378.1-nucleotide-binding-oligomerization-domain-containing-protein-2-isoform-X2-[Vombatus-ursinus]	XP_060701408.1-interferon-regulatory-factor-6-[Hemiscyllium-ocellatum]
XP_051996622.1-receptor-interacting-serine/threonine-protein-kinase-3-isoform-X1-[Xyrauchen-texanus]	XP_040292607.1-Z-DNA-binding-protein-1-isoform-X2-[Bufo-bufo]	XP_045389908.1-mixed-lineage-kinase-domain-like-protein-isoform-X2-[Lemur-catta]	XP_010120103.1-PREDICTED:-receptor-interacting-serine/threonine-protein-kinase-1-[Chlamydotis-macqueenii]	XP_003479939.3-receptor-interacting-serine/threonine-protein-kinase-2,-partial-[Cavia-porcellus]	XP_012039554.1-receptor-interacting-serine/threonine-protein-kinase-2-[Ovis-aries]	XP_038003783.1-receptor-interacting-serine/threonine-protein-kinase-2-like-isoform-X1-[Motacilla-alba-alba]	XP_010071195.1-PREDICTED:-receptor-interacting-serine/threonine-protein-kinase-4-[Pterocles-gutturalis]	XP_017347023.1-ankyrin-repeat-and-protein-kinase-domain-containing-protein-1-[Ictalurus-punctatus]	XP_056655805.1-caspase-2-isoform-X3-[Monodelphis-domestica]	NP_001387574.1-caspase-8-isoform-9-[Homo-sapiens]	XP_005528445.1-PREDICTED:-caspase-9-isoform-X2-[Pseudopodoces-humilis]	XP_015214953.1-PREDICTED:-caspase-8-like-[Lepisosteus-oculatus]	XP_036717426.1-FAS-associated-death-domain-protein-isoform-X6-[Balaenoptera-musculus]	XP_053186289.1-TIR-domain-containing-adapter-molecule-1-[Scomber-japonicus]	XP_051872917.1-nucleotide-binding-oligomerization-domain-containing-protein-1-like-[Pristis-pectinata]	XP_027725376.1-nucleotide-binding-oligomerization-domain-containing-protein-2-isoform-X1-[Vombatus-ursinus]	XP_043572560.1-interferon-regulatory-factor-6-[Chiloscyllium-plagiosum]
XP_030043808.1-receptor-interacting-serine/threonine-protein-kinase-3-[Microcaecilia-unicolor]	XP_040292608.1-Z-DNA-binding-protein-1-isoform-X3-[Bufo-bufo]	XP_045389907.1-mixed-lineage-kinase-domain-like-protein-isoform-X1-[Lemur-catta]	XP_039102471.1-receptor-interacting-serine/threonine-protein-kinase-1-[Hyaena-hyaena]	XP_023776841.1-receptor-interacting-serine/threonine-protein-kinase-2-[Cyanistes-caeruleus]	XP_042184510.1-receptor-interacting-serine/threonine-protein-kinase-2-isoform-X2-[Oncorhynchus-tshawytscha]	XP_014736267.1-PREDICTED:-receptor-interacting-serine/threonine-protein-kinase-2-like-isoform-X1-[Sturnus-vulgaris]	XP_015845619.1-receptor-interacting-serine/threonine-protein-kinase-4-isoform-X1-[Peromyscus-maniculatus-bairdii]	XP_030633961.1-ankyrin-repeat-and-protein-kinase-domain-containing-protein-1-[Chanos-chanos]	XP_009930304.1-PREDICTED:-caspase-2-[Opisthocomus-hoazin]	XP_025045693.1-caspase-8-isoform-X2-[Pelodiscus-sinensis]	XP_014112685.1-PREDICTED:-caspase-9-isoform-X1-[Pseudopodoces-humilis]	XP_054236982.1-caspase-10-[Indicator-indicator]	XP_047630994.1-FAS-associated-death-domain-protein-isoform-X2-[Phacochoerus-africanus]	NP_001372607.1-TIR-domain-containing-adapter-molecule-1-isoform-2-[Homo-sapiens]	XP_059801348.1-nucleotide-binding-oligomerization-domain-containing-protein-1-like-isoform-X1-[Hypanus-sabinus]	XP_020840821.1-nucleotide-binding-oligomerization-domain-containing-protein-2-[Phascolarctos-cinereus] (2)	XP_048468166.1-interferon-regulatory-factor-6-isoform-X1-[Rhincodon-typus]
XP_023083102.1-receptor-interacting-serine/threonine-protein-kinase-3-isoform-X1-[Piliocolobus-tephrosceles]	XP_040292606.1-Z-DNA-binding-protein-1-isoform-X1-[Bufo-bufo]	XP_036690746.1-LOW-QUALITY-PROTEIN:-mixed-lineage-kinase-domain-like-protein-[Balaenoptera-musculus]	XP_041331399.1-receptor-interacting-serine/threonine-protein-kinase-1-isoform-X2-[Pyrgilauda-ruficollis]	XP_038204260.1-receptor-interacting-serine/threonine-protein-kinase-2-isoform-X2-[Arvicola-amphibius]	XP_007052976.3-receptor-interacting-serine/threonine-protein-kinase-2-isoform-X1-[Chelonia-mydas]	XP_050760226.1-receptor-interacting-serine/threonine-protein-kinase-2-like-isoform-X1-[Gymnogyps-californianus]	XP_035291097.1-receptor-interacting-serine/threonine-protein-kinase-4-like-isoform-X2-[Anguilla-anguilla]	XP_040486642.1-LOW-QUALITY-PROTEIN:-ankyrin-repeat-and-protein-kinase-domain-containing-protein-1-[Ursus-maritimus]	XP_017750773.1-PREDICTED:-caspase-2-isoform-X3-[Rhinopithecus-bieti]	XP_014734964.1-PREDICTED:-caspase-8-like-[Sturnus-vulgaris]	XP_039940576.1-caspase-9-[Hirundo-rustica]	XP_054492043.1-caspase-10-like-isoform-X2-[Agelaius-phoeniceus]	XP_033961513.1-FAS-associated-death-domain-protein-[Pseudochaenichthys-georgianus]	XP_039734357.1-TIR-domain-containing-adapter-molecule-1-[Pteropus-giganteus]	XP_059801349.1-nucleotide-binding-oligomerization-domain-containing-protein-1-like-isoform-X2-[Hypanus-sabinus]	XP_048211585.1-nucleotide-binding-oligomerization-domain-containing-protein-2-isoform-X4-[Perognathus-longimembris-pacificus]	XP_048468167.1-interferon-regulatory-factor-6-isoform-X2-[Rhincodon-typus]
XP_040189075.1-receptor-interacting-serine/threonine-protein-kinase-3-like-isoform-X2-[Rana-temporaria]	XP_040292609.1-Z-DNA-binding-protein-1-isoform-X4-[Bufo-bufo]	XP_057390934.1-LOW-QUALITY-PROTEIN:-mixed-lineage-kinase-domain-like-protein-[Balaenoptera-acutorostrata]	XP_012872177.1-PREDICTED:-receptor-interacting-serine/threonine-protein-kinase-1-[Dipodomys-ordii]	XP_018532737.1-receptor-interacting-serine/threonine-protein-kinase-2-isoform-X2-[Lates-calcarifer]	XP_027748293.1-receptor-interacting-serine/threonine-protein-kinase-2-isoform-X1-[Empidonax-traillii]	XP_009319084.1-PREDICTED:-receptor-interacting-serine/threonine-protein-kinase-2-like-isoform-X1-[Pygoscelis-adeliae]	XP_023688953.1-receptor-interacting-serine/threonine-protein-kinase-4-isoform-X2-[Paramormyrops-kingsleyae]	XP_052431520.1-ankyrin-repeat-and-protein-kinase-domain-containing-protein-1-isoform-X2-[Carassius-gibelio]	XP_032101063.1-caspase-2-isoform-X2-[Sapajus-apella]	XP_006756305.1-PREDICTED:-caspase-8-[Myotis-davidii]	XP_014737213.1-PREDICTED:-caspase-9-isoform-X1-[Sturnus-vulgaris]	XP_056390096.1-caspase-10-[Hyla-sarda]	XP_023042083.1-FAS-associated-death-domain-protein-[Piliocolobus-tephrosceles]	XP_034853032.1-TIR-domain-containing-adapter-molecule-1-[Mirounga-leonina]	XP_041039717.1-nucleotide-binding-oligomerization-domain-containing-protein-1-like-[Carcharodon-carcharias]	XP_052584341.1-nucleotide-binding-oligomerization-domain-containing-protein-2-isoform-X4-[Peromyscus-californicus-insignis]	XP_048409197.1-interferon-regulatory-factor-6-[Stegostoma-tigrinum]
XP_025726028.1-receptor-interacting-serine/threonine-protein-kinase-3-[Callorhinus-ursinus]	XP_050981698.1-eukaryotic-translation-initiation-factor-2-alpha-kinase-3-like-[Labeo-rohita]	XP_032985084.1-mixed-lineage-kinase-domain-like-protein-isoform-X4-[Rhinolophus-ferrumequinum]	XP_002816403.1-receptor-interacting-serine/threonine-protein-kinase-1-isoform-X2-[Pongo-abelii]	XP_012320512.1-receptor-interacting-serine/threonine-protein-kinase-2-[Aotus-nancymaae]	XP_041513802.1-receptor-interacting-serine/threonine-protein-kinase-2-isoform-X3-[Microtus-oregoni]	XP_009676554.1-PREDICTED:-receptor-interacting-serine/threonine-protein-kinase-2-like-[Struthio-camelus-australis]	XP_030331927.1-receptor-interacting-serine/threonine-protein-kinase-4-isoform-X1-[Strigops-habroptila]	XP_029062881.1-ankyrin-repeat-and-protein-kinase-domain-containing-protein-1-[Monodon-monoceros]	XP_051577400.1-caspase-2-isoform-X2-[Myxocyprinus-asiaticus]	XP_017916423.1-PREDICTED:-caspase-8-isoform-X2-[Capra-hircus]	XP_056364291.1-caspase-9-[Oenanthe-melanoleuca]	XP_036109895.1-caspase-10-isoform-X1-[Molossus-molossus]	XP_051633119.1-FAS-associated-death-domain-protein-[Manacus-candei]	XP_034611013.1-TIR-domain-containing-adapter-molecule-1-[Trachemys-scripta-elegans]	XP_038652769.1-nucleotide-binding-oligomerization-domain-containing-protein-1-like-isoform-X2-[Scyliorhinus-canicula]	XP_061243146.1-nucleotide-binding-oligomerization-domain-containing-protein-2-isoform-X6-[Bos-javanicus]	XP_041051929.1-interferon-regulatory-factor-6-[Carcharodon-carcharias]
XP_045553050.1-receptor-interacting-serine/threonine-protein-kinase-3-like-isoform-X2-[Salmo-salar]	XP_057359272.1-LOW-QUALITY-PROTEIN:-Z-DNA-binding-protein-1-[Manis-pentadactyla]	XP_036131824.1-mixed-lineage-kinase-domain-like-protein-isoform-X4-[Molossus-molossus]	XP_015812288.1-PREDICTED:-receptor-interacting-serine/threonine-protein-kinase-1-[Nothobranchius-furzeri]	XP_014911483.1-PREDICTED:-receptor-interacting-serine/threonine-protein-kinase-2-isoform-X2-[Poecilia-latipinna]	XP_034743719.1-receptor-interacting-serine/threonine-protein-kinase-2-like-[Etheostoma-cragini]	XP_009467503.1-PREDICTED:-receptor-interacting-serine/threonine-protein-kinase-2-like-[Nipponia-nippon]	XP_046295109.1-receptor-interacting-serine/threonine-protein-kinase-4-[Marmota-monax]	XP_039526404.1-ankyrin-repeat-and-protein-kinase-domain-containing-protein-1-isoform-X2-[Pimephales-promelas]	XP_014189997.1-caspase-2-isoform-X5-[Haplochromis-burtoni]	XP_027633379.1-caspase-8-isoform-X3-[Falco-peregrinus]	XP_042635901.1-LOW-QUALITY-PROTEIN:-caspase-9-[Catharus-ustulatus]	XP_055068331.1-caspase-8-like-isoform-X5-[Misgurnus-anguillicaudatus]	XP_024605032.1-FAS-associated-death-domain-protein-[Neophocaena-asiaeorientalis-asiaeorientalis]	XP_032321748.1-TIR-domain-containing-adapter-molecule-1-[Camelus-ferus]	XP_038652765.1-nucleotide-binding-oligomerization-domain-containing-protein-1-like-isoform-X1-[Scyliorhinus-canicula]	XP_061243143.1-nucleotide-binding-oligomerization-domain-containing-protein-2-isoform-X3-[Bos-javanicus] (2)	XP_038675771.1-LOW-QUALITY-PROTEIN:-interferon-regulatory-factor-6-like-[Scyliorhinus-canicula]
XP_035530861.1-receptor-interacting-serine/threonine-protein-kinase-3-isoform-X2-[Morone-saxatilis]	XP_045431019.1-Z-DNA-binding-protein-1-[Pipistrellus-kuhlii]	XP_053522692.1-mixed-lineage-kinase-domain-like-protein-isoform-X5-[Artibeus-jamaicensis]	XP_023126238.1-receptor-interacting-serine/threonine-protein-kinase-1-isoform-X1-[Amphiprion-ocellaris]	XP_033960131.1-receptor-interacting-serine/threonine-protein-kinase-2-[Pseudochaenichthys-georgianus]	XP_003760287.1-receptor-interacting-serine/threonine-protein-kinase-2-isoform-X1-[Sarcophilus-harrisii]	XP_010120319.1-PREDICTED:-receptor-interacting-serine/threonine-protein-kinase-2-like-[Chlamydotis-macqueenii]	XP_009677877.1-PREDICTED:-receptor-interacting-serine/threonine-protein-kinase-4-[Struthio-camelus-australis]	XP_052553322.1-ankyrin-repeat-and-protein-kinase-domain-containing-protein-1-[Tympanuchus-pallidicinctus]	XP_006910518.1-caspase-2-[Pteropus-alecto]	XP_044888403.1-caspase-8-like-isoform-X1-[Mauremys-mutica]	XP_021389475.1-caspase-9-[Lonchura-striata-domestica]	XP_004577327.1-caspase-10-[Ochotona-princeps]	XP_012892905.1-PREDICTED:-FAS-associated-death-domain-protein-like,-partial-[Dipodomys-ordii]	XP_060796494.1-TIR-domain-containing-adapter-molecule-1-[Neoarius-graeffei]	XP_048419822.1-nucleotide-binding-oligomerization-domain-containing-protein-1-like-[Stegostoma-tigrinum]	XP_061243145.1-nucleotide-binding-oligomerization-domain-containing-protein-2-isoform-X5-[Bos-javanicus]	XP_057702941.1-interferon-regulatory-factor-6-isoform-X2-[Corythoichthys-intestinalis]
XP_031678680.1-receptor-interacting-serine/threonine-protein-kinase-3-isoform-X2-[Oncorhynchus-kisutch]	XP_036179092.1-Z-DNA-binding-protein-1-isoform-X4-[Myotis-myotis]	XP_055269117.1-mixed-lineage-kinase-domain-like-protein-isoform-X4-[Moschus-berezovskii]	XP_024104535.1-receptor-interacting-serine/threonine-protein-kinase-1-isoform-X4-[Pongo-abelii]	XP_041103082.1-receptor-interacting-serine/threonine-protein-kinase-2-like-isoform-X2-[Polyodon-spathula]	XP_041513800.1-receptor-interacting-serine/threonine-protein-kinase-2-isoform-X1-[Microtus-oregoni]	XP_047934598.1-receptor-interacting-serine/threonine-protein-kinase-2-like-isoform-X3-[Anser-cygnoides]	XP_003419025.1-LOW-QUALITY-PROTEIN:-receptor-interacting-serine/threonine-protein-kinase-4-[Loxodonta-africana]	XP_026152390.1-ankyrin-repeat-and-protein-kinase-domain-containing-protein-1-[Mastacembelus-armatus]	XP_022056853.2-caspase-2-isoform-X2-[Acanthochromis-polyacanthus]	XP_050196261.1-caspase-8-like-[Myiozetetes-cayanensis]	XP_041576276.1-caspase-9-isoform-X2-[Taeniopygia-guttata]	XP_045662439.1-caspase-10-isoform-X1-[Ursus-americanus]	XP_024295667.1-FAS-associated-death-domain-protein-[Oncorhynchus-tshawytscha]	XP_019819974.1-PREDICTED:-TIR-domain-containing-adapter-molecule-1-[Bos-indicus]	XP_043575214.1-nucleotide-binding-oligomerization-domain-containing-protein-1-like-[Chiloscyllium-plagiosum]	XP_061243144.1-nucleotide-binding-oligomerization-domain-containing-protein-2-isoform-X4-[Bos-javanicus]	XP_012683086.1-interferon-regulatory-factor-6-[Clupea-harengus]
XP_039637318.1-receptor-interacting-serine/threonine-protein-kinase-4-like-[Perca-fluviatilis]	XP_036179090.1-Z-DNA-binding-protein-1-isoform-X2-[Myotis-myotis]	XP_031536688.1-mixed-lineage-kinase-domain-like-protein-isoform-X3-[Vicugna-pacos]	XP_023283018.1-receptor-interacting-serine/threonine-protein-kinase-1-isoform-X3-[Seriola-lalandi-dorsalis]	XP_010311982.1-PREDICTED:-receptor-interacting-serine/threonine-protein-kinase-2-like-[Balearica-regulorum-gibbericeps]	XP_039383339.1-receptor-interacting-serine/threonine-protein-kinase-2-[Mauremys-reevesii]	XP_039209776.1-receptor-interacting-serine/threonine-protein-kinase-2-like-[Crotalus-tigris]	XP_029069498.1-receptor-interacting-serine/threonine-protein-kinase-4-isoform-X1-[Monodon-monoceros]	XP_021488985.1-ankyrin-repeat-and-protein-kinase-domain-containing-protein-1-isoform-X2-[Meriones-unguiculatus]	XP_026226348.1-caspase-2-isoform-X8-[Anabas-testudineus]	XP_023366216.1-caspase-8-isoform-X2-[Otolemur-garnettii]	XP_041576275.1-caspase-9-isoform-X1-[Taeniopygia-guttata]	XP_018581451.1-caspase-8-like-[Scleropages-formosus]	XP_009686694.1-PREDICTED:-FAS-associated-death-domain-protein-[Struthio-camelus-australis]	XP_039672689.1-TIR-domain-containing-adapter-molecule-1-[Perca-fluviatilis]	XP_060705979.1-nucleotide-binding-oligomerization-domain-containing-protein-1-like-isoform-X2-[Hemiscyllium-ocellatum] (2)	XP_061243140.1-nucleotide-binding-oligomerization-domain-containing-protein-2-isoform-X1-[Bos-javanicus]	XP_041944738.1-interferon-regulatory-factor-6-[Alosa-sapidissima]
XP_011474514.1-receptor-interacting-serine/threonine-protein-kinase-3-isoform-X1-[Oryzias-latipes]	XP_023615212.1-Z-DNA-binding-protein-1-[Myotis-lucifugus]	XP_045360945.1-mixed-lineage-kinase-domain-like-protein-isoform-X3-[Camelus-bactrianus]	XP_017352960.1-receptor-interacting-serine/threonine-protein-kinase-1-isoform-X2-[Cebus-imitator]	XP_003760287.1-receptor-interacting-serine/threonine-protein-kinase-2-isoform-X1-[Sarcophilus-harrisii]	XP_006008577.1-PREDICTED:-receptor-interacting-serine/threonine-protein-kinase-2-isoform-X1-[Latimeria-chalumnae]	XP_020661398.1-receptor-interacting-serine/threonine-protein-kinase-2-like-isoform-X1-[Pogona-vitticeps]	XP_036706536.1-receptor-interacting-serine/threonine-protein-kinase-4-isoform-X4-[Balaenoptera-musculus]	XP_036932588.1-ankyrin-repeat-and-protein-kinase-domain-containing-protein-1-[Acanthopagrus-latus]	XP_043935791.1-caspase-2-isoform-X1-[Protopterus-annectens]	XP_019794695.1-caspase-8-isoform-X1-[Tursiops-truncatus]	XP_053819036.1-caspase-9-[Vidua-chalybeata]	XP_013856885.1-PREDICTED:-caspase-8-like-[Austrofundulus-limnaeus]	XP_034536743.1-FAS-associated-death-domain-protein-[Notolabrus-celidotus]	XP_024601823.1-TIR-domain-containing-adapter-molecule-1-[Neophocaena-asiaeorientalis-asiaeorientalis]	XP_060705978.1-nucleotide-binding-oligomerization-domain-containing-protein-1-like-isoform-X1-[Hemiscyllium-ocellatum] (2)	XP_057348663.1-LOW-QUALITY-PROTEIN:-nucleotide-binding-oligomerization-domain-containing-protein-2-[Manis-pentadactyla]	XP_053340003.1-interferon-regulatory-factor-6-[Clarias-gariepinus]
XP_015446198.1-receptor-interacting-serine/threonine-protein-kinase-3-isoform-X3-[Pteropus-alecto]	XP_036179091.1-Z-DNA-binding-protein-1-isoform-X3-[Myotis-myotis]	XP_032342630.1-mixed-lineage-kinase-domain-like-protein-isoform-X3-[Camelus-ferus]	XP_030259865.1-receptor-interacting-serine/threonine-protein-kinase-1-[Sparus-aurata]	XP_015994164.2-receptor-interacting-serine/threonine-protein-kinase-2-isoform-X1-[Rousettus-aegyptiacus]	XP_040849492.1-receptor-interacting-serine/threonine-protein-kinase-2-isoform-X1-[Ochotona-curzoniae]	XP_046202233.1-receptor-interacting-serine/threonine-protein-kinase-2-like-isoform-X2-[Oncorhynchus-gorbuscha]	XP_019288271.1-PREDICTED:-receptor-interacting-serine/threonine-protein-kinase-4-[Panthera-pardus]	XP_034610795.1-ankyrin-repeat-and-protein-kinase-domain-containing-protein-1-[Trachemys-scripta-elegans]	XP_054582316.1-caspase-2-isoform-X2-[Eptesicus-fuscus]	XP_032866696.1-caspase-8-[Tyto-alba]	XP_053853776.1-caspase-9-[Vidua-macroura]	XP_046263263.1-caspase-8-[Scatophagus-argus]	XP_030689094.1-FAS-associated-death-domain-protein-isoform-X2-[Globicephala-melas]	XP_037132722.1-TIR-domain-containing-adapter-molecule-1-[Syngnathus-acus]	XP_038652764.1-nucleotide-binding-oligomerization-domain-containing-protein-1-like-isoform-X2-[Scyliorhinus-canicula]	XP_036857354.1-LOW-QUALITY-PROTEIN:-nucleotide-binding-oligomerization-domain-containing-protein-2-[Manis-javanica] (2)	XP_060766539.1-interferon-regulatory-factor-6-[Neoarius-graeffei]
XP_006144637.1-receptor-interacting-serine/threonine-protein-kinase-3-isoform-X1-[Tupaia-chinensis]	XP_004620259.2-Z-DNA-binding-protein-1-[Sorex-araneus]	XP_031313938.1-mixed-lineage-kinase-domain-like-protein-isoform-X3-[Camelus-dromedarius]	XP_034284963.1-receptor-interacting-serine/threonine-protein-kinase-1-isoform-X1-[Pantherophis-guttatus]	XP_040210528.1-receptor-interacting-serine/threonine-protein-kinase-2-isoform-X1-[Rana-temporaria]	XP_007901388.1-receptor-interacting-serine/threonine-protein-kinase-2-[Callorhinchus-milii]	XP_041883377.1-receptor-interacting-serine/threonine-protein-kinase-2-like-[Corvus-kubaryi]	XP_042724189.1-receptor-interacting-serine/threonine-protein-kinase-4-[Lagopus-leucura]	XP_033061470.1-LOW-QUALITY-PROTEIN:-ankyrin-repeat-and-protein-kinase-domain-containing-protein-1-[Trachypithecus-francoisi]	XP_040858025.1-caspase-2-isoform-X1-[Ochotona-curzoniae]	XP_021105895.1-caspase-8-isoform-X2-[Heterocephalus-glaber]	XP_026654181.1-caspase-9-isoform-X2-[Zonotrichia-albicollis]	XP_007190566.2-caspase-10-isoform-X1-[Balaenoptera-acutorostrata]	XP_010292225.1-PREDICTED:-FAS-associated-death-domain-protein-[Phaethon-lepturus]	XP_031948309.1-TIR-domain-containing-adapter-molecule-1-[Corvus-moneduloides]	XP_038652763.1-nucleotide-binding-oligomerization-domain-containing-protein-1-like-isoform-X1-[Scyliorhinus-canicula] (2)	XP_015428127.1-PREDICTED:-nucleotide-binding-oligomerization-domain-containing-protein-2-[Myotis-davidii]	XP_053508748.1-interferon-regulatory-factor-6-[Ictalurus-furcatus]
XP_018086820.1-receptor-interacting-serine/threonine-protein-kinase-2-isoform-X1-[Xenopus-laevis]	XP_055963438.1-Z-DNA-binding-protein-1-[Sorex-cinereus]	XP_006152704.1-mixed-lineage-kinase-domain-like-protein-isoform-X3-[Tupaia-chinensis]	XP_045353536.1-receptor-interacting-serine/threonine-protein-kinase-1-[Leopardus-geoffroyi]	XP_049603732.1-receptor-interacting-serine/threonine-protein-kinase-2-like-isoform-X1-[Syngnathus-scovelli]	XP_007554908.1-PREDICTED:-receptor-interacting-serine/threonine-protein-kinase-2-isoform-X3-[Poecilia-formosa]	XP_009275018.1-PREDICTED:-receptor-interacting-serine/threonine-protein-kinase-2-isoform-X1-[Aptenodytes-forsteri]	XP_047463929.1-receptor-interacting-serine/threonine-protein-kinase-4-[Mugil-cephalus]	NP_848605.1-ankyrin-repeat-and-protein-kinase-domain-containing-protein-1-[Homo-sapiens]	XP_036184375.1-caspase-2-isoform-X10-[Myotis-myotis]	XP_041259720.1-caspase-8-like-[Onychostruthus-taczanowskii]	XP_014128778.1-caspase-9-isoform-X1-[Zonotrichia-albicollis]	XP_004871686.1-caspase-10-[Heterocephalus-glaber]	XP_023362522.1-FAS-associated-death-domain-protein-[Sarcophilus-harrisii]	XP_038284952.1-TIR-domain-containing-adapter-molecule-1-isoform-X1-[Canis-lupus-familiaris]	XP_043575220.1-nucleotide-binding-oligomerization-domain-containing-protein-1-like-isoform-X3-[Chiloscyllium-plagiosum]	XP_014383884.1-PREDICTED:-nucleotide-binding-oligomerization-domain-containing-protein-2-[Myotis-brandtii]	XP_017352110.2-interferon-regulatory-factor-6-isoform-X2-[Ictalurus-punctatus]
XP_027128992.1-ankyrin-repeat-and-protein-kinase-domain-containing-protein-1-isoform-X2-[Larimichthys-crocea]	XP_012583593.1-PREDICTED:-Z-DNA-binding-protein-1-[Condylura-cristata] (2)	XP_037672091.1-mixed-lineage-kinase-domain-like-protein-isoform-X4-[Choloepus-didactylus]	XP_025925630.1-receptor-interacting-serine/threonine-protein-kinase-1-isoform-X1-[Apteryx-rowi]	XP_035269817.1-receptor-interacting-serine/threonine-protein-kinase-2-isoform-X3-[Anguilla-anguilla]	XP_042780245.1-receptor-interacting-serine/threonine-protein-kinase-2-[Panthera-leo]	XP_039930889.1-receptor-interacting-serine/threonine-protein-kinase-2-like-isoform-X2-[Hirundo-rustica]	XP_007430294.1-receptor-interacting-serine/threonine-protein-kinase-4-[Python-bivittatus]	XP_032977264.1-ankyrin-repeat-and-protein-kinase-domain-containing-protein-1-isoform-X1-[Rhinolophus-ferrumequinum]	XP_030327699.1-caspase-2-isoform-X2-[Strigops-habroptila]	XP_017400780.1-caspase-8-isoform-X3-[Cebus-imitator]	XP_057895499.1-caspase-9-isoform-X1-[Melospiza-georgiana]	XP_040980285.1-caspase-10-isoform-X3-[Aquila-chrysaetos-chrysaetos]	XP_053369231.1-protein-FADD-[Clarias-gariepinus]	XP_019368973.1-PREDICTED:-TIR-domain-containing-adapter-molecule-1-[Gavialis-gangeticus]	XP_043575219.1-nucleotide-binding-oligomerization-domain-containing-protein-1-like-isoform-X2-[Chiloscyllium-plagiosum] (2)	XP_036297136.1-nucleotide-binding-oligomerization-domain-containing-protein-2-[Pipistrellus-kuhlii]	XP_027012471.2-interferon-regulatory-factor-6-[Tachysurus-fulvidraco]
XP_006144638.1-receptor-interacting-serine/threonine-protein-kinase-3-isoform-X3-[Tupaia-chinensis]	XP_006839373.1-PREDICTED:-z-DNA-binding-protein-1-[Chrysochloris-asiatica]	XP_008532331.1-PREDICTED:-mixed-lineage-kinase-domain-like-protein-isoform-X3-[Equus-przewalskii]	XP_033010364.1-receptor-interacting-serine/threonine-protein-kinase-1-[Lacerta-agilis]	XP_015680052.1-receptor-interacting-serine/threonine-protein-kinase-2-[Protobothrops-mucrosquamatus]	XP_008825832.1-receptor-interacting-serine/threonine-protein-kinase-2-isoform-X1-[Nannospalax-galili]	XP_032051845.1-receptor-interacting-serine/threonine-protein-kinase-2-like-isoform-X2-[Aythya-fuligula]	XP_032248539.1-receptor-interacting-serine/threonine-protein-kinase-4-[Phoca-vitulina]	XP_019063772.1-ankyrin-repeat-and-protein-kinase-domain-containing-protein-1-isoform-X2-[Fukomys-damarensis]	XP_030681816.1-caspase-2-isoform-X2-[Nomascus-leucogenys]	XP_040418389.1-caspase-8-[Cygnus-olor]	XP_054150477.1-caspase-9-isoform-X1-[Melozone-crissalis]	XP_033869604.2-caspase-8-like-[Acipenser-ruthenus]	XP_055146173.1-caspase-10-isoform-X6-[Symphalangus-syndactylus]	XP_051666436.1-TIR-domain-containing-adapter-molecule-1-[Manacus-candei]	XP_043575218.1-nucleotide-binding-oligomerization-domain-containing-protein-1-like-isoform-X1-[Chiloscyllium-plagiosum] (2)	XP_036202003.1-nucleotide-binding-oligomerization-domain-containing-protein-2-isoform-X8-[Myotis-myotis]	XP_060714653.1-interferon-regulatory-factor-6-[Tachysurus-vachellii]
XP_007984517.2-receptor-interacting-serine/threonine-protein-kinase-3-[Chlorocebus-sabaeus]	XP_045152840.1-Z-DNA-binding-protein-1-[Echinops-telfairi]	NP_001135969.1-mixed-lineage-kinase-domain-like-protein-isoform-2-[Homo-sapiens]	XP_030017291.1-receptor-interacting-serine/threonine-protein-kinase-1-isoform-X1-[Sphaeramia-orbicularis]	XP_005526489.2-PREDICTED:-receptor-interacting-serine/threonine-protein-kinase-2-like-[Pseudopodoces-humilis]	XP_032876061.1-receptor-interacting-serine/threonine-protein-kinase-2-isoform-X1-[Amblyraja-radiata]	XP_031665183.1-receptor-interacting-serine/threonine-protein-kinase-2-isoform-X3-[Oncorhynchus-kisutch]	XP_042543301.1-receptor-interacting-serine/threonine-protein-kinase-4-[Dipodomys-spectabilis]	XP_017665015.1-PREDICTED:-ankyrin-repeat-and-protein-kinase-domain-containing-protein-1-[Lepidothrix-coronata]	XP_048196351.1-caspase-2-isoform-X3-[Perognathus-longimembris-pacificus]	XP_006889145.1-PREDICTED:-caspase-8-isoform-X2-[Elephantulus-edwardii]	XP_036252291.1-caspase-9-[Molothrus-ater]	XP_055072201.1-caspase-8-like-[Misgurnus-anguillicaudatus]	XP_004278184.1-FAS-associated-death-domain-protein-isoform-X1-[Orcinus-orca]	XP_027759422.1-TIR-domain-containing-adapter-molecule-1-[Empidonax-traillii]	XP_059497027.1-LOW-QUALITY-PROTEIN:-nucleotide-binding-oligomerization-domain-containing-protein-1-like-[Stegostoma-tigrinum] (2)	XP_036202006.1-nucleotide-binding-oligomerization-domain-containing-protein-2-isoform-X10-[Myotis-myotis]	XP_046731203.1-interferon-regulatory-factor-6-[Silurus-meridionalis]
XP_048373782.1-receptor-interacting-serine/threonine-protein-kinase-3-isoform-X1-[Sphaerodactylus-townsendi]	XP_006896978.1-PREDICTED:-z-DNA-binding-protein-1-[Elephantulus-edwardii]	XP_054104474.1-LOW-QUALITY-PROTEIN:-mixed-lineage-kinase-domain-like-protein-[Callithrix-jacchus]	XP_005869690.1-PREDICTED:-receptor-interacting-serine/threonine-protein-kinase-1-[Myotis-brandtii]	XP_009477637.1-PREDICTED:-receptor-interacting-serine/threonine-protein-kinase-2-like-[Pelecanus-crispus]	XP_012670811.1-receptor-interacting-serine/threonine-protein-kinase-2-[Clupea-harengus]	XP_023790497.1-receptor-interacting-serine/threonine-protein-kinase-2-like-isoform-X1-[Cyanistes-caeruleus]	XP_022537213.2-receptor-interacting-serine/threonine-protein-kinase-4-isoform-X1-[Astyanax-mexicanus]	XP_049582903.1-ankyrin-repeat-and-protein-kinase-domain-containing-protein-1-[Syngnathus-scovelli]	XP_036285001.1-caspase-2-isoform-X1-[Pipistrellus-kuhlii]	XP_023074580.1-caspase-8-isoform-X1-[Piliocolobus-tephrosceles]	XP_054503723.1-caspase-9-[Agelaius-phoeniceus]	NP_001193453.1-caspase-10-isoform-6-preproprotein-[Homo-sapiens]	XP_049653613.1-death-domain-containing-protein-CRADD-like-[Accipiter-gentilis]	XP_008280479.1-PREDICTED:-TIR-domain-containing-adapter-molecule-1-like-isoform-X1-[Stegastes-partitus]	XP_048465925.1-nucleotide-binding-oligomerization-domain-containing-protein-1-like-isoform-X1-[Rhincodon-typus]	XP_055153669.1-nucleotide-binding-oligomerization-domain-containing-protein-2-isoform-X1-[Symphalangus-syndactylus] (2)	XP_058230269.1-interferon-regulatory-factor-6-[Hemibagrus-wyckioides]
XP_006061519.1-receptor-interacting-serine/threonine-protein-kinase-3-isoform-X2-[Bubalus-bubalis]	XP_030069358.1-Z-DNA-binding-protein-1-[Microcaecilia-unicolor]	XP_030781188.1-mixed-lineage-kinase-domain-like-protein-isoform-X3-[Rhinopithecus-roxellana]	XP_017573120.2-receptor-interacting-serine/threonine-protein-kinase-1-[Pygocentrus-nattereri]	XP_036378452.1-receptor-interacting-serine/threonine-protein-kinase-2-[Megalops-cyprinoides]	XP_032543002.1-receptor-interacting-serine/threonine-protein-kinase-2-isoform-X1-[Chiroxiphia-lanceolata]	XP_050167259.1-receptor-interacting-serine/threonine-protein-kinase-2-like-[Myiozetetes-cayanensis]	XP_039913210.1-receptor-interacting-serine/threonine-protein-kinase-4-isoform-X1-[Hirundo-rustica]	XP_040338971.1-ankyrin-repeat-and-protein-kinase-domain-containing-protein-1-isoform-X2-[Puma-yagouaroundi]	XP_023965847.2-caspase-2-isoform-X3-[Chrysemys-picta-bellii]	XP_011997867.1-caspase-8-isoform-X1-[Ovis-aries]	XP_038015939.1-caspase-9-[Motacilla-alba-alba]	XP_041752486.2-caspase-8-[Coregonus-clupeaformis]	XP_054335063.1-caspase-10-isoform-X4-[Pongo-pygmaeus]	XP_025312834.1-TIR-domain-containing-adapter-molecule-1-[Canis-lupus-dingo]	XP_007887856.2-nucleotide-binding-oligomerization-domain-containing-protein-1-[Callorhinchus-milii]	XP_055153670.1-nucleotide-binding-oligomerization-domain-containing-protein-2-isoform-X2-[Symphalangus-syndactylus]	XP_034170198.1-interferon-regulatory-factor-6-[Pangasianodon-hypophthalmus]
XP_033781247.1-receptor-interacting-serine/threonine-protein-kinase-3-isoform-X1-[Geotrypetes-seraphini]	XP_033770234.1-Z-DNA-binding-protein-1-isoform-X7-[Geotrypetes-seraphini]	XP_047289664.1-mixed-lineage-kinase-domain-like-protein-isoform-X6-[Homo-sapiens]	XP_041698200.1-receptor-interacting-serine/threonine-protein-kinase-1-[Coregonus-clupeaformis]	XP_010084155.1-PREDICTED:-receptor-interacting-serine/threonine-protein-kinase-2-like-[Pterocles-gutturalis]	XP_010707419.2-receptor-interacting-serine/threonine-protein-kinase-2,-partial-[Meleagris-gallopavo]	XP_034151626.1-receptor-interacting-serine/threonine-protein-kinase-2-isoform-X2-[Esox-lucius]	XP_025908841.1-receptor-interacting-serine/threonine-protein-kinase-4-[Nothoprocta-perdicaria]	XP_030600796.1-ankyrin-repeat-and-protein-kinase-domain-containing-protein-1-[Archocentrus-centrarchus]	XP_054637669.1-caspase-2-isoform-X3-[Dunckerocampus-dactyliophorus]	XP_052605493.1-caspase-8-[Peromyscus-californicus-insignis]	XP_018780228.3-caspase-9-isoform-X1-[Serinus-canaria]	XP_016342968.1-PREDICTED:-caspase-8-like-isoform-X1-[Sinocyclocheilus-anshuiensis]	XP_016041775.1-PREDICTED:-FAS-associated-death-domain-protein-[Erinaceus-europaeus]	XP_061457141.1-TIR-domain-containing-adapter-molecule-1-[Rhineura-floridana]	XP_059508766.1-nucleotide-binding-oligomerization-domain-containing-protein-1-isoform-X2-[Stegostoma-tigrinum] (2)	XP_032013213.1-nucleotide-binding-oligomerization-domain-containing-protein-2-[Hylobates-moloch] (2)	XP_026888170.1-interferon-regulatory-factor-6-isoform-X2-[Electrophorus-electricus]
XP_025247503.1-receptor-interacting-serine/threonine-protein-kinase-3-[Theropithecus-gelada]	XP_033770232.1-Z-DNA-binding-protein-1-isoform-X5-[Geotrypetes-seraphini]	XP_047289661.1-mixed-lineage-kinase-domain-like-protein-isoform-X3-[Homo-sapiens]	XP_029498691.1-receptor-interacting-serine/threonine-protein-kinase-1-like-[Oncorhynchus-nerka]	XP_010582952.1-PREDICTED:-receptor-interacting-serine/threonine-protein-kinase-2-like-[Haliaeetus-leucocephalus]	XP_028592407.1-receptor-interacting-serine/threonine-protein-kinase-2-[Podarcis-muralis]	XP_038825869.1-receptor-interacting-serine/threonine-protein-kinase-2-like-isoform-X2-[Salvelinus-namaycush]	XP_042314927.1-receptor-interacting-serine/threonine-protein-kinase-4-[Sceloporus-undulatus]	XP_036180300.1-ankyrin-repeat-and-protein-kinase-domain-containing-protein-1-isoform-X2-[Myotis-myotis]	XP_055065567.1-caspase-2-isoform-X1-[Misgurnus-anguillicaudatus]	XP_042730418.1-caspase-8-isoform-X4-[Lagopus-leucura]	XP_050838669.1-caspase-9-isoform-X2-[Serinus-canaria]	XP_038643840.1-caspase-8-like-isoform-X2-[Scyliorhinus-canicula]	XP_049573463.1-protein-FADD-isoform-X3-[Syngnathus-scovelli]	XP_010177190.1-PREDICTED:-TIR-domain-containing-adapter-molecule-1-[Mesitornis-unicolor]	XP_059508757.1-nucleotide-binding-oligomerization-domain-containing-protein-1-isoform-X1-[Stegostoma-tigrinum] (2)	XP_012360135.2-nucleotide-binding-oligomerization-domain-containing-protein-2-isoform-X2-[Nomascus-leucogenys]	XP_026888169.1-interferon-regulatory-factor-6-isoform-X1-[Electrophorus-electricus]
XP_031593152.1-receptor-interacting-serine/threonine-protein-kinase-3-like-isoform-X2-[Oreochromis-aureus]	XP_033770228.1-Z-DNA-binding-protein-1-isoform-X2-[Geotrypetes-seraphini]	XP_011521238.1-mixed-lineage-kinase-domain-like-protein-isoform-X7-[Homo-sapiens]	XP_040840023.1-receptor-interacting-serine/threonine-protein-kinase-1-like-isoform-X3-[Ochotona-curzoniae]	XP_041100329.1-receptor-interacting-serine/threonine-protein-kinase-2-like-[Polyodon-spathula]	XP_023776841.1-receptor-interacting-serine/threonine-protein-kinase-2-[Cyanistes-caeruleus]	XP_032623623.1-receptor-interacting-serine/threonine-protein-kinase-2-like-[Chelonoidis-abingdonii]	XP_008285505.1-PREDICTED:-receptor-interacting-serine/threonine-protein-kinase-4-[Stegastes-partitus]	XP_011363729.1-ankyrin-repeat-and-protein-kinase-domain-containing-protein-1-[Pteropus-vampyrus]	XP_054582319.1-caspase-2-isoform-X5-[Eptesicus-fuscus]	XP_033086608.1-caspase-8-isoform-X1-[Trachypithecus-francoisi]	XP_030819661.1-caspase-9-[Camarhynchus-parvulus]	XP_014445039.1-caspase-10-isoform-X2-[Tupaia-chinensis]	XP_055470653.1-FAS-associated-death-domain-protein-[Psammomys-obesus]	XP_009511631.1-PREDICTED:-TIR-domain-containing-adapter-molecule-1-[Phalacrocorax-carbo]	XP_060706064.1-nucleotide-binding-oligomerization-domain-containing-protein-1-[Hemiscyllium-ocellatum]	XP_030678950.1-nucleotide-binding-oligomerization-domain-containing-protein-2-isoform-X3-[Nomascus-leucogenys]	XP_049327779.1-interferon-regulatory-factor-6-[Astyanax-mexicanus]
XP_032337664.1-receptor-interacting-serine/threonine-protein-kinase-3-isoform-X2-[Camelus-ferus]	XP_033770227.1-Z-DNA-binding-protein-1-isoform-X1-[Geotrypetes-seraphini]	XP_010348928.1-mixed-lineage-kinase-domain-like-protein-isoform-X1-[Saimiri-boliviensis-boliviensis]	XP_030408167.1-receptor-interacting-serine/threonine-protein-kinase-1-isoform-X1-[Gopherus-evgoodei]	XP_043833808.1-receptor-interacting-serine/threonine-protein-kinase-2-isoform-X2-[Dromiciops-gliroides]	XP_017275637.1-receptor-interacting-serine/threonine-protein-kinase-2-[Kryptolebias-marmoratus]	XP_010002729.1-PREDICTED:-receptor-interacting-serine/threonine-protein-kinase-2-like-[Chaetura-pelagica]	XP_039633413.1-receptor-interacting-serine/threonine-protein-kinase-4-isoform-X3-[Perca-fluviatilis]	XP_005856972.1-PREDICTED:-ankyrin-repeat-and-protein-kinase-domain-containing-protein-1-[Myotis-brandtii]	XP_026576458.1-caspase-2-isoform-X1-[Pseudonaja-textilis]	XP_052532310.1-caspase-8-like-[Tympanuchus-pallidicinctus]	XP_041319402.1-caspase-9-[Pyrgilauda-ruficollis]	XP_026233046.1-caspase-8-isoform-X2-[Anabas-testudineus]	XP_039546923.1-protein-FADD-isoform-X2-[Pimephales-promelas]	XP_008332072.1-TIR-domain-containing-adapter-molecule-1-like-[Cynoglossus-semilaevis]	XP_043575224.1-nucleotide-binding-oligomerization-domain-containing-protein-1-isoform-X3-[Chiloscyllium-plagiosum]	XP_003263091.2-nucleotide-binding-oligomerization-domain-containing-protein-2-isoform-X1-[Nomascus-leucogenys] (2)	XP_036415465.1-LOW-QUALITY-PROTEIN:-interferon-regulatory-factor-6-[Colossoma-macropomum]
XP_020442500.1-receptor-interacting-serine/threonine-protein-kinase-3-like-isoform-X1-[Monopterus-albus]	XP_033770233.1-Z-DNA-binding-protein-1-isoform-X6-[Geotrypetes-seraphini]	XP_010348933.1-mixed-lineage-kinase-domain-like-protein-isoform-X2-[Saimiri-boliviensis-boliviensis]	XP_014889872.1-PREDICTED:-receptor-interacting-serine/threonine-protein-kinase-1-[Poecilia-latipinna]	XP_029560063.1-receptor-interacting-serine/threonine-protein-kinase-2-like-[Salmo-trutta]	XP_048276261.1-receptor-interacting-serine/threonine-protein-kinase-2-isoform-X1-[Myodes-glareolus]	XP_041742834.2-receptor-interacting-serine/threonine-protein-kinase-2-isoform-X1-[Coregonus-clupeaformis]	XP_011482106.1-receptor-interacting-serine/threonine-protein-kinase-4-[Oryzias-latipes]	XP_035535378.1-ankyrin-repeat-and-protein-kinase-domain-containing-protein-1-[Morone-saxatilis]	XP_009946982.1-PREDICTED:-caspase-2-[Leptosomus-discolor]	XP_047401951.1-caspase-8-isoform-X2-[Sciurus-carolinensis]	XP_041275507.1-caspase-9-isoform-X2-[Onychostruthus-taczanowskii]	XP_022349230.1-caspase-10-[Enhydra-lutris-kenyoni]	XP_005278790.1-FAS-associated-death-domain-protein-[Chrysemys-picta-bellii]	XP_058584350.1-TIR-domain-containing-adapter-molecule-1-isoform-X1-[Neofelis-nebulosa]	XP_043575223.1-nucleotide-binding-oligomerization-domain-containing-protein-1-isoform-X2-[Chiloscyllium-plagiosum]	XP_024089547.2-nucleotide-binding-oligomerization-domain-containing-protein-2-isoform-X1-[Pongo-abelii]	XP_037388442.1-interferon-regulatory-factor-6-isoform-X1-[Pygocentrus-nattereri]
XP_033961940.1-receptor-interacting-serine/threonine-protein-kinase-3-[Pseudochaenichthys-georgianus]	XP_033770229.1-Z-DNA-binding-protein-1-isoform-X3-[Geotrypetes-seraphini]	XP_012292951.1-mixed-lineage-kinase-domain-like-protein-[Aotus-nancymaae]	XP_029418730.1-receptor-interacting-serine/threonine-protein-kinase-1-isoform-X2-[Nannospalax-galili]	XP_021543898.1-receptor-interacting-serine/threonine-protein-kinase-2-isoform-X1-[Neomonachus-schauinslandi]	XP_006157610.1-receptor-interacting-serine/threonine-protein-kinase-2-isoform-X1-[Tupaia-chinensis]	XP_015223873.1-PREDICTED:-receptor-interacting-serine/threonine-protein-kinase-2-like-isoform-X2-[Lepisosteus-oculatus]	XP_004561695.1-receptor-interacting-serine/threonine-protein-kinase-4-[Maylandia-zebra]	XP_048683114.1-LOW-QUALITY-PROTEIN:-ankyrin-repeat-and-protein-kinase-domain-containing-protein-1-[Caretta-caretta]	XP_038140382.1-caspase-2-isoform-X3-[Cyprinodon-tularosa]	XP_053838202.1-caspase-8-like-isoform-X1-[Vidua-macroura]	XP_041275506.1-caspase-9-isoform-X1-[Onychostruthus-taczanowskii]	XP_008068977.1-caspase-10-[Carlito-syrichta]	XP_027008822.1-protein-FADD-[Tachysurus-fulvidraco]	XP_053754549.1-LOW-QUALITY-PROTEIN:-TIR-domain-containing-adapter-molecule-1-[Panthera-pardus]	XP_043575221.1-nucleotide-binding-oligomerization-domain-containing-protein-1-isoform-X1-[Chiloscyllium-plagiosum] (2)	XP_002826462.4-nucleotide-binding-oligomerization-domain-containing-protein-2-isoform-X2-[Pongo-abelii] (2)	XP_017544192.2-interferon-regulatory-factor-6-isoform-X2-[Pygocentrus-nattereri]
XP_039726332.1-receptor-interacting-serine/threonine-protein-kinase-3-isoform-X1-[Pteropus-giganteus]	XP_033770231.1-Z-DNA-binding-protein-1-isoform-X4-[Geotrypetes-seraphini]	XP_017386044.1-mixed-lineage-kinase-domain-like-protein-[Cebus-imitator]	XP_039377330.1-receptor-interacting-serine/threonine-protein-kinase-1-isoform-X3-[Mauremys-reevesii]	XP_027593154.1-receptor-interacting-serine/threonine-protein-kinase-2-[Pipra-filicauda]	XP_012665267.1-receptor-interacting-serine/threonine-protein-kinase-2-isoform-X3-[Otolemur-garnettii]	XP_009477637.1-PREDICTED:-receptor-interacting-serine/threonine-protein-kinase-2-like-[Pelecanus-crispus]	XP_046717947.1-receptor-interacting-serine/threonine-protein-kinase-4-[Silurus-meridionalis]	XP_033832970.1-ankyrin-repeat-and-protein-kinase-domain-containing-protein-1-[Periophthalmus-magnuspinnatus]	XP_057689310.1-caspase-2-isoform-X1-[Corythoichthys-intestinalis]	XP_036865066.1-caspase-8-isoform-X2-[Manis-javanica]	XP_039559101.1-caspase-9-isoform-X2-[Passer-montanus]	XP_056913101.1-caspase-8-[Takifugu-flavidus]	XP_036717422.1-FAS-associated-death-domain-protein-isoform-X3-[Balaenoptera-musculus]	XP_037361028.1-TIR-domain-containing-adapter-molecule-1-[Talpa-occidentalis]	XP_041040842.1-nucleotide-binding-oligomerization-domain-containing-protein-1-[Carcharodon-carcharias] (2)	NP_001280486.1-nucleotide-binding-oligomerization-domain-containing-protein-2-isoform-2-[Homo-sapiens] (2)	XP_016146092.1-PREDICTED:-interferon-regulatory-factor-6-like-[Sinocyclocheilus-grahami]
XP_007561766.1-PREDICTED:-receptor-interacting-serine/threonine-protein-kinase-3-like-isoform-X2-[Poecilia-formosa]	XP_033770235.1-Z-DNA-binding-protein-1-isoform-X8-[Geotrypetes-seraphini]	XP_032140324.1-mixed-lineage-kinase-domain-like-protein-[Sapajus-apella]	XP_024408089.1-receptor-interacting-serine/threonine-protein-kinase-1-isoform-X2-[Desmodus-rotundus]	XP_011792465.1-PREDICTED:-receptor-interacting-serine/threonine-protein-kinase-2-[Colobus-angolensis-palliatus]	XP_039551553.1-receptor-interacting-serine/threonine-protein-kinase-2-isoform-X1-[Passer-montanus]	XP_009981064.1-PREDICTED:-receptor-interacting-serine/threonine-protein-kinase-2-like-[Tauraco-erythrolophus]	XP_031712785.1-receptor-interacting-serine/threonine-protein-kinase-4-isoform-X2-[Anarrhichthys-ocellatus]	XP_019899233.2-ankyrin-repeat-and-protein-kinase-domain-containing-protein-1-isoform-X2-[Esox-lucius]	XP_010779926.1-PREDICTED:-caspase-2-like,-partial-[Notothenia-coriiceps]	XP_022349077.1-caspase-8-isoform-X2-[Enhydra-lutris-kenyoni]	XP_039559100.1-caspase-9-isoform-X1-[Passer-montanus]	XP_006120134.1-caspase-10-like-isoform-X1-[Pelodiscus-sinensis]	XP_039696527.1-FAS-associated-death-domain-protein-[Pteropus-giganteus]	XP_032989627.1-TIR-domain-containing-adapter-molecule-1-[Rhinolophus-ferrumequinum]	XP_038652762.1-nucleotide-binding-oligomerization-domain-containing-protein-1-isoform-X6-[Scyliorhinus-canicula] (2)	XP_006721305.1-nucleotide-binding-oligomerization-domain-containing-protein-2-isoform-X1-[Homo-sapiens]	XP_030633083.1-interferon-regulatory-factor-6-[Chanos-chanos]
XP_034267447.1-receptor-interacting-serine/threonine-protein-kinase-3-[Pantherophis-guttatus]	XP_038606317.1-Z-DNA-binding-protein-1-isoform-X3-[Tachyglossus-aculeatus]	XP_037863969.1-mixed-lineage-kinase-domain-like-protein-[Chlorocebus-sabaeus]	XP_044223417.1-receptor-interacting-serine/threonine-protein-kinase-1-isoform-X3-[Thunnus-albacares]	XP_039517185.1-receptor-interacting-serine/threonine-protein-kinase-2-[Pimephales-promelas]	XP_022610507.1-receptor-interacting-serine/threonine-protein-kinase-2-isoform-X1-[Seriola-dumerili]	XP_006258224.2-PREDICTED:-receptor-interacting-serine/threonine-protein-kinase-2-[Alligator-mississippiensis]	XP_048721924.1-receptor-interacting-serine/threonine-protein-kinase-4-[Caretta-caretta]	XP_041734716.2-ankyrin-repeat-and-protein-kinase-domain-containing-protein-1-like-isoform-X1-[Coregonus-clupeaformis]	XP_011376371.1-caspase-2-[Pteropus-vampyrus]	XP_056390066.1-caspase-8-like-[Hyla-sarda]	XP_041871802.1-caspase-9-isoform-X3-[Corvus-kubaryi]	XP_005995476.1-PREDICTED:-caspase-8-like-[Latimeria-chalumnae]	XP_037696038.1-FAS-associated-death-domain-protein-isoform-X1-[Choloepus-didactylus]	XP_051894303.1-TIR-domain-containing-adapter-molecule-1-[Pristis-pectinata]	XP_038652757.1-nucleotide-binding-oligomerization-domain-containing-protein-1-isoform-X2-[Scyliorhinus-canicula] (2)	NP_071445.1-nucleotide-binding-oligomerization-domain-containing-protein-2-isoform-1-[Homo-sapiens] (2)	XP_051979468.1-interferon-regulatory-factor-6-like-[Xyrauchen-texanus]
XP_041429380.1-receptor-interacting-serine/threonine-protein-kinase-4-isoform-X4-[Xenopus-laevis]	XP_038606318.1-Z-DNA-binding-protein-1-isoform-X4-[Tachyglossus-aculeatus]	XP_011756363.1-mixed-lineage-kinase-domain-like-protein-[Macaca-nemestrina]	XP_047590920.1-receptor-interacting-serine/threonine-protein-kinase-1-like-[Lutra-lutra]	XP_010707419.2-receptor-interacting-serine/threonine-protein-kinase-2,-partial-[Meleagris-gallopavo]	XP_026654544.1-receptor-interacting-serine/threonine-protein-kinase-2-isoform-X2-[Zonotrichia-albicollis]	XP_023851075.1-receptor-interacting-serine/threonine-protein-kinase-2-like-isoform-X2-[Salvelinus-alpinus]	XP_019118993.1-receptor-interacting-serine/threonine-protein-kinase-4-[Larimichthys-crocea]	XP_021488984.1-ankyrin-repeat-and-protein-kinase-domain-containing-protein-1-isoform-X1-[Meriones-unguiculatus]	XP_006997216.1-caspase-2-[Peromyscus-maniculatus-bairdii]	XP_054492399.1-caspase-8-like-isoform-X2-[Agelaius-phoeniceus]	XP_041871800.1-caspase-9-isoform-X1-[Corvus-kubaryi]	XP_039999898.1-caspase-8-isoform-X1-[Xiphias-gladius]	XP_004627165.2-FAS-associated-death-domain-protein-[Octodon-degus]	XP_016362910.1-PREDICTED:-TIR-domain-containing-adapter-molecule-1-like-[Sinocyclocheilus-anshuiensis]	XP_038652760.1-nucleotide-binding-oligomerization-domain-containing-protein-1-isoform-X5-[Scyliorhinus-canicula] (2)	XP_006721306.1-nucleotide-binding-oligomerization-domain-containing-protein-2-isoform-X5-[Homo-sapiens]	XP_051549484.1-interferon-regulatory-factor-6-like-[Myxocyprinus-asiaticus]
XP_051501717.1-receptor-interacting-serine/threonine-protein-kinase-3-isoform-X1-[Myxocyprinus-asiaticus]	XP_038606314.1-Z-DNA-binding-protein-1-isoform-X1-[Tachyglossus-aculeatus]	XP_023058220.1-mixed-lineage-kinase-domain-like-protein-isoform-X1-[Piliocolobus-tephrosceles]	XP_049998169.1-receptor-interacting-serine/threonine-protein-kinase-1-[Microtus-fortis]	XP_026561789.1-receptor-interacting-serine/threonine-protein-kinase-2-[Pseudonaja-textilis]	XP_034470669.1-receptor-interacting-serine/threonine-protein-kinase-2-like-isoform-X6-[Hippoglossus-hippoglossus]	XP_005233546.3-receptor-interacting-serine/threonine-protein-kinase-2-like-isoform-X1-[Falco-peregrinus]	XP_030217892.1-receptor-interacting-serine/threonine-protein-kinase-4-isoform-X1-[Gadus-morhua]	XP_018081442.1-ankyrin-repeat-and-protein-kinase-domain-containing-protein-1-isoform-X2-[Xenopus-laevis]	XP_049749997.1-caspase-2-isoform-X1-[Elephas-maximus-indicus]	XP_037768407.1-caspase-8-isoform-X2-[Chelonia-mydas]	XP_048182347.1-caspase-9-isoform-X3-[Corvus-hawaiiensis]	XP_010711743.1-caspase-10-[Meleagris-gallopavo]	XP_016339447.1-PREDICTED:-FAS-associated-death-domain-protein-like-[Sinocyclocheilus-anshuiensis]	XP_049732433.1-TIR-domain-containing-adapter-molecule-1-[Elephas-maximus-indicus]	XP_038652758.1-nucleotide-binding-oligomerization-domain-containing-protein-1-isoform-X3-[Scyliorhinus-canicula] (2)	XP_018866958.2-nucleotide-binding-oligomerization-domain-containing-protein-2-isoform-X1-[Gorilla-gorilla-gorilla] (2)	XP_051977595.1-interferon-regulatory-factor-6-like-[Xyrauchen-texanus]
XP_039678586.1-receptor-interacting-serine/threonine-protein-kinase-3-isoform-X2-[Perca-fluviatilis]	XP_038606315.1-Z-DNA-binding-protein-1-isoform-X2-[Tachyglossus-aculeatus]	XP_023058222.1-mixed-lineage-kinase-domain-like-protein-isoform-X2-[Piliocolobus-tephrosceles]	XP_042662861.1-receptor-interacting-serine/threonine-protein-kinase-1-[Tyto-alba]	XP_021111625.1-receptor-interacting-serine/threonine-protein-kinase-2-[Heterocephalus-glaber]	XP_026792815.1-receptor-interacting-serine/threonine-protein-kinase-2-[Pangasianodon-hypophthalmus]	XP_015223871.1-PREDICTED:-receptor-interacting-serine/threonine-protein-kinase-2-like-isoform-X1-[Lepisosteus-oculatus]	XP_033833905.1-receptor-interacting-serine/threonine-protein-kinase-4-[Periophthalmus-magnuspinnatus]	XP_006936699.3-ankyrin-repeat-and-protein-kinase-domain-containing-protein-1-[Felis-catus]	NP_001215.1-caspase-2-isoform-2-[Homo-sapiens]	NP_001038154.1-initiator-caspase-[Gallus-gallus]	XP_031987479.1-caspase-9-isoform-X3-[Corvus-moneduloides]	XP_036401140.1-caspase-8-like-isoform-X1-[Megalops-cyprinoides]	XP_020796306.1-protein-FADD-[Boleophthalmus-pectinirostris]	XP_025028501.1-TIR-domain-containing-adapter-molecule-1-isoform-X1-[Python-bivittatus]	XP_038652755.1-nucleotide-binding-oligomerization-domain-containing-protein-1-isoform-X1-[Scyliorhinus-canicula] (2)	XP_004057684.3-nucleotide-binding-oligomerization-domain-containing-protein-2-isoform-X2-[Gorilla-gorilla-gorilla] (2)	XP_051551194.1-interferon-regulatory-factor-6-like-isoform-X1-[Myxocyprinus-asiaticus]
XP_048827662.1-receptor-interacting-serine/threonine-protein-kinase-4-isoform-X2-[Brienomyrus-brachyistius]	XP_028927206.1-Z-DNA-binding-protein-1-isoform-X3-[Ornithorhynchus-anatinus]	XP_030781187.1-mixed-lineage-kinase-domain-like-protein-isoform-X2-[Rhinopithecus-roxellana]	XP_009567788.1-PREDICTED:-receptor-interacting-serine/threonine-protein-kinase-1-[Cuculus-canorus]	XP_041268603.1-receptor-interacting-serine/threonine-protein-kinase-2-isoform-X1-[Onychostruthus-taczanowskii]	XP_030347171.1-receptor-interacting-serine/threonine-protein-kinase-2-isoform-X1-[Strigops-habroptila]	XP_035754758.1-receptor-interacting-serine/threonine-protein-kinase-2-isoform-X1-[Egretta-garzetta]	XP_027816500.2-receptor-interacting-serine/threonine-protein-kinase-4-[Ovis-aries]	XP_051053337.1-ankyrin-repeat-and-protein-kinase-domain-containing-protein-1-[Phodopus-roborovskii]	XP_041758687.1-caspase-2-[Coregonus-clupeaformis]	XP_050772778.1-caspase-8-like-isoform-X2-[Gopherus-flavomarginatus]	XP_041871801.1-caspase-9-isoform-X2-[Corvus-kubaryi]	XP_009086338.2-caspase-10-[Serinus-canaria]	XP_003798427.1-FAS-associated-death-domain-protein-[Otolemur-garnettii]	XP_043837127.1-TIR-domain-containing-adapter-molecule-1-[Dromiciops-gliroides]	XP_038652759.1-nucleotide-binding-oligomerization-domain-containing-protein-1-isoform-X4-[Scyliorhinus-canicula]	XP_054523957.1-nucleotide-binding-oligomerization-domain-containing-protein-2-isoform-X2-[Pan-troglodytes] (2)	XP_051551195.1-interferon-regulatory-factor-6-like-isoform-X2-[Myxocyprinus-asiaticus]
XP_038225683.1-receptor-interacting-serine/threonine-protein-kinase-3-isoform-X3-[Dermochelys-coriacea]	XP_028927205.1-Z-DNA-binding-protein-1-isoform-X2-[Ornithorhynchus-anatinus]	XP_010381260.1-mixed-lineage-kinase-domain-like-protein-isoform-X4-[Rhinopithecus-roxellana]	XP_021071117.1-receptor-interacting-serine/threonine-protein-kinase-1-[Mus-pahari]	XP_014911482.1-PREDICTED:-receptor-interacting-serine/threonine-protein-kinase-2-isoform-X1-[Poecilia-latipinna]	XP_039096520.1-receptor-interacting-serine/threonine-protein-kinase-2-isoform-X1-[Hyaena-hyaena]	XP_041124266.1-receptor-interacting-serine/threonine-protein-kinase-2-like-[Polyodon-spathula]	XP_039713563.1-receptor-interacting-serine/threonine-protein-kinase-4-isoform-X1-[Pteropus-giganteus]	XP_013042657.2-ankyrin-repeat-and-protein-kinase-domain-containing-protein-1-[Anser-cygnoides]	XP_019789420.2-caspase-2-isoform-X1-[Tursiops-truncatus]	XP_054685971.1-caspase-8-like-isoform-X1-[Grus-americana]	XP_039419997.1-caspase-9-isoform-X3-[Corvus-cornix-cornix]	XP_044769312.1-caspase-10-[Neomonachus-schauinslandi]	XP_047402597.1-caspase-10-isoform-X4-[Sciurus-carolinensis]	XP_040595166.1-TIR-domain-containing-adapter-molecule-1-[Mesocricetus-auratus]	XP_055507099.1-nucleotide-binding-oligomerization-domain-containing-protein-1-isoform-X1-[Leucoraja-erinacea] (2)	NP_001098710.2-nucleotide-binding-oligomerization-domain-containing-protein-2-[Pan-troglodytes]	XP_055073452.1-interferon-regulatory-factor-6-[Misgurnus-anguillicaudatus]
XP_051555317.1-receptor-interacting-serine/threonine-protein-kinase-3-like-isoform-X3-[Myxocyprinus-asiaticus]	XP_007669611.1-Z-DNA-binding-protein-1-isoform-X1-[Ornithorhynchus-anatinus]	XP_030781186.1-mixed-lineage-kinase-domain-like-protein-isoform-X1-[Rhinopithecus-roxellana]	XP_023283016.1-receptor-interacting-serine/threonine-protein-kinase-1-isoform-X1-[Seriola-lalandi-dorsalis]	XP_036905219.1-receptor-interacting-serine/threonine-protein-kinase-2-[Sturnira-hondurensis]	XP_005499518.2-receptor-interacting-serine/threonine-protein-kinase-2,-partial-[Columba-livia]	XP_023856837.1-receptor-interacting-serine/threonine-protein-kinase-2-isoform-X2-[Salvelinus-alpinus]	XP_036451076.1-LOW-QUALITY-PROTEIN:-receptor-interacting-serine/threonine-protein-kinase-4-[Colossoma-macropomum]	XP_035647406.1-ankyrin-repeat-and-protein-kinase-domain-containing-protein-1-[Oncorhynchus-keta]	XP_043117763.1-caspase-2-isoform-X2-[Puntigrus-tetrazona]	XP_032655345.1-caspase-8-isoform-X2-[Chelonoidis-abingdonii]	XP_031987478.1-caspase-9-isoform-X2-[Corvus-moneduloides]	XP_032066192.1-caspase-10-like-isoform-X1-[Thamnophis-elegans]	XP_032138413.1-FAS-associated-death-domain-protein-[Sapajus-apella]	XP_018109628.1-TIR-domain-containing-adapter-molecule-1-[Xenopus-laevis]	XP_032872703.1-nucleotide-binding-oligomerization-domain-containing-protein-1-like-isoform-X2-[Amblyraja-radiata] (2)	XP_003819863.1-nucleotide-binding-oligomerization-domain-containing-protein-2-isoform-X3-[Pan-paniscus]	XP_057182305.1-interferon-regulatory-factor-6-[Triplophysa-rosa]
XP_015820139.1-PREDICTED:-receptor-interacting-serine/threonine-protein-kinase-3-like-isoform-X1-[Nothobranchius-furzeri]	XP_019340041.1-PREDICTED:-Z-DNA-binding-protein-1-isoform-X1-[Alligator-mississippiensis]	XP_017724198.1-PREDICTED:-mixed-lineage-kinase-domain-like-protein-[Rhinopithecus-bieti]	XP_032105965.1-receptor-interacting-serine/threonine-protein-kinase-1-isoform-X1-[Sapajus-apella]	XP_042184511.1-receptor-interacting-serine/threonine-protein-kinase-2-isoform-X3-[Oncorhynchus-tshawytscha]	XP_045698139.1-receptor-interacting-serine/threonine-protein-kinase-2-isoform-X2-[Phyllostomus-hastatus]	XP_042708247.1-receptor-interacting-serine/threonine-protein-kinase-2-like-isoform-X2-[Chrysemys-picta-bellii]	XP_042355597.1-receptor-interacting-serine/threonine-protein-kinase-4-[Plectropomus-leopardus]	XP_043435298.1-ankyrin-repeat-and-protein-kinase-domain-containing-protein-1-[Prionailurus-bengalensis]	XP_013207931.1-caspase-2-isoform-X2-[Microtus-ochrogaster]	XP_025749211.1-caspase-8-[Callorhinus-ursinus]	XP_048182346.1-caspase-9-isoform-X2-[Corvus-hawaiiensis]	XP_037705902.1-caspase-10-[Choloepus-didactylus]	XP_008280374.1-PREDICTED:-FAS-associated-death-domain-protein-[Stegastes-partitus]	XP_044990545.1-TIR-domain-containing-adapter-molecule-1-isoform-X1-[Jaculus-jaculus]	XP_032872690.1-nucleotide-binding-oligomerization-domain-containing-protein-1-like-isoform-X1-[Amblyraja-radiata]	XP_014197239.1-nucleotide-binding-oligomerization-domain-containing-protein-2-isoform-X1-[Pan-paniscus]	XP_056614752.1-interferon-regulatory-factor-6-[Triplophysa-dalaica]
XP_014352600.1-PREDICTED:-proline-rich-receptor-like-protein-kinase-PERK5-[Latimeria-chalumnae]	XP_019340042.1-PREDICTED:-Z-DNA-binding-protein-1-isoform-X2-[Alligator-mississippiensis]	XP_033074898.1-mixed-lineage-kinase-domain-like-protein-isoform-X2-[Trachypithecus-francoisi]	XP_024594211.1-receptor-interacting-serine/threonine-protein-kinase-1-[Neophocaena-asiaeorientalis-asiaeorientalis]	XP_040265803.1-receptor-interacting-serine/threonine-protein-kinase-2-like-isoform-X2-[Bufo-bufo]	XP_020825744.1-receptor-interacting-serine/threonine-protein-kinase-2-[Phascolarctos-cinereus]	XP_041446066.1-receptor-interacting-serine/threonine-protein-kinase-2-like-isoform-X1-[Xenopus-laevis]	XP_036203096.1-receptor-interacting-serine/threonine-protein-kinase-4-isoform-X1-[Myotis-myotis]	XP_017378786.1-ankyrin-repeat-and-protein-kinase-domain-containing-protein-1-isoform-X2-[Cebus-imitator]	XP_029928919.1-caspase-2-isoform-X2-[Myripristis-murdjan]	XP_029789934.1-caspase-8-isoform-X1-[Suricata-suricatta]	XP_039419996.1-caspase-9-isoform-X2-[Corvus-cornix-cornix]	XP_020452109.1-caspase-8-like-isoform-X2-[Monopterus-albus]	XP_036731742.1-FAS-associated-death-domain-protein-[Manis-pentadactyla]	XP_008431969.1-PREDICTED:-TIR-domain-containing-adapter-molecule-1-like-[Poecilia-reticulata]	XP_051872680.1-nucleotide-binding-oligomerization-domain-containing-protein-1-like-[Pristis-pectinata]	XP_016783954.2-nucleotide-binding-oligomerization-domain-containing-protein-2-isoform-X1-[Pan-troglodytes]	XP_016354722.1-PREDICTED:-interferon-regulatory-factor-6-like-[Sinocyclocheilus-anshuiensis]
XP_003458818.2-receptor-interacting-serine/threonine-protein-kinase-3-[Oreochromis-niloticus]	XP_025060484.1-Z-DNA-binding-protein-1-isoform-X2-[Alligator-sinensis]	XP_033074897.1-mixed-lineage-kinase-domain-like-protein-isoform-X1-[Trachypithecus-francoisi]	XP_028369236.1-receptor-interacting-serine/threonine-protein-kinase-1-isoform-X1-[Phyllostomus-discolor]	XP_021171291.2-receptor-interacting-serine/threonine-protein-kinase-2-isoform-X2-[Fundulus-heteroclitus]	XP_023581863.1-receptor-interacting-serine/threonine-protein-kinase-2-[Trichechus-manatus-latirostris]	XP_009973039.3-receptor-interacting-serine/threonine-protein-kinase-2-isoform-X2-[Tyto-alba]	XP_023045350.1-receptor-interacting-serine/threonine-protein-kinase-4-isoform-X1-[Piliocolobus-tephrosceles]	XP_022530819.2-ankyrin-repeat-and-protein-kinase-domain-containing-protein-1-[Astyanax-mexicanus]	XP_014840441.1-PREDICTED:-caspase-2-[Poecilia-mexicana]	XP_030435594.1-caspase-8-isoform-X2-[Gopherus-evgoodei]	XP_039419995.1-caspase-9-isoform-X1-[Corvus-cornix-cornix]	XP_053353333.1-caspase-8-isoform-X2-[Clarias-gariepinus]	XP_032494757.1-FAS-associated-death-domain-protein-[Phocoena-sinus]	XP_047564979.1-TIR-domain-containing-adapter-molecule-1-[Lutra-lutra]	XP_059801346.1-nucleotide-binding-oligomerization-domain-containing-protein-1-[Hypanus-sabinus] (2)	XP_030781290.1-nucleotide-binding-oligomerization-domain-containing-protein-2-isoform-X2-[Rhinopithecus-roxellana]	XP_059399041.1-interferon-regulatory-factor-6-like-[Carassius-carassius]
XP_027884191.1-receptor-interacting-serine/threonine-protein-kinase-3-like-isoform-X4-[Xiphophorus-couchianus]	XP_025060483.1-Z-DNA-binding-protein-1-isoform-X1-[Alligator-sinensis]	XP_014982110.1-mixed-lineage-kinase-domain-like-protein-isoform-X3-[Macaca-mulatta]	XP_012659684.1-receptor-interacting-serine/threonine-protein-kinase-1-[Otolemur-garnettii]	XP_015422883.1-PREDICTED:-receptor-interacting-serine/threonine-protein-kinase-2-[Myotis-davidii]	XP_015280335.1-PREDICTED:-receptor-interacting-serine/threonine-protein-kinase-2-[Gekko-japonicus]	XP_026569942.1-receptor-interacting-serine/threonine-protein-kinase-2-like-[Pseudonaja-textilis]	XP_051903782.1-receptor-interacting-serine/threonine-protein-kinase-4-[Hippocampus-zosterae]	XP_031200238.1-ankyrin-repeat-and-protein-kinase-domain-containing-protein-1-isoform-X1-[Mastomys-coucha]	XP_037691895.1-caspase-2-isoform-X2-[Choloepus-didactylus]	XP_051046228.1-caspase-8-[Phodopus-roborovskii]	XP_048182345.1-caspase-9-isoform-X1-[Corvus-hawaiiensis]	XP_020826467.1-caspase-10-isoform-X1-[Phascolarctos-cinereus]	XP_019784651.2-FAS-associated-death-domain-protein-isoform-X1-[Tursiops-truncatus]	XP_026102610.1-TIR-domain-containing-adapter-molecule-1-like-[Carassius-auratus]	XP_053570247.1-nucleotide-binding-oligomerization-domain-containing-protein-1-isoform-X2-[Bombina-bombina]	XP_017738461.1-PREDICTED:-nucleotide-binding-oligomerization-domain-containing-protein-2-isoform-X1-[Rhinopithecus-bieti]	XP_052394585.1-interferon-regulatory-factor-6-[Carassius-gibelio]
XP_034354151.1-receptor-interacting-serine/threonine-protein-kinase-3-[Arvicanthis-niloticus]	XP_019365741.1-PREDICTED:-Z-DNA-binding-protein-1-[Gavialis-gangeticus]	XP_015298625.1-PREDICTED:-mixed-lineage-kinase-domain-like-protein-isoform-X5-[Macaca-fascicularis]	XP_034148712.1-LOW-QUALITY-PROTEIN:-receptor-interacting-serine/threonine-protein-kinase-1-like-[Esox-lucius]	XP_042637966.1-receptor-interacting-serine/threonine-protein-kinase-2-[Orycteropus-afer-afer]	XP_050021399.1-receptor-interacting-serine/threonine-protein-kinase-2-isoform-X2-[Microtus-fortis]	XP_020333349.2-receptor-interacting-serine/threonine-protein-kinase-2-isoform-X1-[Oncorhynchus-kisutch]	XP_042287048.1-receptor-interacting-serine/threonine-protein-kinase-4-[Thunnus-maccoyii]	XP_009900645.1-PREDICTED:-ankyrin-repeat-and-protein-kinase-domain-containing-protein-1-[Dryobates-pubescens]	XP_026708361.1-caspase-2-isoform-X3-[Athene-cunicularia]	XP_031970186.1-caspase-8-like-[Corvus-moneduloides]	XP_031987476.1-caspase-9-isoform-X1-[Corvus-moneduloides]	XP_040458660.1-caspase-10-isoform-X4-[Falco-naumanni]	XP_004575639.1-FAS-associated-death-domain-protein-[Maylandia-zebra]	XP_040097958.1-TIR-domain-containing-adapter-molecule-1-[Oryx-dammah]	XP_053570246.1-nucleotide-binding-oligomerization-domain-containing-protein-1-isoform-X1-[Bombina-bombina]	XP_017738462.1-PREDICTED:-nucleotide-binding-oligomerization-domain-containing-protein-2-isoform-X2-[Rhinopithecus-bieti]	XP_026091319.1-interferon-regulatory-factor-6-like-[Carassius-auratus]
XP_038158032.1-receptor-interacting-serine/threonine-protein-kinase-3-isoform-X1-[Cyprinodon-tularosa]	XP_019403722.1-PREDICTED:-Z-DNA-binding-protein-1-[Crocodylus-porosus]	XP_015298622.1-PREDICTED:-mixed-lineage-kinase-domain-like-protein-isoform-X4-[Macaca-fascicularis]	XP_018419843.1-PREDICTED:-receptor-interacting-serine/threonine-protein-kinase-1-[Nanorana-parkeri]	XP_010349510.2-receptor-interacting-serine/threonine-protein-kinase-2-isoform-X2-[Saimiri-boliviensis-boliviensis]	XP_042353624.1-receptor-interacting-serine/threonine-protein-kinase-2-like-isoform-X1-[Plectropomus-leopardus]	XP_010582952.1-PREDICTED:-receptor-interacting-serine/threonine-protein-kinase-2-like-[Haliaeetus-leucocephalus]	XP_006870917.1-PREDICTED:-receptor-interacting-serine/threonine-protein-kinase-4-[Chrysochloris-asiatica]	XP_045653478.1-LOW-QUALITY-PROTEIN:-ankyrin-repeat-and-protein-kinase-domain-containing-protein-1-[Ursus-americanus]	XP_026041392.1-caspase-2-isoform-X1-[Astatotilapia-calliptera]	XP_043381194.1-caspase-8-isoform-X2-[Chelonia-mydas]	XP_054031892.1-caspase-9-[Dryobates-pubescens]	XP_029567066.1-caspase-8-like-[Salmo-trutta]	XP_043887101.1-protein-FADD-[Solea-senegalensis]	XP_011798868.1-PREDICTED:-TIR-domain-containing-adapter-molecule-1-[Colobus-angolensis-palliatus]	XP_053324207.1-nucleotide-binding-oligomerization-domain-containing-protein-1-[Spea-bombifrons]	XP_030781288.1-nucleotide-binding-oligomerization-domain-containing-protein-2-isoform-X1-[Rhinopithecus-roxellana]	XP_043079681.1-interferon-regulatory-factor-6-like-[Puntigrus-tetrazona]
XP_040332408.1-receptor-interacting-serine/threonine-protein-kinase-3-[Puma-yagouaroundi]	XP_014430212.1-Z-DNA-binding-protein-1-isoform-X3-[Pelodiscus-sinensis]	XP_015298620.1-PREDICTED:-mixed-lineage-kinase-domain-like-protein-isoform-X2-[Macaca-fascicularis]	XP_026006456.1-receptor-interacting-serine/threonine-protein-kinase-1-isoform-X2-[Astatotilapia-calliptera]	XP_015495270.1-receptor-interacting-serine/threonine-protein-kinase-2-like-isoform-X2-[Parus-major]	XP_005150905.1-receptor-interacting-serine/threonine-protein-kinase-2-isoform-X1-[Melopsittacus-undulatus]	XP_028595384.1-receptor-interacting-serine/threonine-protein-kinase-2-like-[Podarcis-muralis]	XP_031712784.1-receptor-interacting-serine/threonine-protein-kinase-4-isoform-X1-[Anarrhichthys-ocellatus]	XP_026938078.1-ankyrin-repeat-and-protein-kinase-domain-containing-protein-1-isoform-X1-[Lagenorhynchus-obliquidens]	XP_007184745.2-caspase-2-isoform-X2-[Balaenoptera-acutorostrata]	XP_005904304.1-PREDICTED:-caspase-8-[Bos-mutus]	XP_054250924.1-caspase-9-[Indicator-indicator]	XP_003457507.2-caspase-8-[Oreochromis-niloticus]	XP_025734358.1-FAS-associated-death-domain-protein-[Callorhinus-ursinus]	XP_030653321.1-TIR-domain-containing-adapter-molecule-1-[Nomascus-leucogenys]	XP_002937900.2-nucleotide-binding-oligomerization-domain-containing-protein-1-[Xenopus-tropicalis] (2)	XP_010374683.1-nucleotide-binding-oligomerization-domain-containing-protein-2-isoform-X3-[Rhinopithecus-roxellana] (2)	XP_016308435.1-PREDICTED:-interferon-regulatory-factor-6-like-[Sinocyclocheilus-anshuiensis]
XP_033507918.1-receptor-interacting-serine/threonine-protein-kinase-3-[Epinephelus-lanceolatus]	XP_014430210.1-Z-DNA-binding-protein-1-isoform-X2-[Pelodiscus-sinensis]	XP_014982109.1-mixed-lineage-kinase-domain-like-protein-isoform-X2-[Macaca-mulatta]	XP_013767170.1-PREDICTED:-receptor-interacting-serine/threonine-protein-kinase-1-isoform-X1-[Pundamilia-nyererei]	XP_030437885.1-receptor-interacting-serine/threonine-protein-kinase-2-like-isoform-X2-[Gopherus-evgoodei]	XP_033993850.1-receptor-interacting-serine/threonine-protein-kinase-2-[Trematomus-bernacchii]	XP_044843695.1-receptor-interacting-serine/threonine-protein-kinase-2-like-isoform-X2-[Mauremys-mutica]	XP_046267278.1-receptor-interacting-serine/threonine-protein-kinase-4-[Scatophagus-argus]	XP_028275358.1-ankyrin-repeat-and-protein-kinase-domain-containing-protein-1-[Parambassis-ranga]	XP_010172681.1-caspase-2,-partial-[Antrostomus-carolinensis]	XP_032866699.2-caspase-8-isoform-X2-[Tyto-alba]	XP_054706042.1-caspase-9-[Grus-americana]	XP_028924108.1-caspase-10-like-isoform-X1-[Ornithorhynchus-anatinus]	XP_041315137.1-FAS-associated-death-domain-protein-[Pyrgilauda-ruficollis]	XP_059553075.1-TIR-domain-containing-adapter-molecule-1-[Myotis-daubentonii]	XP_018124808.1-nucleotide-binding-oligomerization-domain-containing-protein-1-[Xenopus-laevis]	XP_030781293.1-nucleotide-binding-oligomerization-domain-containing-protein-2-isoform-X6-[Rhinopithecus-roxellana]	XP_050959686.1-interferon-regulatory-factor-6-[Labeo-rohita]
XP_008310825.2-receptor-interacting-serine/threonine-protein-kinase-3-like-isoform-X1-[Cynoglossus-semilaevis]	XP_006125401.2-Z-DNA-binding-protein-1-isoform-X1-[Pelodiscus-sinensis]	XP_015298625.2-mixed-lineage-kinase-domain-like-protein-isoform-X3-[Macaca-fascicularis]	XP_016106259.1-PREDICTED:-receptor-interacting-serine/threonine-protein-kinase-1-[Sinocyclocheilus-grahami]	XP_003821196.1-receptor-interacting-serine/threonine-protein-kinase-2-isoform-X1-[Pan-paniscus]	XP_037856243.1-receptor-interacting-serine/threonine-protein-kinase-2-isoform-X4-[Chlorocebus-sabaeus]	XP_015495270.1-receptor-interacting-serine/threonine-protein-kinase-2-like-isoform-X2-[Parus-major]	XP_010833312.1-PREDICTED:-receptor-interacting-serine/threonine-protein-kinase-4-[Bison-bison-bison]	XP_036392969.1-ankyrin-repeat-and-protein-kinase-domain-containing-protein-1-[Megalops-cyprinoides]	XP_008320960.1-caspase-2-isoform-X1-[Cynoglossus-semilaevis]	XP_014120450.2-caspase-8-like-[Zonotrichia-albicollis]	XP_050765384.1-caspase-9-[Gymnogyps-californianus]	XP_057193417.1-caspase-8-like-isoform-X2-[Triplophysa-rosa]	XP_006270568.1-PREDICTED:-FAS-associated-death-domain-protein-[Alligator-mississippiensis]	XP_058393341.1-TIR-domain-containing-adapter-molecule-1-[Diceros-bicornis-minor]	XP_018418247.1-PREDICTED:-nucleotide-binding-oligomerization-domain-containing-protein-1-[Nanorana-parkeri]	XP_045237640.1-nucleotide-binding-oligomerization-domain-containing-protein-2-isoform-X5-[Macaca-fascicularis]	XP_042604613.1-interferon-regulatory-factor-6-[Cyprinus-carpio]
XP_029436846.1-receptor-interacting-serine/threonine-protein-kinase-3-isoform-X2-[Rhinatrema-bivittatum]	XP_038226430.1-Z-DNA-binding-protein-1-[Dermochelys-coriacea]	XP_014982106.1-mixed-lineage-kinase-domain-like-protein-isoform-X1-[Macaca-mulatta]	XP_044280501.1-receptor-interacting-serine/threonine-protein-kinase-1-isoform-X1-[Varanus-komodoensis]	XP_023373676.1-receptor-interacting-serine/threonine-protein-kinase-2-isoform-X2-[Otolemur-garnettii]	XP_010349510.2-receptor-interacting-serine/threonine-protein-kinase-2-isoform-X2-[Saimiri-boliviensis-boliviensis]	XP_038596526.1-receptor-interacting-serine/threonine-protein-kinase-2-like-isoform-X3-[Tachyglossus-aculeatus]	XP_040088077.1-receptor-interacting-serine/threonine-protein-kinase-4-[Oryx-dammah]	XP_009074344.1-PREDICTED:-ankyrin-repeat-and-protein-kinase-domain-containing-protein-1-[Acanthisitta-chloris]	XP_040021725.1-caspase-2-isoform-X7-[Gasterosteus-aculeatus-aculeatus]	XP_055465103.1-caspase-8-[Psammomys-obesus]	XP_014807537.1-PREDICTED:-caspase-9-isoform-X1-[Calidris-pugnax]	XP_037998292.1-caspase-8-like-[Motacilla-alba-alba]	XP_031148623.1-protein-FADD-[Sander-lucioperca]	XP_053869622.1-TIR-domain-containing-adapter-molecule-1-[Malaclemys-terrapin-pileata]	XP_040208987.1-nucleotide-binding-oligomerization-domain-containing-protein-1-isoform-X2-[Rana-temporaria] (2)	XP_011922095.1-PREDICTED:-nucleotide-binding-oligomerization-domain-containing-protein-2-isoform-X4-[Cercocebus-atys] (2)	XP_059424855.1-interferon-regulatory-factor-6-like-[Carassius-carassius]
XP_008277914.1-PREDICTED:-receptor-interacting-serine/threonine-protein-kinase-3-like-[Stegastes-partitus]	XP_048676339.1-Z-DNA-binding-protein-1-isoform-X1-[Caretta-caretta]	XP_009195114.2-mixed-lineage-kinase-domain-like-protein-isoform-X4-[Papio-anubis]	XP_004432220.1-PREDICTED:-receptor-interacting-serine/threonine-protein-kinase-1-[Ceratotherium-simum-simum]	XP_023790498.1-receptor-interacting-serine/threonine-protein-kinase-2-like-isoform-X2-[Cyanistes-caeruleus]	XP_042184512.1-receptor-interacting-serine/threonine-protein-kinase-2-isoform-X4-[Oncorhynchus-tshawytscha]	XP_048672883.1-receptor-interacting-serine/threonine-protein-kinase-2-like-isoform-X1-[Caretta-caretta]	XP_042665465.1-receptor-interacting-serine/threonine-protein-kinase-4-[Centrocercus-urophasianus]	XP_044933512.1-LOW-QUALITY-PROTEIN:-ankyrin-repeat-and-protein-kinase-domain-containing-protein-1-[Mustela-putorius-furo]	XP_006802967.1-caspase-2-isoform-X7-[Neolamprologus-brichardi]	XP_032715969.1-caspase-8-isoform-X1-[Lontra-canadensis]	XP_054078527.1-caspase-9-[Rissa-tridactyla]	XP_023837560.1-caspase-8-like-isoform-X2-[Salvelinus-alpinus]	XP_010174454.2-LOW-QUALITY-PROTEIN:-FAS-associated-death-domain-protein,-partial-[Antrostomus-carolinensis]	XP_009480176.1-PREDICTED:-TIR-domain-containing-adapter-molecule-1-[Pelecanus-crispus]	XP_040208986.1-nucleotide-binding-oligomerization-domain-containing-protein-1-isoform-X1-[Rana-temporaria]	XP_023065680.1-nucleotide-binding-oligomerization-domain-containing-protein-2-isoform-X2-[Piliocolobus-tephrosceles] (2)	XP_052446068.1-interferon-regulatory-factor-6-like-[Carassius-gibelio]
XP_024136688.1-receptor-interacting-serine/threonine-protein-kinase-3-isoform-X3-[Oryzias-melastigma]	XP_048676340.1-Z-DNA-binding-protein-1-isoform-X2-[Caretta-caretta]	XP_011890229.1-PREDICTED:-mixed-lineage-kinase-domain-like-protein-isoform-X4-[Cercocebus-atys]	XP_037644311.1-receptor-interacting-serine/threonine-protein-kinase-1-[Sebastes-umbrosus]	XP_040402300.1-receptor-interacting-serine/threonine-protein-kinase-2-[Cygnus-olor]	XP_022357890.1-receptor-interacting-serine/threonine-protein-kinase-2-isoform-X2-[Enhydra-lutris-kenyoni]	XP_009945544.1-PREDICTED:-receptor-interacting-serine/threonine-protein-kinase-2-like-[Leptosomus-discolor]	XP_005740423.1-PREDICTED:-receptor-interacting-serine/threonine-protein-kinase-4-[Pundamilia-nyererei]	XP_023681757.1-ankyrin-repeat-and-protein-kinase-domain-containing-protein-1-[Paramormyrops-kingsleyae]	XP_014374157.1-caspase-2-isoform-X3-[Alligator-sinensis]	XP_047576680.1-caspase-8-isoform-X1-[Lutra-lutra]	XP_009323577.1-PREDICTED:-LOW-QUALITY-PROTEIN:-caspase-9-[Pygoscelis-adeliae]	XP_046319057.1-caspase-10-isoform-X1-[Marmota-monax]	XP_048710707.1-FAS-associated-death-domain-protein-[Caretta-caretta]	XP_046299981.1-TIR-domain-containing-adapter-molecule-1-isoform-X2-[Marmota-monax]	XP_056376673.1-nucleotide-binding-oligomerization-domain-containing-protein-1-isoform-X1-[Hyla-sarda]	XP_023065679.1-nucleotide-binding-oligomerization-domain-containing-protein-2-isoform-X1-[Piliocolobus-tephrosceles]	XP_026054436.1-interferon-regulatory-factor-6-like-[Carassius-auratus]
XP_030018651.1-receptor-interacting-serine/threonine-protein-kinase-3-like-[Sphaeramia-orbicularis]	XP_007059919.2-Z-DNA-binding-protein-1-isoform-X1-[Chelonia-mydas]	XP_011890147.1-PREDICTED:-mixed-lineage-kinase-domain-like-protein-isoform-X3-[Cercocebus-atys]	XP_024291579.1-receptor-interacting-serine/threonine-protein-kinase-1-[Oncorhynchus-tshawytscha]	XP_036193404.1-receptor-interacting-serine/threonine-protein-kinase-2-isoform-X3-[Myotis-myotis]	XP_034071380.1-receptor-interacting-serine/threonine-protein-kinase-2-[Gymnodraco-acuticeps]	XP_005504816.1-receptor-interacting-serine/threonine-protein-kinase-2-isoform-X1-[Columba-livia]	XP_041343722.1-receptor-interacting-serine/threonine-protein-kinase-4-[Pyrgilauda-ruficollis]	XP_021027809.1-ankyrin-repeat-and-protein-kinase-domain-containing-protein-1-isoform-X2-[Mus-caroli]	XP_035402009.1-caspase-2-isoform-X2-[Cygnus-atratus]	XP_006153098.1-caspase-8-isoform-X2-[Tupaia-chinensis]	XP_009288035.1-PREDICTED:-caspase-9-[Aptenodytes-forsteri]	XP_040005095.1-caspase-8-isoform-X2-[Xiphias-gladius]	XP_026338754.1-FAS-associated-death-domain-protein-[Ursus-arctos]	XP_016053353.1-PREDICTED:-TIR-domain-containing-adapter-molecule-1-[Miniopterus-natalensis]	XP_056376676.1-nucleotide-binding-oligomerization-domain-containing-protein-1-isoform-X2-[Hyla-sarda] (2)	XP_011802004.1-PREDICTED:-nucleotide-binding-oligomerization-domain-containing-protein-2-[Colobus-angolensis-palliatus]	XP_058616298.1-interferon-regulatory-factor-6-[Onychostoma-macrolepis]
XP_039726333.1-receptor-interacting-serine/threonine-protein-kinase-3-isoform-X2-[Pteropus-giganteus]	XP_037733006.1-Z-DNA-binding-protein-1-isoform-X2-[Chelonia-mydas]	XP_011890707.1-PREDICTED:-mixed-lineage-kinase-domain-like-protein-isoform-X5-[Cercocebus-atys]	XP_005239131.1-receptor-interacting-serine/threonine-protein-kinase-1-[Falco-peregrinus]	XP_021441653.2-receptor-interacting-serine/threonine-protein-kinase-2-isoform-X2-[Oncorhynchus-mykiss]	XP_028449852.1-receptor-interacting-serine/threonine-protein-kinase-2-isoform-X2-[Perca-flavescens]	XP_040265803.1-receptor-interacting-serine/threonine-protein-kinase-2-like-isoform-X2-[Bufo-bufo]	XP_004406614.1-PREDICTED:-receptor-interacting-serine/threonine-protein-kinase-4-[Odobenus-rosmarus-divergens]	XP_045002011.1-LOW-QUALITY-PROTEIN:-ankyrin-repeat-and-protein-kinase-domain-containing-protein-1-[Jaculus-jaculus]	XP_013360472.1-PREDICTED:-caspase-2-isoform-X3-[Chinchilla-lanigera]	XP_021105894.1-caspase-8-isoform-X1-[Heterocephalus-glaber]	XP_032842505.2-caspase-9-isoform-X1-[Tyto-alba]	XP_036713491.1-caspase-10-isoform-X3-[Balaenoptera-musculus]	XP_048215713.1-FAS-associated-death-domain-protein-[Perognathus-longimembris-pacificus]	XP_039589774.1-TIR-domain-containing-adapter-molecule-1-[Passer-montanus]	XP_040289394.1-nucleotide-binding-oligomerization-domain-containing-protein-1-like-isoform-X2-[Bufo-bufo]	XP_033074259.1-nucleotide-binding-oligomerization-domain-containing-protein-2-isoform-X2-[Trachypithecus-francoisi] (2)	XP_016371856.1-PREDICTED:-interferon-regulatory-factor-6-[Sinocyclocheilus-rhinocerous]
XP_035521046.1-receptor-interacting-serine/threonine-protein-kinase-3-like-[Morone-saxatilis]	XP_043383151.1-Z-DNA-binding-protein-1-isoform-X3-[Chelonia-mydas]	XP_009195113.2-mixed-lineage-kinase-domain-like-protein-isoform-X3-[Papio-anubis]	XP_028912305.1-receptor-interacting-serine/threonine-protein-kinase-1-like-isoform-X1-[Ornithorhynchus-anatinus]	XP_032543012.1-receptor-interacting-serine/threonine-protein-kinase-2-isoform-X2-[Chiroxiphia-lanceolata]	XP_043363575.1-receptor-interacting-serine/threonine-protein-kinase-2-isoform-X1-[Dermochelys-coriacea]	XP_021441653.2-receptor-interacting-serine/threonine-protein-kinase-2-isoform-X2-[Oncorhynchus-mykiss]	XP_032945226.1-receptor-interacting-serine/threonine-protein-kinase-4-isoform-X2-[Rhinolophus-ferrumequinum]	XP_016129070.1-PREDICTED:-ankyrin-repeat-and-protein-kinase-domain-containing-protein-1-like-[Sinocyclocheilus-grahami]	XP_054511224.1-caspase-2-isoform-X4-[Pan-troglodytes]	XP_013000680.1-caspase-8-[Cavia-porcellus]	XP_053941525.1-caspase-9-isoform-X1-[Cuculus-canorus]	XP_029315592.1-caspase-8-like-isoform-X2-[Cottoperca-gobio]	XP_048401570.1-protein-FADD-[Stegostoma-fasciatum]	XP_050177095.1-TIR-domain-containing-adapter-molecule-1-[Myiozetetes-cayanensis]	XP_040289389.1-nucleotide-binding-oligomerization-domain-containing-protein-1-like-isoform-X1-[Bufo-bufo] (2)	XP_033074261.1-nucleotide-binding-oligomerization-domain-containing-protein-2-isoform-X4-[Trachypithecus-francoisi]	XP_056303760.1-interferon-regulatory-factor-6-[Danio-aesculapii]
XP_031593151.1-receptor-interacting-serine/threonine-protein-kinase-3-like-isoform-X1-[Oreochromis-aureus]	XP_024057476.1-Z-DNA-binding-protein-1-[Terrapene-carolina-triunguis]	XP_003917222.2-mixed-lineage-kinase-domain-like-protein-isoform-X2-[Papio-anubis]	XP_033960830.1-receptor-interacting-serine/threonine-protein-kinase-1-[Pseudochaenichthys-georgianus] (3)	XP_037131383.1-receptor-interacting-serine/threonine-protein-kinase-2-like-isoform-X2-[Syngnathus-acus]	XP_013881213.1-PREDICTED:-receptor-interacting-serine/threonine-protein-kinase-2-isoform-X2-[Austrofundulus-limnaeus]	XP_027554008.1-receptor-interacting-serine/threonine-protein-kinase-2-like-[Neopelma-chrysocephalum]	XP_033002956.1-receptor-interacting-serine/threonine-protein-kinase-4-[Lacerta-agilis]	XP_011759661.1-LOW-QUALITY-PROTEIN:-ankyrin-repeat-and-protein-kinase-domain-containing-protein-1-[Macaca-nemestrina]	XP_021148384.1-caspase-2-isoform-X1-[Columba-livia]	XP_040084739.1-caspase-8-isoform-X2-[Oryx-dammah]	XP_049663865.1-caspase-9-isoform-X1-[Accipiter-gentilis]	XP_019733387.1-PREDICTED:-caspase-8-like-isoform-X2-[Hippocampus-comes]	XP_016392349.1-PREDICTED:-FAS-associated-death-domain-protein-like-[Sinocyclocheilus-rhinocerous]	XP_038024889.1-TIR-domain-containing-adapter-molecule-1-isoform-X1-[Anas-platyrhynchos]	XP_044149196.1-nucleotide-binding-oligomerization-domain-containing-protein-1-like-isoform-X1-[Bufo-gargarizans]	XP_033074258.1-nucleotide-binding-oligomerization-domain-containing-protein-2-isoform-X1-[Trachypithecus-francoisi]	NP_956892.1-interferon-regulatory-factor-6-[Danio-rerio]
XP_029909242.1-receptor-interacting-serine/threonine-protein-kinase-3-like-isoform-X2-[Myripristis-murdjan]	XP_005305889.1-Z-DNA-binding-protein-1-[Chrysemys-picta-bellii]	XP_009195110.2-mixed-lineage-kinase-domain-like-protein-isoform-X1-[Papio-anubis]	XP_011956742.1-receptor-interacting-serine/threonine-protein-kinase-1-isoform-X1-[Ovis-aries]	XP_027698818.1-receptor-interacting-serine/threonine-protein-kinase-2-isoform-X1-[Vombatus-ursinus]	XP_026051513.1-receptor-interacting-serine/threonine-protein-kinase-2-like-isoform-X1-[Carassius-auratus]	XP_050778663.1-receptor-interacting-serine/threonine-protein-kinase-2-like-[Gopherus-flavomarginatus]	XP_051840726.1-LOW-QUALITY-PROTEIN:-receptor-interacting-serine/threonine-protein-kinase-4-[Antechinus-flavipes]	XP_025862525.1-ankyrin-repeat-and-protein-kinase-domain-containing-protein-1-[Vulpes-vulpes]	XP_039913082.1-caspase-2-isoform-X2-[Hirundo-rustica]	XP_036175483.1-caspase-8-isoform-X1-[Myotis-myotis]	XP_049663875.1-caspase-9-isoform-X2-[Accipiter-gentilis]	XP_007258023.3-caspase-8-isoform-X2-[Astyanax-mexicanus]	XP_009635370.1-FAS-associated-death-domain-protein-isoform-X1-[Egretta-garzetta]	XP_044138486.1-TIR-domain-containing-adapter-molecule-1-like-[Bufo-gargarizans]	XP_044149202.1-nucleotide-binding-oligomerization-domain-containing-protein-1-like-isoform-X2-[Bufo-gargarizans] (2)	XP_031514112.1-nucleotide-binding-oligomerization-domain-containing-protein-2-isoform-X2-[Papio-anubis]	XP_039538401.1-interferon-regulatory-factor-6-[Pimephales-promelas]
XP_006061517.1-receptor-interacting-serine/threonine-protein-kinase-3-isoform-X1-[Bubalus-bubalis]	XP_034643850.1-Z-DNA-binding-protein-1-[Trachemys-scripta-elegans]	XP_025227347.1-mixed-lineage-kinase-domain-like-protein-[Theropithecus-gelada]	NP_001100820.1-receptor-interacting-serine/threonine-protein-kinase-1-[Rattus-norvegicus]	XP_045417428.1-receptor-interacting-serine/threonine-protein-kinase-2-[Lemur-catta]	XP_029867495.1-receptor-interacting-serine/threonine-protein-kinase-2-isoform-X2-[Aquila-chrysaetos-chrysaetos]	XP_038596523.1-receptor-interacting-serine/threonine-protein-kinase-2-like-isoform-X1-[Tachyglossus-aculeatus]	XP_047421139.1-receptor-interacting-serine/threonine-protein-kinase-4-[Sciurus-carolinensis]	XP_036602065.1-ankyrin-repeat-and-protein-kinase-domain-containing-protein-1-[Trichosurus-vulpecula]	NP_001137576.1-caspase-2-[Bos-taurus]	XP_011367462.1-caspase-8-[Pteropus-vampyrus]	XP_052647063.1-caspase-9-[Harpia-harpyja]	XP_005723579.1-PREDICTED:-caspase-8-like-isoform-X2-[Pundamilia-nyererei]	XP_021022996.1-FAS-associated-death-domain-protein-[Mus-caroli]	XP_022412677.1-TIR-domain-containing-adapter-molecule-1-[Delphinapterus-leucas]	XP_044151105.1-nucleotide-binding-oligomerization-domain-containing-protein-1-like-[Bufo-gargarizans]	XP_011757605.1-nucleotide-binding-oligomerization-domain-containing-protein-2-isoform-X2-[Macaca-nemestrina]	XP_048037913.1-interferon-regulatory-factor-6-[Megalobrama-amblycephala]
XP_032400268.1-receptor-interacting-serine/threonine-protein-kinase-3-like-isoform-X2-[Etheostoma-spectabile]	XP_053901950.1-Z-DNA-binding-protein-1-[Malaclemys-terrapin-pileata]	XP_011889988.1-PREDICTED:-mixed-lineage-kinase-domain-like-protein-isoform-X1-[Cercocebus-atys]	XP_015238682.1-PREDICTED:-receptor-interacting-serine/threonine-protein-kinase-1-[Cyprinodon-variegatus]	XP_001084687.1-receptor-interacting-serine/threonine-protein-kinase-2-isoform-X1-[Macaca-mulatta]	XP_030219057.1-receptor-interacting-serine/threonine-protein-kinase-2-isoform-X3-[Gadus-morhua]	XP_043382465.1-receptor-interacting-serine/threonine-protein-kinase-2-isoform-X2-[Chelonia-mydas]	XP_032888415.1-receptor-interacting-serine/threonine-protein-kinase-4-[Amblyraja-radiata]	XP_020845406.1-ankyrin-repeat-and-protein-kinase-domain-containing-protein-1-[Phascolarctos-cinereus]	XP_030250903.1-caspase-2-isoform-X4-[Sparus-aurata]	XP_023786596.1-caspase-8-like-isoform-X2-[Cyanistes-caeruleus]	XP_029874688.1-caspase-9-[Aquila-chrysaetos-chrysaetos]	XP_032210311.1-caspase-10-isoform-X1-[Mustela-erminea]	XP_006642719.1-PREDICTED:-FAS-associated-death-domain-protein-[Lepisosteus-oculatus]	XP_039766215.1-TIR-domain-containing-adapter-molecule-1-[Ornithorhynchus-anatinus]	XP_040289926.1-nucleotide-binding-oligomerization-domain-containing-protein-1-like-[Bufo-bufo] (2)	XP_011757602.1-nucleotide-binding-oligomerization-domain-containing-protein-2-isoform-X1-[Macaca-nemestrina] (2)	XP_051766149.1-interferon-regulatory-factor-6-[Ctenopharyngodon-idella]
XP_052503050.1-receptor-interacting-serine/threonine-protein-kinase-3-[Budorcas-taxicolor]	XP_044841736.1-Z-DNA-binding-protein-1-[Mauremys-mutica]	XP_011832183.1-PREDICTED:-mixed-lineage-kinase-domain-like-protein-[Mandrillus-leucophaeus]	XP_043921272.1-receptor-interacting-serine/threonine-protein-kinase-1-isoform-X1-[Protopterus-annectens]	XP_003438091.2-receptor-interacting-serine/threonine-protein-kinase-2-[Oreochromis-niloticus]	XP_018888365.1-receptor-interacting-serine/threonine-protein-kinase-2-[Gorilla-gorilla-gorilla]	XP_030907814.1-receptor-interacting-serine/threonine-protein-kinase-2-like-isoform-X2-[Melopsittacus-undulatus]	XP_038202615.1-receptor-interacting-serine/threonine-protein-kinase-4-[Arvicola-amphibius]	XP_040181948.1-ankyrin-repeat-and-protein-kinase-domain-containing-protein-1-isoform-X1-[Rana-temporaria]	XP_025147517.2-caspase-2-isoform-X2-[Bubalus-bubalis]	XP_055667491.1-caspase-8-isoform-X1-[Falco-peregrinus]	XP_030363541.1-caspase-9-[Strigops-habroptila]	XP_055146167.1-caspase-10-isoform-X1-[Symphalangus-syndactylus]	XP_033914047.2-FAS-associated-death-domain-protein-like-[Acipenser-ruthenus]	XP_051822784.1-TIR-domain-containing-adapter-molecule-1-[Antechinus-flavipes]	XP_040289381.1-nucleotide-binding-oligomerization-domain-containing-protein-1-like-[Bufo-bufo]	XP_011757607.1-nucleotide-binding-oligomerization-domain-containing-protein-2-isoform-X4-[Macaca-nemestrina]	XP_039604520.1-interferon-regulatory-factor-6-[Polypterus-senegalus]
XP_003474333.3-receptor-interacting-serine/threonine-protein-kinase-3-isoform-X1-[Cavia-porcellus]	XP_039354783.1-Z-DNA-binding-protein-1-[Mauremys-reevesii]	XP_032013789.1-mixed-lineage-kinase-domain-like-protein-isoform-X1-[Hylobates-moloch]	XP_025120708.1-receptor-interacting-serine/threonine-protein-kinase-1-[Bubalus-bubalis]	XP_039732959.1-receptor-interacting-serine/threonine-protein-kinase-2-isoform-X3-[Pteropus-giganteus]	XP_031665595.1-receptor-interacting-serine/threonine-protein-kinase-2-isoform-X2-[Oncorhynchus-kisutch]	XP_019907783.2-receptor-interacting-serine/threonine-protein-kinase-2-isoform-X1-[Esox-lucius]	XP_027660234.1-receptor-interacting-serine/threonine-protein-kinase-4-[Falco-cherrug]	XP_027555404.1-ankyrin-repeat-and-protein-kinase-domain-containing-protein-1-[Neopelma-chrysocephalum]	XP_054637668.1-caspase-2-isoform-X2-[Dunckerocampus-dactyliophorus]	XP_035187964.1-caspase-8-isoform-X2-[Oxyura-jamaicensis]	XP_033924546.1-caspase-9-[Melopsittacus-undulatus]	XP_013996326.2-caspase-8-isoform-X1-[Salmo-salar]	XP_057882313.1-FAS-associated-death-domain-protein-[Melospiza-georgiana]	XP_040028084.1-TIR-domain-containing-adapter-molecule-1-[Gasterosteus-aculeatus-aculeatus]	XP_044149123.1-nucleotide-binding-oligomerization-domain-containing-protein-1-like-isoform-X1-[Bufo-gargarizans] (2)	XP_011757606.1-nucleotide-binding-oligomerization-domain-containing-protein-2-isoform-X3-[Macaca-nemestrina] (2)	XP_028652909.2-interferon-regulatory-factor-6-[Erpetoichthys-calabaricus]
XP_043980219.1-receptor-interacting-serine/threonine-protein-kinase-3-like-isoform-X2-[Gambusia-affinis]	XP_032638479.1-Z-DNA-binding-protein-1-[Chelonoidis-abingdonii]	XP_032013791.1-mixed-lineage-kinase-domain-like-protein-isoform-X2-[Hylobates-moloch]	XP_010336394.2-receptor-interacting-serine/threonine-protein-kinase-1-isoform-X1-[Saimiri-boliviensis-boliviensis]	XP_047639601.1-receptor-interacting-serine/threonine-protein-kinase-2-isoform-X2-[Phacochoerus-africanus]	XP_005362394.1-receptor-interacting-serine/threonine-protein-kinase-2-isoform-X2-[Microtus-ochrogaster]	XP_040982096.1-LOW-QUALITY-PROTEIN:-receptor-interacting-serine/threonine-protein-kinase-2-like-[Aquila-chrysaetos-chrysaetos]	XP_017394100.1-receptor-interacting-serine/threonine-protein-kinase-4-isoform-X1-[Cebus-imitator]	XP_005720998.1-PREDICTED:-ankyrin-repeat-and-protein-kinase-domain-containing-protein-1-[Pundamilia-nyererei]	XP_037129215.1-caspase-2-isoform-X2-[Syngnathus-acus]	XP_033285953.1-caspase-8-isoform-X1-[Orcinus-orca]	XP_057264071.1-caspase-9-[Pezoporus-wallicus]	XP_030259606.1-caspase-8-like-isoform-X1-[Sparus-aurata]	XP_051811783.1-protein-FADD-[Acanthochromis-polyacanthus]	XP_037315392.1-TIR-domain-containing-adapter-molecule-1-[Pungitius-pungitius]	XP_033785946.1-nucleotide-binding-oligomerization-domain-containing-protein-1-isoform-X1-[Geotrypetes-seraphini]	XP_031514114.1-nucleotide-binding-oligomerization-domain-containing-protein-2-isoform-X7-[Papio-anubis]	XP_018606616.1-interferon-regulatory-factor-6-[Scleropages-formosus]
XP_035386140.1-receptor-interacting-serine/threonine-protein-kinase-4-isoform-X1-[Electrophorus-electricus]	XP_030389248.1-Z-DNA-binding-protein-1-[Gopherus-evgoodei]	XP_030685115.1-LOW-QUALITY-PROTEIN:-mixed-lineage-kinase-domain-like-protein-[Nomascus-leucogenys]	NP_001341860.1-receptor-interacting-serine/threonine-protein-kinase-1-isoform-3-[Homo-sapiens]	XP_034619124.1-receptor-interacting-serine/threonine-protein-kinase-2-[Trachemys-scripta-elegans]	XP_019958353.1-PREDICTED:-receptor-interacting-serine/threonine-protein-kinase-2-isoform-X2-[Paralichthys-olivaceus]	XP_039577362.1-receptor-interacting-serine/threonine-protein-kinase-2-like-[Passer-montanus]	XP_034971335.1-receptor-interacting-serine/threonine-protein-kinase-4-[Zootoca-vivipara]	XP_021135123.1-ankyrin-repeat-and-protein-kinase-domain-containing-protein-1-[Anas-platyrhynchos]	XP_016419297.1-PREDICTED:-caspase-2-like-isoform-X3-[Sinocyclocheilus-rhinocerous]	XP_057275869.1-caspase-8-isoform-X1-[Pezoporus-wallicus]	XP_040441416.1-caspase-9-isoform-X1-[Falco-naumanni]	XP_043097680.1-caspase-8-[Puntigrus-tetrazona]	XP_038825390.1-FAS-associated-death-domain-protein-like-[Salvelinus-namaycush]	XP_050950876.1-TIR-domain-containing-adapter-molecule-1-[Labeo-rohita]	XP_043920952.1-nucleotide-binding-oligomerization-domain-containing-protein-1-isoform-X1-[Protopterus-annectens]	XP_031514115.1-nucleotide-binding-oligomerization-domain-containing-protein-2-isoform-X8-[Papio-anubis] (2)	XP_028853875.1-interferon-regulatory-factor-6-[Denticeps-clupeoides]
XP_035011713.2-receptor-interacting-serine/threonine-protein-kinase-3-isoform-X2-[Hippoglossus-stenolepis]	XP_050774198.1-Z-DNA-binding-protein-1-[Gopherus-flavomarginatus]	XP_055153920.1-LOW-QUALITY-PROTEIN:-mixed-lineage-kinase-domain-like-protein-[Symphalangus-syndactylus]	XP_014855992.1-PREDICTED:-receptor-interacting-serine/threonine-protein-kinase-1-[Poecilia-mexicana]	XP_048214726.1-receptor-interacting-serine/threonine-protein-kinase-2-isoform-X2-[Perognathus-longimembris-pacificus]	XP_026310696.1-receptor-interacting-serine/threonine-protein-kinase-2-isoform-X1-[Piliocolobus-tephrosceles]	XP_039359132.1-receptor-interacting-serine/threonine-protein-kinase-2-like-[Mauremys-reevesii]	XP_050188760.1-receptor-interacting-serine/threonine-protein-kinase-4-[Myiozetetes-cayanensis]	XP_030918247.1-ankyrin-repeat-and-protein-kinase-domain-containing-protein-1-[Geospiza-fortis]	XP_041843822.1-caspase-2-isoform-X2-[Melanotaenia-boesemani]	XP_026709027.1-caspase-8-like-[Athene-cunicularia]	XP_037238050.1-caspase-9-isoform-X2-[Falco-rusticolus]	XP_018532964.1-caspase-8-isoform-X2-[Lates-calcarifer]	XP_003206412.1-FAS-associated-death-domain-protein-[Meleagris-gallopavo]	NP_001025472.1-TIR-domain-containing-adapter-molecule-1-[Bos-taurus]	XP_043920954.1-nucleotide-binding-oligomerization-domain-containing-protein-1-isoform-X2-[Protopterus-annectens]	XP_021787644.2-nucleotide-binding-oligomerization-domain-containing-protein-2-isoform-X3-[Papio-anubis]	XP_048878155.1-interferon-regulatory-factor-6-[Brienomyrus-brachyistius]
XP_042615319.1-receptor-interacting-serine/threonine-protein-kinase-3-isoform-X4-[Cyprinus-carpio]	XP_055121988.1-Z-DNA-binding-protein-1-isoform-X1-[Symphalangus-syndactylus] (2)	XP_054390103.1-mixed-lineage-kinase-domain-like-protein-[Pongo-abelii]	XP_051467825.1-receptor-interacting-serine/threonine-protein-kinase-1-[Apus-apus]	XP_020661399.1-receptor-interacting-serine/threonine-protein-kinase-2-like-isoform-X2-[Pogona-vitticeps]	XP_006114389.1-receptor-interacting-serine/threonine-protein-kinase-2-isoform-X2-[Pelodiscus-sinensis]	XP_009089090.3-receptor-interacting-serine/threonine-protein-kinase-2-like-isoform-X1-[Serinus-canaria]	XP_024122505.1-receptor-interacting-serine/threonine-protein-kinase-4-[Oryzias-melastigma]	XP_023797120.1-ankyrin-repeat-and-protein-kinase-domain-containing-protein-1-[Cyanistes-caeruleus]	XP_022366082.1-caspase-2-isoform-X2-[Enhydra-lutris-kenyoni]	XP_015336740.1-caspase-8-isoform-X1-[Marmota-marmota-marmota]	XP_055559977.1-caspase-9-[Falco-cherrug]	XP_030642385.1-caspase-10-[Chanos-chanos]	XP_004051748.1-FAS-associated-death-domain-protein-[Gorilla-gorilla-gorilla]	XP_026888704.2-TIR-domain-containing-adapter-molecule-1-[Electrophorus-electricus]	XP_028673709.1-nucleotide-binding-oligomerization-domain-containing-protein-1-[Erpetoichthys-calabaricus] (2)	XP_021787645.2-nucleotide-binding-oligomerization-domain-containing-protein-2-isoform-X4-[Papio-anubis] (2)	XP_023696903.1-interferon-regulatory-factor-6-[Paramormyrops-kingsleyae]
XP_021505985.1-receptor-interacting-serine/threonine-protein-kinase-3-[Meriones-unguiculatus]	XP_055121989.1-Z-DNA-binding-protein-1-isoform-X2-[Symphalangus-syndactylus] (2)	XP_054310887.1-mixed-lineage-kinase-domain-like-protein-isoform-X2-[Pongo-pygmaeus]	XP_051943787.1-receptor-interacting-serine/threonine-protein-kinase-1-[Hippocampus-zosterae]	XP_005328693.1-receptor-interacting-serine/threonine-protein-kinase-2-[Ictidomys-tridecemlineatus]	XP_046314595.1-receptor-interacting-serine/threonine-protein-kinase-2-[Marmota-monax]	XP_026712701.1-receptor-interacting-serine/threonine-protein-kinase-2-like-isoform-X1-[Athene-cunicularia]	XP_008825572.1-receptor-interacting-serine/threonine-protein-kinase-4-[Nannospalax-galili]	XP_036010896.1-ankyrin-repeat-and-protein-kinase-domain-containing-protein-1-isoform-X1-[Mus-musculus]	XP_033836393.1-caspase-2-isoform-X2-[Periophthalmus-magnuspinnatus]	XP_013807775.1-PREDICTED:-caspase-8-[Apteryx-mantelli-mantelli]	XP_055654658.1-caspase-9-[Falco-peregrinus]	XP_006190034.2-LOW-QUALITY-PROTEIN:-caspase-10-[Camelus-ferus]	XP_029012739.1-uncharacterized-protein-zgc:174906-[Betta-splendens]	XP_043079841.1-TIR-domain-containing-adapter-molecule-1-[Puntigrus-tetrazona]	XP_039593529.1-nucleotide-binding-oligomerization-domain-containing-protein-1-[Polypterus-senegalus] (2)	XP_003916914.3-nucleotide-binding-oligomerization-domain-containing-protein-2-isoform-X1-[Papio-anubis]	XP_046892990.1-interferon-regulatory-factor-6-[Hypomesus-transpacificus]
XP_010902058.2-receptor-interacting-serine/threonine-protein-kinase-3-isoform-X1-[Esox-lucius]	XP_031998197.1-Z-DNA-binding-protein-1-isoform-X2-[Hylobates-moloch] (2)	XP_054310884.1-mixed-lineage-kinase-domain-like-protein-isoform-X1-[Pongo-pygmaeus]	XP_038652592.1-receptor-interacting-serine/threonine-protein-kinase-1-isoform-X2-[Scyliorhinus-canicula]	XP_039619132.1-receptor-interacting-serine/threonine-protein-kinase-2-[Polypterus-senegalus]	XP_040210528.1-receptor-interacting-serine/threonine-protein-kinase-2-isoform-X1-[Rana-temporaria]	XP_029494767.1-receptor-interacting-serine/threonine-protein-kinase-2-like-[Oncorhynchus-nerka]	XP_020670418.1-receptor-interacting-serine/threonine-protein-kinase-4-[Pogona-vitticeps]	XP_009697972.1-PREDICTED:-ankyrin-repeat-and-protein-kinase-domain-containing-protein-1-[Cariama-cristata]	XP_012422883.1-PREDICTED:-caspase-2-isoform-X1-[Odobenus-rosmarus-divergens]	XP_039073722.1-caspase-8-[Hyaena-hyaena]	XP_056186603.1-caspase-9-[Falco-biarmicus]	XP_016805007.2-caspase-10-isoform-X2-[Pan-troglodytes]	XP_019407747.1-PREDICTED:-FAS-associated-death-domain-protein-[Crocodylus-porosus]	XP_027522403.1-TIR-domain-containing-adapter-molecule-1-[Corapipo-altera]	XP_006635669.1-PREDICTED:-nucleotide-binding-oligomerization-domain-containing-protein-1-[Lepisosteus-oculatus]	XP_011844045.1-PREDICTED:-nucleotide-binding-oligomerization-domain-containing-protein-2-[Mandrillus-leucophaeus]	XP_010879828.3-interferon-regulatory-factor-6-[Esox-lucius]
XP_020468648.1-receptor-interacting-serine/threonine-protein-kinase-3-like-isoform-X3-[Monopterus-albus]	XP_031998196.1-Z-DNA-binding-protein-1-isoform-X1-[Hylobates-moloch] (2)	XP_030858817.1-mixed-lineage-kinase-domain-like-protein-[Gorilla-gorilla-gorilla]	XP_035271366.1-receptor-interacting-serine/threonine-protein-kinase-1-like-isoform-X2-[Anguilla-anguilla]	XP_015831290.1-PREDICTED:-receptor-interacting-serine/threonine-protein-kinase-2-[Nothobranchius-furzeri]	XP_040910581.1-receptor-interacting-serine/threonine-protein-kinase-2-like-isoform-X1-[Toxotes-jaculatrix]	XP_024058004.1-receptor-interacting-serine/threonine-protein-kinase-2-like-[Terrapene-carolina-triunguis]	XP_036732784.1-receptor-interacting-serine/threonine-protein-kinase-4-[Manis-pentadactyla]	XP_029877234.1-ankyrin-repeat-and-protein-kinase-domain-containing-protein-1-[Aquila-chrysaetos-chrysaetos]	XP_049903373.1-caspase-2-isoform-X6-[Epinephelus-moara]	XP_043916442.1-caspase-8-[Protopterus-annectens]	XP_037238049.1-caspase-9-isoform-X1-[Falco-rusticolus]	XP_032610875.1-caspase-10-isoform-X2-[Hylobates-moloch]	XP_005351660.1-FAS-associated-death-domain-protein-[Microtus-ochrogaster]	NP_001302667.1-TIR-domain-containing-adapter-molecule-1-[Sus-scrofa]	XP_041100721.1-nucleotide-binding-oligomerization-domain-containing-protein-1-like-isoform-X1-[Polyodon-spathula]	XP_011922077.1-PREDICTED:-nucleotide-binding-oligomerization-domain-containing-protein-2-isoform-X2-[Cercocebus-atys]	XP_041744186.2-interferon-regulatory-factor-6-like-[Coregonus-clupeaformis]
XP_014941702.1-receptor-interacting-serine/threonine-protein-kinase-3-isoform-X1-[Acinonyx-jubatus]	XP_055121990.1-Z-DNA-binding-protein-1-isoform-X3-[Symphalangus-syndactylus] (2)	XP_009429522.1-mixed-lineage-kinase-domain-like-protein-isoform-X2-[Pan-troglodytes]	XP_029446398.1-receptor-interacting-serine/threonine-protein-kinase-1-isoform-X1-[Rhinatrema-bivittatum]	XP_042664913.1-receptor-interacting-serine/threonine-protein-kinase-2-[Centrocercus-urophasianus]	XP_038574351.1-receptor-interacting-serine/threonine-protein-kinase-2-like-isoform-X5-[Micropterus-salmoides]	XP_040265806.1-receptor-interacting-serine/threonine-protein-kinase-2-like-isoform-X3-[Bufo-bufo]	XP_044131117.1-receptor-interacting-serine/threonine-protein-kinase-4-like-[Bufo-gargarizans]	XP_013814186.1-PREDICTED:-ankyrin-repeat-and-protein-kinase-domain-containing-protein-1-like-[Apteryx-mantelli-mantelli]	XP_042533122.1-caspase-2-isoform-X3-[Dipodomys-spectabilis]	XP_037705837.1-caspase-8-[Choloepus-didactylus]	XP_040441417.1-caspase-9-isoform-X2-[Falco-naumanni]	XP_047227257.1-caspase-8-isoform-X2-[Girardinichthys-multiradiatus]	NP_001026967.1-FAS-associated-death-domain-protein-[Sus-scrofa]	XP_024425012.2-TIR-domain-containing-adapter-molecule-1-[Desmodus-rotundus]	XP_041100723.1-nucleotide-binding-oligomerization-domain-containing-protein-1-like-isoform-X2-[Polyodon-spathula]	XP_011922048.1-PREDICTED:-nucleotide-binding-oligomerization-domain-containing-protein-2-isoform-X1-[Cercocebus-atys] (2)	XP_023847664.1-interferon-regulatory-factor-6-[Salvelinus-alpinus]
XP_047203282.1-receptor-interacting-serine/threonine-protein-kinase-3-like-isoform-X2-[Girardinichthys-multiradiatus]	XP_031998199.1-Z-DNA-binding-protein-1-isoform-X3-[Hylobates-moloch] (2)	XP_008953137.3-mixed-lineage-kinase-domain-like-protein-isoform-X1-[Pan-paniscus]	XP_025019625.1-receptor-interacting-serine/threonine-protein-kinase-1-isoform-X2-[Python-bivittatus]	XP_020333356.2-receptor-interacting-serine/threonine-protein-kinase-2-isoform-X2-[Oncorhynchus-kisutch]	XP_028834137.1-receptor-interacting-serine/threonine-protein-kinase-2-[Denticeps-clupeoides]	XP_041916706.1-receptor-interacting-serine/threonine-protein-kinase-2-[Alosa-sapidissima]	XP_045396660.1-receptor-interacting-serine/threonine-protein-kinase-4-[Lemur-catta]	XP_006890849.1-PREDICTED:-LOW-QUALITY-PROTEIN:-ankyrin-repeat-and-protein-kinase-domain-containing-protein-1-[Elephantulus-edwardii]	XP_055140294.1-caspase-2-isoform-X3-[Symphalangus-syndactylus]	XP_010147130.1-PREDICTED:-caspase-8-like-[Eurypyga-helias]	XP_030319495.1-caspase-9-isoform-X2-[Calypte-anna]	XP_012594479.1-caspase-10-[Microcebus-murinus]	XP_056591704.1-protein-FADD-[Triplophysa-dalaica]	XP_018532364.1-TIR-domain-containing-adapter-molecule-1-[Lates-calcarifer]	XP_033856259.3-nucleotide-binding-oligomerization-domain-containing-protein-1-like-isoform-X2-[Acipenser-ruthenus] (2)	XP_011922085.1-PREDICTED:-nucleotide-binding-oligomerization-domain-containing-protein-2-isoform-X3-[Cercocebus-atys] (2)	XP_055771651.1-interferon-regulatory-factor-6-like-isoform-X1-[Salvelinus-fontinalis]
XP_037335866.1-receptor-interacting-serine/threonine-protein-kinase-3-isoform-X2-[Pungitius-pungitius]	XP_030681657.1-Z-DNA-binding-protein-1-isoform-X3-[Nomascus-leucogenys] (2)	XP_016785656.1-mixed-lineage-kinase-domain-like-protein-isoform-X3-[Pan-troglodytes]	XP_026062917.1-receptor-interacting-serine/threonine-protein-kinase-1-like-[Carassius-auratus]	XP_013994858.1-receptor-interacting-serine/threonine-protein-kinase-2-like-[Salmo-salar]	XP_041891769.1-receptor-interacting-serine/threonine-protein-kinase-2-[Corvus-kubaryi]	XP_015285207.1-PREDICTED:-receptor-interacting-serine/threonine-protein-kinase-2-like-[Gekko-japonicus]	XP_014793748.1-PREDICTED:-receptor-interacting-serine/threonine-protein-kinase-4-isoform-X1-[Calidris-pugnax]	XP_029028303.1-LOW-QUALITY-PROTEIN:-ankyrin-repeat-and-protein-kinase-domain-containing-protein-1-[Betta-splendens]	XP_054871066.1-LOW-QUALITY-PROTEIN:-caspase-2-like-[Amphiprion-ocellaris]	XP_023398131.1-caspase-8-isoform-X1-[Loxodonta-africana]	XP_030319494.1-caspase-9-isoform-X1-[Calypte-anna]	XP_043989186.1-caspase-8-like-[Gambusia-affinis]	XP_051885145.1-protein-FADD-[Pristis-pectinata]	XP_021454523.1-TIR-domain-containing-adapter-molecule-1-[Oncorhynchus-mykiss]	XP_034772213.2-nucleotide-binding-oligomerization-domain-containing-protein-1-like-isoform-X1-[Acipenser-ruthenus]	XP_045237639.1-nucleotide-binding-oligomerization-domain-containing-protein-2-isoform-X4-[Macaca-fascicularis]	XP_055771668.1-interferon-regulatory-factor-6-like-isoform-X2-[Salvelinus-fontinalis]
XP_019823821.1-PREDICTED:-receptor-interacting-serine/threonine-protein-kinase-3-isoform-X2-[Bos-indicus]	XP_030681656.1-Z-DNA-binding-protein-1-isoform-X2-[Nomascus-leucogenys] (2)	XP_047289666.1-mixed-lineage-kinase-domain-like-protein-isoform-X8-[Homo-sapiens]	XP_010203077.1-PREDICTED:-receptor-interacting-serine/threonine-protein-kinase-1-[Colius-striatus]	XP_023856836.1-receptor-interacting-serine/threonine-protein-kinase-2-isoform-X1-[Salvelinus-alpinus]	XP_037537549.1-receptor-interacting-serine/threonine-protein-kinase-2-[Nematolebias-whitei]	XP_045545015.1-receptor-interacting-serine/threonine-protein-kinase-2-isoform-X1-[Salmo-salar]	XP_035762875.1-receptor-interacting-serine/threonine-protein-kinase-4-[Neolamprologus-brichardi]	NP_001363880.1-ankyrin-repeat-and-protein-kinase-domain-containing-protein-1-isoform-1-[Mus-musculus]	XP_053486169.1-caspase-2-isoform-X3-[Ictalurus-furcatus]	XP_048809185.1-caspase-8-like-[Lagopus-muta]	XP_051493077.1-caspase-9-isoform-X1-[Apus-apus]	XP_030638356.1-caspase-8-like-[Chanos-chanos]	XP_032747209.1-FAS-associated-death-domain-protein-[Rattus-rattus]	XP_054322385.1-TIR-domain-containing-adapter-molecule-1-[Pongo-pygmaeus]	XP_033849668.3-nucleotide-binding-oligomerization-domain-containing-protein-1-isoform-X1-[Acipenser-ruthenus] (2)	XP_045237641.1-nucleotide-binding-oligomerization-domain-containing-protein-2-isoform-X6-[Macaca-fascicularis] (2)	XP_038866618.1-interferon-regulatory-factor-6-like-[Salvelinus-namaycush]
XP_049328608.1-receptor-interacting-serine/threonine-protein-kinase-3-isoform-X1-[Astyanax-mexicanus]	XP_004090106.1-Z-DNA-binding-protein-1-isoform-X1-[Nomascus-leucogenys] (2)	XP_047289662.1-mixed-lineage-kinase-domain-like-protein-isoform-X4-[Homo-sapiens]	XP_031662730.1-receptor-interacting-serine/threonine-protein-kinase-1-isoform-X2-[Oncorhynchus-kisutch]	XP_018770155.2-receptor-interacting-serine/threonine-protein-kinase-2-like-isoform-X2-[Serinus-canaria]	XP_012499112.1-PREDICTED:-receptor-interacting-serine/threonine-protein-kinase-2-[Propithecus-coquereli]	XP_038846927.1-receptor-interacting-serine/threonine-protein-kinase-2-isoform-X2-[Salvelinus-namaycush]	XP_030139656.3-receptor-interacting-serine/threonine-protein-kinase-4-[Taeniopygia-guttata]	XP_039085049.1-ankyrin-repeat-and-protein-kinase-domain-containing-protein-1-[Hyaena-hyaena]	XP_055203111.1-caspase-2-isoform-X5-[Gorilla-gorilla-gorilla]	XP_001172193.1-caspase-8-isoform-X1-[Pan-troglodytes]	XP_051493078.1-caspase-9-isoform-X2-[Apus-apus]	XP_036396854.1-caspase-8-isoform-X2-[Megalops-cyprinoides]	XP_020344271.1-LOW-QUALITY-PROTEIN:-FAS-associated-death-domain-protein-like-[Oncorhynchus-kisutch]	XP_005587645.1-PREDICTED:-TIR-domain-containing-adapter-molecule-1-isoform-X1-[Macaca-fascicularis]	XP_041104325.1-nucleotide-binding-oligomerization-domain-containing-protein-1-[Polyodon-spathula] (2)	XP_045237636.1-nucleotide-binding-oligomerization-domain-containing-protein-2-isoform-X2-[Macaca-fascicularis] (2)	XP_013988514.1-interferon-regulatory-factor-6-[Salmo-salar]
XP_049468956.1-receptor-interacting-serine/threonine-protein-kinase-3-isoform-X2-[Panthera-uncia]	XP_054323499.1-Z-DNA-binding-protein-1-isoform-X3-[Pongo-pygmaeus] (2)	XP_047289660.1-mixed-lineage-kinase-domain-like-protein-isoform-X2-[Homo-sapiens]	XP_045908401.1-receptor-interacting-serine/threonine-protein-kinase-1-isoform-X1-[Micropterus-dolomieu]	XP_027141055.1-receptor-interacting-serine/threonine-protein-kinase-2-isoform-X2-[Larimichthys-crocea]	XP_038204259.1-receptor-interacting-serine/threonine-protein-kinase-2-isoform-X1-[Arvicola-amphibius]	XP_038003786.1-receptor-interacting-serine/threonine-protein-kinase-2-like-isoform-X3-[Motacilla-alba-alba]	XP_050018090.1-receptor-interacting-serine/threonine-protein-kinase-4-[Microtus-fortis]	XP_026719629.1-ankyrin-repeat-and-protein-kinase-domain-containing-protein-1-[Athene-cunicularia]	XP_028984870.1-caspase-2-isoform-X2-[Betta-splendens]	XP_054335073.1-caspase-8-isoform-X5-[Pongo-pygmaeus]	XP_032057375.1-caspase-9-isoform-X1-[Aythya-fuligula]	XP_025260800.1-caspase-10-isoform-X1-[Theropithecus-gelada]	XP_008285148.1-PREDICTED:-FAS-associated-death-domain-protein-like-[Stegastes-partitus]	XP_010298283.1-PREDICTED:-TIR-domain-containing-adapter-molecule-1-[Balearica-regulorum-gibbericeps]	XP_055067562.1-nucleotide-binding-oligomerization-domain-containing-protein-1-[Misgurnus-anguillicaudatus]	XP_045237634.1-nucleotide-binding-oligomerization-domain-containing-protein-2-isoform-X1-[Macaca-fascicularis]	XP_029631163.1-interferon-regulatory-factor-6-like-[Salmo-trutta]
XP_046931502.1-receptor-interacting-serine/threonine-protein-kinase-3-like-[Lynx-rufus]	XP_054323498.1-Z-DNA-binding-protein-1-isoform-X2-[Pongo-pygmaeus] (2)	XP_047289663.1-mixed-lineage-kinase-domain-like-protein-isoform-X5-[Homo-sapiens]	XP_041269224.1-receptor-interacting-serine/threonine-protein-kinase-1-isoform-X1-[Onychostruthus-taczanowskii]	XP_042293925.1-receptor-interacting-serine/threonine-protein-kinase-2-like-[Sceloporus-undulatus]	XP_018955475.1-receptor-interacting-serine/threonine-protein-kinase-2-[Cyprinus-carpio]	XP_040185048.1-receptor-interacting-serine/threonine-protein-kinase-2-like-[Rana-temporaria]	XP_013810700.1-PREDICTED:-receptor-interacting-serine/threonine-protein-kinase-4-[Apteryx-mantelli-mantelli]	XP_010136377.1-PREDICTED:-ankyrin-repeat-and-protein-kinase-domain-containing-protein-1,-partial-[Buceros-rhinoceros-silvestris]	XP_030164512.1-caspase-2-isoform-X3-[Lynx-canadensis]	XP_012866144.1-PREDICTED:-caspase-8-isoform-X2-[Dipodomys-ordii]	XP_032057376.1-caspase-9-isoform-X2-[Aythya-fuligula]	XP_048056549.1-caspase-8-like-isoform-X1-[Megalobrama-amblycephala]	XP_036400283.1-protein-FADD-[Megalops-cyprinoides]	XP_031137132.1-TIR-domain-containing-adapter-molecule-1-[Sander-lucioperca]	XP_057196231.1-nucleotide-binding-oligomerization-domain-containing-protein-1-isoform-X1-[Triplophysa-rosa]	XP_045237638.1-nucleotide-binding-oligomerization-domain-containing-protein-2-isoform-X3-[Macaca-fascicularis]	XP_020345512.1-interferon-regulatory-factor-6-like-[Oncorhynchus-kisutch]
XP_028841519.1-receptor-interacting-serine/threonine-protein-kinase-3-like-isoform-X1-[Denticeps-clupeoides]	XP_002830507.3-Z-DNA-binding-protein-1-[Pongo-abelii] (2)	NP_689862.1-mixed-lineage-kinase-domain-like-protein-isoform-1-[Homo-sapiens]	XP_028618988.1-receptor-interacting-serine/threonine-protein-kinase-1-[Grammomys-surdaster]	XP_043937460.1-receptor-interacting-serine/threonine-protein-kinase-2-like-[Protopterus-annectens]	XP_030259800.1-receptor-interacting-serine/threonine-protein-kinase-2-isoform-X2-[Sparus-aurata]	XP_009275019.1-PREDICTED:-receptor-interacting-serine/threonine-protein-kinase-2-isoform-X2-[Aptenodytes-forsteri]	XP_037687361.1-receptor-interacting-serine/threonine-protein-kinase-4-isoform-X1-[Choloepus-didactylus]	XP_014325004.1-ankyrin-repeat-and-protein-kinase-domain-containing-protein-1-[Xiphophorus-maculatus]	XP_036440690.1-caspase-2-isoform-X1-[Colossoma-macropomum]	XP_008579873.1-PREDICTED:-caspase-8-[Galeopterus-variegatus]	XP_038022448.1-caspase-9-[Anas-platyrhynchos]	XP_038136142.1-caspase-8-isoform-X2-[Cyprinodon-tularosa]	XP_044540864.1-LOW-QUALITY-PROTEIN:-FAS-associated-death-domain-protein,-partial-[Gracilinanus-agilis]	XP_060485904.1-TIR-domain-containing-adapter-molecule-1-[Panthera-onca]	XP_056618228.1-nucleotide-binding-oligomerization-domain-containing-protein-1-isoform-X1-[Triplophysa-dalaica] (2)	XP_007991150.2-nucleotide-binding-oligomerization-domain-containing-protein-2-[Chlorocebus-sabaeus]	XP_021424980.1-interferon-regulatory-factor-6-isoform-X2-[Oncorhynchus-mykiss]
XP_019823822.1-PREDICTED:-receptor-interacting-serine/threonine-protein-kinase-3-isoform-X3-[Bos-indicus]	XP_054323497.1-Z-DNA-binding-protein-1-isoform-X1-[Pongo-pygmaeus] (2)	XP_014648169.1-PREDICTED:-mixed-lineage-kinase-domain-like-protein-isoform-X2-[Ceratotherium-simum-simum]	XP_022442253.1-receptor-interacting-serine/threonine-protein-kinase-1-isoform-X2-[Delphinapterus-leucas]	XP_005025779.2-receptor-interacting-serine/threonine-protein-kinase-2-isoform-X3-[Anas-platyrhynchos]	XP_024247754.1-receptor-interacting-serine/threonine-protein-kinase-2-[Oncorhynchus-tshawytscha]	XP_046204456.1-receptor-interacting-serine/threonine-protein-kinase-2-like-[Oncorhynchus-gorbuscha]	XP_003132829.1-receptor-interacting-serine/threonine-protein-kinase-4-[Sus-scrofa]	XP_042748950.1-LOW-QUALITY-PROTEIN:-ankyrin-repeat-and-protein-kinase-domain-containing-protein-1,-partial-[Lagopus-leucura]	XP_056236248.1-caspase-2-isoform-X2-[Seriola-aureovittata]	XP_016064298.1-PREDICTED:-caspase-8-[Miniopterus-natalensis]	XP_035200377.1-caspase-9-[Oxyura-jamaicensis]	XP_009583496.1-PREDICTED:-caspase-10-like-[Fulmarus-glacialis]	XP_058020348.1-FAS-associated-death-domain-protein-[Ahaetulla-prasina]	XP_031584320.2-TIR-domain-containing-adapter-molecule-1-[Oreochromis-aureus]	XP_056618229.1-nucleotide-binding-oligomerization-domain-containing-protein-1-isoform-X2-[Triplophysa-dalaica] (2)	XP_025226647.1-nucleotide-binding-oligomerization-domain-containing-protein-2-isoform-X1-[Theropithecus-gelada] (2)	XP_036806312.1-interferon-regulatory-factor-6-isoform-X1-[Oncorhynchus-mykiss]
XP_031747312.1-receptor-interacting-serine/threonine-protein-kinase-4-isoform-X2-[Xenopus-tropicalis]	XP_003317051.2-Z-DNA-binding-protein-1-isoform-X3-[Pan-troglodytes] (2)	XP_047648512.1-mixed-lineage-kinase-domain-like-protein-[Phacochoerus-africanus]	XP_008691085.1-receptor-interacting-serine/threonine-protein-kinase-1-[Ursus-maritimus]	XP_025917528.1-receptor-interacting-serine/threonine-protein-kinase-2-[Apteryx-rowi]	XP_030827425.1-receptor-interacting-serine/threonine-protein-kinase-2-isoform-X1-[Camarhynchus-parvulus]	XP_010286306.1-PREDICTED:-receptor-interacting-serine/threonine-protein-kinase-2-like-[Phaethon-lepturus]	XP_005526603.1-PREDICTED:-receptor-interacting-serine/threonine-protein-kinase-4-[Pseudopodoces-humilis]	XP_016159307.1-PREDICTED:-ankyrin-repeat-and-protein-kinase-domain-containing-protein-1-[Ficedula-albicollis]	XP_023282077.1-caspase-2-isoform-X4-[Seriola-lalandi-dorsalis]	XP_032610857.1-caspase-8-isoform-X2-[Hylobates-moloch]	XP_035413329.1-caspase-9-[Cygnus-atratus]	XP_004942667.2-caspase-10-[Gallus-gallus]	XP_055436549.1-FAS-associated-death-domain-protein-[Bubalus-carabanensis]	XP_026640203.1-TIR-domain-containing-adapter-molecule-1-[Microtus-ochrogaster]	XP_051576142.1-nucleotide-binding-oligomerization-domain-containing-protein-1-like-isoform-X3-[Myxocyprinus-asiaticus]	XP_025226648.1-nucleotide-binding-oligomerization-domain-containing-protein-2-isoform-X2-[Theropithecus-gelada] (2)	XP_024233964.1-interferon-regulatory-factor-6-[Oncorhynchus-tshawytscha]
XP_004402210.1-PREDICTED:-receptor-interacting-serine/threonine-protein-kinase-3-[Odobenus-rosmarus-divergens]	XP_003806216.3-Z-DNA-binding-protein-1-isoform-X8-[Pan-paniscus] (2)	XP_003481839.3-mixed-lineage-kinase-domain-like-protein-[Sus-scrofa]	XP_011749073.1-receptor-interacting-serine/threonine-protein-kinase-1-isoform-X3-[Macaca-nemestrina]	XP_017652247.1-receptor-interacting-serine/threonine-protein-kinase-2-isoform-X2-[Nannospalax-galili]	XP_043339654.1-receptor-interacting-serine/threonine-protein-kinase-2-[Cervus-canadensis]	XP_051627242.1-receptor-interacting-serine/threonine-protein-kinase-2-like-[Manacus-candei]	XP_033955133.1-receptor-interacting-serine/threonine-protein-kinase-4-[Pseudochaenichthys-georgianus]	XP_012585387.1-PREDICTED:-LOW-QUALITY-PROTEIN:-ankyrin-repeat-and-protein-kinase-domain-containing-protein-1-[Condylura-cristata]	XP_028436771.1-caspase-2-isoform-X5-[Perca-flavescens]	XP_038278000.1-caspase-8-like-isoform-X2-[Dermochelys-coriacea]	XP_040389220.1-caspase-9-[Cygnus-olor]	XP_045874724.1-LOW-QUALITY-PROTEIN:-caspase-10-[Meles-meles]	XP_036717424.1-FAS-associated-death-domain-protein-isoform-X4-[Balaenoptera-musculus]	XP_057182036.1-TIR-domain-containing-adapter-molecule-1-[Triplophysa-rosa]	XP_051576139.1-nucleotide-binding-oligomerization-domain-containing-protein-1-like-isoform-X1-[Myxocyprinus-asiaticus]	XP_050630742.1-nucleotide-binding-oligomerization-domain-containing-protein-2-isoform-X1-[Macaca-thibetana-thibetana]	XP_029539189.1-interferon-regulatory-factor-6-like-[Oncorhynchus-nerka]
XP_012611511.1-receptor-interacting-serine/threonine-protein-kinase-3-isoform-X2-[Microcebus-murinus]	XP_004062475.2-Z-DNA-binding-protein-1-isoform-X6-[Gorilla-gorilla-gorilla] (2)	XP_057569610.1-mixed-lineage-kinase-domain-like-protein-isoform-X1-[Hippopotamus-amphibius-kiboko]	XP_011938837.1-PREDICTED:-receptor-interacting-serine/threonine-protein-kinase-1-isoform-X4-[Cercocebus-atys]	XP_029582149.1-receptor-interacting-serine/threonine-protein-kinase-2-like-isoform-X1-[Salmo-trutta]	XP_001488774.1-receptor-interacting-serine/threonine-protein-kinase-2-isoform-X2-[Equus-caballus]	XP_005306352.1-receptor-interacting-serine/threonine-protein-kinase-2-like-isoform-X1-[Chrysemys-picta-bellii]	XP_048202166.1-LOW-QUALITY-PROTEIN:-receptor-interacting-serine/threonine-protein-kinase-4-[Perognathus-longimembris-pacificus]	XP_040048387.1-ankyrin-repeat-and-protein-kinase-domain-containing-protein-1-isoform-X2-[Gasterosteus-aculeatus-aculeatus]	XP_026173302.1-caspase-2-isoform-X2-[Mastacembelus-armatus]	XP_036783969.1-caspase-8-isoform-X1-[Manis-pentadactyla]	XP_047923261.1-caspase-9-isoform-X1-[Anser-cygnoides]	XP_042072132.1-caspase-8-isoform-X2-[Haplochromis-burtoni]	XP_023682826.1-FAS-associated-death-domain-protein-[Paramormyrops-kingsleyae]	XP_055473703.1-TIR-domain-containing-adapter-molecule-1-[Psammomys-obesus]	XP_051576140.1-nucleotide-binding-oligomerization-domain-containing-protein-1-like-isoform-X2-[Myxocyprinus-asiaticus]	XP_050630743.1-nucleotide-binding-oligomerization-domain-containing-protein-2-isoform-X2-[Macaca-thibetana-thibetana]	XP_046168250.1-interferon-regulatory-factor-6-like-[Oncorhynchus-gorbuscha]
XP_006988649.1-receptor-interacting-serine/threonine-protein-kinase-3-[Peromyscus-maniculatus-bairdii]	NP_001153890.1-Z-DNA-binding-protein-1-isoform-c-[Homo-sapiens] (2)	XP_057569613.1-mixed-lineage-kinase-domain-like-protein-isoform-X2-[Hippopotamus-amphibius-kiboko]	XP_020033577.1-receptor-interacting-serine/threonine-protein-kinase-1-[Castor-canadensis]	XP_020725682.1-receptor-interacting-serine/threonine-protein-kinase-2-[Odocoileus-virginianus-texanus]	XP_036193403.1-receptor-interacting-serine/threonine-protein-kinase-2-isoform-X2-[Myotis-myotis]	XP_033013123.1-receptor-interacting-serine/threonine-protein-kinase-2-like-isoform-X2-[Lacerta-agilis]	XP_001134659.1-receptor-interacting-serine/threonine-protein-kinase-4-isoform-X1-[Pan-troglodytes]	XP_011606721.2-ankyrin-repeat-and-protein-kinase-domain-containing-protein-1-[Takifugu-rubripes]	XP_026265186.1-caspase-2-isoform-X4-[Urocitellus-parryii]	XP_045703622.1-caspase-8-isoform-X3-[Phyllostomus-hastatus]	XP_047923263.1-caspase-9-isoform-X3-[Anser-cygnoides]	XP_004458966.2-caspase-10-isoform-X1-[Dasypus-novemcinctus]	XP_008591552.1-PREDICTED:-caspase-10-like,-partial-[Galeopterus-variegatus]	XP_030322340.1-TIR-domain-containing-adapter-molecule-1-[Calypte-anna]	XP_052002754.1-nucleotide-binding-oligomerization-domain-containing-protein-1-like-[Xyrauchen-texanus]	XP_014981593.2-nucleotide-binding-oligomerization-domain-containing-protein-2-[Macaca-mulatta] (2)	XP_035633640.1-interferon-regulatory-factor-6-like-[Oncorhynchus-keta]
XP_024155342.1-receptor-interacting-serine/threonine-protein-kinase-3-[Oryzias-melastigma]	XP_047296482.1-Z-DNA-binding-protein-1-isoform-X3-[Homo-sapiens] (2)	XP_015097400.1-mixed-lineage-kinase-domain-like-protein-isoform-X2-[Vicugna-pacos]	XP_009977984.1-PREDICTED:-receptor-interacting-serine/threonine-protein-kinase-1-[Tauraco-erythrolophus]	XP_051054567.1-receptor-interacting-serine/threonine-protein-kinase-2-isoform-X1-[Phodopus-roborovskii]	XP_014113710.1-PREDICTED:-receptor-interacting-serine/threonine-protein-kinase-2-isoform-X2-[Pseudopodoces-humilis]	XP_008636996.1-PREDICTED:-receptor-interacting-serine/threonine-protein-kinase-2-[Corvus-brachyrhynchos]	XP_043557311.1-receptor-interacting-serine/threonine-protein-kinase-4-[Chiloscyllium-plagiosum]	XP_010180234.1-PREDICTED:-ankyrin-repeat-and-protein-kinase-domain-containing-protein-1-[Mesitornis-unicolor]	XP_051262053.1-caspase-2-isoform-X5-[Dicentrarchus-labrax]	XP_006889144.1-PREDICTED:-caspase-8-isoform-X1-[Elephantulus-edwardii]	XP_046787371.1-LOW-QUALITY-PROTEIN:-caspase-9-[Gallus-gallus]	XP_027729487.1-caspase-10-isoform-X3-[Vombatus-ursinus]	XP_045631795.1-FAS-associated-death-domain-protein-[Ursus-americanus]	XP_010137501.1-PREDICTED:-TIR-domain-containing-adapter-molecule-1-[Buceros-rhinoceros-silvestris]	XP_051575112.1-nucleotide-binding-oligomerization-domain-containing-protein-1-like-[Myxocyprinus-asiaticus]	XP_035137618.1-nucleotide-binding-oligomerization-domain-containing-protein-2-isoform-X2-[Callithrix-jacchus]	XP_041747309.2-interferon-regulatory-factor-6-like-[Coregonus-clupeaformis]
XP_026872337.2-receptor-interacting-serine/threonine-protein-kinase-3-like-isoform-X2-[Electrophorus-electricus]	XP_054180058.1-Z-DNA-binding-protein-1-isoform-X2-[Homo-sapiens] (2)	XP_031536686.1-mixed-lineage-kinase-domain-like-protein-isoform-X1-[Vicugna-pacos]	XP_034366050.1-receptor-interacting-serine/threonine-protein-kinase-1-isoform-X1-[Arvicanthis-niloticus]	XP_025910332.1-receptor-interacting-serine/threonine-protein-kinase-2-isoform-X1-[Nothoprocta-perdicaria]	XP_051552867.1-receptor-interacting-serine/threonine-protein-kinase-2-like-[Myxocyprinus-asiaticus]	XP_014373170.1-receptor-interacting-serine/threonine-protein-kinase-2-like-[Alligator-sinensis]	XP_051973421.1-receptor-interacting-serine/threonine-protein-kinase-4-like-[Xyrauchen-texanus]	XP_004416436.1-PREDICTED:-LOW-QUALITY-PROTEIN:-ankyrin-repeat-and-protein-kinase-domain-containing-protein-1-[Odobenus-rosmarus-divergens]	XP_034952912.1-caspase-2-isoform-X1-[Zootoca-vivipara]	XP_006921414.1-caspase-8-[Pteropus-alecto]	XP_046759217.1-LOW-QUALITY-PROTEIN:-caspase-9-[Gallus-gallus]	XP_027797662.1-caspase-10-[Marmota-flaviventris]	XP_039604796.1-protein-FADD-[Polypterus-senegalus]	XP_040393437.1-TIR-domain-containing-adapter-molecule-1-[Cygnus-olor]	XP_002665106.3-nucleotide-binding-oligomerization-domain-containing-protein-1-[Danio-rerio]	XP_035137617.1-nucleotide-binding-oligomerization-domain-containing-protein-2-isoform-X1-[Callithrix-jacchus]	XP_036839544.1-interferon-regulatory-factor-6-isoform-X1-[Oncorhynchus-mykiss]
XP_035970617.1-receptor-interacting-serine/threonine-protein-kinase-3-isoform-X2-[Halichoerus-grypus]	XP_047296481.1-Z-DNA-binding-protein-1-isoform-X2-[Homo-sapiens] (2)	XP_010965427.1-mixed-lineage-kinase-domain-like-protein-isoform-X2-[Camelus-bactrianus]	XP_045407546.1-receptor-interacting-serine/threonine-protein-kinase-1-isoform-X2-[Lemur-catta]	XP_035886996.1-receptor-interacting-serine/threonine-protein-kinase-2-isoform-X3-[Phyllostomus-discolor]	XP_044280433.1-receptor-interacting-serine/threonine-protein-kinase-2-isoform-X1-[Varanus-komodoensis]	XP_026712703.1-receptor-interacting-serine/threonine-protein-kinase-2-like-isoform-X3-[Athene-cunicularia]	XP_033798200.1-receptor-interacting-serine/threonine-protein-kinase-4-isoform-X2-[Geotrypetes-seraphini]	XP_038154474.1-ankyrin-repeat-and-protein-kinase-domain-containing-protein-1-isoform-X2-[Cyprinodon-tularosa]	XP_048196350.1-caspase-2-isoform-X2-[Perognathus-longimembris-pacificus]	XP_005070663.1-caspase-8-isoform-X1-[Mesocricetus-auratus]	XP_015737946.1-caspase-9-[Coturnix-japonica]	XP_048056551.1-caspase-8-like-isoform-X3-[Megalobrama-amblycephala]	XP_028257344.1-FAS-associated-death-domain-protein-like-[Parambassis-ranga]	XP_033811188.1-TIR-domain-containing-adapter-molecule-1-[Geotrypetes-seraphini]	XP_056331088.1-nucleotide-binding-oligomerization-domain-containing-protein-1-[Danio-aesculapii]	XP_035137619.1-nucleotide-binding-oligomerization-domain-containing-protein-2-isoform-X3-[Callithrix-jacchus]	XP_021465590.2-interferon-regulatory-factor-6-isoform-X2-[Oncorhynchus-mykiss]
XP_030282042.1-receptor-interacting-serine/threonine-protein-kinase-3-like-isoform-X2-[Sparus-aurata]	XP_055228531.1-Z-DNA-binding-protein-1-isoform-X4-[Gorilla-gorilla-gorilla] (2)	XP_045360937.1-mixed-lineage-kinase-domain-like-protein-isoform-X1-[Camelus-bactrianus]	XP_038573852.1-receptor-interacting-serine/threonine-protein-kinase-1-isoform-X1-[Micropterus-salmoides]	XP_012423458.1-PREDICTED:-receptor-interacting-serine/threonine-protein-kinase-2-isoform-X1-[Odobenus-rosmarus-divergens]	XP_044101293.1-receptor-interacting-serine/threonine-protein-kinase-2-[Neogale-vison]	XP_029623019.1-receptor-interacting-serine/threonine-protein-kinase-2-like-isoform-X1-[Salmo-trutta]	XP_029876846.1-receptor-interacting-serine/threonine-protein-kinase-4-[Aquila-chrysaetos-chrysaetos]	XP_027268117.1-ankyrin-repeat-and-protein-kinase-domain-containing-protein-1-[Cricetulus-griseus]	XP_005157976.1-caspase-2-isoform-X1-[Danio-rerio]	XP_004393524.1-PREDICTED:-caspase-8-isoform-X3-[Odobenus-rosmarus-divergens]	XP_031469299.1-caspase-9-[Phasianus-colchicus]	XP_025963532.1-caspase-10-isoform-X1-[Dromaius-novaehollandiae]	XP_015256299.1-PREDICTED:-FAS-associated-death-domain-protein-like-[Cyprinodon-variegatus]	XP_032756639.1-TIR-domain-containing-adapter-molecule-1-[Rattus-rattus]	XP_056115435.1-nucleotide-binding-oligomerization-domain-containing-protein-1-[Rhinichthys-klamathensis-goyatoka] (2)	XP_010346141.1-nucleotide-binding-oligomerization-domain-containing-protein-2-isoform-X2-[Saimiri-boliviensis-boliviensis]	XP_035614267.1-interferon-regulatory-factor-6-like-[Oncorhynchus-keta]
XP_035499095.1-receptor-interacting-serine/threonine-protein-kinase-3-isoform-X1-[Scophthalmus-maximus]	XP_034803094.2-Z-DNA-binding-protein-1-isoform-X6-[Pan-paniscus] (2)	XP_031313937.1-mixed-lineage-kinase-domain-like-protein-isoform-X1-[Camelus-dromedarius]	XP_006909368.1-receptor-interacting-serine/threonine-protein-kinase-1-[Pteropus-alecto]	XP_019958353.1-PREDICTED:-receptor-interacting-serine/threonine-protein-kinase-2-isoform-X2-[Paralichthys-olivaceus]	XP_028727462.1-receptor-interacting-serine/threonine-protein-kinase-2-isoform-X1-[Peromyscus-leucopus]	XP_009897466.1-PREDICTED:-receptor-interacting-serine/threonine-protein-kinase-2-like-[Dryobates-pubescens]	XP_004264626.1-receptor-interacting-serine/threonine-protein-kinase-4-[Orcinus-orca]	XP_030077772.1-ankyrin-repeat-and-protein-kinase-domain-containing-protein-1-[Microcaecilia-unicolor]	XP_053897108.1-caspase-2-isoform-X4-[Malaclemys-terrapin-pileata]	XP_048284741.1-caspase-8-isoform-X1-[Myodes-glareolus]	XP_048823573.1-caspase-9-[Lagopus-muta]	XP_023698343.1-caspase-8-like-isoform-X1-[Paramormyrops-kingsleyae]	XP_036918469.1-FAS-associated-death-domain-protein-[Sturnira-hondurensis]	XP_054889829.1-TIR-domain-containing-adapter-molecule-1-[Poeciliopsis-prolifica]	XP_039516863.1-nucleotide-binding-oligomerization-domain-containing-protein-1-[Pimephales-promelas]	XP_010346138.1-nucleotide-binding-oligomerization-domain-containing-protein-2-isoform-X1-[Saimiri-boliviensis-boliviensis]	XP_029533231.1-LOW-QUALITY-PROTEIN:-interferon-regulatory-factor-6-like-[Oncorhynchus-nerka]
XP_051555319.1-receptor-interacting-serine/threonine-protein-kinase-3-like-isoform-X5-[Myxocyprinus-asiaticus]	XP_003806215.3-Z-DNA-binding-protein-1-isoform-X3-[Pan-paniscus] (2)	XP_010985397.1-mixed-lineage-kinase-domain-like-protein-isoform-X2-[Camelus-dromedarius]	XP_015421201.1-PREDICTED:-receptor-interacting-serine/threonine-protein-kinase-1-[Myotis-davidii]	XP_032105652.1-receptor-interacting-serine/threonine-protein-kinase-2-isoform-X1-[Sapajus-apella]	XP_049889510.1-receptor-interacting-serine/threonine-protein-kinase-2-like-[Epinephelus-moara]	XP_040426731.1-receptor-interacting-serine/threonine-protein-kinase-2-like-isoform-X2-[Cygnus-olor]	XP_032909350.1-receptor-interacting-serine/threonine-protein-kinase-4-[Catharus-ustulatus]	XP_003910769.4-LOW-QUALITY-PROTEIN:-ankyrin-repeat-and-protein-kinase-domain-containing-protein-1-[Papio-anubis]	XP_016852433.1-PREDICTED:-caspase-2-isoform-X2-[Anolis-carolinensis]	XP_047401950.1-caspase-8-isoform-X1-[Sciurus-carolinensis]	XP_052548010.1-caspase-9-isoform-X2-[Tympanuchus-pallidicinctus]	XP_032968882.1-LOW-QUALITY-PROTEIN:-caspase-10-[Rhinolophus-ferrumequinum]	XP_003505753.1-FAS-associated-death-domain-protein-isoform-X1-[Cricetulus-griseus]	XP_014808292.1-PREDICTED:-TIR-domain-containing-adapter-molecule-1-like-[Calidris-pugnax]	XP_051720971.1-LOW-QUALITY-PROTEIN:-nucleotide-binding-oligomerization-domain-containing-protein-1-[Ctenopharyngodon-idella]	XP_032111587.1-nucleotide-binding-oligomerization-domain-containing-protein-2-isoform-X1-[Sapajus-apella]	XP_020339032.1-interferon-regulatory-factor-6-isoform-X1-[Oncorhynchus-kisutch]
XP_024659098.1-receptor-interacting-serine/threonine-protein-kinase-3-isoform-X3-[Maylandia-zebra]	XP_001170447.2-Z-DNA-binding-protein-1-isoform-X1-[Pan-troglodytes] (2)	XP_014410130.2-mixed-lineage-kinase-domain-like-protein-isoform-X2-[Camelus-ferus]	XP_019398138.1-PREDICTED:-receptor-interacting-serine/threonine-protein-kinase-1-isoform-X2-[Crocodylus-porosus]	XP_049453470.1-receptor-interacting-serine/threonine-protein-kinase-2-like-[Epinephelus-fuscoguttatus]	XP_042642054.1-receptor-interacting-serine/threonine-protein-kinase-2-[Tyto-alba]	XP_010198859.1-PREDICTED:-receptor-interacting-serine/threonine-protein-kinase-2-like-[Colius-striatus]	XP_042588838.1-receptor-interacting-serine/threonine-protein-kinase-4-[Cyprinus-carpio]	XP_019608866.1-PREDICTED:-ankyrin-repeat-and-protein-kinase-domain-containing-protein-1-[Rhinolophus-sinicus]	XP_031155382.1-caspase-2-isoform-X9-[Sander-lucioperca]	XP_054535200.1-caspase-8-isoform-X12-[Pan-troglodytes]	XP_052548009.1-caspase-9-isoform-X1-[Tympanuchus-pallidicinctus]	XP_051987081.1-caspase-8-isoform-X1-[Xyrauchen-texanus]	NP_001373289.1-protein-FADD-[Danio-rerio]	XP_039205221.1-TIR-domain-containing-adapter-molecule-1-like-[Crotalus-tigris]	XP_048008679.1-nucleotide-binding-oligomerization-domain-containing-protein-1-[Megalobrama-amblycephala]	XP_032111588.1-nucleotide-binding-oligomerization-domain-containing-protein-2-isoform-X2-[Sapajus-apella]	XP_024283055.1-interferon-regulatory-factor-6-[Oncorhynchus-tshawytscha]
XP_031723342.1-receptor-interacting-serine/threonine-protein-kinase-3-like-isoform-X3-[Anarrhichthys-ocellatus]	XP_009435730.2-Z-DNA-binding-protein-1-isoform-X2-[Pan-troglodytes] (2)	XP_032342629.1-mixed-lineage-kinase-domain-like-protein-isoform-X1-[Camelus-ferus]	XP_051557113.1-receptor-interacting-serine/threonine-protein-kinase-1-like-[Myxocyprinus-asiaticus]	XP_030812044.1-receptor-interacting-serine/threonine-protein-kinase-2-like-[Camarhynchus-parvulus]	XP_023373675.1-receptor-interacting-serine/threonine-protein-kinase-2-isoform-X1-[Otolemur-garnettii]	XP_031665188.1-receptor-interacting-serine/threonine-protein-kinase-2-isoform-X4-[Oncorhynchus-kisutch]	XP_004696975.1-receptor-interacting-serine/threonine-protein-kinase-4-[Echinops-telfairi]	XP_036921527.1-ankyrin-repeat-and-protein-kinase-domain-containing-protein-1-isoform-X1-[Sturnira-hondurensis]	XP_052345192.1-caspase-2-like-[Oncorhynchus-keta]	XP_035187965.1-caspase-8-like-[Oxyura-jamaicensis]	XP_010721334.2-caspase-9-[Meleagris-gallopavo]	XP_042581513.1-caspase-8-[Cyprinus-carpio]	XP_052416275.1-FAS-associated-death-domain-protein-[Carassius-gibelio]	XP_028449138.1-TIR-domain-containing-adapter-molecule-1-like-[Perca-flavescens]	XP_043116333.1-nucleotide-binding-oligomerization-domain-containing-protein-1-[Puntigrus-tetrazona]	XP_032111590.1-nucleotide-binding-oligomerization-domain-containing-protein-2-isoform-X4-[Sapajus-apella]	XP_020339033.1-interferon-regulatory-factor-6-isoform-X2-[Oncorhynchus-kisutch]
XP_026154501.1-receptor-interacting-serine/threonine-protein-kinase-3-like-isoform-X2-[Mastacembelus-armatus]	XP_008949021.3-Z-DNA-binding-protein-1-isoform-X4-[Pan-paniscus] (2)	XP_043292628.1-mixed-lineage-kinase-domain-like-protein-isoform-X2-[Cervus-canadensis]	XP_041040091.1-receptor-interacting-serine/threonine-protein-kinase-1-[Carcharodon-carcharias]	XP_033790434.1-receptor-interacting-serine/threonine-protein-kinase-2-isoform-X1-[Geotrypetes-seraphini]	XP_026062629.1-receptor-interacting-serine/threonine-protein-kinase-2-like-isoform-X2-[Carassius-auratus]	XP_035592326.1-receptor-interacting-serine/threonine-protein-kinase-2-like-isoform-X2-[Oncorhynchus-keta]	XP_028655967.1-receptor-interacting-serine/threonine-protein-kinase-4-[Erpetoichthys-calabaricus]	XP_020017161.1-ankyrin-repeat-and-protein-kinase-domain-containing-protein-1-[Castor-canadensis]	XP_048677498.1-caspase-2-isoform-X2-[Caretta-caretta]	XP_022349089.1-caspase-8-isoform-X4-[Enhydra-lutris-kenyoni]	XP_021272957.1-caspase-9-[Numida-meleagris]	XP_005921510.1-caspase-8-isoform-X2-[Haplochromis-burtoni]	XP_028439028.1-FAS-associated-death-domain-protein-[Perca-flavescens]	XP_031545535.1-TIR-domain-containing-adapter-molecule-1-[Vicugna-pacos]	XP_050987432.1-nucleotide-binding-oligomerization-domain-containing-protein-1-[Labeo-rohita]	XP_017385622.1-nucleotide-binding-oligomerization-domain-containing-protein-2-isoform-X4-[Cebus-imitator]	XP_029549908.1-LOW-QUALITY-PROTEIN:-interferon-regulatory-factor-6-like-[Salmo-trutta]
XP_040209259.1-receptor-interacting-serine/threonine-protein-kinase-3-isoform-X4-[Rana-temporaria]	XP_047296483.1-Z-DNA-binding-protein-1-isoform-X4-[Homo-sapiens] (2)	XP_043292624.1-mixed-lineage-kinase-domain-like-protein-isoform-X1-[Cervus-canadensis]	XP_041904996.1-receptor-interacting-serine/threonine-protein-kinase-1-isoform-X1-[Corvus-kubaryi]	XP_024247754.1-receptor-interacting-serine/threonine-protein-kinase-2-[Oncorhynchus-tshawytscha]	XP_051054567.1-receptor-interacting-serine/threonine-protein-kinase-2-isoform-X1-[Phodopus-roborovskii]	XP_024274434.2-receptor-interacting-serine/threonine-protein-kinase-2-[Oncorhynchus-tshawytscha]	XP_033930327.1-receptor-interacting-serine/threonine-protein-kinase-4-[Melopsittacus-undulatus]	XP_003498589.2-ankyrin-repeat-and-protein-kinase-domain-containing-protein-1-[Cricetulus-griseus]	XP_037847123.1-caspase-2-isoform-X2-[Chlorocebus-sabaeus]	XP_040459431.1-caspase-8-like-isoform-X1-[Falco-naumanni]	XP_025906929.1-caspase-9-[Nothoprocta-perdicaria]	XP_030637053.1-caspase-8-like-[Chanos-chanos]	XP_024148973.1-uncharacterized-protein-zgc:174906-isoform-X4-[Oryzias-melastigma]	XP_031803669.1-TIR-domain-containing-adapter-molecule-1-isoform-X1-[Sarcophilus-harrisii]	XP_058602048.1-nucleotide-binding-oligomerization-domain-containing-protein-1-[Onychostoma-macrolepis] (2)	XP_017385618.1-nucleotide-binding-oligomerization-domain-containing-protein-2-isoform-X1-[Cebus-imitator] (2)	XP_014022332.1-interferon-regulatory-factor-6-[Salmo-salar]
XP_021059449.1-receptor-interacting-serine/threonine-protein-kinase-3-[Mus-pahari]	XP_004062474.2-Z-DNA-binding-protein-1-isoform-X2-[Gorilla-gorilla-gorilla] (2)	XP_043753988.1-mixed-lineage-kinase-domain-like-protein-isoform-X2-[Cervus-elaphus]	XP_051711864.1-receptor-interacting-serine/threonine-protein-kinase-1-isoform-X2-[Oryctolagus-cuniculus]	XP_012578279.1-PREDICTED:-receptor-interacting-serine/threonine-protein-kinase-2-[Condylura-cristata]	XP_037237153.1-receptor-interacting-serine/threonine-protein-kinase-2-[Falco-rusticolus]	XP_009555412.1-PREDICTED:-receptor-interacting-serine/threonine-protein-kinase-2-like-[Cuculus-canorus]	XP_020477711.1-receptor-interacting-serine/threonine-protein-kinase-4-[Monopterus-albus]	XP_008830975.1-ankyrin-repeat-and-protein-kinase-domain-containing-protein-1-[Nannospalax-galili]	XP_032836747.1-caspase-2-[Petromyzon-marinus]	XP_039925761.1-caspase-8-like-[Hirundo-rustica]	XP_025923190.1-caspase-9,-partial-[Apteryx-rowi]	XP_024420020.2-caspase-10-[Desmodus-rotundus]	XP_058257656.1-protein-FADD-[Hemibagrus-wyckioides]	XP_032085783.1-TIR-domain-containing-adapter-molecule-1-[Thamnophis-elegans]	XP_059364565.1-nucleotide-binding-oligomerization-domain-containing-protein-1-[Carassius-carassius]	XP_017385620.1-nucleotide-binding-oligomerization-domain-containing-protein-2-isoform-X2-[Cebus-imitator] (2)	XP_023992296.1-interferon-regulatory-factor-6-[Salvelinus-alpinus]
XP_042327391.1-receptor-interacting-serine/threonine-protein-kinase-3-isoform-X1-[Sceloporus-undulatus]	NP_001153889.1-Z-DNA-binding-protein-1-isoform-b-[Homo-sapiens] (2)	XP_043753983.1-mixed-lineage-kinase-domain-like-protein-isoform-X1-[Cervus-elaphus]	XP_016415398.1-PREDICTED:-receptor-interacting-serine/threonine-protein-kinase-1-like-isoform-X1-[Sinocyclocheilus-rhinocerous]	XP_046707151.1-receptor-interacting-serine/threonine-protein-kinase-2-[Silurus-meridionalis]	XP_051641062.1-receptor-interacting-serine/threonine-protein-kinase-2-isoform-X2-[Manacus-candei]	XP_013047866.1-receptor-interacting-serine/threonine-protein-kinase-2-like-isoform-X1-[Anser-cygnoides]	XP_037403248.1-receptor-interacting-serine/threonine-protein-kinase-4-[Pygocentrus-nattereri]	XP_049431534.1-ankyrin-repeat-and-protein-kinase-domain-containing-protein-1-[Epinephelus-fuscoguttatus]	XP_049750000.1-caspase-2-isoform-X3-[Elephas-maximus-indicus]	XP_030341504.1-caspase-8-like-[Strigops-habroptila]	XP_009687912.1-PREDICTED:-caspase-9-[Struthio-camelus-australis]	XP_011615013.2-caspase-8-[Takifugu-rubripes]	XP_021779567.1-caspase-10-isoform-X3-[Papio-anubis]	XP_027877518.1-TIR-domain-containing-adapter-molecule-1-like-[Xiphophorus-couchianus]	XP_026083641.1-nucleotide-binding-oligomerization-domain-containing-protein-1-like-[Carassius-auratus]	XP_047384580.1-nucleotide-binding-oligomerization-domain-containing-protein-2-isoform-X2-[Sciurus-carolinensis] (2)	XP_038871885.1-interferon-regulatory-factor-6-like-[Salvelinus-namaycush]
XP_037624664.1-receptor-interacting-serine/threonine-protein-kinase-3-like-[Sebastes-umbrosus]	NP_110403.2-Z-DNA-binding-protein-1-isoform-a-[Homo-sapiens] (2)	XP_020744846.1-mixed-lineage-kinase-domain-like-protein-[Odocoileus-virginianus-texanus]	XP_015710132.1-receptor-interacting-serine/threonine-protein-kinase-1-[Coturnix-japonica]	XP_020944798.1-receptor-interacting-serine/threonine-protein-kinase-2-isoform-X1-[Sus-scrofa]	XP_006787077.1-receptor-interacting-serine/threonine-protein-kinase-2-like-[Neolamprologus-brichardi]	XP_036400474.1-receptor-interacting-serine/threonine-protein-kinase-2-[Megalops-cyprinoides]	XP_034407002.1-receptor-interacting-serine/threonine-protein-kinase-4-[Cyclopterus-lumpus]	XP_012864943.1-PREDICTED:-ankyrin-repeat-and-protein-kinase-domain-containing-protein-1-[Dipodomys-ordii]	XP_016050933.1-PREDICTED:-caspase-2-isoform-X3-[Miniopterus-natalensis]	XP_003207543.1-caspase-8-like-[Meleagris-gallopavo]	XP_006037744.1-caspase-9-[Alligator-sinensis]	XP_042353588.1-caspase-8-[Plectropomus-leopardus]	XP_040265030.1-FAS-associated-death-domain-protein-[Bufo-bufo]	XP_037644193.1-TIR-domain-containing-adapter-molecule-1-[Sebastes-umbrosus]	XP_052473745.1-nucleotide-binding-oligomerization-domain-containing-protein-1-[Carassius-gibelio] (2)	XP_047384578.1-nucleotide-binding-oligomerization-domain-containing-protein-2-isoform-X1-[Sciurus-carolinensis]	XP_058860249.1-interferon-regulatory-factor-6-like-[Acipenser-ruthenus]
XP_042267934.1-receptor-interacting-serine/threonine-protein-kinase-3-like-[Thunnus-maccoyii]	XP_054180056.1-Z-DNA-binding-protein-1-isoform-X5-[Homo-sapiens] (2)	XP_055269116.1-mixed-lineage-kinase-domain-like-protein-isoform-X3-[Moschus-berezovskii]	XP_014046511.2-LOW-QUALITY-PROTEIN:-receptor-interacting-serine/threonine-protein-kinase-1-[Salmo-salar]	XP_020442406.1-receptor-interacting-serine/threonine-protein-kinase-2-isoform-X1-[Monopterus-albus]	XP_034470667.1-receptor-interacting-serine/threonine-protein-kinase-2-like-isoform-X4-[Hippoglossus-hippoglossus]	XP_036443285.1-receptor-interacting-serine/threonine-protein-kinase-2-[Colossoma-macropomum]	XP_009471854.1-PREDICTED:-receptor-interacting-serine/threonine-protein-kinase-4-[Nipponia-nippon]	XP_028666135.1-ankyrin-repeat-and-protein-kinase-domain-containing-protein-1-isoform-X1-[Erpetoichthys-calabaricus]	XP_044858399.1-caspase-2-isoform-X1-[Mauremys-mutica]	XP_010165008.1-caspase-8-[Antrostomus-carolinensis]	XP_019355521.1-PREDICTED:-caspase-9-isoform-X1-[Alligator-mississippiensis]	XP_035605899.1-caspase-8-isoform-X1-[Oncorhynchus-keta]	XP_006911354.1-FAS-associated-death-domain-protein-[Pteropus-alecto]	XP_034974859.1-TIR-domain-containing-adapter-molecule-1-[Zootoca-vivipara]	XP_026083650.1-nucleotide-binding-oligomerization-domain-containing-protein-1-like-[Carassius-auratus]	XP_047384581.1-nucleotide-binding-oligomerization-domain-containing-protein-2-isoform-X3-[Sciurus-carolinensis] (2)	XP_034763649.2-interferon-regulatory-factor-6-like-[Acipenser-ruthenus]
XP_032816534.1-receptor-interacting-serine/threonine-protein-kinase-4-like-isoform-X2-[Petromyzon-marinus]	XP_011833570.1-PREDICTED:-Z-DNA-binding-protein-1-[Mandrillus-leucophaeus] (2)	XP_055269115.1-mixed-lineage-kinase-domain-like-protein-isoform-X2-[Moschus-berezovskii]	XP_052405314.1-receptor-interacting-serine/threonine-protein-kinase-1-like-[Carassius-gibelio]	XP_034644476.1-receptor-interacting-serine/threonine-protein-kinase-2-like-[Trachemys-scripta-elegans]	XP_036088636.1-receptor-interacting-serine/threonine-protein-kinase-2-isoform-X2-[Rousettus-aegyptiacus]	XP_030368072.1-receptor-interacting-serine/threonine-protein-kinase-2-like-isoform-X2-[Strigops-habroptila]	XP_035999343.1-receptor-interacting-serine/threonine-protein-kinase-4-[Fundulus-heteroclitus]	XP_013366717.1-PREDICTED:-ankyrin-repeat-and-protein-kinase-domain-containing-protein-1-isoform-X2-[Chinchilla-lanigera]	XP_031311387.1-caspase-2-isoform-X3-[Camelus-dromedarius]	XP_032210313.1-caspase-8-isoform-X1-[Mustela-erminea]	XP_006266038.1-PREDICTED:-caspase-9-isoform-X2-[Alligator-mississippiensis]	XP_055722455.1-caspase-8-like-isoform-X2-[Salvelinus-fontinalis]	XP_017159349.1-PREDICTED:-FAS-associated-death-domain-protein,-partial-[Poecilia-reticulata]	XP_005531673.2-PREDICTED:-TIR-domain-containing-adapter-molecule-1-[Pseudopodoces-humilis]	XP_042629217.1-LOW-QUALITY-PROTEIN:-nucleotide-binding-oligomerization-domain-containing-protein-1-[Cyprinus-carpio] (2)	XP_040135890.1-nucleotide-binding-oligomerization-domain-containing-protein-2-isoform-X2-[Ictidomys-tridecemlineatus]	XP_041084863.1-interferon-regulatory-factor-6-like-[Polyodon-spathula]
XP_037690602.1-receptor-interacting-serine/threonine-protein-kinase-3-[Choloepus-didactylus]	XP_050601556.1-Z-DNA-binding-protein-1-isoform-X3-[Macaca-thibetana-thibetana] (2)	XP_055269114.1-mixed-lineage-kinase-domain-like-protein-isoform-X1-[Moschus-berezovskii]	XP_052636036.1-receptor-interacting-serine/threonine-protein-kinase-1-[Harpia-harpyja]	XP_047444473.1-receptor-interacting-serine/threonine-protein-kinase-2-like-isoform-X2-[Mugil-cephalus]	XP_008106622.1-PREDICTED:-receptor-interacting-serine/threonine-protein-kinase-2-[Anolis-carolinensis]	XP_021462710.2-receptor-interacting-serine/threonine-protein-kinase-2-isoform-X1-[Oncorhynchus-mykiss]	XP_019379426.1-PREDICTED:-receptor-interacting-serine/threonine-protein-kinase-4,-partial-[Gavialis-gangeticus]	XP_026779858.2-ankyrin-repeat-and-protein-kinase-domain-containing-protein-1-[Pangasianodon-hypophthalmus]	XP_022434765.1-caspase-2-isoform-X3-[Delphinapterus-leucas]	NP_001107832.1-caspase-18-[Monodelphis-domestica]	XP_019397069.1-PREDICTED:-caspase-9-[Crocodylus-porosus]	XP_013996327.2-caspase-8-isoform-X2-[Salmo-salar]	XP_030232742.1-FAS-associated-death-domain-protein-[Gadus-morhua]	XP_055072590.1-TIR-domain-containing-adapter-molecule-1-[Misgurnus-anguillicaudatus]	XP_016369526.1-PREDICTED:-nucleotide-binding-oligomerization-domain-containing-protein-1-[Sinocyclocheilus-rhinocerous] (2)	XP_048648162.1-nucleotide-binding-oligomerization-domain-containing-protein-2-isoform-X5-[Marmota-marmota-marmota] (2)	XP_041083079.1-interferon-regulatory-factor-6-like-[Polyodon-spathula]
XP_011826399.1-PREDICTED:-receptor-interacting-serine/threonine-protein-kinase-3-[Mandrillus-leucophaeus]	XP_045219115.1-Z-DNA-binding-protein-1-isoform-X3-[Macaca-fascicularis] (2)	XP_055408047.1-mixed-lineage-kinase-domain-like-protein-[Bubalus-carabanensis]	XP_016022161.2-receptor-interacting-serine/threonine-protein-kinase-1-[Rousettus-aegyptiacus]	XP_038846927.1-receptor-interacting-serine/threonine-protein-kinase-2-isoform-X2-[Salvelinus-namaycush]	XP_051826768.1-receptor-interacting-serine/threonine-protein-kinase-2-isoform-X2-[Antechinus-flavipes]	XP_017551987.1-receptor-interacting-serine/threonine-protein-kinase-2-[Pygocentrus-nattereri]	XP_011892720.1-PREDICTED:-receptor-interacting-serine/threonine-protein-kinase-4-isoform-X1-[Cercocebus-atys]	XP_010869951.2-ankyrin-repeat-and-protein-kinase-domain-containing-protein-1-isoform-X1-[Esox-lucius]	XP_026041393.1-caspase-2-isoform-X2-[Astatotilapia-calliptera]	NP_989923.3-caspase-8-[Gallus-gallus]	XP_019367434.1-PREDICTED:-caspase-9-[Gavialis-gangeticus]	XP_025260802.1-caspase-10-isoform-X3-[Theropithecus-gelada]	XP_004440117.1-PREDICTED:-FAS-associated-death-domain-protein-like-[Ceratotherium-simum-simum]	XP_005429516.1-TIR-domain-containing-adapter-molecule-1-[Geospiza-fortis]	XP_016149847.1-PREDICTED:-nucleotide-binding-oligomerization-domain-containing-protein-1-[Sinocyclocheilus-grahami] (2)	XP_027794842.1-nucleotide-binding-oligomerization-domain-containing-protein-2-isoform-X3-[Marmota-flaviventris] (2)	XP_006628491.1-PREDICTED:-interferon-regulatory-factor-6-[Lepisosteus-oculatus]
XP_026543457.1-receptor-interacting-serine/threonine-protein-kinase-3-like-[Notechis-scutatus]	XP_011721055.1-Z-DNA-binding-protein-1-isoform-X2-[Macaca-nemestrina] (2)	XP_044788051.2-mixed-lineage-kinase-domain-like-protein-isoform-X1-[Bubalus-bubalis]	XP_031593643.1-receptor-interacting-serine/threonine-protein-kinase-1-isoform-X2-[Oreochromis-aureus]	XP_027004420.1-receptor-interacting-serine/threonine-protein-kinase-2-isoform-X1-[Tachysurus-fulvidraco]	XP_038574348.1-receptor-interacting-serine/threonine-protein-kinase-2-like-isoform-X2-[Micropterus-salmoides]	XP_052318005.1-receptor-interacting-serine/threonine-protein-kinase-2-like-isoform-X1-[Oncorhynchus-keta]	XP_052423454.1-receptor-interacting-serine/threonine-protein-kinase-4-like-[Carassius-gibelio]	XP_004712924.1-ankyrin-repeat-and-protein-kinase-domain-containing-protein-1-[Echinops-telfairi]	XP_037370871.1-caspase-2-isoform-X1-[Talpa-occidentalis]	XP_049678916.1-caspase-8-isoform-X1-[Accipiter-gentilis]	XP_006132789.1-caspase-9-[Pelodiscus-sinensis]	XP_012510737.1-PREDICTED:-caspase-10-[Propithecus-coquereli]	XP_040529199.1-FAS-associated-death-domain-protein-[Gallus-gallus]	XP_036618483.1-TIR-domain-containing-adapter-molecule-1-[Trichosurus-vulpecula]	XP_028831249.1-nucleotide-binding-oligomerization-domain-containing-protein-1-[Denticeps-clupeoides] (2)	XP_046290610.1-nucleotide-binding-oligomerization-domain-containing-protein-2-isoform-X5-[Marmota-monax]	XP_036386871.1-interferon-regulatory-factor-6-[Megalops-cyprinoides]
XP_033490329.1-receptor-interacting-serine/threonine-protein-kinase-3-like-isoform-X1-[Epinephelus-lanceolatus]	XP_008011382.1-Z-DNA-binding-protein-1-[Chlorocebus-sabaeus] (2)	XP_025124184.2-mixed-lineage-kinase-domain-like-protein-isoform-X2-[Bubalus-bubalis]	XP_024104531.1-receptor-interacting-serine/threonine-protein-kinase-1-isoform-X1-[Pongo-abelii]	XP_033699059.1-receptor-interacting-serine/threonine-protein-kinase-2-isoform-X2-[Tursiops-truncatus]	XP_019659424.1-receptor-interacting-serine/threonine-protein-kinase-2-[Ailuropoda-melanoleuca]	XP_045564757.1-receptor-interacting-serine/threonine-protein-kinase-2-like-isoform-X3-[Salmo-salar]	XP_029304133.1-receptor-interacting-serine/threonine-protein-kinase-4-[Cottoperca-gobio]	XP_030320706.1-ankyrin-repeat-and-protein-kinase-domain-containing-protein-1-[Calypte-anna]	XP_023187212.1-caspase-2-isoform-X3-[Xiphophorus-maculatus]	XP_014966131.1-caspase-8-isoform-X2-[Macaca-mulatta]	XP_043355953.1-caspase-9-isoform-X2-[Dermochelys-coriacea]	XP_039700358.1-caspase-10-isoform-X5-[Pteropus-giganteus]	XP_021070229.1-FAS-associated-death-domain-protein-[Mus-pahari]	XP_011371861.1-TIR-domain-containing-adapter-molecule-1-[Pteropus-vampyrus]	XP_030641182.1-nucleotide-binding-oligomerization-domain-containing-protein-1-[Chanos-chanos] (2)	XP_005318225.1-nucleotide-binding-oligomerization-domain-containing-protein-2-isoform-X1-[Ictidomys-tridecemlineatus]	XP_061076154.1-interferon-regulatory-factor-6-[Conger-conger]
XP_022379113.1-receptor-interacting-serine/threonine-protein-kinase-3-isoform-X2-[Enhydra-lutris-kenyoni]	XP_017800156.2-Z-DNA-binding-protein-1-isoform-X4-[Papio-anubis] (2)	XP_025124185.1-mixed-lineage-kinase-domain-like-protein-[Bubalus-bubalis]	XP_006198726.1-receptor-interacting-serine/threonine-protein-kinase-1-isoform-X6-[Vicugna-pacos]	XP_005444641.3-receptor-interacting-serine/threonine-protein-kinase-2-like-isoform-X1-[Falco-cherrug]	XP_039517185.1-receptor-interacting-serine/threonine-protein-kinase-2-[Pimephales-promelas]	XP_005025779.2-receptor-interacting-serine/threonine-protein-kinase-2-isoform-X3-[Anas-platyrhynchos]	XP_036391912.1-receptor-interacting-serine/threonine-protein-kinase-4-like-[Megalops-cyprinoides]	XP_015505068.1-ankyrin-repeat-and-protein-kinase-domain-containing-protein-1-[Parus-major]	XP_049587635.1-caspase-2-isoform-X1-[Syngnathus-scovelli]	XP_021411142.2-caspase-8-[Lonchura-striata-domestica]	XP_038232694.1-caspase-9-isoform-X1-[Dermochelys-coriacea]	XP_032046247.1-caspase-10-like-isoform-X3-[Aythya-fuligula]	XP_001100468.3-FAS-associated-death-domain-protein-[Macaca-mulatta]	XP_046952394.1-LOW-QUALITY-PROTEIN:-TIR-domain-containing-adapter-molecule-1-[Lynx-rufus]	XP_012694256.1-nucleotide-binding-oligomerization-domain-containing-protein-1-[Clupea-harengus] (2)	XP_026248036.1-nucleotide-binding-oligomerization-domain-containing-protein-2-isoform-X3-[Urocitellus-parryii] (2)	XP_035245478.1-interferon-regulatory-factor-6-[Anguilla-anguilla]
XP_027970691.1-receptor-interacting-serine/threonine-protein-kinase-3-[Eumetopias-jubatus]	XP_050601555.1-Z-DNA-binding-protein-1-isoform-X2-[Macaca-thibetana-thibetana] (2)	XP_014333273.1-PREDICTED:-mixed-lineage-kinase-domain-like-protein-[Bos-mutus]	XP_021444953.2-receptor-interacting-serine/threonine-protein-kinase-1-isoform-X1-[Oncorhynchus-mykiss]	XP_037856240.1-receptor-interacting-serine/threonine-protein-kinase-2-isoform-X1-[Chlorocebus-sabaeus]	XP_040000108.1-receptor-interacting-serine/threonine-protein-kinase-2-like-[Xiphias-gladius]	XP_023856836.1-receptor-interacting-serine/threonine-protein-kinase-2-isoform-X1-[Salvelinus-alpinus]	XP_010792003.1-PREDICTED:-receptor-interacting-serine/threonine-protein-kinase-4-[Notothenia-coriiceps]	XP_021442992.2-ankyrin-repeat-and-protein-kinase-domain-containing-protein-1-[Oncorhynchus-mykiss]	XP_029090307.1-caspase-2-isoform-X2-[Monodon-monoceros]	NP_001387571.1-caspase-8-isoform-8-[Homo-sapiens]	XP_037737238.1-caspase-9-isoform-X2-[Chelonia-mydas]	XP_042562173.1-caspase-8-like-isoform-X2-[Clupea-harengus]	XP_013918461.1-PREDICTED:-FAS-associated-death-domain-protein-isoform-X2-[Thamnophis-sirtalis]	XP_039421980.1-TIR-domain-containing-adapter-molecule-1-[Corvus-cornix-cornix]	XP_048116307.1-nucleotide-binding-oligomerization-domain-containing-protein-1-[Alosa-alosa] (2)	XP_026248035.1-nucleotide-binding-oligomerization-domain-containing-protein-2-isoform-X2-[Urocitellus-parryii] (2)	XP_037106917.1-interferon-regulatory-factor-6-isoform-X2-[Syngnathus-acus]
XP_052047356.1-receptor-interacting-serine/threonine-protein-kinase-3-[Apodemus-sylvaticus]	XP_011721060.1-Z-DNA-binding-protein-1-isoform-X4-[Macaca-nemestrina] (2)	XP_010849037.1-PREDICTED:-mixed-lineage-kinase-domain-like-protein-isoform-X1-[Bison-bison-bison]	XP_025925631.1-receptor-interacting-serine/threonine-protein-kinase-1-isoform-X2-[Apteryx-rowi]	XP_034559581.1-receptor-interacting-serine/threonine-protein-kinase-2-like-isoform-X2-[Notolabrus-celidotus]	XP_051990425.1-receptor-interacting-serine/threonine-protein-kinase-2-like-isoform-X1-[Xyrauchen-texanus]	XP_010175253.1-receptor-interacting-serine/threonine-protein-kinase-2-[Antrostomus-carolinensis]	XP_029556342.1-receptor-interacting-serine/threonine-protein-kinase-4-like-isoform-X2-[Salmo-trutta]	XP_043532490.1-ankyrin-repeat-and-protein-kinase-domain-containing-protein-1-[Chiloscyllium-plagiosum]	XP_057589011.1-caspase-2-isoform-X1-[Hippopotamus-amphibius-kiboko]	XP_041328875.1-caspase-8-like-isoform-X2-[Pyrgilauda-ruficollis]	XP_037737237.1-caspase-9-isoform-X1-[Chelonia-mydas]	XP_038134838.1-uncharacterized-protein-LOC119779311-[Cyprinodon-tularosa]	XP_030278402.1-uncharacterized-protein-LOC115584796-isoform-X1-[Sparus-aurata]	XP_013050713.2-TIR-domain-containing-adapter-molecule-1-[Anser-cygnoides]	XP_041962310.1-nucleotide-binding-oligomerization-domain-containing-protein-1-[Alosa-sapidissima]	XP_026248037.1-nucleotide-binding-oligomerization-domain-containing-protein-2-isoform-X4-[Urocitellus-parryii]	XP_010775856.1-PREDICTED:-interferon-regulatory-factor-6-[Notothenia-coriiceps]
XP_043952903.1-receptor-interacting-serine/threonine-protein-kinase-3-isoform-X1-[Gambusia-affinis]	XP_011721057.1-Z-DNA-binding-protein-1-isoform-X3-[Macaca-nemestrina] (2)	XP_010849040.1-PREDICTED:-mixed-lineage-kinase-domain-like-protein-isoform-X2-[Bison-bison-bison]	XP_050643156.1-receptor-interacting-serine/threonine-protein-kinase-1-isoform-X2-[Macaca-thibetana-thibetana]	XP_025911712.1-receptor-interacting-serine/threonine-protein-kinase-2-like-[Apteryx-rowi]	XP_025917528.1-receptor-interacting-serine/threonine-protein-kinase-2-[Apteryx-rowi]	XP_031686628.1-receptor-interacting-serine/threonine-protein-kinase-2-like-isoform-X1-[Oncorhynchus-kisutch]	XP_052505793.1-receptor-interacting-serine/threonine-protein-kinase-4-isoform-X1-[Budorcas-taxicolor]	XP_048185019.1-ankyrin-repeat-and-protein-kinase-domain-containing-protein-1-[Corvus-hawaiiensis]	XP_038140381.1-caspase-2-isoform-X2-[Cyprinodon-tularosa]	XP_055146188.1-caspase-8-isoform-X1-[Symphalangus-syndactylus]	XP_048681096.1-caspase-9-isoform-X1-[Caretta-caretta]	XP_014640222.1-PREDICTED:-caspase-10-[Ceratotherium-simum-simum]	XP_035581615.1-LOW-QUALITY-PROTEIN:-FAS-associated-death-domain-protein-like-[Zalophus-californianus]	XP_027403126.1-LOW-QUALITY-PROTEIN:-TIR-domain-containing-adapter-molecule-1-[Bos-indicus-x-Bos-taurus]	XP_046733408.1-nucleotide-binding-oligomerization-domain-containing-protein-1-isoform-X1-[Silurus-meridionalis]	XP_026248039.1-nucleotide-binding-oligomerization-domain-containing-protein-2-isoform-X5-[Urocitellus-parryii]	XP_016522922.1-PREDICTED:-interferon-regulatory-factor-6-like-[Poecilia-formosa]
XP_008294702.1-PREDICTED:-receptor-interacting-serine/threonine-protein-kinase-3-like-isoform-X2-[Stegastes-partitus]	XP_011721054.1-Z-DNA-binding-protein-1-isoform-X1-[Macaca-nemestrina] (2)	XP_002694753.1-mixed-lineage-kinase-domain-like-protein-[Bos-taurus]	XP_042321681.1-receptor-interacting-serine/threonine-protein-kinase-1-isoform-X2-[Sceloporus-undulatus]	XP_041848730.1-receptor-interacting-serine/threonine-protein-kinase-2-like-[Melanotaenia-boesemani]	XP_045908052.1-receptor-interacting-serine/threonine-protein-kinase-2-like-isoform-X2-[Micropterus-dolomieu]	XP_027685296.2-receptor-interacting-serine/threonine-protein-kinase-2-isoform-X1-[Chelonia-mydas]	XP_032132710.1-receptor-interacting-serine/threonine-protein-kinase-4-[Sapajus-apella]	XP_032024014.1-LOW-QUALITY-PROTEIN:-ankyrin-repeat-and-protein-kinase-domain-containing-protein-1-[Hylobates-moloch]	XP_039619660.1-caspase-2-isoform-X2-[Polypterus-senegalus]	XP_024613146.1-caspase-8-isoform-X1-[Neophocaena-asiaeorientalis-asiaeorientalis]	XP_048681097.1-caspase-9-isoform-X2-[Caretta-caretta]	XP_045703529.1-caspase-10-[Phyllostomus-hastatus]	XP_041131050.1-protein-FADD-[Polyodon-spathula]	XP_027442601.1-TIR-domain-containing-adapter-molecule-1-[Zalophus-californianus]	XP_046733410.1-nucleotide-binding-oligomerization-domain-containing-protein-1-isoform-X2-[Silurus-meridionalis] (2)	XP_026248034.1-nucleotide-binding-oligomerization-domain-containing-protein-2-isoform-X1-[Urocitellus-parryii]	XP_014859775.1-PREDICTED:-interferon-regulatory-factor-6-like-isoform-X1-[Poecilia-mexicana]
XP_038166058.1-receptor-interacting-serine/threonine-protein-kinase-3-isoform-X1-[Arvicola-amphibius]	XP_005569487.2-PREDICTED:-Z-DNA-binding-protein-1-isoform-X1-[Macaca-fascicularis] (2)	XP_019835758.1-PREDICTED:-mixed-lineage-kinase-domain-like-protein-[Bos-indicus]	XP_040026343.1-receptor-interacting-serine/threonine-protein-kinase-1-[Gasterosteus-aculeatus-aculeatus]	XP_039926381.1-receptor-interacting-serine/threonine-protein-kinase-2-isoform-X3-[Hirundo-rustica]	XP_041268603.1-receptor-interacting-serine/threonine-protein-kinase-2-isoform-X1-[Onychostruthus-taczanowskii]	XP_031978033.1-receptor-interacting-serine/threonine-protein-kinase-2-like-[Corvus-moneduloides]	XP_051766825.1-receptor-interacting-serine/threonine-protein-kinase-4-[Ctenopharyngodon-idella]	XP_022055849.2-ankyrin-repeat-and-protein-kinase-domain-containing-protein-1-[Acanthochromis-polyacanthus]	XP_057224265.1-caspase-2-isoform-X2-[Malurus-melanocephalus]	XP_005858275.1-PREDICTED:-caspase-8-[Myotis-brandtii]	XP_024064141.1-caspase-9-[Terrapene-carolina-triunguis]	XP_027446597.1-caspase-10-isoform-X3-[Zalophus-californianus]	XP_035272335.1-FAS-associated-death-domain-protein-[Anguilla-anguilla]	XP_005812562.1-TIR-domain-containing-adapter-molecule-1-like-[Xiphophorus-maculatus]	XP_060717502.1-nucleotide-binding-oligomerization-domain-containing-protein-1-[Tachysurus-vachellii] (2)	XP_015344235.1-nucleotide-binding-oligomerization-domain-containing-protein-2-isoform-X4-[Marmota-marmota-marmota] (2)	XP_014859777.1-PREDICTED:-interferon-regulatory-factor-6-like-isoform-X2-[Poecilia-mexicana]
XP_036179794.1-LOW-QUALITY-PROTEIN:-receptor-interacting-serine/threonine-protein-kinase-3-like-[Myotis-myotis]	XP_015004209.2-Z-DNA-binding-protein-1-[Macaca-mulatta] (2)	XP_040109476.1-mixed-lineage-kinase-domain-like-protein-[Oryx-dammah]	XP_044223416.1-receptor-interacting-serine/threonine-protein-kinase-1-isoform-X2-[Thunnus-albacares]	XP_038860439.1-receptor-interacting-serine/threonine-protein-kinase-2-like-[Salvelinus-namaycush]	XP_047639601.1-receptor-interacting-serine/threonine-protein-kinase-2-isoform-X2-[Phacochoerus-africanus]	XP_009874624.1-PREDICTED:-receptor-interacting-serine/threonine-protein-kinase-2-like-[Apaloderma-vittatum]	XP_030602334.1-receptor-interacting-serine/threonine-protein-kinase-4-[Archocentrus-centrarchus]	XP_009880756.1-PREDICTED:-ankyrin-repeat-and-protein-kinase-domain-containing-protein-1-[Charadrius-vociferus]	XP_026226345.1-caspase-2-isoform-X4-[Anabas-testudineus]	XP_053452600.1-caspase-8-isoform-X1-[Nycticebus-coucang]	XP_053864837.1-caspase-9-[Malaclemys-terrapin-pileata]	XP_042562174.1-caspase-8-like-isoform-X3-[Clupea-harengus]	XP_054663153.1-death-domain-containing-protein-CRADD-like-isoform-X1-[Grus-americana]	XP_005208987.2-TIR-domain-containing-adapter-molecule-1-isoform-X1-[Bos-taurus]	XP_047664419.1-nucleotide-binding-oligomerization-domain-containing-protein-1-isoform-X2-[Tachysurus-fulvidraco]	XP_048648161.1-nucleotide-binding-oligomerization-domain-containing-protein-2-isoform-X3-[Marmota-marmota-marmota] (2)	XP_014864484.1-PREDICTED:-interferon-regulatory-factor-6-like-isoform-X3-[Poecilia-mexicana]
XP_047203289.1-receptor-interacting-serine/threonine-protein-kinase-3-like-isoform-X3-[Girardinichthys-multiradiatus]	XP_005569487.3-Z-DNA-binding-protein-1-isoform-X2-[Macaca-fascicularis] (2)	XP_027833421.1-mixed-lineage-kinase-domain-like-protein-isoform-X2-[Ovis-aries]	XP_049454365.1-receptor-interacting-serine/threonine-protein-kinase-1-isoform-X2-[Epinephelus-fuscoguttatus]	XP_047582676.1-receptor-interacting-serine/threonine-protein-kinase-2-isoform-X1-[Lutra-lutra]	XP_035402131.1-receptor-interacting-serine/threonine-protein-kinase-2-[Cygnus-atratus]	XP_024295743.1-receptor-interacting-serine/threonine-protein-kinase-2-isoform-X1-[Oncorhynchus-tshawytscha]	XP_032534059.1-LOW-QUALITY-PROTEIN:-receptor-interacting-serine/threonine-protein-kinase-4-[Chiroxiphia-lanceolata]	XP_011782154.1-PREDICTED:-LOW-QUALITY-PROTEIN:-ankyrin-repeat-and-protein-kinase-domain-containing-protein-1-[Colobus-angolensis-palliatus]	XP_036440715.1-caspase-2-isoform-X3-[Colossoma-macropomum]	XP_003253966.1-caspase-8-isoform-X1-[Nomascus-leucogenys]	XP_034609028.1-caspase-9-[Trachemys-scripta-elegans]	XP_032492963.1-caspase-10-isoform-X2-[Phocoena-sinus]	XP_038846806.1-FAS-associated-death-domain-protein-like-[Salvelinus-namaycush]	XP_059399515.1-TIR-domain-containing-adapter-molecule-1-like-[Carassius-carassius]	XP_027015642.1-nucleotide-binding-oligomerization-domain-containing-protein-1-isoform-X1-[Tachysurus-fulvidraco] (2)	XP_015344234.1-nucleotide-binding-oligomerization-domain-containing-protein-2-isoform-X1-[Marmota-marmota-marmota]	XP_007544690.1-PREDICTED:-interferon-regulatory-factor-6-like-isoform-X1-[Poecilia-formosa]
XP_046507937.1-receptor-interacting-serine/threonine-protein-kinase-3-isoform-X1-[Equus-quagga]	XP_011914305.1-PREDICTED:-Z-DNA-binding-protein-1-isoform-X3-[Cercocebus-atys] (2)	XP_042087400.1-mixed-lineage-kinase-domain-like-protein-isoform-X1-[Ovis-aries]	XP_032196863.1-receptor-interacting-serine/threonine-protein-kinase-1-[Mustela-erminea]	XP_031446826.1-receptor-interacting-serine/threonine-protein-kinase-2-[Phasianus-colchicus]	XP_006859294.1-PREDICTED:-receptor-interacting-serine/threonine-protein-kinase-2-like-[Chrysochloris-asiatica]	XP_033896619.2-receptor-interacting-serine/threonine-protein-kinase-2-[Acipenser-ruthenus]	XP_030010404.1-receptor-interacting-serine/threonine-protein-kinase-4-[Sphaeramia-orbicularis]	XP_009871375.1-PREDICTED:-ankyrin-repeat-and-protein-kinase-domain-containing-protein-1-[Apaloderma-vittatum]	XP_012892684.1-PREDICTED:-caspase-2-like,-partial-[Dipodomys-ordii]	XP_039411520.1-caspase-8-like-[Corvus-cornix-cornix]	XP_005293057.1-LOW-QUALITY-PROTEIN:-caspase-9-[Chrysemys-picta-bellii]	XP_017278102.1-caspase-8-isoform-X2-[Kryptolebias-marmoratus]	XP_036959441.1-uncharacterized-protein-zgc:174906-isoform-X2-[Acanthopagrus-latus]	XP_055514769.1-TIR-domain-containing-adapter-molecule-1-[Leucoraja-erinacea]	XP_053346671.1-nucleotide-binding-oligomerization-domain-containing-protein-1-isoform-X1-[Clarias-gariepinus] (2)	XP_015344237.1-nucleotide-binding-oligomerization-domain-containing-protein-2-isoform-X2-[Marmota-marmota-marmota] (2)	XP_014864483.1-PREDICTED:-interferon-regulatory-factor-6-like-isoform-X2-[Poecilia-mexicana]
XP_039894230.1-receptor-interacting-serine/threonine-protein-kinase-3-[Simochromis-diagramma]	XP_011914298.1-PREDICTED:-Z-DNA-binding-protein-1-isoform-X2-[Cercocebus-atys] (2)	XP_052512485.1-mixed-lineage-kinase-domain-like-protein-[Budorcas-taxicolor]	XP_041103953.1-receptor-interacting-serine/threonine-protein-kinase-1-isoform-X3-[Polyodon-spathula]	XP_035275947.1-receptor-interacting-serine/threonine-protein-kinase-2-isoform-X1-[Anguilla-anguilla]	XP_042700424.1-LOW-QUALITY-PROTEIN:-receptor-interacting-serine/threonine-protein-kinase-2-[Chrysemys-picta-bellii]	XP_052653085.1-receptor-interacting-serine/threonine-protein-kinase-2-like-isoform-X2-[Harpia-harpyja]	XP_002941332.1-receptor-interacting-serine/threonine-protein-kinase-4-[Xenopus-tropicalis]	XP_009935666.1-PREDICTED:-ankyrin-repeat-and-protein-kinase-domain-containing-protein-1-[Opisthocomus-hoazin]	XP_044064933.1-caspase-2-isoform-X4-[Siniperca-chuatsi]	XP_006935535.1-caspase-8-[Felis-catus]	XP_032635455.1-caspase-9-isoform-X1-[Chelonoidis-abingdonii]	XP_048124297.1-caspase-8-[Alosa-alosa]	XP_025307559.1-FAS-associated-death-domain-protein-isoform-X2-[Canis-lupus-dingo]	XP_004865772.1-TIR-domain-containing-adapter-molecule-1-[Heterocephalus-glaber]	NP_001186996.1-nucleotide-binding-oligomerization-domain-containing-protein-1-[Ictalurus-punctatus]	XP_027794841.1-nucleotide-binding-oligomerization-domain-containing-protein-2-isoform-X2-[Marmota-flaviventris] (2)	XP_014892256.1-PREDICTED:-interferon-regulatory-factor-6-like-[Poecilia-latipinna]
XP_028993690.1-receptor-interacting-serine/threonine-protein-kinase-3-isoform-X1-[Betta-splendens]	XP_011914297.1-PREDICTED:-Z-DNA-binding-protein-1-isoform-X1-[Cercocebus-atys] (2)	XP_013826426.1-PREDICTED:-mixed-lineage-kinase-domain-like-protein-isoform-X2-[Capra-hircus]	XP_033848872.2-receptor-interacting-serine/threonine-protein-kinase-1-isoform-X2-[Acipenser-ruthenus]	XP_037537549.1-receptor-interacting-serine/threonine-protein-kinase-2-[Nematolebias-whitei]	XP_015210005.1-PREDICTED:-receptor-interacting-serine/threonine-protein-kinase-2-[Lepisosteus-oculatus]	XP_035192450.1-receptor-interacting-serine/threonine-protein-kinase-2-like-isoform-X1-[Oxyura-jamaicensis]	XP_041591205.1-receptor-interacting-serine/threonine-protein-kinase-4-[Vulpes-lagopus]	XP_051668153.1-ankyrin-repeat-and-protein-kinase-domain-containing-protein-1-[Manacus-candei]	XP_031643088.1-caspase-2-like-[Oncorhynchus-kisutch]	XP_005049226.1-PREDICTED:-caspase-8-like-[Ficedula-albicollis]	XP_032635456.1-caspase-9-isoform-X2-[Chelonoidis-abingdonii]	XP_020826504.1-caspase-10-isoform-X3-[Phascolarctos-cinereus]	XP_037306385.1-FAS-associated-death-domain-protein-like,-partial-[Pungitius-pungitius]	XP_050790145.1-TIR-domain-containing-adapter-molecule-1-[Gopherus-flavomarginatus]	XP_026767927.1-nucleotide-binding-oligomerization-domain-containing-protein-1-[Pangasianodon-hypophthalmus] (2)	XP_027794839.1-nucleotide-binding-oligomerization-domain-containing-protein-2-isoform-X1-[Marmota-flaviventris] (2)	XP_043979159.1-interferon-regulatory-factor-6-[Gambusia-affinis]
XP_049929915.1-receptor-interacting-serine/threonine-protein-kinase-3-like-isoform-X2-[Epinephelus-moara]	XP_003904618.2-Z-DNA-binding-protein-1-isoform-X3-[Papio-anubis] (2)	XP_017917192.1-PREDICTED:-mixed-lineage-kinase-domain-like-protein-isoform-X1-[Capra-hircus]	XP_031666295.1-receptor-interacting-serine/threonine-protein-kinase-1-like-[Oncorhynchus-kisutch]	XP_051641062.1-receptor-interacting-serine/threonine-protein-kinase-2-isoform-X2-[Manacus-candei]	XP_049556207.1-receptor-interacting-serine/threonine-protein-kinase-2-isoform-X2-[Orcinus-orca]	XP_044290140.1-receptor-interacting-serine/threonine-protein-kinase-2-like-[Varanus-komodoensis]	XP_026355674.1-receptor-interacting-serine/threonine-protein-kinase-4-[Ursus-arctos]	XP_048369021.1-ankyrin-repeat-and-protein-kinase-domain-containing-protein-1-[Sphaerodactylus-townsendi]	XP_043972870.1-caspase-2-isoform-X4-[Gambusia-affinis]	XP_036242828.1-caspase-8-isoform-X1-[Molothrus-ater]	XP_050787805.1-caspase-9-isoform-X2-[Gopherus-flavomarginatus]	XP_038605241.1-caspase-10-isoform-X2-[Tachyglossus-aculeatus]	XP_053174861.1-protein-FADD-[Scomber-japonicus]	XP_025961666.1-TIR-domain-containing-adapter-molecule-1-[Dromaius-novaehollandiae]	XP_060756539.1-nucleotide-binding-oligomerization-domain-containing-protein-1-isoform-X3-[Neoarius-graeffei] (2)	XP_027794843.1-nucleotide-binding-oligomerization-domain-containing-protein-2-isoform-X4-[Marmota-flaviventris] (2)	XP_005814583.1-interferon-regulatory-factor-6-[Xiphophorus-maculatus]
XP_020671558.1-receptor-interacting-serine/threonine-protein-kinase-3-isoform-X1-[Pogona-vitticeps]	XP_025255549.1-Z-DNA-binding-protein-1-isoform-X1-[Theropithecus-gelada] (2)	XP_049643396.1-mixed-lineage-kinase-domain-like-protein-[Suncus-etruscus]	XP_037374461.1-receptor-interacting-serine/threonine-protein-kinase-1-[Talpa-occidentalis]	XP_028592407.1-receptor-interacting-serine/threonine-protein-kinase-2-[Podarcis-muralis]	XP_033960131.1-receptor-interacting-serine/threonine-protein-kinase-2-[Pseudochaenichthys-georgianus]	XP_038223791.1-receptor-interacting-serine/threonine-protein-kinase-2-like-[Dermochelys-coriacea]	XP_033490286.1-receptor-interacting-serine/threonine-protein-kinase-4-[Epinephelus-lanceolatus]	XP_046245706.1-ankyrin-repeat-and-protein-kinase-domain-containing-protein-1-[Scatophagus-argus]	XP_003791595.2-caspase-2-[Otolemur-garnettii]	XP_021155179.1-caspase-8-[Columba-livia]	XP_030393398.1-caspase-9-isoform-X2-[Gopherus-evgoodei]	XP_015723628.1-caspase-10-isoform-X2-[Coturnix-japonica]	XP_057203782.1-protein-FADD-[Triplophysa-rosa]	XP_030148660.1-TIR-domain-containing-adapter-molecule-1-[Lynx-canadensis]	XP_060756538.1-nucleotide-binding-oligomerization-domain-containing-protein-1-isoform-X2-[Neoarius-graeffei]	XP_046290614.1-nucleotide-binding-oligomerization-domain-containing-protein-2-isoform-X6-[Marmota-monax]	XP_054883418.1-interferon-regulatory-factor-6-[Poeciliopsis-prolifica]
XP_036055735.1-receptor-interacting-serine/threonine-protein-kinase-3-[Onychomys-torridus]	XP_025255550.1-Z-DNA-binding-protein-1-isoform-X2-[Theropithecus-gelada] (2)	XP_055002171.1-mixed-lineage-kinase-domain-like-protein-[Sorex-araneus]	XP_006085764.1-receptor-interacting-serine/threonine-protein-kinase-1-[Myotis-lucifugus]	XP_052333196.1-LOW-QUALITY-PROTEIN:-receptor-interacting-serine/threonine-protein-kinase-2-like-[Oncorhynchus-keta]	XP_041046439.1-receptor-interacting-serine/threonine-protein-kinase-2-isoform-X2-[Carcharodon-carcharias]	XP_015680052.1-receptor-interacting-serine/threonine-protein-kinase-2-[Protobothrops-mucrosquamatus]	XP_034082755.1-LOW-QUALITY-PROTEIN:-receptor-interacting-serine/threonine-protein-kinase-4-[Gymnodraco-acuticeps]	XP_027658865.1-ankyrin-repeat-and-protein-kinase-domain-containing-protein-1-[Falco-cherrug]	XP_050640905.1-caspase-2-isoform-X3-[Macaca-thibetana-thibetana]	XP_025905598.1-caspase-8-like-[Nothoprocta-perdicaria]	XP_050787804.1-caspase-9-isoform-X1-[Gopherus-flavomarginatus]	XP_052414602.1-caspase-8-[Carassius-gibelio]	XP_044160905.1-caspase-8-like-[Bufo-gargarizans]	XP_038171533.1-TIR-domain-containing-adapter-molecule-1-[Arvicola-amphibius]	XP_060756537.1-nucleotide-binding-oligomerization-domain-containing-protein-1-isoform-X1-[Neoarius-graeffei] (2)	XP_046290609.1-nucleotide-binding-oligomerization-domain-containing-protein-2-isoform-X4-[Marmota-monax] (2)	XP_014892433.1-PREDICTED:-interferon-regulatory-factor-6-like-isoform-X5-[Poecilia-latipinna]
XP_030043379.1-receptor-interacting-serine/threonine-protein-kinase-3-like-isoform-X1-[Microcaecilia-unicolor]	XP_011792071.1-PREDICTED:-Z-DNA-binding-protein-1-isoform-X3-[Colobus-angolensis-palliatus] (2)	XP_055992720.1-mixed-lineage-kinase-domain-like-protein-[Sorex-cinereus]	XP_051263332.1-receptor-interacting-serine/threonine-protein-kinase-1-[Dicentrarchus-labrax]	XP_041946394.1-receptor-interacting-serine/threonine-protein-kinase-2-[Alosa-sapidissima]	XP_023698201.1-LOW-QUALITY-PROTEIN:-receptor-interacting-serine/threonine-protein-kinase-2-like-[Paramormyrops-kingsleyae]	XP_030437882.1-receptor-interacting-serine/threonine-protein-kinase-2-like-isoform-X1-[Gopherus-evgoodei]	XP_044141685.1-receptor-interacting-serine/threonine-protein-kinase-4-like-[Bufo-gargarizans]	XP_028822998.1-ankyrin-repeat-and-protein-kinase-domain-containing-protein-1-isoform-X3-[Denticeps-clupeoides]	XP_003983182.2-caspase-2-isoform-X1-[Felis-catus]	XP_057601703.1-caspase-8-isoform-X1-[Hippopotamus-amphibius-kiboko]	XP_030393397.1-caspase-9-isoform-X1-[Gopherus-evgoodei]	XP_026989253.2-caspase-8-isoform-X1-[Tachysurus-fulvidraco]	XP_045433632.1-FAS-associated-death-domain-protein-[Pipistrellus-kuhlii]	XP_056276821.1-TIR-domain-containing-adapter-molecule-1-[Pseudoliparis-swirei]	XP_026856955.2-nucleotide-binding-oligomerization-domain-containing-protein-1-[Electrophorus-electricus]	XP_046290608.1-nucleotide-binding-oligomerization-domain-containing-protein-2-isoform-X3-[Marmota-monax]	XP_014892416.1-PREDICTED:-interferon-regulatory-factor-6-like-isoform-X3-[Poecilia-latipinna]
XP_003924317.1-receptor-interacting-serine/threonine-protein-kinase-3-[Saimiri-boliviensis-boliviensis]	XP_011792069.1-PREDICTED:-Z-DNA-binding-protein-1-isoform-X1-[Colobus-angolensis-palliatus] (2)	XP_013359316.1-PREDICTED:-mixed-lineage-kinase-domain-like-protein-[Chinchilla-lanigera]	XP_036234500.1-receptor-interacting-serine/threonine-protein-kinase-1-isoform-X1-[Molothrus-ater]	XP_044843695.1-receptor-interacting-serine/threonine-protein-kinase-2-like-isoform-X2-[Mauremys-mutica]	XP_029779596.1-receptor-interacting-serine/threonine-protein-kinase-2-[Suricata-suricatta]	XP_036820222.1-receptor-interacting-serine/threonine-protein-kinase-2-isoform-X1-[Oncorhynchus-mykiss]	XP_038270687.1-receptor-interacting-serine/threonine-protein-kinase-4-isoform-X1-[Dermochelys-coriacea]	XP_050012165.1-LOW-QUALITY-PROTEIN:-ankyrin-repeat-and-protein-kinase-domain-containing-protein-1-[Microtus-fortis]	XP_053826666.1-caspase-2-isoform-X2-[Vidua-macroura]	XP_032920526.1-caspase-8-like-[Catharus-ustulatus]	XP_039364799.1-caspase-9-[Mauremys-reevesii]	XP_014810034.1-PREDICTED:-caspase-10-like-[Calidris-pugnax]	XP_006804232.1-protein-FADD-[Neolamprologus-brichardi]	XP_038633582.1-TIR-domain-containing-adapter-molecule-1-[Scyliorhinus-canicula]	XP_022518151.2-nucleotide-binding-oligomerization-domain-containing-protein-1-[Astyanax-mexicanus]	XP_046290605.1-nucleotide-binding-oligomerization-domain-containing-protein-2-isoform-X1-[Marmota-monax] (2)	XP_014892411.1-PREDICTED:-interferon-regulatory-factor-6-like-isoform-X2-[Poecilia-latipinna]
XP_024279415.1-receptor-interacting-serine/threonine-protein-kinase-3-like-isoform-X1-[Oncorhynchus-tshawytscha]	XP_011792070.1-PREDICTED:-Z-DNA-binding-protein-1-isoform-X2-[Colobus-angolensis-palliatus] (2)	XP_012868142.1-PREDICTED:-mixed-lineage-kinase-domain-like-protein-[Dipodomys-ordii]	XP_051711860.1-receptor-interacting-serine/threonine-protein-kinase-1-isoform-X1-[Oryctolagus-cuniculus]	XP_034867377.1-receptor-interacting-serine/threonine-protein-kinase-2-[Mirounga-leonina]	XP_023270581.1-receptor-interacting-serine/threonine-protein-kinase-2-isoform-X1-[Seriola-lalandi-dorsalis]	XP_029497196.1-receptor-interacting-serine/threonine-protein-kinase-2-like-isoform-X1-[Oncorhynchus-nerka]	XP_048146549.1-receptor-interacting-serine/threonine-protein-kinase-4-[Corvus-hawaiiensis]	XP_009989264.1-PREDICTED:-ankyrin-repeat-and-protein-kinase-domain-containing-protein-1-[Tauraco-erythrolophus]	XP_024613802.1-caspase-2-isoform-X3-[Neophocaena-asiaeorientalis-asiaeorientalis]	XP_023074598.1-caspase-8-isoform-X3-[Piliocolobus-tephrosceles]	XP_044852457.1-caspase-9-isoform-X1-[Mauremys-mutica]	XP_054441814.1-caspase-10-[Pteronotus-parnellii-mesoamericanus]	XP_055171014.1-FAS-associated-death-domain-protein-[Nyctereutes-procyonoides]	XP_028618280.1-TIR-domain-containing-adapter-molecule-1-[Grammomys-surdaster]	XP_017559402.1-nucleotide-binding-oligomerization-domain-containing-protein-1-[Pygocentrus-nattereri] (2)	XP_046290606.1-nucleotide-binding-oligomerization-domain-containing-protein-2-isoform-X2-[Marmota-monax] (2)	XP_014892424.1-PREDICTED:-interferon-regulatory-factor-6-like-isoform-X4-[Poecilia-latipinna]
XP_037308486.1-receptor-interacting-serine/threonine-protein-kinase-3-like-isoform-X2-[Pungitius-pungitius]	XP_025255551.1-Z-DNA-binding-protein-1-isoform-X3-[Theropithecus-gelada] (2)	XP_042556893.1-mixed-lineage-kinase-domain-like-protein-isoform-X3-[Dipodomys-spectabilis]	XP_027876934.1-receptor-interacting-serine/threonine-protein-kinase-1-[Xiphophorus-couchianus]	XP_047934597.1-receptor-interacting-serine/threonine-protein-kinase-2-like-isoform-X2-[Anser-cygnoides]	XP_025250831.1-receptor-interacting-serine/threonine-protein-kinase-2-[Theropithecus-gelada]	XP_041315007.1-receptor-interacting-serine/threonine-protein-kinase-2-like-[Pyrgilauda-ruficollis]	XP_040441064.1-receptor-interacting-serine/threonine-protein-kinase-4-[Falco-naumanni]	XP_044059170.1-LOW-QUALITY-PROTEIN:-ankyrin-repeat-and-protein-kinase-domain-containing-protein-1-[Siniperca-chuatsi]	XP_032374605.1-caspase-2-isoform-X8-[Etheostoma-spectabile]	XP_016805776.1-caspase-8-isoform-X3-[Pan-troglodytes]	XP_044308303.1-caspase-9-isoform-X1-[Varanus-komodoensis]	XP_017326246.1-caspase-8-isoform-X1-[Ictalurus-punctatus]	XP_040002618.1-protein-FADD-[Xiphias-gladius]	XP_044854809.1-TIR-domain-containing-adapter-molecule-1-[Mauremys-mutica]	XP_036413994.1-nucleotide-binding-oligomerization-domain-containing-protein-1-[Colossoma-macropomum]	XP_029780022.1-nucleotide-binding-oligomerization-domain-containing-protein-2-isoform-X3-[Suricata-suricatta] (2)	XP_014892445.1-PREDICTED:-interferon-regulatory-factor-6-like-isoform-X6-[Poecilia-latipinna]
XP_034541434.1-receptor-interacting-serine/threonine-protein-kinase-3-like-[Notolabrus-celidotus]	XP_050601558.1-Z-DNA-binding-protein-1-isoform-X5-[Macaca-thibetana-thibetana] (2)	XP_042556891.1-mixed-lineage-kinase-domain-like-protein-isoform-X1-[Dipodomys-spectabilis]	XP_041848664.1-receptor-interacting-serine/threonine-protein-kinase-1-isoform-X2-[Melanotaenia-boesemani]	XP_034760548.1-receptor-interacting-serine/threonine-protein-kinase-2-like-[Acipenser-ruthenus]	XP_026168629.1-receptor-interacting-serine/threonine-protein-kinase-2-isoform-X1-[Mastacembelus-armatus]	XP_005526489.2-PREDICTED:-receptor-interacting-serine/threonine-protein-kinase-2-like-[Pseudopodoces-humilis]	XP_049730873.1-receptor-interacting-serine/threonine-protein-kinase-4-[Elephas-maximus-indicus]	XP_006072559.3-LOW-QUALITY-PROTEIN:-ankyrin-repeat-and-protein-kinase-domain-containing-protein-1-[Bubalus-bubalis]	XP_009872031.1-PREDICTED:-caspase-2-like-[Apaloderma-vittatum]	XP_050772779.1-caspase-8-like-isoform-X3-[Gopherus-flavomarginatus]	XP_044308304.1-caspase-9-isoform-X2-[Varanus-komodoensis]	XP_014853072.1-PREDICTED:-caspase-8-like-[Poecilia-mexicana]	XP_034869376.1-FAS-associated-death-domain-protein-[Mirounga-leonina]	XP_028296624.1-TIR-domain-containing-adapter-molecule-1-like-[Gouania-willdenowi]	XP_048881994.1-nucleotide-binding-oligomerization-domain-containing-protein-1-isoform-X1-[Brienomyrus-brachyistius]	XP_029780021.1-nucleotide-binding-oligomerization-domain-containing-protein-2-isoform-X2-[Suricata-suricatta]	XP_014892405.1-PREDICTED:-interferon-regulatory-factor-6-like-isoform-X1-[Poecilia-latipinna]
XP_023209183.1-receptor-interacting-serine/threonine-protein-kinase-3-like-isoform-X1-[Xiphophorus-maculatus]	XP_011721061.1-Z-DNA-binding-protein-1-isoform-X5-[Macaca-nemestrina] (2)	XP_042556895.1-mixed-lineage-kinase-domain-like-protein-isoform-X4-[Dipodomys-spectabilis]	XP_049889170.1-receptor-interacting-serine/threonine-protein-kinase-1-isoform-X1-[Epinephelus-moara]	XP_043889377.1-receptor-interacting-serine/threonine-protein-kinase-2-like-[Solea-senegalensis]	XP_033507424.1-receptor-interacting-serine/threonine-protein-kinase-2-like-isoform-X2-[Epinephelus-lanceolatus]	XP_048172975.1-receptor-interacting-serine/threonine-protein-kinase-2-like-[Corvus-hawaiiensis]	XP_010198291.1-PREDICTED:-receptor-interacting-serine/threonine-protein-kinase-4,-partial-[Colius-striatus]	XP_039941127.1-ankyrin-repeat-and-protein-kinase-domain-containing-protein-1-[Hirundo-rustica]	XP_008152175.2-caspase-2-isoform-X1-[Eptesicus-fuscus]	XP_008068978.1-caspase-8-[Carlito-syrichta]	XP_053136892.1-caspase-9-[Hemicordylus-capensis]	XP_026152124.1-caspase-10-isoform-X1-[Mastacembelus-armatus]	XP_013815052.1-PREDICTED:-FAS-associated-death-domain-protein-[Apteryx-mantelli-mantelli]	XP_057714264.1-TIR-domain-containing-adapter-molecule-1-[Corythoichthys-intestinalis]	XP_023676993.1-nucleotide-binding-oligomerization-domain-containing-protein-1-[Paramormyrops-kingsleyae]	XP_029780024.1-nucleotide-binding-oligomerization-domain-containing-protein-2-isoform-X5-[Suricata-suricatta]	XP_014892454.1-PREDICTED:-interferon-regulatory-factor-6-like-isoform-X7-[Poecilia-latipinna]
XP_041795545.1-ankyrin-repeat-and-protein-kinase-domain-containing-protein-1-like-isoform-X1-[Chelmon-rostratus]	XP_017707652.1-PREDICTED:-Z-DNA-binding-protein-1-isoform-X3-[Rhinopithecus-bieti] (2)	XP_042556892.1-mixed-lineage-kinase-domain-like-protein-isoform-X2-[Dipodomys-spectabilis]	XP_046309404.1-receptor-interacting-serine/threonine-protein-kinase-1-isoform-X1-[Marmota-monax]	XP_043833801.1-receptor-interacting-serine/threonine-protein-kinase-2-isoform-X1-[Dromiciops-gliroides]	XP_047409245.1-receptor-interacting-serine/threonine-protein-kinase-2-[Sciurus-carolinensis]	XP_026544120.1-receptor-interacting-serine/threonine-protein-kinase-2-like-[Notechis-scutatus]	XP_044526250.1-receptor-interacting-serine/threonine-protein-kinase-4-[Gracilinanus-agilis]	XP_032213894.1-LOW-QUALITY-PROTEIN:-ankyrin-repeat-and-protein-kinase-domain-containing-protein-1-[Mustela-erminea]	XP_028567301.1-caspase-2-isoform-X1-[Podarcis-muralis]	XP_021253377.1-caspase-8-like-[Numida-meleagris]	XP_015283422.1-PREDICTED:-caspase-9-[Gekko-japonicus]	XP_026709026.1-caspase-10-like-isoform-X2-[Athene-cunicularia]	XP_035748520.1-FAS-associated-death-domain-protein-isoform-X3-[Egretta-garzetta]	XP_051979734.1-TIR-domain-containing-adapter-molecule-1-like-[Xyrauchen-texanus]	XP_018610335.1-nucleotide-binding-oligomerization-domain-containing-protein-1-isoform-X1-[Scleropages-formosus]	XP_029780026.1-nucleotide-binding-oligomerization-domain-containing-protein-2-isoform-X7-[Suricata-suricatta]	XP_007544386.1-PREDICTED:-interferon-regulatory-factor-6-like-[Poecilia-formosa]
XP_003440615.2-receptor-interacting-serine/threonine-protein-kinase-3-isoform-X5-[Oreochromis-niloticus]	XP_010363424.2-Z-DNA-binding-protein-1-isoform-X7-[Rhinopithecus-roxellana] (2)	XP_023369861.1-mixed-lineage-kinase-domain-like-protein-[Otolemur-garnettii]	XP_048406207.1-receptor-interacting-serine/threonine-protein-kinase-1-[Stegostoma-fasciatum]	XP_008687398.2-receptor-interacting-serine/threonine-protein-kinase-2-isoform-X1-[Ursus-maritimus]	XP_033059552.1-receptor-interacting-serine/threonine-protein-kinase-2-isoform-X1-[Trachypithecus-francoisi]	XP_032051844.1-receptor-interacting-serine/threonine-protein-kinase-2-like-isoform-X1-[Aythya-fuligula]	XP_039533457.1-receptor-interacting-serine/threonine-protein-kinase-4-[Pimephales-promelas]	XP_005240161.1-ankyrin-repeat-and-protein-kinase-domain-containing-protein-1-[Falco-peregrinus]	XP_008695524.1-caspase-2-isoform-X3-[Ursus-maritimus]	XP_027534052.1-caspase-8-like-[Neopelma-chrysocephalum]	XP_056721332.1-caspase-9-[Euleptes-europaea]	XP_053803496.1-caspase-10-like-[Vidua-chalybeata]	XP_055776675.1-protein-FADD-[Salvelinus-fontinalis]	XP_061278558.1-TIR-domain-containing-adapter-molecule-1-[Bos-javanicus]	XP_036395706.1-nucleotide-binding-oligomerization-domain-containing-protein-1-isoform-X2-[Megalops-cyprinoides]	XP_029780019.1-nucleotide-binding-oligomerization-domain-containing-protein-2-isoform-X1-[Suricata-suricatta]	XP_029908365.1-interferon-regulatory-factor-6-[Myripristis-murdjan]
XP_028441748.1-receptor-interacting-serine/threonine-protein-kinase-3-like-[Perca-flavescens]	XP_017707651.1-PREDICTED:-Z-DNA-binding-protein-1-isoform-X2-[Rhinopithecus-bieti] (2)	XP_053463708.1-mixed-lineage-kinase-domain-like-protein-isoform-X1-[Nycticebus-coucang]	XP_014929060.1-receptor-interacting-serine/threonine-protein-kinase-1-[Acinonyx-jubatus]	XP_028834137.1-receptor-interacting-serine/threonine-protein-kinase-2-[Denticeps-clupeoides]	XP_035026265.1-receptor-interacting-serine/threonine-protein-kinase-2-isoform-X1-[Hippoglossus-stenolepis]	XP_032086506.1-receptor-interacting-serine/threonine-protein-kinase-2-like-[Thamnophis-elegans]	XP_020320750.1-receptor-interacting-serine/threonine-protein-kinase-4-[Oncorhynchus-kisutch]	XP_019743280.1-PREDICTED:-ankyrin-repeat-and-protein-kinase-domain-containing-protein-1-[Hippocampus-comes]	XP_042345295.1-caspase-2-isoform-X9-[Plectropomus-leopardus]	XP_018877648.1-caspase-8-isoform-X1-[Gorilla-gorilla-gorilla]	XP_048374759.1-caspase-9-isoform-X1-[Sphaerodactylus-townsendi]	XP_044888880.1-caspase-10-like-isoform-X1-[Mauremys-mutica]	XP_034500950.1-FAS-associated-death-domain-protein-isoform-X2-[Ailuropoda-melanoleuca]	XP_052602838.1-TIR-domain-containing-adapter-molecule-1-[Peromyscus-californicus-insignis]	XP_036395704.1-nucleotide-binding-oligomerization-domain-containing-protein-1-isoform-X1-[Megalops-cyprinoides]	XP_029780027.1-nucleotide-binding-oligomerization-domain-containing-protein-2-isoform-X8-[Suricata-suricatta]	XP_056154297.1-interferon-regulatory-factor-6-[Lampris-incognitus]
XP_038166066.1-receptor-interacting-serine/threonine-protein-kinase-3-isoform-X3-[Arvicola-amphibius]	XP_010363422.2-Z-DNA-binding-protein-1-isoform-X6-[Rhinopithecus-roxellana] (2)	XP_006878923.1-PREDICTED:-mixed-lineage-kinase-domain-like-protein-[Elephantulus-edwardii]	XP_017352959.1-receptor-interacting-serine/threonine-protein-kinase-1-isoform-X1-[Cebus-imitator]	XP_032602904.2-receptor-interacting-serine/threonine-protein-kinase-2-isoform-X2-[Taeniopygia-guttata]	XP_014726238.1-PREDICTED:-receptor-interacting-serine/threonine-protein-kinase-2-isoform-X1-[Sturnus-vulgaris]	XP_040471021.1-receptor-interacting-serine/threonine-protein-kinase-2-like-isoform-X1-[Falco-naumanni]	XP_005375905.1-PREDICTED:-receptor-interacting-serine/threonine-protein-kinase-4-isoform-X1-[Chinchilla-lanigera]	XP_027786567.1-LOW-QUALITY-PROTEIN:-ankyrin-repeat-and-protein-kinase-domain-containing-protein-1-[Marmota-flaviventris]	XP_010338716.1-caspase-2-isoform-X2-[Saimiri-boliviensis-boliviensis]	XP_008972427.1-caspase-8-isoform-X3-[Pan-paniscus]	XP_054857996.1-caspase-9-isoform-X2-[Eublepharis-macularius]	XP_010887106.2-caspase-8-isoform-X1-[Esox-lucius]	XP_049451491.1-protein-FADD-[Epinephelus-fuscoguttatus]	XP_058513681.1-TIR-domain-containing-adapter-molecule-1-[Ochotona-princeps]	XP_035271529.1-nucleotide-binding-oligomerization-domain-containing-protein-1-isoform-X1-[Anguilla-anguilla]	XP_029780023.1-nucleotide-binding-oligomerization-domain-containing-protein-2-isoform-X4-[Suricata-suricatta] (2)	XP_015815328.1-interferon-regulatory-factor-6-[Nothobranchius-furzeri]
XP_043411862.1-receptor-interacting-serine/threonine-protein-kinase-3-isoform-X2-[Prionailurus-bengalensis]	XP_033042732.1-Z-DNA-binding-protein-1-isoform-X7-[Trachypithecus-francoisi] (2)	XP_058135701.1-mixed-lineage-kinase-domain-like-protein-[Dasypus-novemcinctus]	XP_035408605.1-LOW-QUALITY-PROTEIN:-receptor-interacting-serine/threonine-protein-kinase-1-[Cygnus-atratus]	XP_041078217.1-receptor-interacting-serine/threonine-protein-kinase-2-[Polyodon-spathula]	XP_007084404.2-receptor-interacting-serine/threonine-protein-kinase-2-[Panthera-tigris]	XP_029577786.1-receptor-interacting-serine/threonine-protein-kinase-2-like-isoform-X3-[Salmo-trutta]	XP_046504222.1-receptor-interacting-serine/threonine-protein-kinase-4-[Equus-quagga]	XP_045692572.1-ankyrin-repeat-and-protein-kinase-domain-containing-protein-1-isoform-X3-[Phyllostomus-hastatus]	XP_052029525.1-caspase-2-isoform-X1-[Apodemus-sylvaticus]	XP_041329316.1-caspase-8-like-[Pyrgilauda-ruficollis]	XP_054857997.1-caspase-9-isoform-X3-[Eublepharis-macularius]	XP_049743767.1-caspase-10-isoform-X2-[Elephas-maximus-indicus]	XP_033783748.1-FAS-associated-death-domain-protein-[Geotrypetes-seraphini]	XP_029970829.1-LOW-QUALITY-PROTEIN:-TIR-domain-containing-adapter-molecule-1-like-[Salarias-fasciatus]	XP_061106005.1-nucleotide-binding-oligomerization-domain-containing-protein-1-isoform-X1-[Conger-conger]	XP_049720378.1-nucleotide-binding-oligomerization-domain-containing-protein-2-isoform-X1-[Elephas-maximus-indicus]	XP_037535462.1-interferon-regulatory-factor-6-[Nematolebias-whitei]
XP_006172897.2-receptor-interacting-serine/threonine-protein-kinase-3-isoform-X1-[Camelus-ferus]	XP_033042731.1-Z-DNA-binding-protein-1-isoform-X6-[Trachypithecus-francoisi] (2)	XP_037672089.1-mixed-lineage-kinase-domain-like-protein-isoform-X2-[Choloepus-didactylus]	XP_050795928.1-receptor-interacting-serine/threonine-protein-kinase-1-isoform-X2-[Gopherus-flavomarginatus]	XP_010137906.1-PREDICTED:-receptor-interacting-serine/threonine-protein-kinase-2-like-[Buceros-rhinoceros-silvestris]	XP_040117053.1-receptor-interacting-serine/threonine-protein-kinase-2-isoform-X2-[Oryx-dammah]	XP_039619132.1-receptor-interacting-serine/threonine-protein-kinase-2-[Polypterus-senegalus]	XP_004631848.1-receptor-interacting-serine/threonine-protein-kinase-4-isoform-X1-[Octodon-degus]	XP_031152885.1-ankyrin-repeat-and-protein-kinase-domain-containing-protein-1-[Sander-lucioperca]	XP_034030449.1-caspase-2-isoform-X1-[Thalassophryne-amazonica]	XP_037379726.1-caspase-8-isoform-X1-[Talpa-occidentalis]	XP_054857995.1-caspase-9-isoform-X1-[Eublepharis-macularius]	XP_041259241.1-caspase-10-isoform-X1-[Onychostruthus-taczanowskii]	XP_017731376.1-PREDICTED:-caspase-10-isoform-X2-[Rhinopithecus-bieti]	XP_027982158.1-TIR-domain-containing-adapter-molecule-1-[Eumetopias-jubatus]	XP_061106014.1-nucleotide-binding-oligomerization-domain-containing-protein-1-isoform-X2-[Conger-conger]	XP_023411375.1-nucleotide-binding-oligomerization-domain-containing-protein-2-isoform-X3-[Loxodonta-africana]	XP_017271171.1-interferon-regulatory-factor-6-[Kryptolebias-marmoratus]
XP_006789510.1-ankyrin-repeat-and-protein-kinase-domain-containing-protein-1-like-isoform-X4-[Neolamprologus-brichardi]	XP_033042728.1-Z-DNA-binding-protein-1-isoform-X4-[Trachypithecus-francoisi] (2)	XP_037672090.1-mixed-lineage-kinase-domain-like-protein-isoform-X3-[Choloepus-didactylus]	XP_035566390.1-receptor-interacting-serine/threonine-protein-kinase-1-[Canis-lupus-dingo]	XP_019958357.1-PREDICTED:-receptor-interacting-serine/threonine-protein-kinase-2-isoform-X3-[Paralichthys-olivaceus]	XP_004474800.1-receptor-interacting-serine/threonine-protein-kinase-2-isoform-X1-[Dasypus-novemcinctus]	XP_052653083.1-receptor-interacting-serine/threonine-protein-kinase-2-like-isoform-X1-[Harpia-harpyja]	XP_044606874.1-receptor-interacting-serine/threonine-protein-kinase-4-isoform-X1-[Equus-asinus]	XP_032283629.1-LOW-QUALITY-PROTEIN:-ankyrin-repeat-and-protein-kinase-domain-containing-protein-1-[Phoca-vitulina]	XP_029090308.1-caspase-2-isoform-X3-[Monodon-monoceros]	XP_030435592.1-caspase-8-isoform-X1-[Gopherus-evgoodei]	XP_034973336.1-caspase-9-[Zootoca-vivipara]	XP_041057693.1-caspase-8-like-isoform-X2-[Carcharodon-carcharias]	NP_001007817.1-FAS-associated-death-domain-protein-[Bos-taurus]	XP_059726032.1-TIR-domain-containing-adapter-molecule-1-[Haemorhous-mexicanus]	XP_059911164.1-nucleotide-binding-oligomerization-domain-containing-protein-1-[Gadus-macrocephalus]	XP_023411373.1-nucleotide-binding-oligomerization-domain-containing-protein-2-isoform-X1-[Loxodonta-africana] (2)	XP_013864482.1-PREDICTED:-interferon-regulatory-factor-6-[Austrofundulus-limnaeus]
XP_035530860.1-receptor-interacting-serine/threonine-protein-kinase-3-isoform-X1-[Morone-saxatilis]	XP_030771142.1-Z-DNA-binding-protein-1-isoform-X3-[Rhinopithecus-roxellana] (2)	XP_037672086.1-mixed-lineage-kinase-domain-like-protein-isoform-X1-[Choloepus-didactylus]	XP_040287905.1-receptor-interacting-serine/threonine-protein-kinase-1-isoform-X3-[Bufo-bufo]	XP_050760228.1-receptor-interacting-serine/threonine-protein-kinase-2-like-isoform-X2-[Gymnogyps-californianus]	XP_015994173.2-receptor-interacting-serine/threonine-protein-kinase-2-isoform-X3-[Rousettus-aegyptiacus]	XP_010084155.1-PREDICTED:-receptor-interacting-serine/threonine-protein-kinase-2-like-[Pterocles-gutturalis]	XP_049483758.1-receptor-interacting-serine/threonine-protein-kinase-4-[Panthera-uncia]	XP_019943566.1-PREDICTED:-ankyrin-repeat-and-protein-kinase-domain-containing-protein-1-[Paralichthys-olivaceus]	XP_016413956.1-PREDICTED:-caspase-2-like-isoform-X1-[Sinocyclocheilus-rhinocerous]	XP_025964762.1-caspase-8-like-isoform-X2-[Dromaius-novaehollandiae]	XP_028596391.1-caspase-9-[Podarcis-muralis]	XP_041659940.1-caspase-8-like-[Cheilinus-undulatus]	XP_050191473.1-LOW-QUALITY-PROTEIN:-FAS-associated-death-domain-protein-[Myiozetetes-cayanensis]	XP_056368776.1-TIR-domain-containing-adapter-molecule-1-[Oenanthe-melanoleuca]	XP_030214000.1-nucleotide-binding-oligomerization-domain-containing-protein-1-[Gadus-morhua] (2)	XP_044617080.1-nucleotide-binding-oligomerization-domain-containing-protein-2-isoform-X2-[Equus-asinus]	XP_008287643.1-PREDICTED:-interferon-regulatory-factor-6-[Stegastes-partitus]
XP_005859633.1-PREDICTED:-receptor-interacting-serine/threonine-protein-kinase-3-[Myotis-brandtii]	XP_017707650.1-PREDICTED:-Z-DNA-binding-protein-1-isoform-X1-[Rhinopithecus-bieti] (2)	XP_004704851.2-mixed-lineage-kinase-domain-like-protein-[Echinops-telfairi]	XP_023775529.1-receptor-interacting-serine/threonine-protein-kinase-1-[Cyanistes-caeruleus]	XP_020442407.1-receptor-interacting-serine/threonine-protein-kinase-2-isoform-X2-[Monopterus-albus]	XP_032543012.1-receptor-interacting-serine/threonine-protein-kinase-2-isoform-X2-[Chiroxiphia-lanceolata]	XP_009698812.1-PREDICTED:-receptor-interacting-serine/threonine-protein-kinase-2-like-[Cariama-cristata]	XP_044141684.1-receptor-interacting-serine/threonine-protein-kinase-4-like-[Bufo-gargarizans]	XP_034346329.1-ankyrin-repeat-and-protein-kinase-domain-containing-protein-1-isoform-X2-[Arvicanthis-niloticus]	XP_029592499.1-caspase-2-isoform-X2-[Salmo-trutta]	XP_054442186.1-caspase-8-[Pteronotus-parnellii-mesoamericanus]	XP_053256490.1-caspase-9-isoform-X2-[Podarcis-raffonei]	XP_014905925.1-PREDICTED:-caspase-8-like-[Poecilia-latipinna]	XP_034724099.1-FAS-associated-death-domain-protein-[Etheostoma-cragini]	XP_042833780.1-TIR-domain-containing-adapter-molecule-1-[Panthera-tigris]	XP_056448720.1-nucleotide-binding-oligomerization-domain-containing-protein-1-[Gadus-chalcogrammus]	XP_058383772.1-nucleotide-binding-oligomerization-domain-containing-protein-2-isoform-X2-[Diceros-bicornis-minor]	XP_022058850.1-interferon-regulatory-factor-6-[Acanthochromis-polyacanthus]
XP_036068335.1-receptor-interacting-serine/threonine-protein-kinase-3-isoform-X1-[Oryzias-melastigma]	XP_023087703.1-Z-DNA-binding-protein-1-isoform-X6-[Piliocolobus-tephrosceles] (2)	XP_023597697.1-LOW-QUALITY-PROTEIN:-mixed-lineage-kinase-domain-like-protein-[Trichechus-manatus-latirostris]	XP_006786487.1-receptor-interacting-serine/threonine-protein-kinase-1-isoform-X1-[Neolamprologus-brichardi]	XP_035993800.1-receptor-interacting-serine/threonine-protein-kinase-2-isoform-X3-[Fundulus-heteroclitus]	XP_010352162.1-receptor-interacting-serine/threonine-protein-kinase-2-[Rhinopithecus-roxellana]	XP_029577784.1-receptor-interacting-serine/threonine-protein-kinase-2-like-isoform-X1-[Salmo-trutta]	XP_023824210.1-receptor-interacting-serine/threonine-protein-kinase-4-[Salvelinus-alpinus]	XP_015277186.1-PREDICTED:-ankyrin-repeat-and-protein-kinase-domain-containing-protein-1-[Gekko-japonicus]	XP_004629082.1-caspase-2-isoform-X1-[Octodon-degus]	XP_025260630.1-caspase-8-isoform-X1-[Theropithecus-gelada]	XP_053256489.1-caspase-9-isoform-X1-[Podarcis-raffonei]	XP_034549214.1-caspase-8-like-[Notolabrus-celidotus]	XP_042100895.1-caspase-10-isoform-X2-[Ovis-aries]	XP_015220763.1-PREDICTED:-TIR-domain-containing-adapter-molecule-1-[Lepisosteus-oculatus]	XP_046899377.1-nucleotide-binding-oligomerization-domain-containing-protein-1-[Hypomesus-transpacificus]	XP_019499233.1-PREDICTED:-nucleotide-binding-oligomerization-domain-containing-protein-2-isoform-X1-[Hipposideros-armiger]	XP_023136466.1-interferon-regulatory-factor-6-[Amphiprion-ocellaris]
XP_044282778.1-receptor-interacting-serine/threonine-protein-kinase-3-isoform-X2-[Varanus-komodoensis]	XP_033042747.1-Z-DNA-binding-protein-1-isoform-X13-[Trachypithecus-francoisi] (2)	XP_006860370.1-PREDICTED:-LOW-QUALITY-PROTEIN:-mixed-lineage-kinase-domain-like-protein-[Chrysochloris-asiatica]	XP_037236372.1-receptor-interacting-serine/threonine-protein-kinase-1-[Falco-rusticolus]	XP_030159834.1-receptor-interacting-serine/threonine-protein-kinase-2-isoform-X1-[Lynx-canadensis]	XP_040288206.1-receptor-interacting-serine/threonine-protein-kinase-2-[Bufo-bufo]	XP_035399334.1-receptor-interacting-serine/threonine-protein-kinase-2-like-[Cygnus-atratus]	XP_048348291.1-receptor-interacting-serine/threonine-protein-kinase-4-[Sphaerodactylus-townsendi]	XP_035944136.1-LOW-QUALITY-PROTEIN:-ankyrin-repeat-and-protein-kinase-domain-containing-protein-1-[Halichoerus-grypus]	XP_036719740.1-caspase-2-isoform-X1-[Balaenoptera-musculus]	NP_001125222.2-caspase-8-[Pongo-abelii]	XP_053256491.1-caspase-9-isoform-X3-[Podarcis-raffonei]	XP_043871906.1-caspase-8-[Solea-senegalensis]	XP_005333369.1-FAS-associated-death-domain-protein-[Ictidomys-tridecemlineatus]	XP_036739881.2-TIR-domain-containing-adapter-molecule-1-[Manis-pentadactyla]	XP_010883447.1-nucleotide-binding-oligomerization-domain-containing-protein-1-isoform-X2-[Esox-lucius]	XP_021787646.2-nucleotide-binding-oligomerization-domain-containing-protein-2-isoform-X6-[Papio-anubis]	XP_011612112.1-interferon-regulatory-factor-6-[Takifugu-rubripes]
XP_008294701.1-PREDICTED:-receptor-interacting-serine/threonine-protein-kinase-3-like-isoform-X1-[Stegastes-partitus]	XP_023087706.1-Z-DNA-binding-protein-1-isoform-X9-[Piliocolobus-tephrosceles] (2)	XP_012627935.1-mixed-lineage-kinase-domain-like-protein-[Microcebus-murinus]	XP_005554215.1-PREDICTED:-receptor-interacting-serine/threonine-protein-kinase-1-isoform-X1-[Macaca-fascicularis]	XP_048672886.1-receptor-interacting-serine/threonine-protein-kinase-2-like-isoform-X3-[Caretta-caretta]	XP_048020501.1-receptor-interacting-serine/threonine-protein-kinase-2-like-[Megalobrama-amblycephala]	XP_026712702.1-receptor-interacting-serine/threonine-protein-kinase-2-like-isoform-X2-[Athene-cunicularia]	XP_048822819.1-receptor-interacting-serine/threonine-protein-kinase-4-[Lagopus-muta]	XP_033971161.1-ankyrin-repeat-and-protein-kinase-domain-containing-protein-1-isoform-X2-[Trematomus-bernacchii]	XP_020753215.1-caspase-2-isoform-X2-[Odocoileus-virginianus-texanus]	XP_030065526.1-caspase-8-like-[Microcaecilia-unicolor]	XP_008123821.1-PREDICTED:-caspase-9-[Anolis-carolinensis]	XP_036713490.1-caspase-10-isoform-X2-[Balaenoptera-musculus]	XP_042337036.1-FAS-associated-death-domain-protein-like-[Plectropomus-leopardus]	XP_004619550.2-TIR-domain-containing-adapter-molecule-1-[Sorex-araneus]	XP_010883445.1-nucleotide-binding-oligomerization-domain-containing-protein-1-isoform-X1-[Esox-lucius]	XP_012619870.1-nucleotide-binding-oligomerization-domain-containing-protein-2-isoform-X3-[Microcebus-murinus]	XP_029007306.1-interferon-regulatory-factor-6-[Betta-splendens]
XP_033941983.1-receptor-interacting-serine/threonine-protein-kinase-3-like-isoform-X3-[Pseudochaenichthys-georgianus]	XP_023087693.1-Z-DNA-binding-protein-1-isoform-X3-[Piliocolobus-tephrosceles] (2)	XP_012496968.1-PREDICTED:-mixed-lineage-kinase-domain-like-protein-[Propithecus-coquereli]	XP_049467241.1-receptor-interacting-serine/threonine-protein-kinase-1-[Panthera-uncia]	XP_034410445.1-receptor-interacting-serine/threonine-protein-kinase-2-like-isoform-X2-[Cyclopterus-lumpus]	XP_031150231.1-receptor-interacting-serine/threonine-protein-kinase-2-isoform-X2-[Sander-lucioperca]	XP_048371206.1-receptor-interacting-serine/threonine-protein-kinase-2-like-[Sphaerodactylus-townsendi]	XP_034279852.1-receptor-interacting-serine/threonine-protein-kinase-4-[Pantherophis-guttatus]	XP_004604757.1-PREDICTED:-ankyrin-repeat-and-protein-kinase-domain-containing-protein-1-[Sorex-araneus]	XP_053464786.1-caspase-2-isoform-X1-[Nycticebus-coucang]	XP_009181029.1-caspase-8-isoform-X2-[Papio-anubis]	XP_042334054.1-caspase-9-isoform-X3-[Sceloporus-undulatus]	NP_001254591.1-caspase-8-[Gasterosteus-aculeatus]	XP_012589775.1-PREDICTED:-FAS-associated-death-domain-protein-[Condylura-cristata]	XP_040273664.1-TIR-domain-containing-adapter-molecule-1-[Bufo-bufo]	XP_041758369.2-nucleotide-binding-oligomerization-domain-containing-protein-1-[Coregonus-clupeaformis] (2)	XP_045389192.1-nucleotide-binding-oligomerization-domain-containing-protein-2-isoform-X2-[Lemur-catta] (2)	XP_033995140.1-interferon-regulatory-factor-6-[Trematomus-bernacchii]
XP_029310685.1-receptor-interacting-serine/threonine-protein-kinase-3-like-[Cottoperca-gobio]	XP_023087694.1-Z-DNA-binding-protein-1-isoform-X4-[Piliocolobus-tephrosceles] (2)	XP_019501947.1-PREDICTED:-mixed-lineage-kinase-domain-like-protein-[Hipposideros-armiger]	XP_018532023.1-receptor-interacting-serine/threonine-protein-kinase-1-isoform-X2-[Lates-calcarifer]	XP_032086506.1-receptor-interacting-serine/threonine-protein-kinase-2-like-[Thamnophis-elegans]	XP_046216354.1-receptor-interacting-serine/threonine-protein-kinase-2-like-[Oncorhynchus-gorbuscha]	XP_014163254.2-receptor-interacting-serine/threonine-protein-kinase-2-like-[Geospiza-fortis]	XP_015501444.1-receptor-interacting-serine/threonine-protein-kinase-4-[Parus-major]	XP_035240334.1-ankyrin-repeat-and-protein-kinase-domain-containing-protein-1-isoform-X1-[Anguilla-anguilla]	XP_016800926.2-caspase-2-isoform-X1-[Pan-troglodytes]	XP_022349064.1-caspase-8-isoform-X1-[Enhydra-lutris-kenyoni]	XP_042334052.1-caspase-9-isoform-X1-[Sceloporus-undulatus]	XP_040980283.1-caspase-10-isoform-X1-[Aquila-chrysaetos-chrysaetos]	XP_023248745.1-FAS-associated-death-domain-protein-like,-partial-[Seriola-lalandi-dorsalis]	XP_028569816.1-LOW-QUALITY-PROTEIN:-TIR-domain-containing-adapter-molecule-1-[Podarcis-muralis]	XP_041708624.2-LOW-QUALITY-PROTEIN:-nucleotide-binding-oligomerization-domain-containing-protein-1-like-[Coregonus-clupeaformis]	XP_048211582.1-nucleotide-binding-oligomerization-domain-containing-protein-2-isoform-X1-[Perognathus-longimembris-pacificus]	XP_034079835.1-interferon-regulatory-factor-6-[Gymnodraco-acuticeps]
XP_033853854.1-receptor-interacting-serine/threonine-protein-kinase-3-isoform-X3-[Acipenser-ruthenus]	XP_037597283.1-Z-DNA-binding-protein-1-isoform-X2-[Cebus-imitator] (2)	XP_019565962.1-PREDICTED:-mixed-lineage-kinase-domain-like-protein-isoform-X3-[Rhinolophus-sinicus]	XP_041660260.1-receptor-interacting-serine/threonine-protein-kinase-1-[Cheilinus-undulatus]	XP_039551553.1-receptor-interacting-serine/threonine-protein-kinase-2-isoform-X1-[Passer-montanus]	XP_032325744.1-receptor-interacting-serine/threonine-protein-kinase-2-[Camelus-ferus]	XP_028665533.2-receptor-interacting-serine/threonine-protein-kinase-2-[Erpetoichthys-calabaricus]	XP_022055047.1-receptor-interacting-serine/threonine-protein-kinase-4-[Acanthochromis-polyacanthus]	XP_008148454.1-ankyrin-repeat-and-protein-kinase-domain-containing-protein-1-isoform-X2-[Eptesicus-fuscus]	XP_034821035.1-caspase-2-isoform-X2-[Pan-paniscus]	XP_010563140.1-PREDICTED:-caspase-8-like-[Haliaeetus-leucocephalus]	XP_042334053.1-caspase-9-isoform-X2-[Sceloporus-undulatus]	XP_039700362.1-caspase-10-isoform-X9-[Pteropus-giganteus]	XP_015823426.1-FAS-associated-death-domain-protein-[Nothobranchius-furzeri]	XP_056149873.1-TIR-domain-containing-adapter-molecule-1-[Lampris-incognitus]	XP_036799524.1-nucleotide-binding-oligomerization-domain-containing-protein-1-isoform-X2-[Oncorhynchus-mykiss] (2)	XP_048211584.1-nucleotide-binding-oligomerization-domain-containing-protein-2-isoform-X3-[Perognathus-longimembris-pacificus]	XP_033940022.1-interferon-regulatory-factor-6-[Pseudochaenichthys-georgianus]
XP_047452449.1-receptor-interacting-serine/threonine-protein-kinase-3-like-isoform-X4-[Mugil-cephalus]	XP_037597282.1-Z-DNA-binding-protein-1-isoform-X1-[Cebus-imitator] (2)	XP_019565955.1-PREDICTED:-mixed-lineage-kinase-domain-like-protein-isoform-X1-[Rhinolophus-sinicus]	XP_026230891.1-receptor-(TNFRSF)-interacting-serine-threonine-kinase-1,-like-isoform-X2-[Anabas-testudineus]	XP_051722765.1-receptor-interacting-serine/threonine-protein-kinase-2-isoform-X1-[Ctenopharyngodon-idella]	XP_010403308.1-receptor-interacting-serine/threonine-protein-kinase-2-[Corvus-cornix-cornix]	XP_010016496.1-PREDICTED:-receptor-interacting-serine/threonine-protein-kinase-2-like-[Nestor-notabilis]	XP_034775221.1-receptor-interacting-serine/threonine-protein-kinase-4-like-[Acipenser-ruthenus]	XP_010380677.2-LOW-QUALITY-PROTEIN:-ankyrin-repeat-and-protein-kinase-domain-containing-protein-1-[Rhinopithecus-roxellana]	XP_028325583.1-caspase-2-isoform-X1-[Gouania-willdenowi]	XP_045223387.1-caspase-8-isoform-X4-[Macaca-fascicularis]	XP_020636894.1-caspase-9-[Pogona-vitticeps]	XP_024269953.1-caspase-8-isoform-X2-[Oncorhynchus-tshawytscha]	XP_054625604.1-protein-FADD-[Dunckerocampus-dactyliophorus]	XP_030073778.1-TIR-domain-containing-adapter-molecule-1-[Microcaecilia-unicolor]	XP_021481801.2-nucleotide-binding-oligomerization-domain-containing-protein-1-isoform-X1-[Oncorhynchus-mykiss]	XP_048211583.1-nucleotide-binding-oligomerization-domain-containing-protein-2-isoform-X2-[Perognathus-longimembris-pacificus]	XP_026205077.1-interferon-regulatory-factor-6-[Anabas-testudineus]
XP_021470386.2-receptor-interacting-serine/threonine-protein-kinase-4-[Oncorhynchus-mykiss]	XP_017392053.1-Z-DNA-binding-protein-1-isoform-X4-[Cebus-imitator] (2)	XP_019565970.1-PREDICTED:-mixed-lineage-kinase-domain-like-protein-isoform-X4-[Rhinolophus-sinicus]	XP_019607945.1-PREDICTED:-receptor-interacting-serine/threonine-protein-kinase-1-isoform-X2-[Rhinolophus-sinicus]	XP_041697556.2-receptor-interacting-serine/threonine-protein-kinase-2-like-[Coregonus-clupeaformis]	XP_048384444.1-receptor-interacting-serine/threonine-protein-kinase-2-isoform-X1-[Stegostoma-fasciatum]	XP_041742835.2-receptor-interacting-serine/threonine-protein-kinase-2-isoform-X2-[Coregonus-clupeaformis]	XP_010222738.1-PREDICTED:-receptor-interacting-serine/threonine-protein-kinase-4-[Tinamus-guttatus]	XP_041923602.1-ankyrin-repeat-and-protein-kinase-domain-containing-protein-1-isoform-X1-[Alosa-sapidissima]	XP_004474184.1-caspase-2-isoform-X2-[Dasypus-novemcinctus]	XP_042100894.1-caspase-8-isoform-X4-[Ovis-aries]	XP_028922495.1-caspase-9-isoform-X1-[Ornithorhynchus-anatinus]	XP_046700948.1-caspase-8-isoform-X2-[Silurus-meridionalis]	XP_022596977.1-FAS-associated-death-domain-protein-[Seriola-dumerili]	XP_033505506.1-TIR-domain-containing-adapter-molecule-1-[Epinephelus-lanceolatus]	XP_036799531.1-nucleotide-binding-oligomerization-domain-containing-protein-1-isoform-X3-[Oncorhynchus-mykiss]	XP_042549370.1-nucleotide-binding-oligomerization-domain-containing-protein-2-isoform-X2-[Dipodomys-spectabilis]	XP_037640079.1-interferon-regulatory-factor-6-[Sebastes-umbrosus]
XP_031149367.1-receptor-interacting-serine/threonine-protein-kinase-3-like-[Sander-lucioperca]	XP_017392052.1-Z-DNA-binding-protein-1-isoform-X3-[Cebus-imitator] (2)	XP_019565959.1-PREDICTED:-mixed-lineage-kinase-domain-like-protein-isoform-X2-[Rhinolophus-sinicus]	XP_040287904.1-receptor-interacting-serine/threonine-protein-kinase-1-isoform-X2-[Bufo-bufo]	XP_042353626.1-receptor-interacting-serine/threonine-protein-kinase-2-like-isoform-X2-[Plectropomus-leopardus]	XP_048276262.1-receptor-interacting-serine/threonine-protein-kinase-2-isoform-X2-[Myodes-glareolus]	XP_025957836.1-receptor-interacting-serine/threonine-protein-kinase-2-like-[Dromaius-novaehollandiae]	XP_027784986.1-receptor-interacting-serine/threonine-protein-kinase-4-[Marmota-flaviventris]	XP_036180298.1-ankyrin-repeat-and-protein-kinase-domain-containing-protein-1-isoform-X1-[Myotis-myotis]	XP_018538234.1-caspase-2-isoform-X3-[Lates-calcarifer]	XP_027534049.1-caspase-8-like-isoform-X2-[Neopelma-chrysocephalum]	XP_028922496.1-caspase-9-isoform-X2-[Ornithorhynchus-anatinus]	XP_043934182.1-caspase-8-like-isoform-X2-[Protopterus-annectens]	XP_018112847.1-FAS-associated-death-domain-protein-[Xenopus-laevis]	XP_010072321.1-PREDICTED:-TIR-domain-containing-adapter-molecule-1-[Pterocles-gutturalis]	XP_031642906.1-nucleotide-binding-oligomerization-domain-containing-protein-1-like-[Oncorhynchus-kisutch] (2)	XP_042549368.1-nucleotide-binding-oligomerization-domain-containing-protein-2-isoform-X1-[Dipodomys-spectabilis]	XP_045884889.1-interferon-regulatory-factor-6-[Micropterus-dolomieu]
XP_049430056.1-receptor-interacting-serine/threonine-protein-kinase-3-like-isoform-X1-[Epinephelus-fuscoguttatus]	XP_032113095.1-Z-DNA-binding-protein-1-isoform-X2-[Sapajus-apella] (2)	XP_032985082.1-mixed-lineage-kinase-domain-like-protein-isoform-X2-[Rhinolophus-ferrumequinum]	XP_014436926.1-receptor-interacting-serine/threonine-protein-kinase-1-isoform-X3-[Pelodiscus-sinensis]	XP_029332678.1-receptor-interacting-serine/threonine-protein-kinase-2-isoform-X2-[Mus-caroli]	XP_040443633.1-receptor-interacting-serine/threonine-protein-kinase-2-[Falco-naumanni]	XP_027764837.1-receptor-interacting-serine/threonine-protein-kinase-2-like-[Empidonax-traillii]	XP_034462941.1-receptor-interacting-serine/threonine-protein-kinase-4-[Hippoglossus-hippoglossus]	XP_014640636.1-PREDICTED:-ankyrin-repeat-and-protein-kinase-domain-containing-protein-1-[Ceratotherium-simum-simum]	XP_031641817.1-caspase-2-like-isoform-X1-[Oncorhynchus-kisutch]	XP_033371840.1-caspase-8-like-isoform-X1-[Parus-major]	XP_038602497.1-caspase-9-isoform-X1-[Tachyglossus-aculeatus]	XP_009949374.1-PREDICTED:-caspase-10-[Leptosomus-discolor]	XP_007466076.1-PREDICTED:-FAS-associated-death-domain-protein-[Lipotes-vexillifer]	XP_013158110.1-TIR-domain-containing-adapter-molecule-1-[Falco-peregrinus]	XP_024260826.1-nucleotide-binding-oligomerization-domain-containing-protein-1-isoform-X1-[Oncorhynchus-tshawytscha] (2)	XP_012883453.1-PREDICTED:-nucleotide-binding-oligomerization-domain-containing-protein-2-isoform-X2-[Dipodomys-ordii] (2)	XP_038553215.1-interferon-regulatory-factor-6-isoform-X1-[Micropterus-salmoides]
XP_007640854.2-receptor-interacting-serine/threonine-protein-kinase-3-[Cricetulus-griseus]	XP_032113094.1-Z-DNA-binding-protein-1-isoform-X1-[Sapajus-apella] (2)	XP_032985083.1-mixed-lineage-kinase-domain-like-protein-isoform-X3-[Rhinolophus-ferrumequinum]	XP_031445155.1-receptor-interacting-serine/threonine-protein-kinase-1-isoform-X2-[Phasianus-colchicus]	XP_036788468.1-receptor-interacting-serine/threonine-protein-kinase-2-isoform-X3-[Manis-pentadactyla]	XP_039672358.1-receptor-interacting-serine/threonine-protein-kinase-2-like-isoform-X2-[Perca-fluviatilis]	XP_012960735.2-receptor-interacting-serine/threonine-protein-kinase-2-isoform-X2-[Anas-platyrhynchos]	XP_019331967.1-PREDICTED:-receptor-interacting-serine/threonine-protein-kinase-4-[Alligator-mississippiensis]	XP_005579729.3-LOW-QUALITY-PROTEIN:-ankyrin-repeat-and-protein-kinase-domain-containing-protein-1-[Macaca-fascicularis]	XP_019724549.1-PREDICTED:-caspase-2-isoform-X3-[Hippocampus-comes]	NP_001358980.1-caspase-8-isoform-2-precursor-[Homo-sapiens]	XP_038602499.1-caspase-9-isoform-X3-[Tachyglossus-aculeatus]	XP_029499008.1-caspase-8-like-isoform-X1-[Oncorhynchus-nerka]	XP_024151492.1-protein-FADD-[Oryzias-melastigma]	XP_043908481.1-TIR-domain-containing-adapter-molecule-1-[Solea-senegalensis]	XP_024260827.1-nucleotide-binding-oligomerization-domain-containing-protein-1-isoform-X2-[Oncorhynchus-tshawytscha]	XP_012883451.1-PREDICTED:-nucleotide-binding-oligomerization-domain-containing-protein-2-isoform-X1-[Dipodomys-ordii] (2)	XP_038553217.1-interferon-regulatory-factor-6-isoform-X2-[Micropterus-salmoides]
XP_046251149.1-receptor-interacting-serine/threonine-protein-kinase-3-like-isoform-X1-[Scatophagus-argus]	XP_032113096.1-Z-DNA-binding-protein-1-isoform-X3-[Sapajus-apella] (2)	XP_032985081.1-mixed-lineage-kinase-domain-like-protein-isoform-X1-[Rhinolophus-ferrumequinum]	XP_019377521.1-PREDICTED:-receptor-interacting-serine/threonine-protein-kinase-1-isoform-X2-[Gavialis-gangeticus]	XP_017512986.1-receptor-interacting-serine/threonine-protein-kinase-2-isoform-X2-[Manis-javanica]	XP_017681971.1-PREDICTED:-receptor-interacting-serine/threonine-protein-kinase-2-isoform-X2-[Lepidothrix-coronata]	XP_038846917.1-receptor-interacting-serine/threonine-protein-kinase-2-isoform-X1-[Salvelinus-namaycush]	XP_041656519.1-receptor-interacting-serine/threonine-protein-kinase-4-[Cheilinus-undulatus]	XP_042270425.1-ankyrin-repeat-and-protein-kinase-domain-containing-protein-1-[Thunnus-maccoyii]	XP_002924213.1-caspase-2-isoform-X1-[Ailuropoda-melanoleuca]	XP_010711755.1-caspase-8-[Meleagris-gallopavo]	XP_038602498.1-caspase-9-isoform-X2-[Tachyglossus-aculeatus]	XP_030219511.1-caspase-8-like-isoform-X1-[Gadus-morhua]	XP_008972424.2-caspase-10-isoform-X4-[Pan-paniscus]	XP_011822758.1-PREDICTED:-TIR-domain-containing-adapter-molecule-1-[Mandrillus-leucophaeus]	XP_046158629.1-nucleotide-binding-oligomerization-domain-containing-protein-1-like-isoform-X2-[Oncorhynchus-gorbuscha] (2)	XP_021116579.1-nucleotide-binding-oligomerization-domain-containing-protein-2-isoform-X3-[Heterocephalus-glaber] (2)	XP_032368925.1-interferon-regulatory-factor-6-[Etheostoma-spectabile]
XP_019657159.2-receptor-interacting-serine/threonine-protein-kinase-3-isoform-X2-[Ailuropoda-melanoleuca]	XP_010341446.1-Z-DNA-binding-protein-1-[Saimiri-boliviensis-boliviensis] (2)	XP_015999388.1-mixed-lineage-kinase-domain-like-protein-isoform-X2-[Rousettus-aegyptiacus]	XP_038573853.1-receptor-interacting-serine/threonine-protein-kinase-1-isoform-X2-[Micropterus-salmoides]	XP_032277716.1-receptor-interacting-serine/threonine-protein-kinase-2-[Phoca-vitulina]	XP_005042333.1-PREDICTED:-receptor-interacting-serine/threonine-protein-kinase-2-isoform-X1-[Ficedula-albicollis]	XP_034760548.1-receptor-interacting-serine/threonine-protein-kinase-2-like-[Acipenser-ruthenus]	XP_031539965.1-receptor-interacting-serine/threonine-protein-kinase-4-[Vicugna-pacos]	XP_051719890.1-ankyrin-repeat-and-protein-kinase-domain-containing-protein-1-isoform-X1-[Ctenopharyngodon-idella]	XP_045421114.1-caspase-2-isoform-X2-[Lemur-catta]	XP_048725615.1-caspase-8-[Caretta-caretta]	XP_023388418.1-caspase-9-[Pteropus-vampyrus]	XP_042163667.1-caspase-8-isoform-X3-[Oncorhynchus-tshawytscha]	XP_054826229.1-LOW-QUALITY-PROTEIN:-FAS-associated-death-domain-protein-[Eublepharis-macularius]	XP_004771537.1-TIR-domain-containing-adapter-molecule-1-[Mustela-putorius-furo]	XP_046158628.1-nucleotide-binding-oligomerization-domain-containing-protein-1-like-isoform-X1-[Oncorhynchus-gorbuscha] (2)	XP_010627508.1-nucleotide-binding-oligomerization-domain-containing-protein-2-isoform-X1-[Fukomys-damarensis]	XP_034724330.1-interferon-regulatory-factor-6-[Etheostoma-cragini]
XP_044213103.1-receptor-interacting-serine/threonine-protein-kinase-3-like-isoform-X2-[Thunnus-albacares]	XP_012322937.1-Z-DNA-binding-protein-1-isoform-X2-[Aotus-nancymaae] (2)	XP_015999382.1-mixed-lineage-kinase-domain-like-protein-isoform-X1-[Rousettus-aegyptiacus]	XP_011749069.1-receptor-interacting-serine/threonine-protein-kinase-1-isoform-X1-[Macaca-nemestrina]	XP_012423459.1-PREDICTED:-receptor-interacting-serine/threonine-protein-kinase-2-isoform-X2-[Odobenus-rosmarus-divergens]	NP_620402.1-receptor-interacting-serine/threonine-protein-kinase-2-isoform-1-[Mus-musculus]	XP_017679864.1-PREDICTED:-receptor-interacting-serine/threonine-protein-kinase-2-like-isoform-X1-[Lepidothrix-coronata]	XP_020785818.1-receptor-interacting-serine/threonine-protein-kinase-4-like-[Boleophthalmus-pectinirostris]	XP_025924440.1-ankyrin-repeat-and-protein-kinase-domain-containing-protein-1-[Apteryx-rowi]	XP_056236250.1-caspase-2-isoform-X4-[Seriola-aureovittata]	XP_015986571.1-caspase-8-isoform-X2-[Rousettus-aegyptiacus]	XP_019495386.1-PREDICTED:-caspase-9-isoform-X2-[Hipposideros-armiger]	XP_053296724.1-caspase-8-[Pleuronectes-platessa]	XP_008496537.1-FAS-associated-death-domain-protein-[Calypte-anna]	XP_009316684.1-PREDICTED:-TIR-domain-containing-adapter-molecule-1-[Pygoscelis-adeliae]	XP_052345829.1-nucleotide-binding-oligomerization-domain-containing-protein-1-like-[Oncorhynchus-keta]	XP_010627522.1-nucleotide-binding-oligomerization-domain-containing-protein-2-isoform-X2-[Fukomys-damarensis]	XP_031143594.1-interferon-regulatory-factor-6-[Sander-lucioperca]
XP_005377064.1-PREDICTED:-receptor-interacting-serine/threonine-protein-kinase-3-isoform-X1-[Chinchilla-lanigera]	XP_012322936.1-Z-DNA-binding-protein-1-isoform-X1-[Aotus-nancymaae] (2)	XP_006908885.1-mixed-lineage-kinase-domain-like-protein-[Pteropus-alecto]	XP_035489934.2-receptor-interacting-serine/threonine-protein-kinase-1-[Scophthalmus-maximus]	XP_026642352.1-receptor-interacting-serine/threonine-protein-kinase-2-isoform-X3-[Microtus-ochrogaster]	XP_030607343.1-receptor-interacting-serine/threonine-protein-kinase-2-isoform-X2-[Archocentrus-centrarchus]	XP_036246295.1-receptor-interacting-serine/threonine-protein-kinase-2-like-[Molothrus-ater]	XP_045858594.1-receptor-interacting-serine/threonine-protein-kinase-4-isoform-X1-[Meles-meles]	XP_004273439.2-ankyrin-repeat-and-protein-kinase-domain-containing-protein-1-isoform-X2-[Orcinus-orca]	XP_047217617.1-caspase-2-isoform-X4-[Girardinichthys-multiradiatus]	XP_006133700.1-caspase-8-isoform-X1-[Pelodiscus-sinensis]	XP_019495384.1-PREDICTED:-caspase-9-isoform-X1-[Hipposideros-armiger]	XP_019347595.1-PREDICTED:-caspase-8-isoform-X2-[Alligator-mississippiensis]	XP_011842464.1-PREDICTED:-FAS-associated-death-domain-protein-[Mandrillus-leucophaeus]	XP_053559144.1-TIR-domain-containing-adapter-molecule-1-[Bombina-bombina]	XP_029535219.1-nucleotide-binding-oligomerization-domain-containing-protein-1-like-isoform-X1-[Oncorhynchus-nerka] (2)	XP_010627527.1-nucleotide-binding-oligomerization-domain-containing-protein-2-isoform-X3-[Fukomys-damarensis] (2)	XP_039654773.1-interferon-regulatory-factor-6-[Perca-fluviatilis]
XP_020468633.1-receptor-interacting-serine/threonine-protein-kinase-3-like-isoform-X1-[Monopterus-albus]	XP_054111455.1-Z-DNA-binding-protein-1-isoform-X2-[Callithrix-jacchus] (2)	XP_023378937.1-mixed-lineage-kinase-domain-like-protein-isoform-X1-[Pteropus-vampyrus]	XP_027749506.1-receptor-interacting-serine/threonine-protein-kinase-1-isoform-X1-[Empidonax-traillii]	XP_039878166.1-receptor-interacting-serine/threonine-protein-kinase-2-[Simochromis-diagramma]	XP_049603734.1-receptor-interacting-serine/threonine-protein-kinase-2-like-isoform-X2-[Syngnathus-scovelli]	XP_030907813.1-receptor-interacting-serine/threonine-protein-kinase-2-like-isoform-X1-[Melopsittacus-undulatus]	XP_005037240.1-PREDICTED:-receptor-interacting-serine/threonine-protein-kinase-4-[Ficedula-albicollis]	XP_047547556.1-LOW-QUALITY-PROTEIN:-ankyrin-repeat-and-protein-kinase-domain-containing-protein-1-like-[Lutra-lutra]	XP_012506048.1-PREDICTED:-caspase-2-[Propithecus-coquereli]	XP_034353039.1-caspase-8-[Arvicanthis-niloticus]	XP_032970813.1-caspase-9-isoform-X2-[Rhinolophus-ferrumequinum]	XP_020826538.1-caspase-10-isoform-X8-[Phascolarctos-cinereus]	XP_016805010.1-caspase-10-isoform-X5-[Pan-troglodytes]	XP_043989852.1-TIR-domain-containing-adapter-molecule-1-[Gambusia-affinis]	XP_029535220.1-nucleotide-binding-oligomerization-domain-containing-protein-1-like-isoform-X2-[Oncorhynchus-nerka] (2)	XP_010627540.1-nucleotide-binding-oligomerization-domain-containing-protein-2-isoform-X5-[Fukomys-damarensis]	XP_028431178.1-interferon-regulatory-factor-6-[Perca-flavescens]
XP_026168030.1-receptor-interacting-serine/threonine-protein-kinase-3-like-isoform-X2-[Mastacembelus-armatus]	XP_035154892.2-Z-DNA-binding-protein-1-isoform-X1-[Callithrix-jacchus] (2)	XP_011378220.1-mixed-lineage-kinase-domain-like-protein-isoform-X2-[Pteropus-vampyrus]	XP_031215321.1-receptor-interacting-serine/threonine-protein-kinase-1-[Mastomys-coucha]	XP_046178288.1-receptor-interacting-serine/threonine-protein-kinase-2-like-[Oncorhynchus-gorbuscha]	XP_045661970.1-receptor-interacting-serine/threonine-protein-kinase-2-isoform-X2-[Ursus-americanus]	XP_013982059.1-receptor-interacting-serine/threonine-protein-kinase-2-isoform-X2-[Salmo-salar]	XP_003219008.1-PREDICTED:-LOW-QUALITY-PROTEIN:-receptor-interacting-serine/threonine-protein-kinase-4-[Anolis-carolinensis]	XP_013010834.1-ankyrin-repeat-and-protein-kinase-domain-containing-protein-1-isoform-X2-[Cavia-porcellus]	XP_027684583.1-caspase-2-isoform-X2-[Chelonia-mydas]	XP_029081815.1-caspase-8-isoform-X2-[Monodon-monoceros]	XP_032970811.1-caspase-9-isoform-X1-[Rhinolophus-ferrumequinum]	XP_030199898.1-caspase-8-like-[Gadus-morhua]	XP_032919814.1-FAS-associated-death-domain-protein-[Catharus-ustulatus]	XP_021234663.1-TIR-domain-containing-adapter-molecule-1-like-isoform-X1-[Numida-meleagris]	XP_023844564.1-nucleotide-binding-oligomerization-domain-containing-protein-1-[Salvelinus-alpinus]	XP_010627531.1-nucleotide-binding-oligomerization-domain-containing-protein-2-isoform-X4-[Fukomys-damarensis] (2)	XP_029288568.1-interferon-regulatory-factor-6-[Cottoperca-gobio]
XP_043877451.1-receptor-interacting-serine/threonine-protein-kinase-3-isoform-X2-[Solea-senegalensis]	XP_055228530.1-Z-DNA-binding-protein-1-isoform-X3-[Gorilla-gorilla-gorilla] (2)	XP_039737014.1-mixed-lineage-kinase-domain-like-protein-isoform-X1-[Pteropus-giganteus]	XP_009277461.1-PREDICTED:-receptor-interacting-serine/threonine-protein-kinase-1-isoform-X1-[Aptenodytes-forsteri]	XP_048276261.1-receptor-interacting-serine/threonine-protein-kinase-2-isoform-X1-[Myodes-glareolus]	XP_011887170.1-PREDICTED:-receptor-interacting-serine/threonine-protein-kinase-2-isoform-X1-[Cercocebus-atys]	XP_009641540.1-receptor-interacting-serine/threonine-protein-kinase-2-isoform-X2-[Egretta-garzetta]	XP_040278976.1-receptor-interacting-serine/threonine-protein-kinase-4-like-[Bufo-bufo]	XP_048824345.1-ankyrin-repeat-and-protein-kinase-domain-containing-protein-1-[Lagopus-muta]	XP_047619260.1-caspase-2-isoform-X2-[Phacochoerus-africanus]	XP_021105896.1-caspase-8-isoform-X3-[Heterocephalus-glaber]	XP_019608691.1-PREDICTED:-caspase-9-isoform-X2-[Rhinolophus-sinicus]	XP_055734637.1-caspase-8-like-isoform-X1-[Salvelinus-fontinalis]	XP_030689093.1-FAS-associated-death-domain-protein-isoform-X1-[Globicephala-melas]	XP_049603251.1-TIR-domain-containing-adapter-molecule-1-[Syngnathus-scovelli]	XP_055781467.1-nucleotide-binding-oligomerization-domain-containing-protein-1-like-[Salvelinus-fontinalis]	XP_004643450.1-nucleotide-binding-oligomerization-domain-containing-protein-2-[Octodon-degus]	XP_044028177.1-interferon-regulatory-factor-6-isoform-X1-[Siniperca-chuatsi]
XP_041614966.1-receptor-interacting-serine/threonine-protein-kinase-3-isoform-X2-[Vulpes-lagopus]	XP_054960658.1-Z-DNA-binding-protein-1-isoform-X2-[Pan-paniscus] (2)	XP_039737016.1-mixed-lineage-kinase-domain-like-protein-isoform-X2-[Pteropus-giganteus]	XP_030629890.1-receptor-interacting-serine/threonine-protein-kinase-1-[Chanos-chanos]	XP_039930889.1-receptor-interacting-serine/threonine-protein-kinase-2-like-isoform-X2-[Hirundo-rustica]	XP_036193404.1-receptor-interacting-serine/threonine-protein-kinase-2-isoform-X3-[Myotis-myotis]	XP_013912546.1-PREDICTED:-receptor-interacting-serine/threonine-protein-kinase-2-like-[Thamnophis-sirtalis]	XP_034371723.1-receptor-interacting-serine/threonine-protein-kinase-4-[Arvicanthis-niloticus]	XP_037322127.1-ankyrin-repeat-and-protein-kinase-domain-containing-protein-1-[Pungitius-pungitius]	XP_014415372.2-LOW-QUALITY-PROTEIN:-caspase-2-[Camelus-ferus]	XP_014810035.1-PREDICTED:-caspase-8-like-isoform-X1-[Calidris-pugnax]	XP_019608690.1-PREDICTED:-caspase-9-isoform-X1-[Rhinolophus-sinicus]	XP_056606105.1-caspase-8-isoform-X3-[Triplophysa-dalaica]	XP_021462679.1-protein-FADD-[Oncorhynchus-mykiss]	XP_022057778.1-TIR-domain-containing-adapter-molecule-1-[Acanthochromis-polyacanthus]	XP_038850514.1-nucleotide-binding-oligomerization-domain-containing-protein-1-like-isoform-X2-[Salvelinus-namaycush] (2)	XP_003477732.2-nucleotide-binding-oligomerization-domain-containing-protein-2-isoform-X2-[Cavia-porcellus] (2)	XP_044028199.1-interferon-regulatory-factor-6-isoform-X2-[Siniperca-chuatsi]
XP_036094934.1-receptor-interacting-serine/threonine-protein-kinase-3-isoform-X3-[Rousettus-aegyptiacus]	XP_054960657.1-Z-DNA-binding-protein-1-isoform-X1-[Pan-paniscus] (2)	XP_054434994.1-LOW-QUALITY-PROTEIN:-mixed-lineage-kinase-domain-like-protein-[Pteronotus-parnellii-mesoamericanus]	XP_003805603.1-receptor-interacting-serine/threonine-protein-kinase-1-isoform-X1-[Pan-paniscus]	XP_008106622.1-PREDICTED:-receptor-interacting-serine/threonine-protein-kinase-2-[Anolis-carolinensis]	XP_034559580.1-receptor-interacting-serine/threonine-protein-kinase-2-like-isoform-X1-[Notolabrus-celidotus]	XP_051485596.1-receptor-interacting-serine/threonine-protein-kinase-2-like-[Apus-apus]	XP_038129793.1-receptor-interacting-serine/threonine-protein-kinase-4-[Cyprinodon-tularosa]	XP_038550202.1-ankyrin-repeat-and-protein-kinase-domain-containing-protein-1-isoform-X1-[Micropterus-salmoides]	XP_039885950.1-caspase-2-isoform-X3-[Simochromis-diagramma]	XP_048200929.1-caspase-8-[Perognathus-longimembris-pacificus]	XP_024410475.2-caspase-9-[Desmodus-rotundus]	XP_008175922.1-caspase-10-isoform-X1-[Chrysemys-picta-bellii]	XP_044872804.1-FAS-associated-death-domain-protein-[Mauremys-mutica]	XP_060738156.1-TIR-domain-containing-adapter-molecule-1-[Tachysurus-vachellii]	XP_038850513.1-nucleotide-binding-oligomerization-domain-containing-protein-1-like-isoform-X1-[Salvelinus-namaycush]	XP_012996948.1-nucleotide-binding-oligomerization-domain-containing-protein-2-isoform-X1-[Cavia-porcellus] (2)	XP_030274363.1-interferon-regulatory-factor-6-[Sparus-aurata]
XP_044213104.1-receptor-interacting-serine/threonine-protein-kinase-3-like-[Thunnus-albacares]	XP_054960659.1-Z-DNA-binding-protein-1-isoform-X5-[Pan-paniscus] (2)	XP_035868106.1-mixed-lineage-kinase-domain-like-protein-[Phyllostomus-discolor]	XP_008332520.1-receptor-interacting-serine/threonine-protein-kinase-1-[Cynoglossus-semilaevis] (3)	XP_047224753.1-receptor-interacting-serine/threonine-protein-kinase-2-like-isoform-X1-[Girardinichthys-multiradiatus]	XP_028449851.1-receptor-interacting-serine/threonine-protein-kinase-2-isoform-X1-[Perca-flavescens]	XP_013796697.1-PREDICTED:-receptor-interacting-serine/threonine-protein-kinase-2-like-[Apteryx-mantelli-mantelli]	XP_032721187.1-receptor-interacting-serine/threonine-protein-kinase-4-[Lontra-canadensis]	XP_026049467.1-ankyrin-repeat-and-protein-kinase-domain-containing-protein-1-[Astatotilapia-calliptera]	NP_001082384.1-uncharacterized-protein-LOC398436-[Xenopus-laevis]	XP_053803372.1-caspase-8-like-[Vidua-chalybeata]	XP_028369476.1-caspase-9-[Phyllostomus-discolor]	XP_041700205.1-caspase-8-[Coregonus-clupeaformis]	XP_038664342.1-protein-FADD-[Scyliorhinus-canicula]	XP_041914106.1-TIR-domain-containing-adapter-molecule-1-[Alosa-sapidissima]	XP_029599413.1-nucleotide-binding-oligomerization-domain-containing-protein-1-like-[Salmo-trutta]	XP_049642021.1-nucleotide-binding-oligomerization-domain-containing-protein-2-[Suncus-etruscus] (2)	XP_036957788.1-interferon-regulatory-factor-6-[Acanthopagrus-latus]
XP_014039287.1-serine/threonine-protein-kinase-10-like-isoform-X1-[Salmo-salar]	XP_054960660.1-Z-DNA-binding-protein-1-isoform-X7-[Pan-paniscus] (2)	XP_045674728.1-mixed-lineage-kinase-domain-like-protein-[Phyllostomus-hastatus]	XP_010966884.1-receptor-interacting-serine/threonine-protein-kinase-1-[Camelus-bactrianus]	XP_009676554.1-PREDICTED:-receptor-interacting-serine/threonine-protein-kinase-2-like-[Struthio-camelus-australis]	XP_013881212.1-PREDICTED:-receptor-interacting-serine/threonine-protein-kinase-2-isoform-X1-[Austrofundulus-limnaeus]	XP_046202234.1-receptor-interacting-serine/threonine-protein-kinase-2-like-isoform-X3-[Oncorhynchus-gorbuscha]	XP_009868045.1-PREDICTED:-LOW-QUALITY-PROTEIN:-receptor-interacting-serine/threonine-protein-kinase-4-like-[Apaloderma-vittatum]	XP_036114874.1-ankyrin-repeat-and-protein-kinase-domain-containing-protein-1-[Molossus-molossus]	XP_055203110.1-caspase-2-isoform-X3-[Gorilla-gorilla-gorilla]	XP_032046569.1-caspase-8-like-[Aythya-fuligula]	XP_045715898.1-caspase-9-isoform-X1-[Phyllostomus-hastatus]	XP_057883786.1-caspase-10-[Melospiza-georgiana]	XP_045414182.1-FAS-associated-death-domain-protein-[Lemur-catta]	XP_010159112.1-PREDICTED:-LOW-QUALITY-PROTEIN:-TIR-domain-containing-adapter-molecule-1-[Eurypyga-helias]	XP_045574575.1-nucleotide-binding-oligomerization-domain-containing-protein-1-like-isoform-X3-[Salmo-salar] (2)	XP_004600730.2-nucleotide-binding-oligomerization-domain-containing-protein-2-[Sorex-araneus]	XP_041809362.1-interferon-regulatory-factor-6-[Chelmon-rostratus]
XP_042073856.1-receptor-interacting-serine/threonine-protein-kinase-3,-partial-[Haplochromis-burtoni]	XP_055228529.1-Z-DNA-binding-protein-1-isoform-X1-[Gorilla-gorilla-gorilla] (2)	XP_045047930.1-mixed-lineage-kinase-domain-like-protein-isoform-X2-[Desmodus-rotundus]	XP_043921275.1-receptor-interacting-serine/threonine-protein-kinase-1-isoform-X3-[Protopterus-annectens]	XP_049638374.1-receptor-interacting-serine/threonine-protein-kinase-2-[Suncus-etruscus]	XP_020318696.1-receptor-interacting-serine/threonine-protein-kinase-2-[Oncorhynchus-kisutch]	XP_026651519.1-receptor-interacting-serine/threonine-protein-kinase-2-[Zonotrichia-albicollis]	XP_003735450.2-receptor-interacting-serine/threonine-protein-kinase-4-isoform-X1-[Callithrix-jacchus]	XP_032905360.1-ankyrin-repeat-and-protein-kinase-domain-containing-protein-1-isoform-X1-[Amblyraja-radiata]	XP_041490931.1-caspase-2-isoform-X2-[Microtus-oregoni]	XP_045003483.1-caspase-8-isoform-X2-[Jaculus-jaculus]	XP_045715899.1-caspase-9-isoform-X2-[Phyllostomus-hastatus]	XP_040458658.1-caspase-10-isoform-X3-[Falco-naumanni]	XP_053304759.1-FAS-associated-death-domain-protein-[Spea-bombifrons]	XP_006110580.2-LOW-QUALITY-PROTEIN:-TIR-domain-containing-adapter-molecule-1-[Pelodiscus-sinensis]	XP_045574574.1-nucleotide-binding-oligomerization-domain-containing-protein-1-like-isoform-X2-[Salmo-salar] (2)	XP_055992425.1-nucleotide-binding-oligomerization-domain-containing-protein-2-[Sorex-fumeus]	XP_046239768.1-interferon-regulatory-factor-6-[Scatophagus-argus]
XP_017536647.1-receptor-interacting-serine/threonine-protein-kinase-3-isoform-X2-[Manis-javanica]	XP_055228532.1-Z-DNA-binding-protein-1-isoform-X5-[Gorilla-gorilla-gorilla] (2)	XP_024411697.1-mixed-lineage-kinase-domain-like-protein-isoform-X1-[Desmodus-rotundus]	XP_026570799.1-receptor-interacting-serine/threonine-protein-kinase-1-[Pseudonaja-textilis]	XP_014820946.1-PREDICTED:-receptor-interacting-serine/threonine-protein-kinase-2-isoform-X1-[Calidris-pugnax]	XP_038601573.1-receptor-interacting-serine/threonine-protein-kinase-2-[Tachyglossus-aculeatus]	XP_019139741.2-receptor-interacting-serine/threonine-protein-kinase-2-[Corvus-cornix-cornix]	XP_027699386.1-receptor-interacting-serine/threonine-protein-kinase-4-isoform-X1-[Vombatus-ursinus]	XP_034346328.1-ankyrin-repeat-and-protein-kinase-domain-containing-protein-1-isoform-X1-[Arvicanthis-niloticus]	XP_042710967.1-caspase-2-isoform-X2-[Chrysemys-picta-bellii]	NP_001039435.1-caspase-8-[Bos-taurus]	XP_037002012.2-caspase-9-[Artibeus-jamaicensis]	XP_009483191.1-PREDICTED:-caspase-10-[Pelecanus-crispus]	XP_051561862.1-protein-FADD-[Myxocyprinus-asiaticus]	XP_041086253.1-TIR-domain-containing-adapter-molecule-1-like-[Polyodon-spathula]	XP_014056725.1-nucleotide-binding-oligomerization-domain-containing-protein-1-like-isoform-X1-[Salmo-salar] (2)	XP_006897170.1-PREDICTED:-nucleotide-binding-oligomerization-domain-containing-protein-2-[Elephantulus-edwardii] (2)	XP_027135578.1-interferon-regulatory-factor-6-isoform-X2-[Larimichthys-crocea]
XP_039665422.1-receptor-interacting-serine/threonine-protein-kinase-3-like-isoform-X3-[Perca-fluviatilis]	XP_009214140.2-Z-DNA-binding-protein-1-isoform-X2-[Papio-anubis] (2)	XP_053522690.1-mixed-lineage-kinase-domain-like-protein-isoform-X3-[Artibeus-jamaicensis]	XP_033839023.1-receptor-interacting-serine/threonine-protein-kinase-1-[Periophthalmus-magnuspinnatus]	XP_048795121.1-receptor-interacting-serine/threonine-protein-kinase-2-[Lagopus-muta]	XP_027698818.1-receptor-interacting-serine/threonine-protein-kinase-2-isoform-X1-[Vombatus-ursinus]	XP_027502800.1-receptor-interacting-serine/threonine-protein-kinase-2-like-[Corapipo-altera]	XP_036098975.1-receptor-interacting-serine/threonine-protein-kinase-4-[Molossus-molossus]	XP_024610017.1-ankyrin-repeat-and-protein-kinase-domain-containing-protein-1-[Neophocaena-asiaeorientalis-asiaeorientalis]	XP_029140485.1-caspase-2-[Protobothrops-mucrosquamatus]	XP_042677852.1-caspase-8-like-[Centrocercus-urophasianus]	XP_036901063.1-caspase-9-[Sturnira-hondurensis]	XP_020316775.1-caspase-8-isoform-X3-[Oncorhynchus-kisutch]	XP_020472675.1-uncharacterized-protein-LOC109969832-[Monopterus-albus]	XP_033857826.3-TIR-domain-containing-adapter-molecule-1-[Acipenser-ruthenus]	XP_021448271.2-nucleotide-binding-oligomerization-domain-containing-protein-1-isoform-X1-[Oncorhynchus-mykiss] (2)	XP_004704736.1-nucleotide-binding-oligomerization-domain-containing-protein-2-[Echinops-telfairi]	XP_010740648.3-interferon-regulatory-factor-6-isoform-X1-[Larimichthys-crocea]
XP_036407820.1-receptor-interacting-serine/threonine-protein-kinase-3-isoform-X2-[Megalops-cyprinoides]	XP_050601557.1-Z-DNA-binding-protein-1-isoform-X4-[Macaca-thibetana-thibetana] (2)	XP_053522684.1-mixed-lineage-kinase-domain-like-protein-isoform-X1-[Artibeus-jamaicensis]	XP_049889171.1-receptor-interacting-serine/threonine-protein-kinase-1-isoform-X2-[Epinephelus-moara]	XP_022069156.1-receptor-interacting-serine/threonine-protein-kinase-2-isoform-X1-[Acanthochromis-polyacanthus]	NP_003812.1-receptor-interacting-serine/threonine-protein-kinase-2-isoform-1-[Homo-sapiens]	XP_030138544.3-LOW-QUALITY-PROTEIN:-receptor-interacting-serine/threonine-protein-kinase-2-like-[Taeniopygia-guttata]	XP_041255835.1-receptor-interacting-serine/threonine-protein-kinase-4-[Onychostruthus-taczanowskii]	XP_045559401.1-ankyrin-repeat-and-protein-kinase-domain-containing-protein-1-[Salmo-salar]	XP_003475318.1-caspase-2-isoform-X1-[Cavia-porcellus]	XP_052648928.1-caspase-8-like-isoform-X1-[Harpia-harpyja]	XP_054435608.1-caspase-9-[Pteronotus-parnellii-mesoamericanus]	XP_013043022.1-caspase-10-[Anser-cygnoides]	XP_005384295.1-PREDICTED:-FAS-associated-death-domain-protein-[Chinchilla-lanigera]	XP_010826467.1-PREDICTED:-TIR-domain-containing-adapter-molecule-1-[Bison-bison-bison]	XP_036826475.1-nucleotide-binding-oligomerization-domain-containing-protein-1-isoform-X2-[Oncorhynchus-mykiss]	XP_006873784.1-PREDICTED:-nucleotide-binding-oligomerization-domain-containing-protein-2-[Chrysochloris-asiatica] (2)	XP_035517005.1-interferon-regulatory-factor-6-[Morone-saxatilis]
XP_040272724.1-receptor-interacting-serine/threonine-protein-kinase-3-[Bufo-bufo]	XP_021776588.2-Z-DNA-binding-protein-1-isoform-X1-[Papio-anubis] (2)	XP_053522691.1-mixed-lineage-kinase-domain-like-protein-isoform-X4-[Artibeus-jamaicensis]	XP_008992287.1-receptor-interacting-serine/threonine-protein-kinase-1-isoform-X1-[Callithrix-jacchus]	XP_051990425.1-receptor-interacting-serine/threonine-protein-kinase-2-like-isoform-X1-[Xyrauchen-texanus]	XP_014045310.1-receptor-interacting-serine/threonine-protein-kinase-2-like-isoform-X2-[Salmo-salar]	XP_009319085.1-PREDICTED:-receptor-interacting-serine/threonine-protein-kinase-2-like-isoform-X2-[Pygoscelis-adeliae]	XP_034884738.1-receptor-interacting-serine/threonine-protein-kinase-4-[Mirounga-leonina]	XP_035411480.1-ankyrin-repeat-and-protein-kinase-domain-containing-protein-1-[Cygnus-atratus]	XP_042782859.1-caspase-2-isoform-X2-[Panthera-leo]	XP_052532309.1-caspase-8-[Tympanuchus-pallidicinctus]	XP_036112025.1-caspase-9-isoform-X3-[Molossus-molossus]	XP_053354822.1-uncharacterized-protein-LOC128526714-[Clarias-gariepinus]	XP_039924615.1-FAS-associated-death-domain-protein-[Hirundo-rustica]	XP_047633382.1-TIR-domain-containing-adapter-molecule-1-[Phacochoerus-africanus]	XP_035614435.2-nucleotide-binding-oligomerization-domain-containing-protein-1-like-[Oncorhynchus-keta]	XP_037671622.1-nucleotide-binding-oligomerization-domain-containing-protein-2-[Choloepus-didactylus] (2)	XP_051271475.1-interferon-regulatory-factor-6-[Dicentrarchus-labrax]
XP_033996988.1-receptor-interacting-serine/threonine-protein-kinase-4-like-isoform-X1-[Trematomus-bernacchii]	XP_045219114.1-Z-DNA-binding-protein-1-isoform-X1-[Macaca-fascicularis] (2)	XP_053522689.1-mixed-lineage-kinase-domain-like-protein-isoform-X2-[Artibeus-jamaicensis]	XP_036866856.1-receptor-interacting-serine/threonine-protein-kinase-1-[Manis-javanica]	XP_042529123.1-receptor-interacting-serine/threonine-protein-kinase-2-isoform-X1-[Dipodomys-spectabilis]	XP_039732957.1-receptor-interacting-serine/threonine-protein-kinase-2-isoform-X1-[Pteropus-giganteus]	XP_048672886.1-receptor-interacting-serine/threonine-protein-kinase-2-like-isoform-X3-[Caretta-caretta]	XP_030648664.1-receptor-interacting-serine/threonine-protein-kinase-4-isoform-X3-[Chanos-chanos]	XP_046493605.1-ankyrin-repeat-and-protein-kinase-domain-containing-protein-1-isoform-X1-[Equus-quagga]	XP_028832736.1-caspase-2-isoform-X1-[Denticeps-clupeoides]	XP_014810037.1-PREDICTED:-caspase-8-like-isoform-X2-[Calidris-pugnax]	XP_036112024.1-caspase-9-isoform-X2-[Molossus-molossus]	XP_048096048.1-caspase-8-isoform-X1-[Alosa-alosa]	XP_028626898.1-FAS-associated-death-domain-protein-[Grammomys-surdaster]	XP_055963237.1-LOW-QUALITY-PROTEIN:-TIR-domain-containing-adapter-molecule-1-[Sorex-fumeus]	XP_046169277.1-nucleotide-binding-oligomerization-domain-containing-protein-1-like-[Oncorhynchus-gorbuscha]	XP_004450484.2-nucleotide-binding-oligomerization-domain-containing-protein-2-isoform-X2-[Dasypus-novemcinctus]	XP_037304139.1-interferon-regulatory-factor-6-[Pungitius-pungitius]
XP_014338619.1-PREDICTED:-receptor-interacting-serine/threonine-protein-kinase-3-[Bos-mutus]	XP_050601554.1-Z-DNA-binding-protein-1-isoform-X1-[Macaca-thibetana-thibetana] (2)	XP_036919529.1-mixed-lineage-kinase-domain-like-protein-isoform-X3-[Sturnira-hondurensis]	XP_032740254.1-receptor-interacting-serine/threonine-protein-kinase-1-[Rattus-rattus]	XP_024058004.1-receptor-interacting-serine/threonine-protein-kinase-2-like-[Terrapene-carolina-triunguis]	XP_044223164.1-receptor-interacting-serine/threonine-protein-kinase-2-like-[Thunnus-albacares]	XP_035275948.1-receptor-interacting-serine/threonine-protein-kinase-2-isoform-X2-[Anguilla-anguilla]	XP_047575699.1-receptor-interacting-serine/threonine-protein-kinase-4-[Lutra-lutra]	XP_040282789.1-ankyrin-repeat-and-protein-kinase-domain-containing-protein-1-[Bufo-bufo]	XP_056301101.1-caspase-2-isoform-X5-[Pseudoliparis-swirei]	XP_033371843.1-caspase-8-isoform-X2-[Parus-major]	XP_036112023.1-caspase-9-isoform-X1-[Molossus-molossus]	XP_019378752.1-PREDICTED:-caspase-10-isoform-X2-[Gavialis-gangeticus]	XP_010634028.1-FAS-associated-death-domain-protein-[Fukomys-damarensis]	XP_058584351.1-TIR-domain-containing-adapter-molecule-1-isoform-X2-[Neofelis-nebulosa]	XP_020361424.2-nucleotide-binding-oligomerization-domain-containing-protein-1-like-[Oncorhynchus-kisutch]	XP_004450483.2-nucleotide-binding-oligomerization-domain-containing-protein-2-isoform-X1-[Dasypus-novemcinctus]	XP_054472142.1-interferon-regulatory-factor-6-[Anoplopoma-fimbria]
XP_037308480.1-receptor-interacting-serine/threonine-protein-kinase-3-like-isoform-X1-[Pungitius-pungitius]	XP_023087704.1-Z-DNA-binding-protein-1-isoform-X7-[Piliocolobus-tephrosceles] (2)	XP_036919528.1-mixed-lineage-kinase-domain-like-protein-isoform-X2-[Sturnira-hondurensis]	XP_020832317.1-receptor-interacting-serine/threonine-protein-kinase-1-isoform-X3-[Phascolarctos-cinereus]	XP_026712701.1-receptor-interacting-serine/threonine-protein-kinase-2-like-isoform-X1-[Athene-cunicularia]	XP_025910332.1-receptor-interacting-serine/threonine-protein-kinase-2-isoform-X1-[Nothoprocta-perdicaria]	XP_014797789.1-PREDICTED:-receptor-interacting-serine/threonine-protein-kinase-2-like-[Calidris-pugnax]	XP_016353673.1-PREDICTED:-receptor-interacting-serine/threonine-protein-kinase-4-[Sinocyclocheilus-anshuiensis]	XP_004052199.3-LOW-QUALITY-PROTEIN:-ankyrin-repeat-and-protein-kinase-domain-containing-protein-1-[Gorilla-gorilla-gorilla]	XP_020466439.1-caspase-2-isoform-X3-[Monopterus-albus]	XP_027492624.1-caspase-8-like-[Corapipo-altera]	XP_028011365.2-caspase-9-[Eptesicus-fuscus]	XP_056436300.1-caspase-8-like-[Gadus-chalcogrammus]	XP_006893442.1-PREDICTED:-protein-FADD-[Elephantulus-edwardii]	XP_029141819.1-TIR-domain-containing-adapter-molecule-1-[Protobothrops-mucrosquamatus]	XP_042165854.1-nucleotide-binding-oligomerization-domain-containing-protein-1-like-[Oncorhynchus-tshawytscha] (2)	XP_004450485.2-nucleotide-binding-oligomerization-domain-containing-protein-2-isoform-X3-[Dasypus-novemcinctus]	XP_031709997.1-interferon-regulatory-factor-6-[Anarrhichthys-ocellatus]
XP_024412016.1-receptor-interacting-serine/threonine-protein-kinase-3-isoform-X1-[Desmodus-rotundus]	XP_023087692.1-Z-DNA-binding-protein-1-isoform-X2-[Piliocolobus-tephrosceles] (2)	XP_036919525.1-mixed-lineage-kinase-domain-like-protein-isoform-X1-[Sturnira-hondurensis]	XP_045861883.1-receptor-interacting-serine/threonine-protein-kinase-1-[Meles-meles]	XP_048142315.1-receptor-interacting-serine/threonine-protein-kinase-2-[Corvus-hawaiiensis]	XP_052507808.1-receptor-interacting-serine/threonine-protein-kinase-2-[Budorcas-taxicolor]	XP_025911712.1-receptor-interacting-serine/threonine-protein-kinase-2-like-[Apteryx-rowi]	XP_031956967.1-LOW-QUALITY-PROTEIN:-receptor-interacting-serine/threonine-protein-kinase-4-[Corvus-moneduloides]	XP_044138212.1-ankyrin-repeat-and-protein-kinase-domain-containing-protein-1-[Bufo-gargarizans]	XP_034030452.1-caspase-2-isoform-X2-[Thalassophryne-amazonica]	XP_012781187.1-caspase-8-[Ochotona-princeps]	XP_045441141.1-caspase-9-isoform-X2-[Pipistrellus-kuhlii]	XP_011607729.2-caspase-8-like-isoform-X1-[Takifugu-rubripes]	XP_024274396.1-protein-FADD-[Oncorhynchus-tshawytscha]	XP_004689386.1-PREDICTED:-TIR-domain-containing-adapter-molecule-1-[Condylura-cristata]	XP_029478245.1-nucleotide-binding-oligomerization-domain-containing-protein-1-like-[Oncorhynchus-nerka]	XP_016003062.2-nucleotide-binding-oligomerization-domain-containing-protein-2-isoform-X6-[Rousettus-aegyptiacus] (2)	XP_034389647.1-interferon-regulatory-factor-6-[Cyclopterus-lumpus]
XP_030282039.1-receptor-interacting-serine/threonine-protein-kinase-3-like-isoform-X1-[Sparus-aurata]	XP_023087695.1-Z-DNA-binding-protein-1-isoform-X5-[Piliocolobus-tephrosceles] (2)	XP_016053249.1-PREDICTED:-mixed-lineage-kinase-domain-like-protein-[Miniopterus-natalensis]	XP_036303615.1-receptor-interacting-serine/threonine-protein-kinase-1-isoform-X1-[Pipistrellus-kuhlii]	XP_042184512.1-receptor-interacting-serine/threonine-protein-kinase-2-isoform-X4-[Oncorhynchus-tshawytscha]	XP_037983599.1-receptor-interacting-serine/threonine-protein-kinase-2-[Motacilla-alba-alba]	XP_009812170.1-PREDICTED:-receptor-interacting-serine/threonine-protein-kinase-2-like-[Gavia-stellata]	XP_006898446.1-PREDICTED:-receptor-interacting-serine/threonine-protein-kinase-4-[Elephantulus-edwardii]	XP_046493606.1-ankyrin-repeat-and-protein-kinase-domain-containing-protein-1-isoform-X2-[Equus-quagga]	XP_044102704.1-caspase-2-isoform-X2-[Neogale-vison]	XP_027633378.1-caspase-8-isoform-X2-[Falco-peregrinus]	XP_036304066.1-caspase-9-isoform-X1-[Pipistrellus-kuhlii]	XP_039073741.1-caspase-10-isoform-X1-[Hyaena-hyaena]	XP_031702607.1-FAS-associated-death-domain-protein-[Anarrhichthys-ocellatus]	XP_020769932.1-TIR-domain-containing-adapter-molecule-1-[Odocoileus-virginianus-texanus]	XP_029593227.1-nucleotide-binding-oligomerization-domain-containing-protein-1-like-[Salmo-trutta]	XP_016003060.2-nucleotide-binding-oligomerization-domain-containing-protein-2-isoform-X3-[Rousettus-aegyptiacus] (2)	XP_056294491.1-interferon-regulatory-factor-6-isoform-X1-[Pseudoliparis-swirei]
XP_044841080.1-receptor-interacting-serine/threonine-protein-kinase-3-isoform-X1-[Mauremys-mutica]	XP_023087691.1-Z-DNA-binding-protein-1-isoform-X1-[Piliocolobus-tephrosceles] (2)	XP_036131819.1-mixed-lineage-kinase-domain-like-protein-isoform-X1-[Molossus-molossus]	XP_022442244.1-receptor-interacting-serine/threonine-protein-kinase-1-isoform-X1-[Delphinapterus-leucas]	XP_038204259.1-receptor-interacting-serine/threonine-protein-kinase-2-isoform-X1-[Arvicola-amphibius]	XP_047444473.1-receptor-interacting-serine/threonine-protein-kinase-2-like-isoform-X2-[Mugil-cephalus]	XP_009939266.1-PREDICTED:-receptor-interacting-serine/threonine-protein-kinase-2-like-[Opisthocomus-hoazin]	XP_005885794.2-PREDICTED:-receptor-interacting-serine/threonine-protein-kinase-4-[Myotis-brandtii]	XP_020455789.1-ankyrin-repeat-and-protein-kinase-domain-containing-protein-1-[Monopterus-albus]	XP_035866881.1-caspase-2-isoform-X1-[Phyllostomus-discolor]	XP_040840373.1-caspase-8-like-isoform-X2-[Ochotona-curzoniae]	XP_006766846.1-PREDICTED:-caspase-9-[Myotis-davidii]	XP_023698351.1-caspase-8-like-isoform-X2-[Paramormyrops-kingsleyae]	XP_039389337.1-FAS-associated-death-domain-protein-[Mauremys-reevesii]	XP_009707398.1-PREDICTED:-TIR-domain-containing-adapter-molecule-1-[Cariama-cristata]	XP_014014712.2-nucleotide-binding-oligomerization-domain-containing-protein-1-like-[Salmo-salar] (2)	XP_036087157.1-nucleotide-binding-oligomerization-domain-containing-protein-2-isoform-X5-[Rousettus-aegyptiacus]	XP_056294492.1-interferon-regulatory-factor-6-isoform-X2-[Pseudoliparis-swirei]
XP_039601771.1-receptor-interacting-serine/threonine-protein-kinase-3-[Polypterus-senegalus]	XP_033042746.1-Z-DNA-binding-protein-1-isoform-X12-[Trachypithecus-francoisi] (2)	XP_036131820.1-mixed-lineage-kinase-domain-like-protein-isoform-X2-[Molossus-molossus]	XP_036452641.1-receptor-interacting-serine/threonine-protein-kinase-1-[Colossoma-macropomum]	XP_048214725.1-receptor-interacting-serine/threonine-protein-kinase-2-isoform-X1-[Perognathus-longimembris-pacificus]	XP_011837989.1-PREDICTED:-receptor-interacting-serine/threonine-protein-kinase-2-[Mandrillus-leucophaeus]	XP_010221178.1-PREDICTED:-receptor-interacting-serine/threonine-protein-kinase-2-like-[Tinamus-guttatus]	XP_021513033.1-receptor-interacting-serine/threonine-protein-kinase-4-[Meriones-unguiculatus]	XP_015825934.1-PREDICTED:-ankyrin-repeat-and-protein-kinase-domain-containing-protein-1-[Nothobranchius-furzeri]	XP_034730113.1-caspase-2-isoform-X4-[Etheostoma-cragini]	XP_003820792.1-caspase-8-isoform-X1-[Pan-paniscus]	XP_023601704.1-caspase-9-isoform-X1-[Myotis-lucifugus]	XP_053185166.1-caspase-8-isoform-X2-[Scomber-japonicus]	XP_012613164.1-FAS-associated-death-domain-protein-[Microcebus-murinus]	XP_053293178.1-TIR-domain-containing-adapter-molecule-1-[Pleuronectes-platessa]	XP_029592492.1-nucleotide-binding-oligomerization-domain-containing-protein-1-like-[Salmo-trutta] (2)	XP_016003061.2-nucleotide-binding-oligomerization-domain-containing-protein-2-isoform-X4-[Rousettus-aegyptiacus]	XP_036008056.1-interferon-regulatory-factor-6-[Fundulus-heteroclitus]
XP_016354562.1-PREDICTED:-receptor-interacting-serine/threonine-protein-kinase-3-like-[Sinocyclocheilus-anshuiensis]	XP_033042726.1-Z-DNA-binding-protein-1-isoform-X2-[Trachypithecus-francoisi] (2)	XP_036131821.1-mixed-lineage-kinase-domain-like-protein-isoform-X3-[Molossus-molossus]	XP_049679912.1-receptor-interacting-serine/threonine-protein-kinase-1-[Accipiter-gentilis]	XP_038160809.1-receptor-interacting-serine/threonine-protein-kinase-2-isoform-X1-[Cyprinodon-tularosa]	XP_017723393.1-PREDICTED:-receptor-interacting-serine/threonine-protein-kinase-2-isoform-X1-[Rhinopithecus-bieti]	XP_052318008.1-receptor-interacting-serine/threonine-protein-kinase-2-like-isoform-X2-[Oncorhynchus-keta]	XP_019384518.1-PREDICTED:-receptor-interacting-serine/threonine-protein-kinase-4-isoform-X1-[Crocodylus-porosus]	XP_035801656.1-ankyrin-repeat-and-protein-kinase-domain-containing-protein-1-isoform-X2-[Amphiprion-ocellaris]	XP_033936097.1-caspase-2-isoform-X1-[Pseudochaenichthys-georgianus]	XP_007964024.1-caspase-8-isoform-X2-[Chlorocebus-sabaeus]	XP_006104818.1-caspase-9-isoform-X2-[Myotis-lucifugus]	XP_036815284.1-caspase-8-isoform-X1-[Oncorhynchus-mykiss]	XP_041268772.1-FAS-associated-death-domain-protein-[Onychostruthus-taczanowskii]	XP_043442191.1-TIR-domain-containing-adapter-molecule-1-[Prionailurus-bengalensis]	XP_021448286.2-nucleotide-binding-oligomerization-domain-containing-protein-1-[Oncorhynchus-mykiss] (2)	XP_060041555.1-nucleotide-binding-oligomerization-domain-containing-protein-2-isoform-X4-[Erinaceus-europaeus]	XP_029991335.1-interferon-regulatory-factor-6-[Sphaeramia-orbicularis]
XP_026117432.1-receptor-interacting-serine/threonine-protein-kinase-3-like-isoform-X1-[Carassius-auratus]	XP_033042734.1-Z-DNA-binding-protein-1-isoform-X9-[Trachypithecus-francoisi] (2)	XP_036296921.1-mixed-lineage-kinase-domain-like-protein-[Pipistrellus-kuhlii]	XP_037133083.1-receptor-interacting-serine/threonine-protein-kinase-1-[Syngnathus-acus]	XP_034470664.1-receptor-interacting-serine/threonine-protein-kinase-2-like-isoform-X1-[Hippoglossus-hippoglossus]	XP_029309325.1-receptor-interacting-serine/threonine-protein-kinase-2-isoform-X1-[Cottoperca-gobio]	XP_045074247.1-receptor-interacting-serine/threonine-protein-kinase-2-isoform-X1-[Coregonus-clupeaformis]	NP_001100573.1-receptor-interacting-serine/threonine-protein-kinase-4-[Rattus-norvegicus]	XP_005455859.1-ankyrin-repeat-and-protein-kinase-domain-containing-protein-1-[Oreochromis-niloticus]	XP_055454264.1-caspase-2-isoform-X3-[Psammomys-obesus]	XP_042730416.1-caspase-8-isoform-X2-[Lagopus-leucura]	XP_036207869.1-caspase-9-isoform-X2-[Myotis-myotis]	XP_041117553.1-caspase-8-like-isoform-X2-[Polyodon-spathula]	XP_032735613.1-FAS-associated-death-domain-protein-[Lontra-canadensis]	XP_012291832.1-TIR-domain-containing-adapter-molecule-1-[Aotus-nancymaae]	XP_046170535.1-nucleotide-binding-oligomerization-domain-containing-protein-1-like-[Oncorhynchus-gorbuscha] (2)	XP_060041554.1-nucleotide-binding-oligomerization-domain-containing-protein-2-isoform-X3-[Erinaceus-europaeus] (2)	XP_033822338.1-interferon-regulatory-factor-6-[Periophthalmus-magnuspinnatus]
XP_001114079.1-receptor-interacting-serine/threonine-protein-kinase-3-[Macaca-mulatta]	XP_033042730.1-Z-DNA-binding-protein-1-isoform-X5-[Trachypithecus-francoisi] (2)	XP_027998602.2-mixed-lineage-kinase-domain-like-protein-[Eptesicus-fuscus]	XP_010621058.1-receptor-interacting-serine/threonine-protein-kinase-1-isoform-X1-[Fukomys-damarensis]	XP_035592317.1-receptor-interacting-serine/threonine-protein-kinase-2-like-isoform-X1-[Oncorhynchus-keta]	XP_051785222.1-receptor-interacting-serine/threonine-protein-kinase-2-[Erpetoichthys-calabaricus]	XP_038825862.1-receptor-interacting-serine/threonine-protein-kinase-2-like-[Salvelinus-namaycush]	NP_065690.2-receptor-interacting-serine/threonine-protein-kinase-4-[Homo-sapiens]	XP_019063773.1-ankyrin-repeat-and-protein-kinase-domain-containing-protein-1-isoform-X3-[Fukomys-damarensis]	XP_054977323.1-caspase-2-isoform-X3-[Sorex-araneus]	XP_007501565.1-caspase-18-isoform-X1-[Monodelphis-domestica]	XP_036207868.1-caspase-9-isoform-X1-[Myotis-myotis]	XP_030180517.1-caspase-10-isoform-X2-[Lynx-canadensis]	XP_029313981.1-FAS-associated-death-domain-protein-[Cottoperca-gobio]	XP_007460599.1-PREDICTED:-TIR-domain-containing-adapter-molecule-1-[Lipotes-vexillifer]	XP_031643411.1-nucleotide-binding-oligomerization-domain-containing-protein-1-like-[Oncorhynchus-kisutch] (2)	XP_036131237.1-nucleotide-binding-oligomerization-domain-containing-protein-2-[Molossus-molossus] (2)	XP_020789660.1-interferon-regulatory-factor-6-[Boleophthalmus-pectinirostris]
XP_031309362.1-receptor-interacting-serine/threonine-protein-kinase-3-isoform-X2-[Camelus-dromedarius]	XP_033042725.1-Z-DNA-binding-protein-1-isoform-X1-[Trachypithecus-francoisi] (2)	XP_014313467.1-mixed-lineage-kinase-domain-like-protein-[Myotis-lucifugus]	XP_008158148.1-receptor-interacting-serine/threonine-protein-kinase-1-isoform-X1-[Eptesicus-fuscus]	XP_050747965.1-receptor-interacting-serine/threonine-protein-kinase-2-[Gymnogyps-californianus]	XP_017327505.1-receptor-interacting-serine/threonine-protein-kinase-2-[Ictalurus-punctatus]	XP_010311982.1-PREDICTED:-receptor-interacting-serine/threonine-protein-kinase-2-like-[Balearica-regulorum-gibbericeps]	XP_032631210.1-receptor-interacting-serine/threonine-protein-kinase-4-[Chelonoidis-abingdonii]	XP_016149449.1-PREDICTED:-ankyrin-repeat-and-protein-kinase-domain-containing-protein-1-like-[Sinocyclocheilus-grahami]	XP_031155379.1-caspase-2-isoform-X6-[Sander-lucioperca]	XP_050755886.1-caspase-8-like-isoform-X2-[Gymnogyps-californianus]	XP_036207870.1-caspase-9-isoform-X3-[Myotis-myotis]	XP_029561370.1-caspase-8-like-[Salmo-trutta]	XP_046927017.1-FAS-associated-death-domain-protein-[Lynx-rufus]	XP_009959824.1-PREDICTED:-TIR-domain-containing-adapter-molecule-1-[Leptosomus-discolor]	XP_029478259.1-nucleotide-binding-oligomerization-domain-containing-protein-1-like-[Oncorhynchus-nerka] (2)	XP_036922238.1-nucleotide-binding-oligomerization-domain-containing-protein-2-isoform-X2-[Sturnira-hondurensis] (2)	XP_043872754.1-interferon-regulatory-factor-6-[Solea-senegalensis]
XP_026798975.1-receptor-interacting-serine/threonine-protein-kinase-4-isoform-X1-[Pangasianodon-hypophthalmus]	XP_033042727.1-Z-DNA-binding-protein-1-isoform-X3-[Trachypithecus-francoisi] (2)	XP_014392231.1-PREDICTED:-mixed-lineage-kinase-domain-like-protein-isoform-X2-[Myotis-brandtii]	XP_048286109.1-receptor-interacting-serine/threonine-protein-kinase-1-[Myodes-glareolus]	XP_033914308.2-receptor-interacting-serine/threonine-protein-kinase-2-like-[Acipenser-ruthenus]	XP_021016015.1-receptor-interacting-serine/threonine-protein-kinase-2-isoform-X1-[Mus-caroli]	XP_032556801.1-receptor-interacting-serine/threonine-protein-kinase-2-like-[Chiroxiphia-lanceolata]	XP_018547961.1-LOW-QUALITY-PROTEIN:-receptor-interacting-serine/threonine-protein-kinase-4-[Lates-calcarifer]	XP_005069347.1-LOW-QUALITY-PROTEIN:-ankyrin-repeat-and-protein-kinase-domain-containing-protein-1-[Mesocricetus-auratus]	XP_042644788.1-caspase-2-isoform-X4-[Tyto-alba]	NP_001387595.1-caspase-8-isoform-12-[Homo-sapiens]	XP_015983871.2-caspase-9-[Rousettus-aegyptiacus]	XP_016042508.1-PREDICTED:-caspase-10-[Erinaceus-europaeus]	XP_008541803.1-PREDICTED:-FAS-associated-death-domain-protein,-partial-[Equus-przewalskii]	XP_021074167.2-TIR-domain-containing-adapter-molecule-1-[Mus-pahari]	XP_042165841.1-nucleotide-binding-oligomerization-domain-containing-protein-1-like-isoform-X1-[Oncorhynchus-tshawytscha]	XP_036922234.1-nucleotide-binding-oligomerization-domain-containing-protein-2-isoform-X1-[Sturnira-hondurensis]	XP_058488236.1-interferon-regulatory-factor-6-isoform-X2-[Solea-solea]
XP_045144072.1-receptor-interacting-serine/threonine-protein-kinase-3-[Echinops-telfairi]	XP_033042736.1-Z-DNA-binding-protein-1-isoform-X11-[Trachypithecus-francoisi] (2)	XP_014392230.1-PREDICTED:-mixed-lineage-kinase-domain-like-protein-isoform-X1-[Myotis-brandtii]	XP_029931318.1-receptor-interacting-serine/threonine-protein-kinase-1-[Myripristis-murdjan]	XP_050173479.1-receptor-interacting-serine/threonine-protein-kinase-2-[Myiozetetes-cayanensis]	XP_037360240.1-receptor-interacting-serine/threonine-protein-kinase-2-isoform-X1-[Talpa-occidentalis]	XP_005025777.2-receptor-interacting-serine/threonine-protein-kinase-2-isoform-X1-[Anas-platyrhynchos]	XP_051870968.1-receptor-interacting-serine/threonine-protein-kinase-4-[Pristis-pectinata]	XP_011541039.1-ankyrin-repeat-and-protein-kinase-domain-containing-protein-1-isoform-X3-[Homo-sapiens]	XP_052029527.1-caspase-2-isoform-X2-[Apodemus-sylvaticus]	XP_031457091.1-caspase-8-like-[Phasianus-colchicus]	XP_039698082.1-caspase-9-[Pteropus-giganteus]	XP_036276564.1-caspase-10-isoform-X1-[Pipistrellus-kuhlii]	XP_026233723.1-FAS-associated-death-domain-protein-[Anabas-testudineus]	XP_025052284.1-TIR-domain-containing-adapter-molecule-1-isoform-X1-[Alligator-sinensis]	XP_042165844.1-nucleotide-binding-oligomerization-domain-containing-protein-1-like-isoform-X2-[Oncorhynchus-tshawytscha] (2)	XP_036202004.1-nucleotide-binding-oligomerization-domain-containing-protein-2-isoform-X9-[Myotis-myotis] (2)	XP_035487307.2-interferon-regulatory-factor-6-[Scophthalmus-maximus]
XP_007545715.1-PREDICTED:-receptor-interacting-serine/threonine-protein-kinase-3-like-isoform-X2-[Poecilia-formosa]	XP_030771141.1-Z-DNA-binding-protein-1-isoform-X2-[Rhinopithecus-roxellana] (2)	XP_014392232.1-PREDICTED:-mixed-lineage-kinase-domain-like-protein-isoform-X3-[Myotis-brandtii]	XP_035746461.1-receptor-interacting-serine/threonine-protein-kinase-1-isoform-X2-[Egretta-garzetta]	XP_029498026.1-receptor-interacting-serine/threonine-protein-kinase-2-like-[Oncorhynchus-nerka]	XP_043921323.1-receptor-interacting-serine/threonine-protein-kinase-2-[Protopterus-annectens]	XP_029577785.1-receptor-interacting-serine/threonine-protein-kinase-2-like-isoform-X2-[Salmo-trutta]	XP_003464003.2-receptor-interacting-serine/threonine-protein-kinase-4-[Cavia-porcellus]	XP_045871931.1-LOW-QUALITY-PROTEIN:-ankyrin-repeat-and-protein-kinase-domain-containing-protein-1-[Meles-meles]	XP_029135692.1-caspase-2-isoform-X5-[Labrus-bergylta]	XP_025057993.1-caspase-8-like-[Alligator-sinensis]	XP_006914396.1-caspase-9-[Pteropus-alecto]	XP_036613794.1-caspase-10-[Trichosurus-vulpecula]	XP_009884596.1-PREDICTED:-FAS-associated-death-domain-protein-[Charadrius-vociferus]	XP_028856297.1-TIR-domain-containing-adapter-molecule-1-like-[Denticeps-clupeoides]	XP_052350534.1-nucleotide-binding-oligomerization-domain-containing-protein-1-like-isoform-X2-[Oncorhynchus-keta] (2)	XP_036201996.1-nucleotide-binding-oligomerization-domain-containing-protein-2-isoform-X2-[Myotis-myotis]	XP_019942637.1-PREDICTED:-interferon-regulatory-factor-6-[Paralichthys-olivaceus]
XP_037308489.1-receptor-interacting-serine/threonine-protein-kinase-3-like-isoform-X5-[Pungitius-pungitius]	XP_030771144.1-Z-DNA-binding-protein-1-isoform-X5-[Rhinopithecus-roxellana] (2)	XP_036202390.1-mixed-lineage-kinase-domain-like-protein-isoform-X2-[Myotis-myotis]	XP_021469174.2-receptor-interacting-serine/threonine-protein-kinase-1-[Oncorhynchus-mykiss]	XP_044074143.1-receptor-interacting-serine/threonine-protein-kinase-2-isoform-X1-[Siniperca-chuatsi]	XP_051243159.1-receptor-interacting-serine/threonine-protein-kinase-2-like-[Dicentrarchus-labrax]	XP_043937460.1-receptor-interacting-serine/threonine-protein-kinase-2-like-[Protopterus-annectens]	XP_045669457.1-receptor-interacting-serine/threonine-protein-kinase-4-[Ursus-americanus]	XP_036049998.1-ankyrin-repeat-and-protein-kinase-domain-containing-protein-1-isoform-X1-[Onychomys-torridus]	XP_022612364.1-caspase-2-isoform-X2-[Seriola-dumerili]	XP_009876853.1-PREDICTED:-caspase-8-[Apaloderma-vittatum]	XP_005607561.1-caspase-9-[Equus-caballus]	XP_026001343.1-caspase-8-like-isoform-X1-[Astatotilapia-calliptera]	XP_044922236.1-FAS-associated-death-domain-protein-isoform-X2-[Mustela-putorius-furo]	XP_022381312.1-TIR-domain-containing-adapter-molecule-1-[Enhydra-lutris-kenyoni]	XP_052350532.1-nucleotide-binding-oligomerization-domain-containing-protein-1-like-isoform-X1-[Oncorhynchus-keta] (2)	XP_036202002.1-nucleotide-binding-oligomerization-domain-containing-protein-2-isoform-X7-[Myotis-myotis] (2)	XP_060925465.1-interferon-regulatory-factor-6-[Limanda-limanda]
XP_031160124.1-receptor-interacting-serine/threonine-protein-kinase-3-isoform-X2-[Sander-lucioperca]	XP_030771145.1-Z-DNA-binding-protein-1-isoform-X8-[Rhinopithecus-roxellana] (2)	XP_036202388.1-mixed-lineage-kinase-domain-like-protein-isoform-X1-[Myotis-myotis]	XP_027032854.1-receptor-interacting-serine/threonine-protein-kinase-1-isoform-X1-[Tachysurus-fulvidraco]	XP_035269815.1-receptor-interacting-serine/threonine-protein-kinase-2-isoform-X1-[Anguilla-anguilla]	XP_048364609.1-receptor-interacting-serine/threonine-protein-kinase-2-isoform-X1-[Sphaerodactylus-townsendi]	XP_030368070.1-receptor-interacting-serine/threonine-protein-kinase-2-like-isoform-X1-[Strigops-habroptila]	XP_013911945.1-PREDICTED:-receptor-interacting-serine/threonine-protein-kinase-4-[Thamnophis-sirtalis]	XP_042595389.1-ankyrin-repeat-and-protein-kinase-domain-containing-protein-1-like-[Cyprinus-carpio]	XP_031155381.1-caspase-2-isoform-X8-[Sander-lucioperca]	XP_037253876.1-LOW-QUALITY-PROTEIN:-caspase-8-like-[Falco-rusticolus]	XP_046518703.1-caspase-9-[Equus-quagga]	XP_033025480.1-caspase-10-[Lacerta-agilis]	XP_025890541.1-FAS-associated-death-domain-protein-[Nothoprocta-perdicaria]	XP_010173154.1-TIR-domain-containing-adapter-molecule-1-[Antrostomus-carolinensis]	XP_038832640.1-nucleotide-binding-oligomerization-domain-containing-protein-1-like-[Salvelinus-namaycush]	XP_036201997.1-nucleotide-binding-oligomerization-domain-containing-protein-2-isoform-X3-[Myotis-myotis]	XP_034441954.1-interferon-regulatory-factor-6-isoform-X2-[Hippoglossus-hippoglossus]
XP_019115544.2-ankyrin-repeat-and-protein-kinase-domain-containing-protein-1-isoform-X1-[Larimichthys-crocea]	XP_030771140.1-Z-DNA-binding-protein-1-isoform-X1-[Rhinopithecus-roxellana] (2)	XP_006755827.1-PREDICTED:-mixed-lineage-kinase-domain-like-protein-isoform-X1-[Myotis-davidii]	XP_052504573.1-receptor-interacting-serine/threonine-protein-kinase-1-isoform-X2-[Budorcas-taxicolor]	XP_017723393.1-PREDICTED:-receptor-interacting-serine/threonine-protein-kinase-2-isoform-X1-[Rhinopithecus-bieti]	XP_039096521.1-receptor-interacting-serine/threonine-protein-kinase-2-isoform-X2-[Hyaena-hyaena]	XP_010151519.1-PREDICTED:-receptor-interacting-serine/threonine-protein-kinase-2-like-[Eurypyga-helias]	XP_037234122.1-receptor-interacting-serine/threonine-protein-kinase-4-[Falco-rusticolus]	XP_043115730.1-ankyrin-repeat-and-protein-kinase-domain-containing-protein-1-isoform-X1-[Puntigrus-tetrazona]	XP_040900180.1-caspase-2-isoform-X1-[Toxotes-jaculatrix]	XP_045415699.1-caspase-8-isoform-X1-[Lemur-catta]	XP_044625681.1-caspase-9-isoform-X1-[Equus-asinus]	XP_028924109.1-caspase-10-like-isoform-X2-[Ornithorhynchus-anatinus]	XP_005022835.1-FAS-associated-death-domain-protein-[Anas-platyrhynchos]	XP_048415795.1-TIR-domain-containing-adapter-molecule-1-[Stegostoma-tigrinum]	XP_023991919.1-nucleotide-binding-oligomerization-domain-containing-protein-1-like-isoform-X1-[Salvelinus-alpinus]	XP_059524059.1-LOW-QUALITY-PROTEIN:-nucleotide-binding-oligomerization-domain-containing-protein-2-[Myotis-daubentonii]	XP_034441953.1-interferon-regulatory-factor-6-isoform-X1-[Hippoglossus-hippoglossus]
XP_041429383.1-receptor-interacting-serine/threonine-protein-kinase-4-isoform-X7-[Xenopus-laevis]	XP_033042735.1-Z-DNA-binding-protein-1-isoform-X10-[Trachypithecus-francoisi] (2)	XP_006755829.1-PREDICTED:-mixed-lineage-kinase-domain-like-protein-isoform-X2-[Myotis-davidii]	XP_032870595.1-receptor-interacting-serine/threonine-protein-kinase-1-[Amblyraja-radiata]	XP_004767029.1-receptor-interacting-serine/threonine-protein-kinase-2-isoform-X1-[Mustela-putorius-furo]	XP_026654522.1-receptor-interacting-serine/threonine-protein-kinase-2-isoform-X1-[Zonotrichia-albicollis]	XP_049661480.1-LOW-QUALITY-PROTEIN:-receptor-interacting-serine/threonine-protein-kinase-2-like-[Accipiter-gentilis]	XP_026994189.2-receptor-interacting-serine/threonine-protein-kinase-4-isoform-X1-[Tachysurus-fulvidraco]	XP_034723823.1-ankyrin-repeat-and-protein-kinase-domain-containing-protein-1-[Etheostoma-cragini]	XP_030250904.1-caspase-2-isoform-X5-[Sparus-aurata]	NP_001219.2-caspase-8-isoform-1-precursor-[Homo-sapiens]	XP_014691718.2-caspase-9-isoform-X2-[Equus-asinus]	XP_038576474.1-caspase-8-[Micropterus-salmoides]	XP_032975836.1-FAS-associated-death-domain-protein-[Rhinolophus-ferrumequinum]	XP_045660280.1-TIR-domain-containing-adapter-molecule-1-[Ursus-americanus]	XP_055760820.1-nucleotide-binding-oligomerization-domain-containing-protein-1-like-isoform-X1-[Salvelinus-fontinalis]	XP_036201993.1-nucleotide-binding-oligomerization-domain-containing-protein-2-isoform-X1-[Myotis-myotis]	XP_053287472.1-interferon-regulatory-factor-6-isoform-X1-[Pleuronectes-platessa]
XP_025298575.1-receptor-interacting-serine/threonine-protein-kinase-3-isoform-X3-[Canis-lupus-dingo]	XP_033042733.1-Z-DNA-binding-protein-1-isoform-X8-[Trachypithecus-francoisi] (2)	XP_004690247.1-PREDICTED:-mixed-lineage-kinase-domain-like-protein-[Condylura-cristata]	XP_016415400.1-PREDICTED:-receptor-interacting-serine/threonine-protein-kinase-1-like-isoform-X3-[Sinocyclocheilus-rhinocerous]	XP_047444472.1-receptor-interacting-serine/threonine-protein-kinase-2-like-isoform-X1-[Mugil-cephalus]	XP_031802815.1-receptor-interacting-serine/threonine-protein-kinase-2-isoform-X2-[Sarcophilus-harrisii]	XP_034975313.1-receptor-interacting-serine/threonine-protein-kinase-2-like-[Zootoca-vivipara]	XP_004594227.1-receptor-interacting-serine/threonine-protein-kinase-4-[Ochotona-princeps]	XP_048196938.1-ankyrin-repeat-and-protein-kinase-domain-containing-protein-1-[Perognathus-longimembris-pacificus]	XP_048360461.1-caspase-2-isoform-X2-[Sphaerodactylus-townsendi]	XP_030342000.1-caspase-8-like-isoform-X1-[Strigops-habroptila]	XP_044625682.1-caspase-9-isoform-X3-[Equus-asinus]	XP_039210034.1-caspase-10-isoform-X3-[Crotalus-tigris]	XP_037854820.1-FAS-associated-death-domain-protein-[Chlorocebus-sabaeus]	XP_005587645.2-TIR-domain-containing-adapter-molecule-1-[Macaca-fascicularis]	XP_055760821.1-nucleotide-binding-oligomerization-domain-containing-protein-1-like-isoform-X2-[Salvelinus-fontinalis]	XP_036201999.1-nucleotide-binding-oligomerization-domain-containing-protein-2-isoform-X5-[Myotis-myotis]	XP_053287478.1-interferon-regulatory-factor-6-isoform-X2-[Pleuronectes-platessa]
XP_032773980.1-receptor-interacting-serine/threonine-protein-kinase-3-[Rattus-rattus]	XP_030771143.1-Z-DNA-binding-protein-1-isoform-X4-[Rhinopithecus-roxellana] (2)	XP_027629306.1-mixed-lineage-kinase-domain-like-protein-isoform-X4-[Tupaia-chinensis]	XP_051553497.1-receptor-interacting-serine/threonine-protein-kinase-1-isoform-X2-[Myxocyprinus-asiaticus]	XP_030368070.1-receptor-interacting-serine/threonine-protein-kinase-2-like-isoform-X1-[Strigops-habroptila]	XP_041697556.2-receptor-interacting-serine/threonine-protein-kinase-2-like-[Coregonus-clupeaformis]	XP_009911583.1-PREDICTED:-LOW-QUALITY-PROTEIN:-receptor-interacting-serine/threonine-protein-kinase-2-like-[Haliaeetus-albicilla]	XP_005992827.1-PREDICTED:-receptor-interacting-serine/threonine-protein-kinase-4-[Latimeria-chalumnae]	XP_031605774.1-ankyrin-repeat-and-protein-kinase-domain-containing-protein-1-[Oreochromis-aureus]	XP_053351302.1-caspase-2-isoform-X1-[Clarias-gariepinus]	XP_030342001.1-caspase-8-like-isoform-X2-[Strigops-habroptila]	XP_014639373.1-PREDICTED:-caspase-9-isoform-X1-[Ceratotherium-simum-simum]	XP_042281352.1-caspase-8-[Thunnus-maccoyii]	XP_038125139.1-protein-FADD-[Cyprinodon-tularosa]	XP_007109377.1-TIR-domain-containing-adapter-molecule-1-[Physeter-catodon]	XP_023991917.1-nucleotide-binding-oligomerization-domain-containing-protein-1-like-isoform-X1-[Salvelinus-alpinus] (2)	XP_036201998.1-nucleotide-binding-oligomerization-domain-containing-protein-2-isoform-X4-[Myotis-myotis] (2)	XP_062257298.1-interferon-regulatory-factor-6-[Platichthys-flesus]
XP_044130768.1-receptor-interacting-serine/threonine-protein-kinase-3-[Bufo-gargarizans]	XP_023087705.1-Z-DNA-binding-protein-1-isoform-X8-[Piliocolobus-tephrosceles] (2)	XP_006152702.1-mixed-lineage-kinase-domain-like-protein-isoform-X1-[Tupaia-chinensis]	XP_033790736.1-receptor-interacting-serine/threonine-protein-kinase-1-isoform-X1-[Geotrypetes-seraphini]	XP_003975835.1-receptor-interacting-serine/threonine-protein-kinase-2-isoform-X1-[Takifugu-rubripes]	XP_021468524.2-receptor-interacting-serine/threonine-protein-kinase-2-[Oncorhynchus-mykiss]	XP_028907758.1-receptor-interacting-serine/threonine-protein-kinase-2-like-[Ornithorhynchus-anatinus]	XP_004842513.1-receptor-interacting-serine/threonine-protein-kinase-4-[Heterocephalus-glaber]	XP_010171747.1-ankyrin-repeat-and-protein-kinase-domain-containing-protein-1-[Antrostomus-carolinensis]	XP_029090306.1-caspase-2-isoform-X1-[Monodon-monoceros]	XP_015287549.1-PREDICTED:-caspase-8-isoform-X2-[Macaca-fascicularis]	XP_014639374.1-PREDICTED:-caspase-9-isoform-X2-[Ceratotherium-simum-simum]	XP_006272601.1-PREDICTED:-caspase-10-isoform-X1-[Alligator-mississippiensis]	XP_025771231.1-FAS-associated-death-domain-protein,-partial-[Puma-concolor]	XP_058616482.1-TIR-domain-containing-adapter-molecule-1-[Onychostoma-macrolepis]	XP_023991918.1-nucleotide-binding-oligomerization-domain-containing-protein-1-like-isoform-X2-[Salvelinus-alpinus]	XP_036202000.1-nucleotide-binding-oligomerization-domain-containing-protein-2-isoform-X6-[Myotis-myotis] (2)	XP_020463570.1-interferon-regulatory-factor-6-[Monopterus-albus]
XP_043914203.1-receptor-interacting-serine/threonine-protein-kinase-2-like-[Protopterus-annectens]	XP_017707653.1-PREDICTED:-Z-DNA-binding-protein-1-isoform-X4-[Rhinopithecus-bieti] (2)	XP_006152703.1-mixed-lineage-kinase-domain-like-protein-isoform-X2-[Tupaia-chinensis]	XP_032654277.1-receptor-interacting-serine/threonine-protein-kinase-1-isoform-X4-[Chelonoidis-abingdonii]	XP_010860529.1-PREDICTED:-receptor-interacting-serine/threonine-protein-kinase-2,-partial-[Bison-bison-bison]	XP_023865011.1-receptor-interacting-serine/threonine-protein-kinase-2-isoform-X1-[Salvelinus-alpinus]	XP_009511302.1-PREDICTED:-receptor-interacting-serine/threonine-protein-kinase-2-like-[Phalacrocorax-carbo]	XP_028608381.1-receptor-interacting-serine/threonine-protein-kinase-4-[Grammomys-surdaster]	XP_010573403.1-PREDICTED:-ankyrin-repeat-and-protein-kinase-domain-containing-protein-1-[Haliaeetus-leucocephalus]	XP_052494585.1-caspase-2-isoform-X1-[Budorcas-taxicolor]	XP_025905587.1-caspase-8-like-isoform-X2-[Nothoprocta-perdicaria]	XP_025780895.1-caspase-9-[Puma-concolor]	XP_024271953.1-caspase-8-like-isoform-X1-[Oncorhynchus-tshawytscha]	XP_033909071.2-FAS-associated-death-domain-protein-[Acipenser-ruthenus]	XP_014460416.2-TIR-domain-containing-adapter-molecule-1-[Alligator-mississippiensis]	XP_038832960.1-nucleotide-binding-oligomerization-domain-containing-protein-1-like-[Salvelinus-namaycush]	XP_023602616.1-nucleotide-binding-oligomerization-domain-containing-protein-2-isoform-X4-[Myotis-lucifugus]	XP_061583076.1-interferon-regulatory-factor-6-[Cololabis-saira]
XP_016850868.1-PREDICTED:-receptor-interacting-serine/threonine-protein-kinase-3-isoform-X2-[Anolis-carolinensis]	XP_017707654.1-PREDICTED:-Z-DNA-binding-protein-1-isoform-X5-[Rhinopithecus-bieti] (2)	XP_007527656.1-PREDICTED:-mixed-lineage-kinase-domain-like-protein-[Erinaceus-europaeus]	XP_039198427.1-receptor-interacting-serine/threonine-protein-kinase-1-isoform-X2-[Crotalus-tigris]	XP_007554907.1-PREDICTED:-receptor-interacting-serine/threonine-protein-kinase-2-isoform-X2-[Poecilia-formosa]	XP_038665027.1-receptor-interacting-serine/threonine-protein-kinase-2-[Scyliorhinus-canicula]	XP_016156742.1-PREDICTED:-receptor-interacting-serine/threonine-protein-kinase-2-like-[Ficedula-albicollis]	XP_038846087.1-receptor-interacting-serine/threonine-protein-kinase-4-like-isoform-X1-[Salvelinus-namaycush]	XP_041890174.1-ankyrin-repeat-and-protein-kinase-domain-containing-protein-1-[Corvus-kubaryi]	XP_029694628.1-caspase-2-[Takifugu-rubripes]	NP_001233725.1-caspase-8-[Cricetulus-griseus]	XP_040317908.1-caspase-9-isoform-X1-[Puma-yagouaroundi]	XP_011716385.1-caspase-10-isoform-X1-[Macaca-nemestrina]	XP_029702371.1-FAS-associated-death-domain-protein-[Takifugu-rubripes]	XP_032482023.1-TIR-domain-containing-adapter-molecule-1-[Phocoena-sinus]	XP_055759648.1-nucleotide-binding-oligomerization-domain-containing-protein-1-like-[Salvelinus-fontinalis] (2)	XP_023602615.1-nucleotide-binding-oligomerization-domain-containing-protein-2-isoform-X2-[Myotis-lucifugus]	XP_026163839.1-interferon-regulatory-factor-6-[Mastacembelus-armatus]
XP_036968133.1-receptor-interacting-serine/threonine-protein-kinase-3-isoform-X1-[Acanthopagrus-latus]	XP_011527360.1-Z-DNA-binding-protein-1-isoform-X1-[Homo-sapiens] (2)	XP_057348755.1-mixed-lineage-kinase-domain-like-protein-[Manis-pentadactyla]	XP_026006455.1-receptor-interacting-serine/threonine-protein-kinase-1-isoform-X1-[Astatotilapia-calliptera]	XP_038825868.1-receptor-interacting-serine/threonine-protein-kinase-2-like-isoform-X1-[Salvelinus-namaycush]	XP_034770649.1-receptor-interacting-serine/threonine-protein-kinase-2-like-[Acipenser-ruthenus]	XP_015745333.2-receptor-interacting-serine/threonine-protein-kinase-2-like-[Python-bivittatus]	XP_026948326.1-receptor-interacting-serine/threonine-protein-kinase-4-isoform-X2-[Lagenorhynchus-obliquidens]	XP_047449235.1-ankyrin-repeat-and-protein-kinase-domain-containing-protein-1-[Mugil-cephalus]	XP_037129211.1-caspase-2-isoform-X1-[Syngnathus-acus]	XP_009641849.1-caspase-8-isoform-X1-[Egretta-garzetta]	XP_043429762.1-caspase-9-isoform-X1-[Prionailurus-bengalensis]	XP_043916404.1-caspase-8-like-isoform-X2-[Protopterus-annectens]	XP_015719192.1-FAS-associated-death-domain-protein-[Coturnix-japonica]	XP_058918032.1-TIR-domain-containing-adapter-molecule-1-[Kogia-breviceps]	XP_034554051.1-nucleotide-binding-oligomerization-domain-containing-protein-1-[Notolabrus-celidotus] (2)	XP_014303494.1-nucleotide-binding-oligomerization-domain-containing-protein-2-isoform-X3-[Myotis-lucifugus]	XP_040890367.1-interferon-regulatory-factor-6-[Toxotes-jaculatrix]
XP_049468955.1-receptor-interacting-serine/threonine-protein-kinase-3-isoform-X1-[Panthera-uncia]	XP_054180057.1-Z-DNA-binding-protein-1-isoform-X1-[Homo-sapiens] (2)	XP_036849775.1-mixed-lineage-kinase-domain-like-protein-isoform-X1-[Manis-javanica]	XP_043446871.1-receptor-interacting-serine/threonine-protein-kinase-1-[Prionailurus-bengalensis]	XP_030368072.1-receptor-interacting-serine/threonine-protein-kinase-2-like-isoform-X2-[Strigops-habroptila]	XP_027748294.1-receptor-interacting-serine/threonine-protein-kinase-2-isoform-X2-[Empidonax-traillii]	XP_025898937.1-receptor-interacting-serine/threonine-protein-kinase-2-like-[Nothoprocta-perdicaria]	XP_040842575.1-receptor-interacting-serine/threonine-protein-kinase-4-[Ochotona-curzoniae]	XP_045338797.1-ankyrin-repeat-and-protein-kinase-domain-containing-protein-1-isoform-X1-[Leopardus-geoffroyi]	XP_023795344.1-caspase-2-isoform-X1-[Cyanistes-caeruleus]	XP_031814206.1-caspase-8-[Sarcophilus-harrisii]	XP_011282894.1-caspase-9-isoform-X1-[Felis-catus]	XP_043988263.1-caspase-8-isoform-X1-[Gambusia-affinis]	XP_026124288.1-FAS-associated-death-domain-protein-[Carassius-auratus]	XP_032250328.1-TIR-domain-containing-adapter-molecule-1-[Phoca-vitulina]	XP_041649178.1-nucleotide-binding-oligomerization-domain-containing-protein-1-isoform-X1-[Cheilinus-undulatus]	XP_014303493.1-nucleotide-binding-oligomerization-domain-containing-protein-2-isoform-X1-[Myotis-lucifugus]	XP_029357776.1-interferon-regulatory-factor-6-[Echeneis-naucrates]
XP_043351894.1-receptor-interacting-serine/threonine-protein-kinase-3-isoform-X2-[Dermochelys-coriacea]	NP_001310895.1-Z-DNA-binding-protein-1-isoform-e-[Homo-sapiens] (2)	XP_036849776.1-mixed-lineage-kinase-domain-like-protein-isoform-X2-[Manis-javanica]	XP_042284023.1-receptor-interacting-serine/threonine-protein-kinase-1-[Thunnus-maccoyii]	XP_044290140.1-receptor-interacting-serine/threonine-protein-kinase-2-like-[Varanus-komodoensis]	XP_043833801.1-receptor-interacting-serine/threonine-protein-kinase-2-isoform-X1-[Dromiciops-gliroides]	XP_034644476.1-receptor-interacting-serine/threonine-protein-kinase-2-like-[Trachemys-scripta-elegans]	XP_040908064.1-receptor-interacting-serine/threonine-protein-kinase-4-[Toxotes-jaculatrix]	XP_015739281.1-LOW-QUALITY-PROTEIN:-ankyrin-repeat-and-protein-kinase-domain-containing-protein-1-[Coturnix-japonica]	XP_004860553.1-caspase-2-isoform-X1-[Heterocephalus-glaber]	XP_010296001.1-PREDICTED:-caspase-8-like-[Balearica-regulorum-gibbericeps]	XP_044891066.1-caspase-9-isoform-X4-[Felis-catus]	XP_034042578.1-caspase-8-isoform-X2-[Thalassophryne-amazonica]	XP_038261683.1-FAS-associated-death-domain-protein-[Dermochelys-coriacea]	XP_034039522.1-TIR-domain-containing-adapter-molecule-1-isoform-X1-[Thalassophryne-amazonica]	XP_041649181.1-nucleotide-binding-oligomerization-domain-containing-protein-1-isoform-X2-[Cheilinus-undulatus]	XP_004664908.2-nucleotide-binding-oligomerization-domain-containing-protein-2-[Jaculus-jaculus] (2)	XP_039971603.1-interferon-regulatory-factor-6-[Xiphias-gladius]
XP_045306512.1-receptor-interacting-serine/threonine-protein-kinase-3-isoform-X2-[Leopardus-geoffroyi]	NP_001153891.1-Z-DNA-binding-protein-1-isoform-d-[Homo-sapiens] (2)	XP_014648168.1-PREDICTED:-mixed-lineage-kinase-domain-like-protein-isoform-X1-[Ceratotherium-simum-simum]	XP_051655028.1-receptor-interacting-serine/threonine-protein-kinase-1-[Manacus-candei]	XP_035399334.1-receptor-interacting-serine/threonine-protein-kinase-2-like-[Cygnus-atratus]	XP_050827805.1-receptor-interacting-serine/threonine-protein-kinase-2-isoform-X3-[Serinus-canaria]	XP_014030677.1-receptor-interacting-serine/threonine-protein-kinase-2-like-isoform-X1-[Salmo-salar]	XP_007493126.1-PREDICTED:-receptor-interacting-serine/threonine-protein-kinase-4-isoform-X1-[Monodelphis-domestica]	XP_039619935.1-ankyrin-repeat-and-protein-kinase-domain-containing-protein-1-[Polypterus-senegalus]	XP_038005479.1-caspase-2-[Motacilla-alba-alba]	XP_006190009.1-caspase-8-[Camelus-ferus]	XP_019691791.2-caspase-9-isoform-X3-[Felis-catus]	XP_010147131.1-PREDICTED:-caspase-10-like-[Eurypyga-helias]	XP_010747653.1-FAS-associated-death-domain-protein-[Larimichthys-crocea]	XP_009095163.3-TIR-domain-containing-adapter-molecule-1-[Serinus-canaria]	XP_060905624.1-nucleotide-binding-oligomerization-domain-containing-protein-1-[Labrus-mixtus] (2)	XP_008826533.1-nucleotide-binding-oligomerization-domain-containing-protein-2-[Nannospalax-galili]	XP_018536851.1-LOW-QUALITY-PROTEIN:-interferon-regulatory-factor-6-[Lates-calcarifer]
XP_019518577.1-PREDICTED:-receptor-interacting-serine/threonine-protein-kinase-3-isoform-X2-[Hipposideros-armiger]	XP_029774079.1-Z-DNA-binding-protein-1-isoform-X1-[Suricata-suricatta] (2)	XP_046536380.1-mixed-lineage-kinase-domain-like-protein-[Equus-quagga]	XP_011938836.1-PREDICTED:-receptor-interacting-serine/threonine-protein-kinase-1-isoform-X3-[Cercocebus-atys]	XP_036939001.1-receptor-interacting-serine/threonine-protein-kinase-2-like-isoform-X2-[Acanthopagrus-latus]	XP_051985102.1-receptor-interacting-serine/threonine-protein-kinase-2-like-isoform-X1-[Xyrauchen-texanus]	XP_044843692.1-receptor-interacting-serine/threonine-protein-kinase-2-like-isoform-X1-[Mauremys-mutica]	XP_015196642.1-PREDICTED:-receptor-interacting-serine/threonine-protein-kinase-4-[Lepisosteus-oculatus]	XP_031200239.1-ankyrin-repeat-and-protein-kinase-domain-containing-protein-1-isoform-X2-[Mastomys-coucha]	XP_043445717.1-caspase-2-isoform-X2-[Prionailurus-bengalensis]	XP_019794699.1-caspase-8-isoform-X2-[Tursiops-truncatus]	XP_019317011.2-caspase-9-isoform-X3-[Panthera-pardus]	XP_005573964.1-PREDICTED:-caspase-10-[Macaca-fascicularis]	XP_026867513.2-FAS-associated-death-domain-protein-isoform-X1-[Electrophorus-electricus]	XP_061094692.1-TIR-domain-containing-adapter-molecule-1-[Conger-conger]	XP_020492680.1-nucleotide-binding-oligomerization-domain-containing-protein-1-isoform-X1-[Labrus-bergylta]	XP_040591243.1-nucleotide-binding-oligomerization-domain-containing-protein-2-isoform-X2-[Mesocricetus-auratus] (2)	XP_022601370.1-interferon-regulatory-factor-6-[Seriola-dumerili]
XP_006903328.1-PREDICTED:-receptor-interacting-serine/threonine-protein-kinase-3-[Elephantulus-edwardii]	XP_029774080.1-Z-DNA-binding-protein-1-isoform-X2-[Suricata-suricatta] (2)	XP_005608486.1-mixed-lineage-kinase-domain-like-protein-isoform-X2-[Equus-caballus]	XP_020832318.1-receptor-interacting-serine/threonine-protein-kinase-1-isoform-X4-[Phascolarctos-cinereus]	XP_032556801.1-receptor-interacting-serine/threonine-protein-kinase-2-like-[Chiroxiphia-lanceolata]	XP_018532737.1-receptor-interacting-serine/threonine-protein-kinase-2-isoform-X2-[Lates-calcarifer]	XP_050760228.1-receptor-interacting-serine/threonine-protein-kinase-2-like-isoform-X2-[Gymnogyps-californianus]	XP_047234610.1-receptor-interacting-serine/threonine-protein-kinase-4-[Girardinichthys-multiradiatus]	XP_015193198.1-PREDICTED:-ankyrin-repeat-and-protein-kinase-domain-containing-protein-1-[Lepisosteus-oculatus]	XP_017591996.1-PREDICTED:-caspase-2-isoform-X2-[Corvus-brachyrhynchos]	XP_022349081.1-caspase-8-isoform-X3-[Enhydra-lutris-kenyoni]	XP_045331706.1-caspase-9-isoform-X3-[Leopardus-geoffroyi]	XP_030199249.1-caspase-8-like-isoform-X3-[Gadus-morhua]	XP_043825759.1-FAS-associated-death-domain-protein-[Dromiciops-gliroides]	XP_003919632.3-TIR-domain-containing-adapter-molecule-1-[Papio-anubis]	XP_040020013.1-nucleotide-binding-oligomerization-domain-containing-protein-1-isoform-X1-[Gasterosteus-aculeatus-aculeatus]	XP_040591242.1-nucleotide-binding-oligomerization-domain-containing-protein-2-isoform-X1-[Mesocricetus-auratus]	XP_056220769.1-interferon-regulatory-factor-6-[Seriola-aureovittata]
XP_014941704.1-receptor-interacting-serine/threonine-protein-kinase-3-isoform-X3-[Acinonyx-jubatus]	XP_039092851.1-Z-DNA-binding-protein-1-isoform-X2-[Hyaena-hyaena] (2)	XP_008532329.1-PREDICTED:-mixed-lineage-kinase-domain-like-protein-isoform-X1-[Equus-przewalskii]	XP_013995668.1-receptor-interacting-serine/threonine-protein-kinase-1-isoform-X2-[Salmo-salar]	XP_030629103.1-receptor-interacting-serine/threonine-protein-kinase-2-[Chanos-chanos]	XP_031759989.1-receptor-interacting-serine/threonine-protein-kinase-2-isoform-X2-[Xenopus-tropicalis]	XP_037265316.1-receptor-interacting-serine/threonine-protein-kinase-2-like-isoform-X1-[Falco-rusticolus]	XP_027443470.1-receptor-interacting-serine/threonine-protein-kinase-4-[Zalophus-californianus]	XP_037592576.1-ankyrin-repeat-and-protein-kinase-domain-containing-protein-1-isoform-X1-[Cebus-imitator]	XP_053156402.1-caspase-2-isoform-X2-[Hemicordylus-capensis]	XP_016042519.1-PREDICTED:-caspase-8-[Erinaceus-europaeus]	XP_026916149.1-caspase-9-isoform-X3-[Acinonyx-jubatus]	XP_053900735.1-caspase-10-like-[Malaclemys-terrapin-pileata]	XP_016851606.1-PREDICTED:-FAS-associated-death-domain-protein-[Anolis-carolinensis]	XP_041805159.1-TIR-domain-containing-adapter-molecule-1-[Chelmon-rostratus]	XP_033971516.1-nucleotide-binding-oligomerization-domain-containing-protein-1-[Trematomus-bernacchii] (2)	XP_051051049.1-nucleotide-binding-oligomerization-domain-containing-protein-2-[Phodopus-roborovskii] (2)	XP_047439992.1-interferon-regulatory-factor-6-[Mugil-cephalus]
XP_021454682.2-receptor-interacting-serine/threonine-protein-kinase-3-isoform-X1-[Oncorhynchus-mykiss]	XP_039092850.1-Z-DNA-binding-protein-1-isoform-X1-[Hyaena-hyaena] (2)	XP_014705578.1-mixed-lineage-kinase-domain-like-protein-isoform-X2-[Equus-asinus]	XP_028909871.1-receptor-interacting-serine/threonine-protein-kinase-1-isoform-X2-[Ornithorhynchus-anatinus]	XP_031802815.1-receptor-interacting-serine/threonine-protein-kinase-2-isoform-X2-[Sarcophilus-harrisii]	XP_007644116.3-receptor-interacting-serine/threonine-protein-kinase-2-isoform-X1-[Cricetulus-griseus]	XP_015495268.1-receptor-interacting-serine/threonine-protein-kinase-2-like-isoform-X1-[Parus-major]	XP_030918010.1-LOW-QUALITY-PROTEIN:-receptor-interacting-serine/threonine-protein-kinase-4-[Geospiza-fortis]	XP_009272712.1-PREDICTED:-LOW-QUALITY-PROTEIN:-ankyrin-repeat-and-protein-kinase-domain-containing-protein-1-[Aptenodytes-forsteri]	XP_056619072.1-caspase-2-isoform-X3-[Triplophysa-dalaica]	XP_030435589.1-caspase-8-like-isoform-X1-[Gopherus-evgoodei]	XP_040317917.1-caspase-9-isoform-X2-[Puma-yagouaroundi]	XP_038574565.1-caspase-8-like-[Micropterus-salmoides]	XP_010083668.1-PREDICTED:-LOW-QUALITY-PROTEIN:-FAS-associated-death-domain-protein-[Pterocles-gutturalis]	XP_044990546.1-TIR-domain-containing-adapter-molecule-1-isoform-X2-[Jaculus-jaculus]	XP_034073101.1-LOW-QUALITY-PROTEIN:-nucleotide-binding-oligomerization-domain-containing-protein-1-[Gymnodraco-acuticeps]	XP_027261346.1-nucleotide-binding-oligomerization-domain-containing-protein-2-isoform-X3-[Cricetulus-griseus]	XP_042263457.1-interferon-regulatory-factor-6-[Thunnus-maccoyii]
XP_047652467.1-receptor-interacting-serine/threonine-protein-kinase-3-like-isoform-X1-[Phacochoerus-africanus]	XP_043409544.1-Z-DNA-binding-protein-1-isoform-X2-[Prionailurus-bengalensis] (2)	XP_014705498.1-mixed-lineage-kinase-domain-like-protein-isoform-X1-[Equus-asinus]	XP_029971692.1-receptor-interacting-serine/threonine-protein-kinase-1-isoform-X1-[Salarias-fasciatus]	XP_027502800.1-receptor-interacting-serine/threonine-protein-kinase-2-like-[Corapipo-altera]	XP_004078988.1-receptor-interacting-serine/threonine-protein-kinase-2-[Oryzias-latipes]	XP_041256761.1-receptor-interacting-serine/threonine-protein-kinase-2-like-[Onychostruthus-taczanowskii]	XP_016076448.1-PREDICTED:-receptor-interacting-serine/threonine-protein-kinase-4-[Miniopterus-natalensis]	XP_038154473.1-ankyrin-repeat-and-protein-kinase-domain-containing-protein-1-isoform-X1-[Cyprinodon-tularosa]	XP_021148386.1-caspase-2-isoform-X3-[Columba-livia]	XP_019582349.1-PREDICTED:-caspase-8-[Rhinolophus-sinicus]	XP_019691790.1-caspase-9-isoform-X2-[Felis-catus]	XP_024245558.1-caspase-8-isoform-X2-[Oncorhynchus-tshawytscha]	XP_047402598.1-caspase-10-isoform-X5-[Sciurus-carolinensis]	XP_043391566.1-TIR-domain-containing-adapter-molecule-1-[Chelonia-mydas]	XP_033958284.1-nucleotide-binding-oligomerization-domain-containing-protein-1-isoform-X1-[Pseudochaenichthys-georgianus]	XP_003499558.1-nucleotide-binding-oligomerization-domain-containing-protein-2-isoform-X2-[Cricetulus-griseus] (2)	XP_044203883.1-interferon-regulatory-factor-6-[Thunnus-albacares]
XP_019284828.1-PREDICTED:-receptor-interacting-serine/threonine-protein-kinase-3-isoform-X2-[Panthera-pardus]	XP_043409543.1-Z-DNA-binding-protein-1-isoform-X1-[Prionailurus-bengalensis] (2)	XP_008065929.1-mixed-lineage-kinase-domain-like-protein-[Carlito-syrichta]	XP_016388309.1-PREDICTED:-receptor-interacting-serine/threonine-protein-kinase-1-like-isoform-X2-[Sinocyclocheilus-rhinocerous]	XP_024274434.2-receptor-interacting-serine/threonine-protein-kinase-2-[Oncorhynchus-tshawytscha]	XP_003975835.1-receptor-interacting-serine/threonine-protein-kinase-2-isoform-X1-[Takifugu-rubripes]	XP_018770155.2-receptor-interacting-serine/threonine-protein-kinase-2-like-isoform-X2-[Serinus-canaria]	XP_009430710.1-receptor-interacting-serine/threonine-protein-kinase-4-isoform-X2-[Pan-troglodytes]	XP_046493607.1-ankyrin-repeat-and-protein-kinase-domain-containing-protein-1-isoform-X3-[Equus-quagga]	XP_025900252.1-caspase-2-[Nothoprocta-perdicaria]	XP_032494184.1-caspase-8-isoform-X1-[Phocoena-sinus]	XP_053063427.1-caspase-9-isoform-X2-[Acinonyx-jubatus]	XP_038277516.1-caspase-10-like-[Dermochelys-coriacea]	XP_057696068.1-protein-FADD-isoform-X3-[Corythoichthys-intestinalis]	XP_059244689.1-TIR-domain-containing-adapter-molecule-1-[Mustela-nigripes]	XP_042346744.1-LOW-QUALITY-PROTEIN:-nucleotide-binding-oligomerization-domain-containing-protein-1-[Plectropomus-leopardus] (2)	XP_027261348.1-nucleotide-binding-oligomerization-domain-containing-protein-2-isoform-X5-[Cricetulus-griseus] (2)	XP_062272576.1-interferon-regulatory-factor-6-[Scomber-scombrus]
XP_027893746.1-receptor-interacting-serine/threonine-protein-kinase-3-like-isoform-X2-[Xiphophorus-couchianus]	XP_045300094.1-Z-DNA-binding-protein-1-isoform-X4-[Leopardus-geoffroyi] (2)	XP_004584250.1-mixed-lineage-kinase-domain-like-protein-[Ochotona-princeps]	XP_012427022.4-receptor-interacting-serine/threonine-protein-kinase-1-[Taeniopygia-guttata]	XP_045545015.1-receptor-interacting-serine/threonine-protein-kinase-2-isoform-X1-[Salmo-salar]	XP_006157611.1-receptor-interacting-serine/threonine-protein-kinase-2-isoform-X2-[Tupaia-chinensis]	XP_035592317.1-receptor-interacting-serine/threonine-protein-kinase-2-like-isoform-X1-[Oncorhynchus-keta]	XP_008143912.1-receptor-interacting-serine/threonine-protein-kinase-4-isoform-X1-[Eptesicus-fuscus]	XP_033953788.1-ankyrin-repeat-and-protein-kinase-domain-containing-protein-1-[Pseudochaenichthys-georgianus]	XP_054940655.1-caspase-2-isoform-X3-[Physeter-catodon]	XP_027316831.1-caspase-8-isoform-X1-[Anas-platyrhynchos]	XP_019317010.2-caspase-9-isoform-X2-[Panthera-pardus]	XP_015233513.1-PREDICTED:-caspase-8-like-[Cyprinodon-variegatus]	XP_052568096.1-FAS-associated-death-domain-protein-isoform-X1-[Peromyscus-californicus-insignis]	XP_005504021.1-TIR-domain-containing-adapter-molecule-1-isoform-X1-[Columba-livia]	XP_029308107.1-nucleotide-binding-oligomerization-domain-containing-protein-1-isoform-X1-[Cottoperca-gobio]	XP_007638450.1-nucleotide-binding-oligomerization-domain-containing-protein-2-isoform-X1-[Cricetulus-griseus]	XP_053171907.1-interferon-regulatory-factor-6-isoform-X1-[Scomber-japonicus]
XP_044841084.1-receptor-interacting-serine/threonine-protein-kinase-3-isoform-X2-[Mauremys-mutica]	XP_045300093.1-Z-DNA-binding-protein-1-isoform-X3-[Leopardus-geoffroyi] (2)	XP_040838305.1-mixed-lineage-kinase-domain-like-protein-[Ochotona-curzoniae]	XP_004628516.1-receptor-interacting-serine/threonine-protein-kinase-1-[Octodon-degus]	XP_031665595.1-receptor-interacting-serine/threonine-protein-kinase-2-isoform-X2-[Oncorhynchus-kisutch]	XP_039610225.1-receptor-interacting-serine/threonine-protein-kinase-2-[Polypterus-senegalus]	XP_020333356.2-receptor-interacting-serine/threonine-protein-kinase-2-isoform-X2-[Oncorhynchus-kisutch]	XP_019750837.1-PREDICTED:-receptor-interacting-serine/threonine-protein-kinase-4-[Hippocampus-comes]	XP_012931996.1-ankyrin-repeat-and-protein-kinase-domain-containing-protein-1-[Heterocephalus-glaber]	XP_004860554.1-caspase-2-isoform-X2-[Heterocephalus-glaber]	XP_025790859.1-caspase-8-[Puma-concolor]	XP_045331705.1-caspase-9-isoform-X2-[Leopardus-geoffroyi]	XP_008431285.1-PREDICTED:-caspase-8-like-[Poecilia-reticulata]	XP_047402599.1-caspase-10-isoform-X6-[Sciurus-carolinensis]	XP_042651036.1-TIR-domain-containing-adapter-molecule-1-isoform-X2-[Tyto-alba]	XP_031178671.1-nucleotide-binding-oligomerization-domain-containing-protein-1-isoform-X1-[Sander-lucioperca]	XP_027261350.1-nucleotide-binding-oligomerization-domain-containing-protein-2-isoform-X7-[Cricetulus-griseus]	XP_053171908.1-interferon-regulatory-factor-6-isoform-X2-[Scomber-japonicus]
XP_046237441.1-receptor-interacting-serine/threonine-protein-kinase-3-[Scatophagus-argus]	XP_045300092.1-Z-DNA-binding-protein-1-isoform-X2-[Leopardus-geoffroyi] (2)	XP_020035251.1-mixed-lineage-kinase-domain-like-protein-isoform-X1-[Castor-canadensis]	XP_029560980.1-receptor-interacting-serine/threonine-protein-kinase-1-[Salmo-trutta]	XP_020661398.1-receptor-interacting-serine/threonine-protein-kinase-2-like-isoform-X1-[Pogona-vitticeps]	XP_011792465.1-PREDICTED:-receptor-interacting-serine/threonine-protein-kinase-2-[Colobus-angolensis-palliatus]	XP_030437885.1-receptor-interacting-serine/threonine-protein-kinase-2-like-isoform-X2-[Gopherus-evgoodei]	XP_038565037.1-receptor-interacting-serine/threonine-protein-kinase-4-[Micropterus-salmoides]	XP_016379436.1-PREDICTED:-ankyrin-repeat-and-protein-kinase-domain-containing-protein-1-like-[Sinocyclocheilus-rhinocerous]	XP_044216080.1-caspase-2-isoform-X6-[Thunnus-albacares]	XP_052513673.1-caspase-8-[Budorcas-taxicolor]	XP_026916147.1-caspase-9-isoform-X1-[Acinonyx-jubatus]	XP_027878435.1-caspase-8-like-isoform-X2-[Xiphophorus-couchianus]	XP_026786160.1-protein-FADD-[Pangasianodon-hypophthalmus]	XP_023261679.1-TIR-domain-containing-adapter-molecule-1-like-[Seriola-lalandi-dorsalis]	XP_035862688.1-nucleotide-binding-oligomerization-domain-containing-protein-1-isoform-X2-[Sander-lucioperca] (2)	XP_027261347.1-nucleotide-binding-oligomerization-domain-containing-protein-2-isoform-X4-[Cricetulus-griseus]	XP_034539091.1-interferon-regulatory-factor-6-[Notolabrus-celidotus]
XP_045658606.1-receptor-interacting-serine/threonine-protein-kinase-3-isoform-X1-[Ursus-americanus]	XP_045300091.1-Z-DNA-binding-protein-1-isoform-X1-[Leopardus-geoffroyi] (2)	XP_020035252.1-mixed-lineage-kinase-domain-like-protein-isoform-X2-[Castor-canadensis]	XP_034410888.1-receptor-interacting-serine/threonine-protein-kinase-1-isoform-X1-[Cyclopterus-lumpus] (3)	XP_010120319.1-PREDICTED:-receptor-interacting-serine/threonine-protein-kinase-2-like-[Chlamydotis-macqueenii]	XP_019326602.1-PREDICTED:-receptor-interacting-serine/threonine-protein-kinase-2-[Aptenodytes-forsteri]	XP_010137906.1-PREDICTED:-receptor-interacting-serine/threonine-protein-kinase-2-like-[Buceros-rhinoceros-silvestris]	NP_998243.1-receptor-interacting-serine/threonine-protein-kinase-4-[Danio-rerio]	XP_019324673.1-PREDICTED:-ankyrin-repeat-and-protein-kinase-domain-containing-protein-1-isoform-X2-[Panthera-pardus]	XP_023614642.1-caspase-2-isoform-X8-[Myotis-lucifugus]	XP_035754946.1-caspase-8-isoform-X2-[Egretta-garzetta]	XP_030182980.1-caspase-9-isoform-X1-[Lynx-canadensis]	XP_020826524.1-caspase-10-isoform-X6-[Phascolarctos-cinereus]	XP_040321996.1-FAS-associated-death-domain-protein-[Puma-yagouaroundi]	XP_030744427.1-LOW-QUALITY-PROTEIN:-TIR-domain-containing-adapter-molecule-1-like-[Echinops-telfairi]	XP_039661788.1-nucleotide-binding-oligomerization-domain-containing-protein-1-isoform-X2-[Perca-fluviatilis]	XP_027261351.1-nucleotide-binding-oligomerization-domain-containing-protein-2-isoform-X8-[Cricetulus-griseus]	XP_059185705.1-interferon-regulatory-factor-6-[Centropristis-striata]
XP_044127841.1-receptor-interacting-serine/threonine-protein-kinase-4-like-[Bufo-gargarizans]	XP_046923901.1-Z-DNA-binding-protein-1-isoform-X5-[Lynx-rufus] (2)	XP_008570999.1-PREDICTED:-mixed-lineage-kinase-domain-like-protein-isoform-X2-[Galeopterus-variegatus]	XP_038859384.1-receptor-interacting-serine/threonine-protein-kinase-1-like-[Salvelinus-namaycush]	XP_005362394.1-receptor-interacting-serine/threonine-protein-kinase-2-isoform-X2-[Microtus-ochrogaster]	XP_035526739.1-receptor-interacting-serine/threonine-protein-kinase-2-like-isoform-X2-[Morone-saxatilis]	XP_039930887.1-receptor-interacting-serine/threonine-protein-kinase-2-like-isoform-X1-[Hirundo-rustica]	XP_039600504.1-receptor-interacting-serine/threonine-protein-kinase-4-[Polypterus-senegalus]	XP_034521513.1-LOW-QUALITY-PROTEIN:-ankyrin-repeat-and-protein-kinase-domain-containing-protein-1-[Ailuropoda-melanoleuca]	XP_047455873.1-caspase-2-isoform-X2-[Mugil-cephalus]	XP_010859268.1-PREDICTED:-caspase-8-[Bison-bison-bison]	XP_046938831.1-caspase-9-[Lynx-rufus]	XP_019409411.1-PREDICTED:-caspase-10-like-isoform-X1-[Crocodylus-porosus]	XP_036618170.1-FAS-associated-death-domain-protein-[Trichosurus-vulpecula]	XP_053905911.1-TIR-domain-containing-adapter-molecule-1-[Cuculus-canorus]	XP_039661783.1-nucleotide-binding-oligomerization-domain-containing-protein-1-isoform-X1-[Perca-fluviatilis]	XP_027261349.1-nucleotide-binding-oligomerization-domain-containing-protein-2-isoform-X6-[Cricetulus-griseus] (2)	XP_042360377.1-interferon-regulatory-factor-6-[Plectropomus-leopardus]
XP_044213102.1-receptor-interacting-serine/threonine-protein-kinase-3-like-isoform-X1-[Thunnus-albacares]	XP_046923899.1-Z-DNA-binding-protein-1-isoform-X3-[Lynx-rufus] (2)	XP_008571001.1-PREDICTED:-mixed-lineage-kinase-domain-like-protein-isoform-X3-[Galeopterus-variegatus]	XP_019117598.2-receptor-interacting-serine/threonine-protein-kinase-1-isoform-X2-[Larimichthys-crocea]	XP_026651519.1-receptor-interacting-serine/threonine-protein-kinase-2-[Zonotrichia-albicollis]	XP_010773682.1-PREDICTED:-receptor-interacting-serine/threonine-protein-kinase-2-[Notothenia-coriiceps]	XP_038596524.1-receptor-interacting-serine/threonine-protein-kinase-2-like-isoform-X2-[Tachyglossus-aculeatus]	XP_015269252.1-PREDICTED:-receptor-interacting-serine/threonine-protein-kinase-4-isoform-X2-[Gekko-japonicus]	XP_027703170.1-ankyrin-repeat-and-protein-kinase-domain-containing-protein-1-[Vombatus-ursinus]	XP_033916045.1-caspase-2-isoform-X2-[Melopsittacus-undulatus]	XP_037253877.1-LOW-QUALITY-PROTEIN:-caspase-8-like-[Falco-rusticolus]	XP_045331703.1-caspase-9-isoform-X1-[Leopardus-geoffroyi]	XP_044221802.1-caspase-8-like-[Thunnus-albacares]	XP_041741138.1-FAS-associated-death-domain-protein-like-[Coregonus-clupeaformis]	XP_042691623.1-TIR-domain-containing-adapter-molecule-1-[Centrocercus-urophasianus]	XP_028435989.1-nucleotide-binding-oligomerization-domain-containing-protein-1-isoform-X1-[Perca-flavescens] (2)	XP_048284506.1-nucleotide-binding-oligomerization-domain-containing-protein-2-isoform-X1-[Myodes-glareolus]	XP_049438863.1-interferon-regulatory-factor-6-[Epinephelus-fuscoguttatus]
XP_008316298.1-receptor-interacting-serine/threonine-protein-kinase-3-like-isoform-X2-[Cynoglossus-semilaevis]	XP_046923897.1-Z-DNA-binding-protein-1-isoform-X2-[Lynx-rufus] (2)	XP_008570998.1-PREDICTED:-mixed-lineage-kinase-domain-like-protein-isoform-X1-[Galeopterus-variegatus]	XP_017327894.1-receptor-interacting-serine/threonine-protein-kinase-1-isoform-X1-[Ictalurus-punctatus]	XP_044074144.1-receptor-interacting-serine/threonine-protein-kinase-2-isoform-X2-[Siniperca-chuatsi]	XP_015711414.1-receptor-interacting-serine/threonine-protein-kinase-2-[Coturnix-japonica]	XP_029623020.1-receptor-interacting-serine/threonine-protein-kinase-2-like-isoform-X2-[Salmo-trutta]	XP_036870693.1-receptor-interacting-serine/threonine-protein-kinase-4-[Manis-javanica]	XP_017934101.1-ankyrin-repeat-and-protein-kinase-domain-containing-protein-1-[Manacus-vitellinus]	XP_026957456.1-caspase-2-isoform-X1-[Lagenorhynchus-obliquidens]	XP_004378278.1-caspase-8-isoform-X2-[Trichechus-manatus-latirostris]	XP_049473985.1-caspase-9-[Panthera-uncia]	XP_029309754.1-caspase-8-like-[Cottoperca-gobio]	XP_042370990.1-uncharacterized-protein-LOC121964874-[Plectropomus-leopardus]	XP_009634984.1-TIR-domain-containing-adapter-molecule-1-[Egretta-garzetta]	XP_032373833.1-nucleotide-binding-oligomerization-domain-containing-protein-1-isoform-X1-[Etheostoma-spectabile]	XP_048284508.1-nucleotide-binding-oligomerization-domain-containing-protein-2-isoform-X2-[Myodes-glareolus] (2)	XP_033483171.1-interferon-regulatory-factor-6-[Epinephelus-lanceolatus]
XP_030710342.1-LOW-QUALITY-PROTEIN:-receptor-interacting-serine/threonine-protein-kinase-3-[Globicephala-melas]	XP_046923896.1-Z-DNA-binding-protein-1-isoform-X1-[Lynx-rufus] (2)	XP_008571002.1-PREDICTED:-mixed-lineage-kinase-domain-like-protein-isoform-X4-[Galeopterus-variegatus]	XP_031150002.1-receptor-interacting-serine/threonine-protein-kinase-1-isoform-X1-[Sander-lucioperca]	XP_043989055.1-receptor-interacting-serine/threonine-protein-kinase-2-like-[Gambusia-affinis]	XP_031525826.1-receptor-interacting-serine/threonine-protein-kinase-2-isoform-X1-[Papio-anubis]	XP_030621001.1-receptor-interacting-serine/threonine-protein-kinase-2-like-[Chanos-chanos]	XP_021534940.1-receptor-interacting-serine/threonine-protein-kinase-4-isoform-X1-[Neomonachus-schauinslandi]	XP_023500602.1-ankyrin-repeat-and-protein-kinase-domain-containing-protein-1-isoform-X2-[Equus-caballus]	XP_026140034.1-caspase-2-like-isoform-X2-[Carassius-auratus]	XP_051839750.1-caspase-8-isoform-X2-[Antechinus-flavipes]	XP_007083850.3-caspase-9-[Panthera-tigris]	XP_017547819.1-caspase-10-isoform-X2-[Pygocentrus-nattereri]	XP_029985562.1-FAS-associated-death-domain-protein-[Sphaeramia-orbicularis]	XP_055778339.1-TIR-domain-containing-adapter-molecule-1-[Salvelinus-fontinalis]	XP_034730483.1-nucleotide-binding-oligomerization-domain-containing-protein-1-isoform-X1-[Etheostoma-cragini] (2)	XP_057610297.1-nucleotide-binding-oligomerization-domain-containing-protein-2-isoform-X2-[Chionomys-nivalis] (2)	XP_049894301.1-interferon-regulatory-factor-6-isoform-X1-[Epinephelus-moara]
XP_039524854.1-receptor-interacting-serine/threonine-protein-kinase-3-isoform-X2-[Pimephales-promelas]	XP_046923900.1-Z-DNA-binding-protein-1-isoform-X4-[Lynx-rufus] (2)	XP_013220622.1-mixed-lineage-kinase-domain-like-protein-[Ictidomys-tridecemlineatus]	XP_025237318.1-receptor-interacting-serine/threonine-protein-kinase-1-isoform-X2-[Theropithecus-gelada]	XP_028636757.1-receptor-interacting-serine/threonine-protein-kinase-2-isoform-X1-[Grammomys-surdaster]	XP_034981036.1-receptor-interacting-serine/threonine-protein-kinase-2-isoform-X1-[Zootoca-vivipara]	XP_045074248.1-receptor-interacting-serine/threonine-protein-kinase-2-isoform-X2-[Coregonus-clupeaformis]	XP_041750586.1-receptor-interacting-serine/threonine-protein-kinase-4-[Coregonus-clupeaformis]	XP_051842951.1-LOW-QUALITY-PROTEIN:-ankyrin-repeat-and-protein-kinase-domain-containing-protein-1-[Antechinus-flavipes]	XP_040115990.1-caspase-2-isoform-X2-[Oryx-dammah]	XP_039556026.1-caspase-8-like-isoform-X1-[Passer-montanus]	XP_019317009.2-caspase-9-isoform-X1-[Panthera-pardus]	XP_052422168.1-caspase-8-[Carassius-gibelio]	XP_048343096.1-FAS-associated-death-domain-protein-[Sphaerodactylus-townsendi]	XP_061006613.1-TIR-domain-containing-adapter-molecule-1-[Dama-dama]	XP_059196250.1-nucleotide-binding-oligomerization-domain-containing-protein-1-[Centropristis-striata]	XP_057610296.1-nucleotide-binding-oligomerization-domain-containing-protein-2-isoform-X1-[Chionomys-nivalis]	XP_049894304.1-interferon-regulatory-factor-6-isoform-X2-[Epinephelus-moara]
XP_013365848.1-PREDICTED:-receptor-interacting-serine/threonine-protein-kinase-3-isoform-X2-[Chinchilla-lanigera]	XP_046923902.1-Z-DNA-binding-protein-1-isoform-X6-[Lynx-rufus] (2)	XP_026255032.1-mixed-lineage-kinase-domain-like-protein-[Urocitellus-parryii]	XP_030170804.1-receptor-interacting-serine/threonine-protein-kinase-1-[Lynx-canadensis]	XP_048697110.1-receptor-interacting-serine/threonine-protein-kinase-2-isoform-X1-[Caretta-caretta]	XP_014045307.1-receptor-interacting-serine/threonine-protein-kinase-2-like-isoform-X1-[Salmo-salar]	XP_026881137.2-receptor-interacting-serine/threonine-protein-kinase-2-isoform-X1-[Electrophorus-electricus]	XP_048278754.1-receptor-interacting-serine/threonine-protein-kinase-4-[Myodes-glareolus]	XP_014934114.2-ankyrin-repeat-and-protein-kinase-domain-containing-protein-1-isoform-X1-[Acinonyx-jubatus]	XP_051262050.1-caspase-2-isoform-X2-[Dicentrarchus-labrax]	XP_039556036.1-caspase-8-like-isoform-X2-[Passer-montanus]	XP_042807288.1-caspase-9-[Panthera-leo]	XP_037857686.1-caspase-10-isoform-X3-[Chlorocebus-sabaeus]	XP_009986361.1-PREDICTED:-LOW-QUALITY-PROTEIN:-FAS-associated-death-domain-protein,-partial-[Tauraco-erythrolophus]	XP_027625410.1-LOW-QUALITY-PROTEIN:-TIR-domain-containing-adapter-molecule-1,-partial-[Tupaia-chinensis]	XP_033495605.1-nucleotide-binding-oligomerization-domain-containing-protein-1-isoform-X1-[Epinephelus-lanceolatus]	XP_038168811.1-nucleotide-binding-oligomerization-domain-containing-protein-2-[Arvicola-amphibius] (2)	XP_041639779.1-interferon-regulatory-factor-6-[Cheilinus-undulatus]
XP_026031907.1-receptor-interacting-serine/threonine-protein-kinase-3-like-isoform-X2-[Astatotilapia-calliptera]	XP_030165189.1-Z-DNA-binding-protein-1-isoform-X5-[Lynx-canadensis] (2)	XP_027789017.1-mixed-lineage-kinase-domain-like-protein-[Marmota-flaviventris]	XP_028832680.1-receptor-interacting-serine/threonine-protein-kinase-1-[Denticeps-clupeoides]	XP_015475265.1-receptor-interacting-serine/threonine-protein-kinase-2-isoform-X3-[Parus-major]	XP_027514886.1-receptor-interacting-serine/threonine-protein-kinase-2-isoform-X1-[Corapipo-altera]	XP_009078608.1-PREDICTED:-receptor-interacting-serine/threonine-protein-kinase-2-like-[Acanthisitta-chloris]	XP_043330394.1-receptor-interacting-serine/threonine-protein-kinase-4-[Cervus-canadensis]	XP_041494335.1-LOW-QUALITY-PROTEIN:-ankyrin-repeat-and-protein-kinase-domain-containing-protein-1-[Microtus-oregoni]	XP_047217614.1-caspase-2-isoform-X1-[Girardinichthys-multiradiatus]	XP_004393523.1-PREDICTED:-caspase-8-isoform-X2-[Odobenus-rosmarus-divergens]	XP_029805248.1-caspase-9-[Suricata-suricatta]	XP_005519961.1-PREDICTED:-caspase-10-[Pseudopodoces-humilis]	XP_043561272.1-FAS-associated-death-domain-protein-like-[Chiloscyllium-plagiosum]	XP_034352943.1-TIR-domain-containing-adapter-molecule-1-[Arvicanthis-niloticus]	XP_049903663.1-nucleotide-binding-oligomerization-domain-containing-protein-1-isoform-X1-[Epinephelus-moara]	XP_041506487.1-nucleotide-binding-oligomerization-domain-containing-protein-2-[Microtus-oregoni]	XP_020497743.1-interferon-regulatory-factor-6-[Labrus-bergylta]
XP_042266578.1-receptor-interacting-serine/threonine-protein-kinase-3-like-isoform-X1-[Thunnus-maccoyii]	XP_030165188.1-Z-DNA-binding-protein-1-isoform-X4-[Lynx-canadensis] (2)	XP_015351559.1-mixed-lineage-kinase-domain-like-protein-[Marmota-marmota-marmota]	XP_044113951.1-receptor-interacting-serine/threonine-protein-kinase-1-[Neogale-vison]	XP_018888365.1-receptor-interacting-serine/threonine-protein-kinase-2-[Gorilla-gorilla-gorilla]	XP_051556098.1-receptor-interacting-serine/threonine-protein-kinase-2-like-[Myxocyprinus-asiaticus]	XP_024295745.1-receptor-interacting-serine/threonine-protein-kinase-2-isoform-X2-[Oncorhynchus-tshawytscha]	XP_050757450.1-receptor-interacting-serine/threonine-protein-kinase-4-[Gymnogyps-californianus]	XP_041726743.2-ankyrin-repeat-and-protein-kinase-domain-containing-protein-1-like-[Coregonus-clupeaformis]	XP_016111669.1-PREDICTED:-caspase-2-isoform-X1-[Sinocyclocheilus-grahami]	XP_057601711.1-caspase-8-isoform-X2-[Hippopotamus-amphibius-kiboko]	XP_039085040.1-caspase-9-isoform-X1-[Hyaena-hyaena]	XP_014910647.1-PREDICTED:-caspase-8-like-isoform-X1-[Poecilia-latipinna]	XP_027763605.1-FAS-associated-death-domain-protein-[Empidonax-traillii]	XP_032937860.1-TIR-domain-containing-adapter-molecule-1-[Catharus-ustulatus]	XP_049440223.1-nucleotide-binding-oligomerization-domain-containing-protein-1-isoform-X1-[Epinephelus-fuscoguttatus] (2)	XP_049975790.1-nucleotide-binding-oligomerization-domain-containing-protein-2-[Microtus-fortis]	XP_060897913.1-interferon-regulatory-factor-6-[Labrus-mixtus]
XP_049929914.1-receptor-interacting-serine/threonine-protein-kinase-3-like-isoform-X1-[Epinephelus-moara]	XP_030165187.1-Z-DNA-binding-protein-1-isoform-X3-[Lynx-canadensis] (2)	XP_046291041.1-mixed-lineage-kinase-domain-like-protein-[Marmota-monax]	XP_009069545.1-PREDICTED:-receptor-interacting-serine/threonine-protein-kinase-1-[Acanthisitta-chloris]	XP_046202231.1-receptor-interacting-serine/threonine-protein-kinase-2-like-isoform-X1-[Oncorhynchus-gorbuscha]	XP_017652247.1-receptor-interacting-serine/threonine-protein-kinase-2-isoform-X2-[Nannospalax-galili]	XP_008935371.1-PREDICTED:-receptor-interacting-serine/threonine-protein-kinase-2-like-[Merops-nubicus]	XP_044940395.1-receptor-interacting-serine/threonine-protein-kinase-4-isoform-X1-[Mustela-putorius-furo]	XP_052431519.1-ankyrin-repeat-and-protein-kinase-domain-containing-protein-1-isoform-X1-[Carassius-gibelio]	XP_034074841.1-caspase-2-isoform-X2-[Gymnodraco-acuticeps]	XP_030309630.1-caspase-8-isoform-X2-[Calypte-anna]	XP_039085041.1-caspase-9-isoform-X2-[Hyaena-hyaena]	XP_054200161.1-caspase-10-isoform-X1-[Homo-sapiens]	XP_008587961.1-PREDICTED:-FAS-associated-death-domain-protein-[Galeopterus-variegatus]	XP_055091072.1-LOW-QUALITY-PROTEIN:-TIR-domain-containing-adapter-molecule-1-like-[Symphalangus-syndactylus]	XP_037641639.1-nucleotide-binding-oligomerization-domain-containing-protein-1-isoform-X1-[Sebastes-umbrosus]	XP_005367100.1-nucleotide-binding-oligomerization-domain-containing-protein-2-[Microtus-ochrogaster]	XP_059925452.1-interferon-regulatory-factor-6-[Gadus-macrocephalus]
XP_051565820.1-receptor-interacting-serine/threonine-protein-kinase-3-like-isoform-X1-[Myxocyprinus-asiaticus]	XP_030165190.1-Z-DNA-binding-protein-1-isoform-X6-[Lynx-canadensis] (2)	XP_047385919.1-mixed-lineage-kinase-domain-like-protein-[Sciurus-carolinensis]	XP_008829897.1-receptor-interacting-serine/threonine-protein-kinase-1-isoform-X1-[Nannospalax-galili]	XP_035026265.1-receptor-interacting-serine/threonine-protein-kinase-2-isoform-X1-[Hippoglossus-stenolepis]	XP_027141055.1-receptor-interacting-serine/threonine-protein-kinase-2-isoform-X2-[Larimichthys-crocea]	XP_047934597.1-receptor-interacting-serine/threonine-protein-kinase-2-like-isoform-X2-[Anser-cygnoides]	XP_028583973.1-LOW-QUALITY-PROTEIN:-receptor-interacting-serine/threonine-protein-kinase-4-like-[Podarcis-muralis]	XP_029529089.1-ankyrin-repeat-and-protein-kinase-domain-containing-protein-1-[Oncorhynchus-nerka]	XP_024428627.1-caspase-2-isoform-X1-[Desmodus-rotundus]	XP_010222877.1-PREDICTED:-caspase-8-like-[Tinamus-guttatus]	XP_055187248.1-caspase-9-[Nyctereutes-procyonoides]	XP_027657267.1-caspase-10-isoform-X1-[Falco-cherrug]	XP_032044559.1-FAS-associated-death-domain-protein-[Aythya-fuligula]	XP_049495618.1-TIR-domain-containing-adapter-molecule-1-[Panthera-uncia]	XP_034384521.1-nucleotide-binding-oligomerization-domain-containing-protein-1-isoform-X1-[Cyclopterus-lumpus]	XP_036044142.1-nucleotide-binding-oligomerization-domain-containing-protein-2-isoform-X4-[Onychomys-torridus]	XP_030231406.1-interferon-regulatory-factor-6-[Gadus-morhua]
XP_033996986.1-receptor-interacting-serine/threonine-protein-kinase-4-like-isoform-X4-[Trematomus-bernacchii]	XP_030165186.1-Z-DNA-binding-protein-1-isoform-X2-[Lynx-canadensis] (2)	NP_001388006.1-mixed-lineage-kinase-domain-like-protein-[Rattus-norvegicus]	XP_051732333.1-receptor-interacting-serine/threonine-protein-kinase-1-[Ctenopharyngodon-idella]	XP_042353624.1-receptor-interacting-serine/threonine-protein-kinase-2-like-isoform-X1-[Plectropomus-leopardus]	XP_002759099.1-receptor-interacting-serine/threonine-protein-kinase-2-isoform-X1-[Callithrix-jacchus]	XP_030812044.1-receptor-interacting-serine/threonine-protein-kinase-2-like-[Camarhynchus-parvulus]	XP_028583078.1-receptor-interacting-serine/threonine-protein-kinase-4-isoform-X1-[Podarcis-muralis]	XP_030693128.1-ankyrin-repeat-and-protein-kinase-domain-containing-protein-1-isoform-X2-[Globicephala-melas]	XP_032160815.1-caspase-2-isoform-X1-[Mustela-erminea]	XP_036277515.1-caspase-8-isoform-X1-[Pipistrellus-kuhlii]	NP_001026803.1-caspase-9-[Canis-lupus-familiaris]	XP_057275942.1-caspase-10-isoform-X1-[Pezoporus-wallicus]	XP_032081289.1-FAS-associated-death-domain-protein-isoform-X1-[Thamnophis-elegans]	XP_015507135.1-TIR-domain-containing-adapter-molecule-1-[Parus-major]	XP_034384522.1-nucleotide-binding-oligomerization-domain-containing-protein-1-isoform-X2-[Cyclopterus-lumpus] (2)	XP_036044138.1-nucleotide-binding-oligomerization-domain-containing-protein-2-isoform-X1-[Onychomys-torridus]	XP_056462466.1-interferon-regulatory-factor-6-[Gadus-chalcogrammus]
XP_008409496.1-PREDICTED:-receptor-interacting-serine/threonine-protein-kinase-3-like-isoform-X1-[Poecilia-reticulata]	XP_030165185.1-Z-DNA-binding-protein-1-isoform-X1-[Lynx-canadensis] (2)	XP_032743911.1-mixed-lineage-kinase-domain-like-protein-[Rattus-rattus]	XP_035286785.1-receptor-interacting-serine/threonine-protein-kinase-1-isoform-X2-[Anguilla-anguilla]	XP_007554908.1-PREDICTED:-receptor-interacting-serine/threonine-protein-kinase-2-isoform-X3-[Poecilia-formosa]	XP_001084687.1-receptor-interacting-serine/threonine-protein-kinase-2-isoform-X1-[Macaca-mulatta]	XP_020661399.1-receptor-interacting-serine/threonine-protein-kinase-2-like-isoform-X2-[Pogona-vitticeps]	XP_003976631.1-receptor-interacting-serine/threonine-protein-kinase-4-isoform-X1-[Takifugu-rubripes]	XP_032401762.1-ankyrin-repeat-and-protein-kinase-domain-containing-protein-1-[Xiphophorus-hellerii]	XP_003896806.2-caspase-2-isoform-X1-[Papio-anubis]	XP_007964030.1-caspase-8-isoform-X1-[Chlorocebus-sabaeus]	XP_048962927.1-caspase-9-isoform-X5-[Canis-lupus-dingo]	XP_052648917.1-caspase-10-[Harpia-harpyja]	XP_029495658.1-FAS-associated-death-domain-protein-like-[Oncorhynchus-nerka]	XP_020347942.1-TIR-domain-containing-adapter-molecule-1-[Oncorhynchus-kisutch]	XP_054478065.1-nucleotide-binding-oligomerization-domain-containing-protein-1-[Anoplopoma-fimbria] (2)	XP_036044139.1-nucleotide-binding-oligomerization-domain-containing-protein-2-isoform-X2-[Onychomys-torridus]	XP_029946682.1-interferon-regulatory-factor-6-[Salarias-fasciatus]
XP_029991616.1-receptor-interacting-serine/threonine-protein-kinase-4-like-[Sphaeramia-orbicularis]	XP_047709950.1-Z-DNA-binding-protein-1-isoform-X2-[Prionailurus-viverrinus] (2)	XP_034378636.1-mixed-lineage-kinase-domain-like-protein-[Arvicanthis-niloticus]	XP_035286786.1-receptor-interacting-serine/threonine-protein-kinase-1-isoform-X3-[Anguilla-anguilla]	XP_023373675.1-receptor-interacting-serine/threonine-protein-kinase-2-isoform-X1-[Otolemur-garnettii]	XP_030879712.1-receptor-interacting-serine/threonine-protein-kinase-2-[Leptonychotes-weddellii]	XP_040426730.1-receptor-interacting-serine/threonine-protein-kinase-2-like-isoform-X1-[Cygnus-olor]	NP_001093797.1-receptor-interacting-serine/threonine-protein-kinase-4-[Bos-taurus]	XP_007172062.2-ankyrin-repeat-and-protein-kinase-domain-containing-protein-1-[Balaenoptera-acutorostrata-scammoni]	XP_036850456.1-caspase-2-[Manis-javanica]	XP_044526575.1-caspase-8-like-[Gracilinanus-agilis]	XP_025303053.3-caspase-9-isoform-X3-[Canis-lupus-dingo]	XP_034087920.1-caspase-8-isoform-X2-[Gymnodraco-acuticeps]	XP_052517722.1-FAS-associated-death-domain-protein-[Budorcas-taxicolor]	XP_030220008.1-TIR-domain-containing-adapter-molecule-1-like-[Gadus-morhua]	XP_031734476.1-nucleotide-binding-oligomerization-domain-containing-protein-1-isoform-X2-[Anarrhichthys-ocellatus] (2)	XP_036044140.1-nucleotide-binding-oligomerization-domain-containing-protein-2-isoform-X3-[Onychomys-torridus]	XP_008318103.1-interferon-regulatory-factor-6-[Cynoglossus-semilaevis]
XP_051555318.1-receptor-interacting-serine/threonine-protein-kinase-3-like-isoform-X4-[Myxocyprinus-asiaticus]	XP_047709952.1-Z-DNA-binding-protein-1-isoform-X3-[Prionailurus-viverrinus] (2)	XP_028624554.1-mixed-lineage-kinase-domain-like-protein-[Grammomys-surdaster]	XP_036098393.1-LOW-QUALITY-PROTEIN:-receptor-interacting-serine/threonine-protein-kinase-1-like-[Molossus-molossus]	XP_047639600.1-receptor-interacting-serine/threonine-protein-kinase-2-isoform-X1-[Phacochoerus-africanus]	XP_027698978.1-receptor-interacting-serine/threonine-protein-kinase-2-isoform-X3-[Vombatus-ursinus]	XP_023851074.1-receptor-interacting-serine/threonine-protein-kinase-2-like-isoform-X1-[Salvelinus-alpinus]	XP_021261780.1-receptor-interacting-serine/threonine-protein-kinase-4-[Numida-meleagris]	XP_014740114.1-PREDICTED:-ankyrin-repeat-and-protein-kinase-domain-containing-protein-1-[Sturnus-vulgaris]	XP_036916548.1-caspase-2-isoform-X5-[Sturnira-hondurensis]	XP_005484240.1-caspase-8-[Zonotrichia-albicollis]	XP_025303056.3-caspase-9-isoform-X6-[Canis-lupus-dingo]	XP_051568560.1-caspase-8-like-isoform-X3-[Myxocyprinus-asiaticus]	XP_047375282.1-FAS-associated-death-domain-protein-[Sciurus-carolinensis]	XP_039538861.1-LOW-QUALITY-PROTEIN:-TIR-domain-containing-adapter-molecule-1-[Pimephales-promelas]	XP_031734475.1-nucleotide-binding-oligomerization-domain-containing-protein-1-isoform-X1-[Anarrhichthys-ocellatus]	XP_028747661.1-LOW-QUALITY-PROTEIN:-nucleotide-binding-oligomerization-domain-containing-protein-2-[Peromyscus-leucopus] (2)	XP_047204517.1-interferon-regulatory-factor-6-[Girardinichthys-multiradiatus]
XP_045921705.1-receptor-interacting-serine/threonine-protein-kinase-3-[Micropterus-dolomieu]	XP_047709949.1-Z-DNA-binding-protein-1-isoform-X1-[Prionailurus-viverrinus] (2)	XP_052023027.1-mixed-lineage-kinase-domain-like-protein-isoform-X1-[Apodemus-sylvaticus]	XP_029097769.1-receptor-interacting-serine/threonine-protein-kinase-1-isoform-X1-[Monodon-monoceros]	XP_009897466.1-PREDICTED:-receptor-interacting-serine/threonine-protein-kinase-2-like-[Dryobates-pubescens]	XP_037659102.1-receptor-interacting-serine/threonine-protein-kinase-2-isoform-X1-[Choloepus-didactylus]	XP_045564756.1-receptor-interacting-serine/threonine-protein-kinase-2-like-isoform-X2-[Salmo-salar]	XP_015678073.1-receptor-interacting-serine/threonine-protein-kinase-4-[Protobothrops-mucrosquamatus]	XP_021552293.1-LOW-QUALITY-PROTEIN:-ankyrin-repeat-and-protein-kinase-domain-containing-protein-1-[Neomonachus-schauinslandi]	XP_006071934.2-caspase-2-isoform-X1-[Bubalus-bubalis]	XP_029872781.1-caspase-8-like-isoform-X1-[Aquila-chrysaetos-chrysaetos]	XP_038513759.1-caspase-9-isoform-X2-[Canis-lupus-familiaris]	XP_029967261.1-caspase-8-like-isoform-X1-[Salarias-fasciatus]	XP_035484345.1-FAS-associated-death-domain-protein-[Scophthalmus-maximus]	XP_052555886.1-TIR-domain-containing-adapter-molecule-1-[Tympanuchus-pallidicinctus]	XP_031734477.1-nucleotide-binding-oligomerization-domain-containing-protein-1-isoform-X3-[Anarrhichthys-ocellatus] (2)	XP_006971835.2-nucleotide-binding-oligomerization-domain-containing-protein-2-[Peromyscus-maniculatus-bairdii]	XP_038135886.1-interferon-regulatory-factor-6-[Cyprinodon-tularosa]
XP_045425653.1-receptor-interacting-serine/threonine-protein-kinase-3-[Lemur-catta]	XP_026902454.1-Z-DNA-binding-protein-1-isoform-X2-[Acinonyx-jubatus] (2)	XP_052023028.1-mixed-lineage-kinase-domain-like-protein-isoform-X2-[Apodemus-sylvaticus]	XP_020743257.1-receptor-interacting-serine/threonine-protein-kinase-1-isoform-X1-[Odocoileus-virginianus-texanus]	XP_051466787.1-receptor-interacting-serine/threonine-protein-kinase-2-isoform-X3-[Apus-apus]	XP_003268323.1-receptor-interacting-serine/threonine-protein-kinase-2-[Nomascus-leucogenys]	XP_035192452.1-receptor-interacting-serine/threonine-protein-kinase-2-like-isoform-X2-[Oxyura-jamaicensis]	XP_029030065.1-receptor-interacting-serine/threonine-protein-kinase-4-isoform-X1-[Betta-splendens]	XP_033028358.1-ankyrin-repeat-and-protein-kinase-domain-containing-protein-1-isoform-X1-[Lacerta-agilis]	XP_043935792.1-caspase-2-isoform-X2-[Protopterus-annectens]	XP_009949365.1-PREDICTED:-caspase-8-like-[Leptosomus-discolor]	XP_038513760.1-caspase-9-isoform-X3-[Canis-lupus-familiaris]	XP_038643839.1-caspase-8-like-isoform-X1-[Scyliorhinus-canicula]	XP_042616953.1-FAS-associated-death-domain-protein-like-[Cyprinus-carpio]	XP_046713642.1-TIR-domain-containing-adapter-molecule-1-[Silurus-meridionalis]	XP_012737335.2-nucleotide-binding-oligomerization-domain-containing-protein-1-isoform-X1-[Fundulus-heteroclitus] (2)	XP_059118654.1-nucleotide-binding-oligomerization-domain-containing-protein-2-[Peromyscus-eremicus]	XP_015231519.1-PREDICTED:-interferon-regulatory-factor-6-[Cyprinodon-variegatus]
XP_017317249.1-ankyrin-repeat-and-protein-kinase-domain-containing-protein-1-isoform-X1-[Ictalurus-punctatus]	XP_026902455.1-Z-DNA-binding-protein-1-isoform-X3-[Acinonyx-jubatus] (2)	XP_031197317.1-mixed-lineage-kinase-domain-like-protein-[Mastomys-coucha]	XP_040000395.1-receptor-interacting-serine/threonine-protein-kinase-1-isoform-X3-[Xiphias-gladius]	XP_048276262.1-receptor-interacting-serine/threonine-protein-kinase-2-isoform-X2-[Myodes-glareolus]	XP_035269815.1-receptor-interacting-serine/threonine-protein-kinase-2-isoform-X1-[Anguilla-anguilla]	XP_035275947.1-receptor-interacting-serine/threonine-protein-kinase-2-isoform-X1-[Anguilla-anguilla]	XP_010869031.2-LOW-QUALITY-PROTEIN:-receptor-interacting-serine/threonine-protein-kinase-4-[Esox-lucius]	XP_032057637.1-ankyrin-repeat-and-protein-kinase-domain-containing-protein-1-[Aythya-fuligula]	XP_028381557.1-caspase-2-isoform-X4-[Phyllostomus-discolor]	XP_051009819.1-caspase-8-[Acomys-russatus]	XP_025303052.3-caspase-9-isoform-X2-[Canis-lupus-dingo]	XP_036422969.1-caspase-8-isoform-X3-[Colossoma-macropomum]	XP_003909466.2-FAS-associated-death-domain-protein-[Papio-anubis]	XP_002761653.3-TIR-domain-containing-adapter-molecule-1-[Callithrix-jacchus]	XP_008298981.1-PREDICTED:-nucleotide-binding-oligomerization-domain-containing-protein-1-isoform-X3-[Stegastes-partitus]	XP_052584340.1-nucleotide-binding-oligomerization-domain-containing-protein-2-isoform-X3-[Peromyscus-californicus-insignis]	XP_030584928.1-interferon-regulatory-factor-6-[Archocentrus-centrarchus]
XP_006835581.1-PREDICTED:-receptor-interacting-serine/threonine-protein-kinase-3-[Chrysochloris-asiatica]	XP_026902453.1-Z-DNA-binding-protein-1-isoform-X1-[Acinonyx-jubatus] (2)	XP_021076382.1-mixed-lineage-kinase-domain-like-protein-[Mus-pahari]	XP_042321680.1-receptor-interacting-serine/threonine-protein-kinase-1-isoform-X1-[Sceloporus-undulatus]	XP_041256761.1-receptor-interacting-serine/threonine-protein-kinase-2-like-[Onychostruthus-taczanowskii]	XP_035993799.1-receptor-interacting-serine/threonine-protein-kinase-2-isoform-X1-[Fundulus-heteroclitus]	XP_009884770.1-PREDICTED:-receptor-interacting-serine/threonine-protein-kinase-2-like-[Charadrius-vociferus]	XP_014823163.1-PREDICTED:-receptor-interacting-serine/threonine-protein-kinase-4-[Poecilia-mexicana]	XP_005987334.1-PREDICTED:-ankyrin-repeat-and-protein-kinase-domain-containing-protein-1-[Latimeria-chalumnae]	XP_056090834.1-caspase-2-isoform-X1-[Rhinichthys-klamathensis-goyatoka]	XP_017583737.1-PREDICTED:-caspase-8-isoform-X2-[Corvus-brachyrhynchos]	XP_025303051.3-caspase-9-isoform-X1-[Canis-lupus-dingo]	XP_049904905.1-caspase-8-[Epinephelus-moara]	XP_047219379.1-protein-FADD-[Girardinichthys-multiradiatus]	XP_057566426.1-TIR-domain-containing-adapter-molecule-1-[Hippopotamus-amphibius-kiboko]	XP_008298979.1-PREDICTED:-nucleotide-binding-oligomerization-domain-containing-protein-1-isoform-X1-[Stegastes-partitus]	XP_052584338.1-nucleotide-binding-oligomerization-domain-containing-protein-2-isoform-X2-[Peromyscus-californicus-insignis]	XP_024658332.1-interferon-regulatory-factor-6-[Maylandia-zebra]
XP_008570521.1-PREDICTED:-receptor-interacting-serine/threonine-protein-kinase-3-[Galeopterus-variegatus]	XP_006929696.2-Z-DNA-binding-protein-1-isoform-X2-[Felis-catus] (2)	XP_021026554.1-mixed-lineage-kinase-domain-like-protein-[Mus-caroli]	XP_025772845.1-receptor-interacting-serine/threonine-protein-kinase-1-[Puma-concolor]	XP_015669464.2-receptor-interacting-serine/threonine-protein-kinase-2-[Protobothrops-mucrosquamatus]	XP_039878166.1-receptor-interacting-serine/threonine-protein-kinase-2-[Simochromis-diagramma]	XP_032926066.1-receptor-interacting-serine/threonine-protein-kinase-2-like-[Catharus-ustulatus]	XP_017907127.1-PREDICTED:-receptor-interacting-serine/threonine-protein-kinase-4-[Capra-hircus]	XP_010220219.1-PREDICTED:-LOW-QUALITY-PROTEIN:-ankyrin-repeat-and-protein-kinase-domain-containing-protein-1-[Tinamus-guttatus]	XP_026226349.1-caspase-2-isoform-X9-[Anabas-testudineus]	XP_043854683.1-caspase-8-[Dromiciops-gliroides]	XP_038513758.1-caspase-9-isoform-X1-[Canis-lupus-familiaris]	XP_007190570.2-caspase-10-isoform-X6-[Balaenoptera-acutorostrata]	XP_047436200.1-protein-FADD-[Mugil-cephalus]	XP_004542615.2-TIR-domain-containing-adapter-molecule-1-[Maylandia-zebra]	XP_008298980.1-PREDICTED:-nucleotide-binding-oligomerization-domain-containing-protein-1-isoform-X2-[Stegastes-partitus]	XP_052584342.1-nucleotide-binding-oligomerization-domain-containing-protein-2-isoform-X5-[Peromyscus-californicus-insignis]	XP_026022191.1-interferon-regulatory-factor-6-like-isoform-X1-[Astatotilapia-calliptera]
XP_034391917.1-receptor-interacting-serine/threonine-protein-kinase-3-like-isoform-X1-[Cyclopterus-lumpus]	XP_006929695.2-Z-DNA-binding-protein-1-isoform-X1-[Felis-catus] (2)	XP_006531506.1-mixed-lineage-kinase-domain-like-protein-isoform-X4-[Mus-musculus]	XP_040105288.1-receptor-interacting-serine/threonine-protein-kinase-1-isoform-X1-[Oryx-dammah]	XP_027417404.1-receptor-interacting-serine/threonine-protein-kinase-2-isoform-X1-[Bos-indicus-x-Bos-taurus]	XP_042573844.1-receptor-interacting-serine/threonine-protein-kinase-2-like-[Cyprinus-carpio]	XP_039238486.1-receptor-interacting-serine/threonine-protein-kinase-2-like-[Pipra-filicauda]	XP_019328583.1-PREDICTED:-receptor-interacting-serine/threonine-protein-kinase-4-[Aptenodytes-forsteri]	XP_025214138.1-LOW-QUALITY-PROTEIN:-ankyrin-repeat-and-protein-kinase-domain-containing-protein-1-[Theropithecus-gelada]	XP_054349648.1-caspase-2-isoform-X2-[Pongo-pygmaeus]	XP_023615987.1-LOW-QUALITY-PROTEIN:-caspase-8-[Myotis-lucifugus]	XP_025303054.3-caspase-9-isoform-X4-[Canis-lupus-dingo]	NP_001254593.1-truncated-caspase-10-[Gasterosteus-aculeatus]	XP_010204492.1-PREDICTED:-FAS-associated-death-domain-protein-[Colius-striatus]	XP_016085949.1-PREDICTED:-TIR-domain-containing-adapter-molecule-1-like-[Sinocyclocheilus-grahami]	XP_022042689.2-nucleotide-binding-oligomerization-domain-containing-protein-1-[Acanthochromis-polyacanthus] (2)	XP_052584343.1-nucleotide-binding-oligomerization-domain-containing-protein-2-isoform-X6-[Peromyscus-californicus-insignis]	XP_026022192.1-interferon-regulatory-factor-6-like-isoform-X2-[Astatotilapia-calliptera]
XP_047452447.1-receptor-interacting-serine/threonine-protein-kinase-3-like-isoform-X2-[Mugil-cephalus]	XP_019681873.2-Z-DNA-binding-protein-1-isoform-X3-[Felis-catus] (2)	NP_083281.1-mixed-lineage-kinase-domain-like-protein-isoform-2-[Mus-musculus]	XP_028297130.1-receptor-interacting-serine/threonine-protein-kinase-1-isoform-X2-[Gouania-willdenowi]	XP_049675189.1-receptor-interacting-serine/threonine-protein-kinase-2-isoform-X1-[Accipiter-gentilis]	XP_051016538.1-receptor-interacting-serine/threonine-protein-kinase-2-[Acomys-russatus]	XP_038003785.1-receptor-interacting-serine/threonine-protein-kinase-2-like-isoform-X2-[Motacilla-alba-alba]	XP_024417613.1-receptor-interacting-serine/threonine-protein-kinase-4-[Desmodus-rotundus]	XP_046322847.1-LOW-QUALITY-PROTEIN:-ankyrin-repeat-and-protein-kinase-domain-containing-protein-1-[Marmota-monax]	XP_025710591.1-caspase-2-isoform-X1-[Callorhinus-ursinus]	XP_009682550.1-PREDICTED:-caspase-8-like-[Struthio-camelus-australis]	XP_041623907.1-caspase-9-isoform-X1-[Vulpes-lagopus]	XP_020930185.1-caspase-10-isoform-X1-[Sus-scrofa]	XP_036867469.1-FAS-associated-death-domain-protein-[Manis-javanica]	XP_036941221.1-TIR-domain-containing-adapter-molecule-1-[Acanthopagrus-latus]	XP_023154591.2-nucleotide-binding-oligomerization-domain-containing-protein-1-isoform-X2-[Amphiprion-ocellaris]	XP_052584336.1-nucleotide-binding-oligomerization-domain-containing-protein-2-isoform-X1-[Peromyscus-californicus-insignis] (2)	XP_005469613.1-interferon-regulatory-factor-6-[Oreochromis-niloticus]
XP_008316289.1-receptor-interacting-serine/threonine-protein-kinase-3-like-isoform-X1-[Cynoglossus-semilaevis]	XP_025788172.1-Z-DNA-binding-protein-1-[Puma-concolor] (2)	NP_001297542.1-mixed-lineage-kinase-domain-like-protein-isoform-1-[Mus-musculus]	XP_021552561.1-receptor-interacting-serine/threonine-protein-kinase-1-[Neomonachus-schauinslandi]	XP_015745333.2-receptor-interacting-serine/threonine-protein-kinase-2-like-[Python-bivittatus]	XP_006056644.3-receptor-interacting-serine/threonine-protein-kinase-2-isoform-X1-[Bubalus-bubalis]		XP_032485204.1-receptor-interacting-serine/threonine-protein-kinase-4-[Phocoena-sinus]	XP_039677664.1-ankyrin-repeat-and-protein-kinase-domain-containing-protein-1-isoform-X1-[Perca-fluviatilis]	XP_035018577.1-caspase-2-isoform-X4-[Hippoglossus-stenolepis]	XP_005306306.1-caspase-8-[Chrysemys-picta-bellii]	XP_025867743.1-caspase-9-isoform-X1-[Vulpes-vulpes]	XP_047725821.1-caspase-10-isoform-X2-[Prionailurus-viverrinus]	XP_030415974.1-FAS-associated-death-domain-protein-[Gopherus-evgoodei]	XP_007525002.2-TIR-domain-containing-adapter-molecule-1-isoform-X1-[Erinaceus-europaeus]	XP_023154590.2-nucleotide-binding-oligomerization-domain-containing-protein-1-isoform-X1-[Amphiprion-ocellaris] (2)	XP_052584345.1-nucleotide-binding-oligomerization-domain-containing-protein-2-isoform-X8-[Peromyscus-californicus-insignis] (2)	XP_031612959.1-interferon-regulatory-factor-6-[Oreochromis-aureus]
XP_034443089.1-receptor-interacting-serine/threonine-protein-kinase-3-like-isoform-X1-[Hippoglossus-hippoglossus]	XP_040315641.1-Z-DNA-binding-protein-1-isoform-X3-[Puma-yagouaroundi] (2)	XP_036010235.1-mixed-lineage-kinase-domain-like-protein-isoform-X3-[Mus-musculus]	XP_039877172.1-receptor-interacting-serine/threonine-protein-kinase-1-isoform-X2-[Simochromis-diagramma]	XP_014383921.1-PREDICTED:-receptor-interacting-serine/threonine-protein-kinase-2-[Myotis-brandtii]	XP_023833439.1-receptor-interacting-serine/threonine-protein-kinase-2-like-[Salvelinus-alpinus]		XP_040339807.1-receptor-interacting-serine/threonine-protein-kinase-4-[Puma-yagouaroundi]	XP_041923603.1-ankyrin-repeat-and-protein-kinase-domain-containing-protein-1-isoform-X2-[Alosa-sapidissima]	XP_039099013.1-caspase-2-isoform-X2-[Hyaena-hyaena]	XP_051479620.1-caspase-8-isoform-X3-[Apus-apus]	XP_025867745.1-caspase-9-isoform-X3-[Vulpes-vulpes]	XP_057193415.1-caspase-8-like-isoform-X2-[Triplophysa-rosa]	XP_002821454.1-FAS-associated-death-domain-protein-[Pongo-abelii]	XP_030365526.1-TIR-domain-containing-adapter-molecule-1-[Strigops-habroptila]	XP_028281745.1-nucleotide-binding-oligomerization-domain-containing-protein-1-isoform-X1-[Parambassis-ranga]	NP_001401840.1-nucleotide-binding-oligomerization-domain-containing-protein-2-[Rattus-norvegicus] (2)	XP_006806783.1-interferon-regulatory-factor-6-[Neolamprologus-brichardi]
XP_022069420.2-receptor-interacting-serine/threonine-protein-kinase-3-like-isoform-X2-[Acanthochromis-polyacanthus]	XP_040315639.1-Z-DNA-binding-protein-1-isoform-X1-[Puma-yagouaroundi] (2)	XP_048293193.1-mixed-lineage-kinase-domain-like-protein-[Myodes-glareolus]	XP_048019260.1-receptor-interacting-serine/threonine-protein-kinase-1-isoform-X2-[Megalobrama-amblycephala]	XP_044126202.1-receptor-interacting-serine/threonine-protein-kinase-2-like-[Bufo-gargarizans]	XP_017913674.1-PREDICTED:-receptor-interacting-serine/threonine-protein-kinase-2-[Capra-hircus]		XP_034609104.1-receptor-interacting-serine/threonine-protein-kinase-4-[Trachemys-scripta-elegans]	XP_050767002.1-LOW-QUALITY-PROTEIN:-ankyrin-repeat-and-protein-kinase-domain-containing-protein-1-[Gymnogyps-californianus]	XP_031432331.1-caspase-2-isoform-X1-[Clupea-harengus]	XP_037768405.1-caspase-8-isoform-X1-[Chelonia-mydas]	XP_025867744.1-caspase-9-isoform-X2-[Vulpes-vulpes]	XP_045662440.1-caspase-10-isoform-X2-[Ursus-americanus]	XP_051820834.1-FAS-associated-death-domain-protein-[Antechinus-flavipes]	XP_004441454.1-PREDICTED:-TIR-domain-containing-adapter-molecule-1-[Ceratotherium-simum-simum]	XP_028281746.1-nucleotide-binding-oligomerization-domain-containing-protein-1-isoform-X2-[Parambassis-ranga] (2)	XP_052022616.1-nucleotide-binding-oligomerization-domain-containing-protein-2-isoform-X3-[Apodemus-sylvaticus]	XP_039884616.1-interferon-regulatory-factor-6-[Simochromis-diagramma]
XP_010902059.2-receptor-interacting-serine/threonine-protein-kinase-3-isoform-X2-[Esox-lucius]	XP_040315640.1-Z-DNA-binding-protein-1-isoform-X2-[Puma-yagouaroundi] (2)	XP_038168744.1-mixed-lineage-kinase-domain-like-protein-[Arvicola-amphibius]	XP_026874851.2-receptor-interacting-serine/threonine-protein-kinase-1-isoform-X2-[Electrophorus-electricus]	XP_012601059.1-receptor-interacting-serine/threonine-protein-kinase-2-[Microcebus-murinus]	XP_044150764.1-receptor-interacting-serine/threonine-protein-kinase-2-[Bufo-gargarizans]		XP_032030235.1-receptor-interacting-serine/threonine-protein-kinase-4-isoform-X1-[Hylobates-moloch]	XP_013010833.1-ankyrin-repeat-and-protein-kinase-domain-containing-protein-1-isoform-X1-[Cavia-porcellus]	XP_030606019.1-caspase-2-isoform-X2-[Archocentrus-centrarchus]	XP_006975106.1-caspase-8-[Peromyscus-maniculatus-bairdii]	XP_004397165.1-PREDICTED:-caspase-9-isoform-X1-[Odobenus-rosmarus-divergens]	XP_047629180.1-caspase-10-[Phacochoerus-africanus]	XP_009498570.1-PREDICTED:-FAS-associated-death-domain-protein,-partial-[Phalacrocorax-carbo]	XP_052656966.1-TIR-domain-containing-adapter-molecule-1-[Harpia-harpyja]	XP_036929098.1-nucleotide-binding-oligomerization-domain-containing-protein-1-isoform-X1-[Acanthopagrus-latus]	XP_052022615.1-nucleotide-binding-oligomerization-domain-containing-protein-2-isoform-X2-[Apodemus-sylvaticus]	XP_005741457.1-PREDICTED:-interferon-regulatory-factor-6-[Pundamilia-nyererei]
XP_032434527.1-receptor-interacting-serine/threonine-protein-kinase-3-like-isoform-X1-[Xiphophorus-hellerii]	XP_044909389.1-Z-DNA-binding-protein-1-isoform-X4-[Felis-catus] (2)	XP_050000357.1-mixed-lineage-kinase-domain-like-protein-[Microtus-fortis]	XP_010072880.1-PREDICTED:-receptor-interacting-serine/threonine-protein-kinase-1-[Pterocles-gutturalis]	XP_009511302.1-PREDICTED:-receptor-interacting-serine/threonine-protein-kinase-2-like-[Phalacrocorax-carbo]	XP_004767029.1-receptor-interacting-serine/threonine-protein-kinase-2-isoform-X1-[Mustela-putorius-furo]		XP_027544985.1-receptor-interacting-serine/threonine-protein-kinase-4-[Neopelma-chrysocephalum]	XP_049634632.1-ankyrin-repeat-and-protein-kinase-domain-containing-protein-1-[Suncus-etruscus]	XP_010715921.1-caspase-2-[Meleagris-gallopavo]	XP_031457090.1-caspase-8-like-[Phasianus-colchicus]	XP_012416703.1-PREDICTED:-caspase-9-isoform-X2-[Odobenus-rosmarus-divergens]	XP_035392982.1-caspase-10-like-isoform-X2-[Cygnus-atratus]	XP_016140020.1-PREDICTED:-FAS-associated-death-domain-protein-like-isoform-X1-[Sinocyclocheilus-grahami]	XP_045907650.1-TIR-domain-containing-adapter-molecule-1-[Micropterus-dolomieu]	XP_036929099.1-nucleotide-binding-oligomerization-domain-containing-protein-1-isoform-X2-[Acanthopagrus-latus]	XP_052022613.1-nucleotide-binding-oligomerization-domain-containing-protein-2-isoform-X1-[Apodemus-sylvaticus]	XP_024658343.1-interferon-regulatory-factor-6-isoform-X1-[Maylandia-zebra]
XP_041429389.1-receptor-interacting-serine/threonine-protein-kinase-4-isoform-X12-[Xenopus-laevis]	XP_040315642.1-Z-DNA-binding-protein-1-isoform-X4-[Puma-yagouaroundi] (2)	XP_057609983.1-mixed-lineage-kinase-domain-like-protein-[Chionomys-nivalis]	XP_034618120.1-receptor-interacting-serine/threonine-protein-kinase-1-isoform-X1-[Trachemys-scripta-elegans]	XP_034038864.1-receptor-interacting-serine/threonine-protein-kinase-2-like-[Thalassophryne-amazonica]	XP_033699059.1-receptor-interacting-serine/threonine-protein-kinase-2-isoform-X2-[Tursiops-truncatus]		XP_023571831.1-receptor-interacting-serine/threonine-protein-kinase-4-isoform-X2-[Octodon-degus]	XP_033717942.1-ankyrin-repeat-and-protein-kinase-domain-containing-protein-1-isoform-X1-[Tursiops-truncatus]	XP_029778106.1-caspase-2-[Suricata-suricatta]	XP_042522942.1-caspase-8-[Dipodomys-spectabilis]	XP_027964292.1-caspase-9-isoform-X1-[Eumetopias-jubatus]	XP_007571752.1-PREDICTED:-caspase-8-like-[Poecilia-formosa]	XP_042267874.1-protein-FADD-isoform-X1-[Thunnus-maccoyii]	XP_054252148.1-TIR-domain-containing-adapter-molecule-1-[Indicator-indicator]	XP_030250649.1-nucleotide-binding-oligomerization-domain-containing-protein-1-isoform-X3-[Sparus-aurata]	XP_052022617.1-nucleotide-binding-oligomerization-domain-containing-protein-2-isoform-X4-[Apodemus-sylvaticus]	XP_024658345.1-interferon-regulatory-factor-6-isoform-X2-[Maylandia-zebra]
XP_029436842.1-receptor-interacting-serine/threonine-protein-kinase-3-isoform-X1-[Rhinatrema-bivittatum]	XP_049506532.1-Z-DNA-binding-protein-1-isoform-X3-[Panthera-uncia] (2)	XP_005345906.1-mixed-lineage-kinase-domain-like-protein-[Microtus-ochrogaster]	XP_007972024.2-receptor-interacting-serine/threonine-protein-kinase-1-isoform-X1-[Chlorocebus-sabaeus]	XP_031150231.1-receptor-interacting-serine/threonine-protein-kinase-2-isoform-X2-[Sander-lucioperca]	XP_020944798.1-receptor-interacting-serine/threonine-protein-kinase-2-isoform-X1-[Sus-scrofa]		XP_049896258.1-receptor-interacting-serine/threonine-protein-kinase-4-[Epinephelus-moara]	XP_035120481.1-ankyrin-repeat-and-protein-kinase-domain-containing-protein-1-[Callithrix-jacchus]	XP_017366791.1-caspase-2-isoform-X1-[Cebus-imitator]	XP_029081813.1-caspase-8-isoform-X1-[Monodon-monoceros]	XP_027426753.1-LOW-QUALITY-PROTEIN:-caspase-9-[Zalophus-californianus]	XP_026069881.1-caspase-8-like-[Carassius-auratus]	XP_054054453.1-FAS-associated-death-domain-protein-[Rissa-tridactyla]	XP_017576226.1-TIR-domain-containing-adapter-molecule-1-[Pygocentrus-nattereri]	XP_030250647.1-nucleotide-binding-oligomerization-domain-containing-protein-1-isoform-X1-[Sparus-aurata]	XP_034378589.1-nucleotide-binding-oligomerization-domain-containing-protein-2-[Arvicanthis-niloticus]	XP_040060837.1-interferon-regulatory-factor-6-[Gasterosteus-aculeatus-aculeatus]
XP_042796536.1-receptor-interacting-serine/threonine-protein-kinase-3-[Panthera-leo]	XP_042836021.1-Z-DNA-binding-protein-1-isoform-X2-[Panthera-tigris] (2)	XP_041506420.1-mixed-lineage-kinase-domain-like-protein-isoform-X1-[Microtus-oregoni]	XP_023109490.2-receptor-interacting-serine/threonine-protein-kinase-1-isoform-X1-[Felis-catus]	XP_036193403.1-receptor-interacting-serine/threonine-protein-kinase-2-isoform-X2-[Myotis-myotis]	XP_044932642.1-LOW-QUALITY-PROTEIN:-receptor-interacting-serine/threonine-protein-kinase-2-like-[Mustela-putorius-furo]		XP_011857978.1-PREDICTED:-receptor-interacting-serine/threonine-protein-kinase-4-isoform-X1-[Mandrillus-leucophaeus]	XP_003777938.1-LOW-QUALITY-PROTEIN:-ankyrin-repeat-and-protein-kinase-domain-containing-protein-1-[Pongo-abelii]	XP_043117761.1-caspase-2-isoform-X1-[Puntigrus-tetrazona]	XP_010005641.1-PREDICTED:-caspase-8-like-[Chaetura-pelagica]	XP_025712516.1-caspase-9-isoform-X1-[Callorhinus-ursinus]	XP_039925324.1-caspase-10-like-[Hirundo-rustica]	XP_041878360.1-FAS-associated-death-domain-protein-[Corvus-kubaryi]	XP_028715543.2-LOW-QUALITY-PROTEIN:-TIR-domain-containing-adapter-molecule-1-[Peromyscus-leucopus]	XP_030250648.1-nucleotide-binding-oligomerization-domain-containing-protein-1-isoform-X2-[Sparus-aurata] (2)	XP_028611404.1-nucleotide-binding-oligomerization-domain-containing-protein-2-[Grammomys-surdaster] (2)	XP_028262625.1-interferon-regulatory-factor-6-[Parambassis-ranga]
XP_014854874.1-PREDICTED:-receptor-interacting-serine/threonine-protein-kinase-4-like-isoform-X2-[Poecilia-mexicana]	XP_042836020.1-Z-DNA-binding-protein-1-isoform-X1-[Panthera-tigris] (2)	XP_041506423.1-mixed-lineage-kinase-domain-like-protein-isoform-X2-[Microtus-oregoni]	XP_043990312.1-receptor-interacting-serine/threonine-protein-kinase-1-[Gambusia-affinis]	XP_041625543.1-receptor-interacting-serine/threonine-protein-kinase-2-[Vulpes-lagopus]	XP_031222402.1-receptor-interacting-serine/threonine-protein-kinase-2-isoform-X1-[Mastomys-coucha]		XP_029957477.1-receptor-interacting-serine/threonine-protein-kinase-4-[Salarias-fasciatus]	XP_049655513.1-ankyrin-repeat-and-protein-kinase-domain-containing-protein-1-[Accipiter-gentilis]	XP_032722943.1-caspase-2-isoform-X2-[Lontra-canadensis]	XP_034641566.1-caspase-8-like-isoform-X2-[Trachemys-scripta-elegans]	XP_032249058.1-caspase-9-isoform-X1-[Phoca-vitulina]	XP_042202715.1-caspase-8-[Callorhinchus-milii]	NP_690920.1-FAS-associated-death-domain-protein-[Rattus-norvegicus]	XP_003788814.1-TIR-domain-containing-adapter-molecule-1-[Otolemur-garnettii]	XP_030250650.1-nucleotide-binding-oligomerization-domain-containing-protein-1-isoform-X4-[Sparus-aurata]	XP_031196644.1-nucleotide-binding-oligomerization-domain-containing-protein-2-isoform-X2-[Mastomys-coucha]	XP_041835613.1-interferon-regulatory-factor-6-[Melanotaenia-boesemani]
XP_006273279.1-PREDICTED:-receptor-interacting-serine/threonine-protein-kinase-3-isoform-X1-[Alligator-mississippiensis]	XP_007087104.2-Z-DNA-binding-protein-1-isoform-X4-[Panthera-tigris] (2)	XP_055477445.1-mixed-lineage-kinase-domain-like-protein-[Psammomys-obesus]	XP_015742816.1-receptor-interacting-serine/threonine-protein-kinase-1-isoform-X1-[Python-bivittatus]	XP_040471021.1-receptor-interacting-serine/threonine-protein-kinase-2-like-isoform-X1-[Falco-naumanni]	XP_052392083.1-receptor-interacting-serine/threonine-protein-kinase-2-like-[Carassius-gibelio]		XP_027642255.1-receptor-interacting-serine/threonine-protein-kinase-4-[Falco-peregrinus]	XP_009509039.1-PREDICTED:-ankyrin-repeat-and-protein-kinase-domain-containing-protein-1-[Phalacrocorax-carbo]	XP_004430721.1-PREDICTED:-caspase-2-isoform-X1-[Ceratotherium-simum-simum]	XP_006272609.1-PREDICTED:-caspase-8-[Alligator-mississippiensis]	XP_035956233.1-caspase-9-isoform-X1-[Halichoerus-grypus]	XP_045067960.1-LOW-QUALITY-PROTEIN:-caspase-8-[Coregonus-clupeaformis]	XP_011798139.1-PREDICTED:-FAS-associated-death-domain-protein-[Colobus-angolensis-palliatus]	NP_001266155.1-TIR-domain-containing-adapter-molecule-1-[Pan-paniscus]	XP_026229064.1-nucleotide-binding-oligomerization-domain-containing-protein-1-[Anabas-testudineus]	XP_031196645.1-nucleotide-binding-oligomerization-domain-containing-protein-2-isoform-X3-[Mastomys-coucha] (2)	XP_034022486.1-interferon-regulatory-factor-6-[Thalassophryne-amazonica]
XP_015347410.1-receptor-interacting-serine/threonine-protein-kinase-3-[Marmota-marmota-marmota]	XP_049506530.1-Z-DNA-binding-protein-1-isoform-X1-[Panthera-uncia] (2)	XP_021488182.1-mixed-lineage-kinase-domain-like-protein-isoform-X1-[Meriones-unguiculatus]	XP_004711819.1-receptor-interacting-serine/threonine-protein-kinase-1-[Echinops-telfairi]	XP_051641063.1-receptor-interacting-serine/threonine-protein-kinase-2-isoform-X3-[Manacus-candei]	XP_039926361.1-receptor-interacting-serine/threonine-protein-kinase-2-isoform-X1-[Hirundo-rustica]		XP_008495431.1-receptor-interacting-serine/threonine-protein-kinase-4-[Calypte-anna]	XP_020509357.1-ankyrin-repeat-and-protein-kinase-domain-containing-protein-1-[Labrus-bergylta]	XP_017164697.1-PREDICTED:-caspase-2-isoform-X3-[Poecilia-reticulata]	XP_048284742.1-caspase-8-isoform-X2-[Myodes-glareolus]	XP_045754598.1-caspase-9-isoform-X1-[Mirounga-angustirostris]	XP_010017544.1-PREDICTED:-caspase-10-[Nestor-notabilis]	XP_036443050.1-protein-FADD-[Colossoma-macropomum]	XP_020778302.1-TIR-domain-containing-adapter-molecule-1-[Boleophthalmus-pectinirostris]	XP_030605835.1-nucleotide-binding-oligomerization-domain-containing-protein-1-[Archocentrus-centrarchus]	XP_031196643.1-nucleotide-binding-oligomerization-domain-containing-protein-2-isoform-X1-[Mastomys-coucha]	XP_028302653.1-interferon-regulatory-factor-6-[Gouania-willdenowi]
XP_014884728.1-PREDICTED:-receptor-interacting-serine/threonine-protein-kinase-4-like-isoform-X1-[Poecilia-latipinna]	XP_049506531.1-Z-DNA-binding-protein-1-isoform-X2-[Panthera-uncia] (2)	XP_021488183.1-mixed-lineage-kinase-domain-like-protein-isoform-X2-[Meriones-unguiculatus]	XP_011485212.1-receptor-interacting-serine/threonine-protein-kinase-1-[Oryzias-latipes]	XP_029821059.1-receptor-interacting-serine/threonine-protein-kinase-2-like-[Manacus-vitellinus]	XP_030219055.1-receptor-interacting-serine/threonine-protein-kinase-2-isoform-X1-[Gadus-morhua]		XP_038657381.1-receptor-interacting-serine/threonine-protein-kinase-4-[Scyliorhinus-canicula]	XP_004382571.1-LOW-QUALITY-PROTEIN:-ankyrin-repeat-and-protein-kinase-domain-containing-protein-1-[Trichechus-manatus-latirostris]	XP_021548559.1-caspase-2-[Neomonachus-schauinslandi]	XP_037768418.1-caspase-8-isoform-X1-[Chelonia-mydas]	XP_034875624.1-caspase-9-isoform-X3-[Mirounga-leonina]	XP_015214951.1-PREDICTED:-caspase-8-[Lepisosteus-oculatus]	XP_024430195.2-FAS-associated-death-domain-protein-[Desmodus-rotundus]	XP_050766521.1-TIR-domain-containing-adapter-molecule-1-[Gymnogyps-californianus]	XP_005745790.1-PREDICTED:-nucleotide-binding-oligomerization-domain-containing-protein-1-[Pundamilia-nyererei] (2)	XP_029388204.1-nucleotide-binding-oligomerization-domain-containing-protein-2-[Mus-pahari] (2)	XP_011472937.1-interferon-regulatory-factor-6-[Oryzias-latipes]
XP_029610263.1-receptor-interacting-serine/threonine-protein-kinase-3-like-[Salmo-trutta]	XP_019281997.2-Z-DNA-binding-protein-1-isoform-X2-[Panthera-pardus] (2)	XP_051024917.1-mixed-lineage-kinase-domain-like-protein-[Acomys-russatus]	XP_050826496.1-receptor-interacting-serine/threonine-protein-kinase-1-isoform-X2-[Serinus-canaria]	XP_026168630.1-receptor-interacting-serine/threonine-protein-kinase-2-isoform-X2-[Mastacembelus-armatus]	XP_049709981.1-receptor-interacting-serine/threonine-protein-kinase-2-isoform-X1-[Elephas-maximus-indicus]		XP_025933546.1-receptor-interacting-serine/threonine-protein-kinase-4-[Apteryx-rowi]	XP_027592783.2-ankyrin-repeat-and-protein-kinase-domain-containing-protein-1-[Pipra-filicauda]	XP_010154356.1-PREDICTED:-caspase-2-isoform-X2-[Eurypyga-helias]	XP_034642209.1-caspase-8-like-[Trachemys-scripta-elegans]	XP_034875622.1-caspase-9-isoform-X1-[Mirounga-leonina]	XP_030259607.1-caspase-8-like-isoform-X2-[Sparus-aurata]	XP_017371376.1-FAS-associated-death-domain-protein-[Cebus-imitator]	XP_010221010.1-PREDICTED:-TIR-domain-containing-adapter-molecule-1-[Tinamus-guttatus]	XP_005948197.1-nucleotide-binding-oligomerization-domain-containing-protein-1-[Haplochromis-burtoni]	XP_021026549.1-nucleotide-binding-oligomerization-domain-containing-protein-2-[Mus-caroli] (2)	XP_024126858.1-interferon-regulatory-factor-6-[Oryzias-melastigma]
XP_020671559.1-receptor-interacting-serine/threonine-protein-kinase-3-isoform-X2-[Pogona-vitticeps]	XP_053746086.1-Z-DNA-binding-protein-1-isoform-X1-[Panthera-pardus] (2)	XP_003509723.1-mixed-lineage-kinase-domain-like-protein-[Cricetulus-griseus]	XP_012506821.1-PREDICTED:-receptor-interacting-serine/threonine-protein-kinase-1-[Propithecus-coquereli]	XP_039202674.1-receptor-interacting-serine/threonine-protein-kinase-2-[Crotalus-tigris]	XP_052404091.1-receptor-interacting-serine/threonine-protein-kinase-2-like-isoform-X2-[Carassius-gibelio]		XP_039352961.1-receptor-interacting-serine/threonine-protein-kinase-4-isoform-X1-[Mauremys-reevesii]	XP_036283965.1-ankyrin-repeat-and-protein-kinase-domain-containing-protein-1-[Pipistrellus-kuhlii]	XP_033048335.1-caspase-2-isoform-X2-[Trachypithecus-francoisi]	XP_010197451.1-PREDICTED:-caspase-8-like-[Colius-striatus]	XP_034875623.1-caspase-9-isoform-X2-[Mirounga-leonina]	XP_032866695.2-caspase-10-isoform-X2-[Tyto-alba]	XP_005813719.1-FAS-associated-death-domain-protein-[Xiphophorus-maculatus]	XP_059774690.1-TIR-domain-containing-adapter-molecule-1-[Balaenoptera-ricei]	XP_039890836.1-nucleotide-binding-oligomerization-domain-containing-protein-1-[Simochromis-diagramma]	XP_006531092.1-nucleotide-binding-oligomerization-domain-containing-protein-2-isoform-X3-[Mus-musculus] (2)	XP_053724590.1-interferon-regulatory-factor-6-[Synchiropus-splendidus]
XP_033996984.1-ankyrin-repeat-and-protein-kinase-domain-containing-protein-1-like-isoform-X3-[Trematomus-bernacchii]	XP_042836022.1-Z-DNA-binding-protein-1-isoform-X3-[Panthera-tigris] (2)	XP_027261832.1-mixed-lineage-kinase-domain-like-protein-[Cricetulus-griseus]	XP_044149521.1-receptor-interacting-serine/threonine-protein-kinase-1-isoform-X1-[Bufo-gargarizans]	XP_032078700.1-LOW-QUALITY-PROTEIN:-receptor-interacting-serine/threonine-protein-kinase-2-[Thamnophis-elegans]	XP_033011411.1-receptor-interacting-serine/threonine-protein-kinase-2-isoform-X2-[Lacerta-agilis]		XP_037604565.1-receptor-interacting-serine/threonine-protein-kinase-4-[Sebastes-umbrosus]	XP_034768542.1-ankyrin-repeat-and-protein-kinase-domain-containing-protein-1-like-[Acipenser-ruthenus]	XP_050988011.1-caspase-2-isoform-X2-[Labeo-rohita]	XP_009807896.1-PREDICTED:-caspase-8-[Gavia-stellata]	XP_044769822.1-caspase-9-isoform-X3-[Neomonachus-schauinslandi]	XP_025790969.1-caspase-10-[Puma-concolor]	XP_048119112.1-protein-FADD-isoform-X1-[Alosa-alosa]	XP_015276078.1-PREDICTED:-TIR-domain-containing-adapter-molecule-1-[Gekko-japonicus]	XP_026039157.1-nucleotide-binding-oligomerization-domain-containing-protein-1-[Astatotilapia-calliptera] (2)	XP_036009943.1-nucleotide-binding-oligomerization-domain-containing-protein-2-isoform-X2-[Mus-musculus] (2)	XP_054639618.1-interferon-regulatory-factor-6-[Dunckerocampus-dactyliophorus]
XP_023271102.1-receptor-interacting-serine/threonine-protein-kinase-3-like-[Seriola-lalandi-dorsalis]	XP_019281992.2-Z-DNA-binding-protein-1-isoform-X3-[Panthera-pardus] (2)	XP_051057720.1-mixed-lineage-kinase-domain-like-protein-[Phodopus-roborovskii]	XP_029581308.1-receptor-interacting-serine/threonine-protein-kinase-1-like-isoform-X2-[Salmo-trutta]	XP_046204456.1-receptor-interacting-serine/threonine-protein-kinase-2-like-[Oncorhynchus-gorbuscha]	XP_005517100.1-PREDICTED:-receptor-interacting-serine/threonine-protein-kinase-2-isoform-X1-[Pseudopodoces-humilis]		XP_042811216.1-LOW-QUALITY-PROTEIN:-receptor-interacting-serine/threonine-protein-kinase-4-[Panthera-leo]	XP_043770810.1-LOW-QUALITY-PROTEIN:-ankyrin-repeat-and-protein-kinase-domain-containing-protein-1-[Cervus-elaphus]	XP_026226343.1-caspase-2-isoform-X2-[Anabas-testudineus]	XP_037998058.1-caspase-8-like-[Motacilla-alba-alba]	XP_044769821.1-caspase-9-isoform-X1-[Neomonachus-schauinslandi]	XP_020327817.1-caspase-8-isoform-X2-[Oncorhynchus-kisutch]	XP_027562319.1-FAS-associated-death-domain-protein-[Neopelma-chrysocephalum]	XP_034039523.1-TIR-domain-containing-adapter-molecule-1-isoform-X2-[Thalassophryne-amazonica]	XP_004571362.1-nucleotide-binding-oligomerization-domain-containing-protein-1-[Maylandia-zebra]	NP_665856.2-nucleotide-binding-oligomerization-domain-containing-protein-2-[Mus-musculus] (2)	XP_057911439.1-interferon-regulatory-factor-6-[Doryrhamphus-excisus]
XP_025298572.1-receptor-interacting-serine/threonine-protein-kinase-3-isoform-X6-[Canis-lupus-dingo]	XP_053746087.1-Z-DNA-binding-protein-1-isoform-X4-[Panthera-pardus] (2)	XP_040592723.1-mixed-lineage-kinase-domain-like-protein-[Mesocricetus-auratus]	XP_009324725.1-PREDICTED:-receptor-interacting-serine/threonine-protein-kinase-1-isoform-X2-[Pygoscelis-adeliae]	XP_045661969.1-receptor-interacting-serine/threonine-protein-kinase-2-isoform-X1-[Ursus-americanus]	XP_026168630.1-receptor-interacting-serine/threonine-protein-kinase-2-isoform-X2-[Mastacembelus-armatus]		XP_026129836.1-receptor-interacting-serine/threonine-protein-kinase-4-like-[Carassius-auratus]	XP_032328356.1-ankyrin-repeat-and-protein-kinase-domain-containing-protein-1-[Camelus-ferus]	XP_010832314.1-PREDICTED:-caspase-2-isoform-X2-[Bison-bison-bison]	XP_017400779.1-caspase-8-isoform-X2-[Cebus-imitator]	XP_021539139.1-caspase-9-isoform-X2-[Neomonachus-schauinslandi]	XP_005640587.1-caspase-10-[Canis-lupus-familiaris]	XP_014948972.1-caspase-10-isoform-X1-[Ovis-aries]	XP_017452198.1-TIR-domain-containing-adapter-molecule-1-isoform-X2-[Rattus-norvegicus]	XP_031595336.2-LOW-QUALITY-PROTEIN:-nucleotide-binding-oligomerization-domain-containing-protein-1-[Oreochromis-aureus]	XP_006531091.1-nucleotide-binding-oligomerization-domain-containing-protein-2-isoform-X1-[Mus-musculus]	XP_061778706.1-interferon-regulatory-factor-6-[Nerophis-ophidion]
XP_017655315.1-LOW-QUALITY-PROTEIN:-receptor-interacting-serine/threonine-protein-kinase-3-[Nannospalax-galili]	XP_042786519.1-Z-DNA-binding-protein-1-isoform-X3-[Panthera-leo] (2)	XP_036044342.1-mixed-lineage-kinase-domain-like-protein-[Onychomys-torridus]	XP_045550131.1-receptor-interacting-serine/threonine-protein-kinase-1-isoform-X1-[Salmo-salar]	XP_038825869.1-receptor-interacting-serine/threonine-protein-kinase-2-like-isoform-X2-[Salvelinus-namaycush]	XP_014383921.1-PREDICTED:-receptor-interacting-serine/threonine-protein-kinase-2-[Myotis-brandtii]		XP_036845970.1-receptor-interacting-serine/threonine-protein-kinase-4-[Oncorhynchus-mykiss]	XP_030258703.1-ankyrin-repeat-and-protein-kinase-domain-containing-protein-1-isoform-X1-[Sparus-aurata]	XP_036930866.1-caspase-2-isoform-X3-[Acanthopagrus-latus]	XP_054492393.1-caspase-8-like-isoform-X1-[Agelaius-phoeniceus]	XP_026375570.1-caspase-9-[Ursus-arctos]	XP_048165077.1-caspase-10-isoform-X2-[Corvus-hawaiiensis]	XP_051983157.1-protein-FADD-[Xyrauchen-texanus]	XP_036255318.1-TIR-domain-containing-adapter-molecule-1-[Molothrus-ater]	XP_003446247.1-nucleotide-binding-oligomerization-domain-containing-protein-1-isoform-X1-[Oreochromis-niloticus] (2)	XP_051024679.1-nucleotide-binding-oligomerization-domain-containing-protein-2-isoform-X2-[Acomys-russatus] (2)	XP_061878936.1-interferon-regulatory-factor-6-[Entelurus-aequoreus]
XP_029552354.1-receptor-interacting-serine/threonine-protein-kinase-3-like-[Salmo-trutta]	XP_042786518.1-Z-DNA-binding-protein-1-isoform-X2-[Panthera-leo] (2)	XP_052585137.1-mixed-lineage-kinase-domain-like-protein-isoform-X2-[Peromyscus-californicus-insignis]	XP_004408463.1-PREDICTED:-receptor-interacting-serine/threonine-protein-kinase-1-[Odobenus-rosmarus-divergens]	XP_005563718.2-receptor-interacting-serine/threonine-protein-kinase-2-isoform-X1-[Macaca-fascicularis]	XP_027537822.1-receptor-interacting-serine/threonine-protein-kinase-2-isoform-X2-[Neopelma-chrysocephalum]		XP_044106829.1-receptor-interacting-serine/threonine-protein-kinase-4-[Neogale-vison]	XP_051895676.1-LOW-QUALITY-PROTEIN:-ankyrin-repeat-and-protein-kinase-domain-containing-protein-1-[Pristis-pectinata]	XP_054477597.1-caspase-2-isoform-X2-[Anoplopoma-fimbria]	XP_004378277.1-caspase-8-isoform-X1-[Trichechus-manatus-latirostris]	XP_008692916.2-caspase-9-isoform-X2-[Ursus-maritimus]	XP_051259013.1-caspase-8-[Dicentrarchus-labrax]	XP_046713684.1-protein-FADD-[Silurus-meridionalis]	XP_004378500.1-TIR-domain-containing-adapter-molecule-1-[Trichechus-manatus-latirostris]	XP_019220560.1-nucleotide-binding-oligomerization-domain-containing-protein-1-isoform-X2-[Oreochromis-niloticus]	XP_021512520.1-nucleotide-binding-oligomerization-domain-containing-protein-2-isoform-X1-[Meriones-unguiculatus] (2)	XP_061788317.1-interferon-regulatory-factor-6-like-[Nerophis-lumbriciformis]
XP_015241739.1-PREDICTED:-receptor-interacting-serine/threonine-protein-kinase-3-like-isoform-X2-[Cyprinodon-variegatus]	XP_042786517.1-Z-DNA-binding-protein-1-isoform-X1-[Panthera-leo] (2)	XP_052585135.1-mixed-lineage-kinase-domain-like-protein-isoform-X1-[Peromyscus-californicus-insignis]	XP_022614035.1-receptor-interacting-serine/threonine-protein-kinase-1-isoform-X1-[Seriola-dumerili]	XP_032876061.1-receptor-interacting-serine/threonine-protein-kinase-2-isoform-X1-[Amblyraja-radiata]	XP_036686317.1-receptor-interacting-serine/threonine-protein-kinase-2-isoform-X1-[Balaenoptera-musculus]		XP_005514944.1-receptor-interacting-serine/threonine-protein-kinase-4,-partial-[Columba-livia]	XP_048017626.1-ankyrin-repeat-and-protein-kinase-domain-containing-protein-1-isoform-X2-[Megalobrama-amblycephala]	XP_016012710.1-caspase-2-isoform-X1-[Rousettus-aegyptiacus]	XP_037857685.1-caspase-8-isoform-X4-[Chlorocebus-sabaeus]	XP_045630651.1-caspase-9-isoform-X2-[Ursus-americanus]	XP_036821779.1-caspase-8-isoform-X1-[Oncorhynchus-mykiss]	XP_020040986.1-FAS-associated-death-domain-protein-[Castor-canadensis]	XP_060640949.1-TIR-domain-containing-adapter-molecule-1-[Anolis-sagrei-ordinatus]	XP_047455003.1-nucleotide-binding-oligomerization-domain-containing-protein-1-isoform-X1-[Mugil-cephalus]	XP_021512513.1-nucleotide-binding-oligomerization-domain-containing-protein-2-isoform-X1-[Meriones-unguiculatus]	XP_061689160.1-interferon-regulatory-factor-6-[Syngnathoides-biaculeatus]
XP_023439442.1-receptor-interacting-serine/threonine-protein-kinase-3-isoform-X1-[Dasypus-novemcinctus]	XP_032758346.1-Z-DNA-binding-protein-1,-partial-[Rattus-rattus] (2)	XP_028748613.1-mixed-lineage-kinase-domain-like-protein-[Peromyscus-leucopus]	XP_011938832.1-PREDICTED:-receptor-interacting-serine/threonine-protein-kinase-1-isoform-X1-[Cercocebus-atys]	XP_038574348.1-receptor-interacting-serine/threonine-protein-kinase-2-like-isoform-X2-[Micropterus-salmoides]	XP_004598160.1-receptor-interacting-serine/threonine-protein-kinase-2-[Ochotona-princeps]		XP_035240079.1-receptor-interacting-serine/threonine-protein-kinase-4-like-isoform-X1-[Anguilla-anguilla]	XP_023500601.1-ankyrin-repeat-and-protein-kinase-domain-containing-protein-1-isoform-X1-[Equus-caballus]	XP_029334682.1-caspase-2-isoform-X2-[Mus-caroli]	XP_009442260.1-caspase-8-isoform-X4-[Pan-troglodytes]	XP_040501746.1-caspase-9-isoform-X1-[Ursus-maritimus]	XP_045907789.1-caspase-8-like-isoform-X1-[Micropterus-dolomieu]	XP_008308078.1-FAS-associated-death-domain-protein-[Cynoglossus-semilaevis]	XP_009934696.1-PREDICTED:-TIR-domain-containing-adapter-molecule-1-[Opisthocomus-hoazin]	XP_062278290.1-nucleotide-binding-oligomerization-domain-containing-protein-1-[Scomber-scombrus]	XP_055477495.1-nucleotide-binding-oligomerization-domain-containing-protein-2-isoform-X2-[Psammomys-obesus]	XP_061639411.1-interferon-regulatory-factor-6-[Phyllopteryx-taeniolatus]
XP_017317252.1-ankyrin-repeat-and-protein-kinase-domain-containing-protein-1-isoform-X2-[Ictalurus-punctatus]	NP_598248.1-Z-DNA-binding-protein-1-[Rattus-norvegicus] (2)	XP_028746937.1-mixed-lineage-kinase-domain-like-protein-[Peromyscus-leucopus]	XP_050795930.1-receptor-interacting-serine/threonine-protein-kinase-1-isoform-X4-[Gopherus-flavomarginatus]	XP_012960735.2-receptor-interacting-serine/threonine-protein-kinase-2-isoform-X2-[Anas-platyrhynchos]	XP_015475265.1-receptor-interacting-serine/threonine-protein-kinase-2-isoform-X3-[Parus-major]		XP_037322679.1-receptor-interacting-serine/threonine-protein-kinase-4-[Pungitius-pungitius]	XP_027755495.1-ankyrin-repeat-and-protein-kinase-domain-containing-protein-1-isoform-X1-[Empidonax-traillii]	XP_025785049.1-caspase-2-isoform-X2-[Puma-concolor]	XP_054200094.1-caspase-8-isoform-X7-[Homo-sapiens]	XP_045630652.1-caspase-9-isoform-X3-[Ursus-americanus]	XP_039861378.1-caspase-8-[Simochromis-diagramma]	XP_038958354.1-FAS-associated-death-domain-protein-isoform-X1-[Rattus-norvegicus]	XP_005405837.1-PREDICTED:-TIR-domain-containing-adapter-molecule-1-[Chinchilla-lanigera]	XP_053182751.1-nucleotide-binding-oligomerization-domain-containing-protein-1-[Scomber-japonicus] (2)	XP_055477494.1-nucleotide-binding-oligomerization-domain-containing-protein-2-isoform-X1-[Psammomys-obesus]	XP_061543326.1-interferon-regulatory-factor-6-[Phycodurus-eques]
XP_003901703.2-receptor-interacting-serine/threonine-protein-kinase-3-[Papio-anubis]	NP_067369.2-Z-DNA-binding-protein-1-isoform-1-[Mus-musculus] (2)	XP_006974218.1-mixed-lineage-kinase-domain-like-protein-[Peromyscus-maniculatus-bairdii]	XP_028703710.1-receptor-interacting-serine/threonine-protein-kinase-1-isoform-X1-[Macaca-mulatta]	XP_033507424.1-receptor-interacting-serine/threonine-protein-kinase-2-like-isoform-X2-[Epinephelus-lanceolatus]	XP_047224753.1-receptor-interacting-serine/threonine-protein-kinase-2-like-isoform-X1-[Girardinichthys-multiradiatus]		XP_030185120.1-receptor-interacting-serine/threonine-protein-kinase-4-isoform-X1-[Lynx-canadensis]	XP_051966386.1-ankyrin-repeat-and-protein-kinase-domain-containing-protein-1-like-[Xyrauchen-texanus]	XP_032374604.1-caspase-2-isoform-X7-[Etheostoma-spectabile]	XP_019410047.1-PREDICTED:-caspase-8-like-isoform-X2-[Crocodylus-porosus]	XP_045630650.1-caspase-9-isoform-X1-[Ursus-americanus]	XP_008118736.1-PREDICTED:-caspase-10-isoform-X2-[Anolis-carolinensis]	XP_055146171.1-caspase-10-isoform-X5-[Symphalangus-syndactylus]	XP_012810441.2-TIR-domain-containing-adapter-molecule-1-isoform-X3-[Xenopus-tropicalis]	XP_043889435.1-nucleotide-binding-oligomerization-domain-containing-protein-1-[Solea-senegalensis] (2)	XP_020747226.1-nucleotide-binding-oligomerization-domain-containing-protein-2-isoform-X3-[Odocoileus-virginianus-texanus]	XP_057702942.1-interferon-regulatory-factor-6-isoform-X3-[Corythoichthys-intestinalis]
XP_007545716.1-PREDICTED:-receptor-interacting-serine/threonine-protein-kinase-3-like-isoform-X3-[Poecilia-formosa]	XP_021007300.1-Z-DNA-binding-protein-1-isoform-X1-[Mus-caroli] (2)	XP_027751488.1-mixed-lineage-kinase-domain-like-protein-isoform-X1-[Empidonax-traillii]	XP_012397135.2-receptor-interacting-serine/threonine-protein-kinase-1-isoform-X1-[Sarcophilus-harrisii]	XP_018532736.1-receptor-interacting-serine/threonine-protein-kinase-2-isoform-X1-[Lates-calcarifer]	XP_045000629.1-receptor-interacting-serine/threonine-protein-kinase-2-isoform-X1-[Jaculus-jaculus]		XP_026529780.1-receptor-interacting-serine/threonine-protein-kinase-4-[Notechis-scutatus]	XP_023817731.1-ankyrin-repeat-and-protein-kinase-domain-containing-protein-1-[Oryzias-latipes]	XP_010154355.1-PREDICTED:-caspase-2-isoform-X1-[Eurypyga-helias]	XP_044888402.1-caspase-8-like-isoform-X2-[Mauremys-mutica]	XP_044093154.1-caspase-9-isoform-X1-[Neogale-vison]	XP_026170395.1-caspase-8-like-[Mastacembelus-armatus]	XP_007231892.3-protein-FADD-[Astyanax-mexicanus]	XP_010120978.1-PREDICTED:-TIR-domain-containing-adapter-molecule-1-[Chlamydotis-macqueenii]	XP_058503420.1-nucleotide-binding-oligomerization-domain-containing-protein-1-[Solea-solea]	XP_020747224.1-nucleotide-binding-oligomerization-domain-containing-protein-2-isoform-X1-[Odocoileus-virginianus-texanus] (2)	XP_057702939.1-interferon-regulatory-factor-6-isoform-X1-[Corythoichthys-intestinalis]
XP_019518578.1-PREDICTED:-receptor-interacting-serine/threonine-protein-kinase-3-isoform-X3-[Hipposideros-armiger]	XP_052040405.1-Z-DNA-binding-protein-1-isoform-X7-[Apodemus-sylvaticus] (2)	XP_025963144.1-mixed-lineage-kinase-domain-like-protein-[Dromaius-novaehollandiae]	XP_015282662.1-PREDICTED:-receptor-interacting-serine/threonine-protein-kinase-1-isoform-X1-[Gekko-japonicus]	XP_036788456.1-receptor-interacting-serine/threonine-protein-kinase-2-isoform-X1-[Manis-pentadactyla]	XP_014820950.1-PREDICTED:-receptor-interacting-serine/threonine-protein-kinase-2-isoform-X4-[Calidris-pugnax]		XP_014736141.1-PREDICTED:-receptor-interacting-serine/threonine-protein-kinase-4-[Sturnus-vulgaris]	XP_037533722.1-ankyrin-repeat-and-protein-kinase-domain-containing-protein-1-[Nematolebias-whitei]	NP_001081404.1-caspase-2-L-homeolog-[Xenopus-laevis]	XP_010288743.1-PREDICTED:-caspase-8-like-[Phaethon-lepturus]	XP_044093155.1-caspase-9-isoform-X2-[Neogale-vison]	XP_046177818.1-caspase-8-like-[Oncorhynchus-gorbuscha]	XP_053244641.1-FAS-associated-death-domain-protein-isoform-X2-[Podarcis-raffonei]	XP_027015434.2-TIR-domain-containing-adapter-molecule-1-[Tachysurus-fulvidraco]	XP_044214303.1-nucleotide-binding-oligomerization-domain-containing-protein-1-isoform-X1-[Thunnus-albacares] (2)	XP_060994462.1-nucleotide-binding-oligomerization-domain-containing-protein-2-isoform-X3-[Dama-dama]	XP_019736317.1-PREDICTED:-interferon-regulatory-factor-6-[Hippocampus-comes]
XP_034412748.1-receptor-interacting-serine/threonine-protein-kinase-3-isoform-X2-[Cyclopterus-lumpus]	XP_052040404.1-Z-DNA-binding-protein-1-isoform-X6-[Apodemus-sylvaticus] (2)	XP_013808065.1-PREDICTED:-mixed-lineage-kinase-domain-like-protein-[Apteryx-mantelli-mantelli]	XP_028449746.1-receptor-interacting-serine/threonine-protein-kinase-1-[Perca-flavescens]	XP_028283896.1-receptor-interacting-serine/threonine-protein-kinase-2-[Parambassis-ranga]	XP_017681969.1-PREDICTED:-receptor-interacting-serine/threonine-protein-kinase-2-isoform-X1-[Lepidothrix-coronata]		XP_038009080.1-receptor-interacting-serine/threonine-protein-kinase-4-[Motacilla-alba-alba]	XP_005915890.1-ankyrin-repeat-and-protein-kinase-domain-containing-protein-1-[Haplochromis-burtoni]	XP_022056851.2-caspase-2-isoform-X1-[Acanthochromis-polyacanthus]	XP_010013970.1-PREDICTED:-caspase-8-like,-partial-[Nestor-notabilis]	XP_044919730.1-caspase-9-isoform-X3-[Mustela-putorius-furo]	XP_049743771.1-caspase-10-isoform-X6-[Elephas-maximus-indicus]	NP_001089017.1-Fas-associated-via-death-domain-S-homeolog-[Xenopus-laevis]	XP_044223920.1-TIR-domain-containing-adapter-molecule-1-[Thunnus-albacares]	XP_042281051.1-nucleotide-binding-oligomerization-domain-containing-protein-1-isoform-X1-[Thunnus-maccoyii]	XP_060994461.1-nucleotide-binding-oligomerization-domain-containing-protein-2-isoform-X2-[Dama-dama] (2)	XP_051932793.1-interferon-regulatory-factor-6-[Hippocampus-zosterae]
XP_040017874.1-receptor-interacting-serine/threonine-protein-kinase-3-like-isoform-X1-[Gasterosteus-aculeatus-aculeatus]	XP_052040402.1-Z-DNA-binding-protein-1-isoform-X4-[Apodemus-sylvaticus] (2)	XP_025944378.1-mixed-lineage-kinase-domain-like-protein-[Apteryx-rowi]	XP_014796222.1-PREDICTED:-receptor-interacting-serine/threonine-protein-kinase-1-[Calidris-pugnax]	XP_008157084.1-receptor-interacting-serine/threonine-protein-kinase-2-isoform-X1-[Eptesicus-fuscus]	XP_021243367.1-receptor-interacting-serine/threonine-protein-kinase-2-[Numida-meleagris]		XP_036300224.1-receptor-interacting-serine/threonine-protein-kinase-4-isoform-X1-[Pipistrellus-kuhlii]	XP_032694304.1-LOW-QUALITY-PROTEIN:-ankyrin-repeat-and-protein-kinase-domain-containing-protein-1-[Lontra-canadensis]	XP_051499509.1-caspase-2-isoform-X1-[Apus-apus]	XP_044888406.1-caspase-8-like-isoform-X2-[Mauremys-mutica]	XP_004741476.1-caspase-9-isoform-X1-[Mustela-putorius-furo]	XP_005723578.1-PREDICTED:-caspase-8-like-isoform-X1-[Pundamilia-nyererei]	XP_029353924.1-FAS-associated-death-domain-protein-like-isoform-X1-[Echeneis-naucrates]	XP_005281227.1-TIR-domain-containing-adapter-molecule-1-[Chrysemys-picta-bellii]	XP_035485564.2-nucleotide-binding-oligomerization-domain-containing-protein-1-isoform-X1-[Scophthalmus-maximus]	XP_060994460.1-nucleotide-binding-oligomerization-domain-containing-protein-2-isoform-X1-[Dama-dama] (2)	XP_061147685.1-interferon-regulatory-factor-6-[Syngnathus-typhle]
XP_007180906.2-LOW-QUALITY-PROTEIN:-receptor-interacting-serine/threonine-protein-kinase-3-[Balaenoptera-acutorostrata-scammoni]	XP_052040401.1-Z-DNA-binding-protein-1-isoform-X3-[Apodemus-sylvaticus] (2)	XP_010209292.1-PREDICTED:-LOW-QUALITY-PROTEIN:-mixed-lineage-kinase-domain-like-protein-[Tinamus-guttatus]	XP_039766899.1-receptor-interacting-serine/threonine-protein-kinase-1-like-isoform-X2-[Ornithorhynchus-anatinus]	XP_041742835.2-receptor-interacting-serine/threonine-protein-kinase-2-isoform-X2-[Coregonus-clupeaformis]	XP_049675189.1-receptor-interacting-serine/threonine-protein-kinase-2-isoform-X1-[Accipiter-gentilis]		XP_029547036.1-receptor-interacting-serine/threonine-protein-kinase-4-like-[Salmo-trutta]	XP_003642663.4-ankyrin-repeat-and-protein-kinase-domain-containing-protein-1-[Gallus-gallus]	XP_007249871.3-caspase-2-isoform-X4-[Astyanax-mexicanus]	XP_040853808.1-caspase-8-like-isoform-X1-[Ochotona-curzoniae]	XP_032217579.1-caspase-9-isoform-X2-[Mustela-erminea]	XP_015281003.1-PREDICTED:-caspase-10-like-[Gekko-japonicus]	XP_009895797.1-FAS-associated-death-domain-protein-[Dryobates-pubescens]	XP_029607373.1-TIR-domain-containing-adapter-molecule-1-like-[Salmo-trutta]	XP_035485565.2-nucleotide-binding-oligomerization-domain-containing-protein-1-isoform-X2-[Scophthalmus-maximus]	XP_020747225.1-nucleotide-binding-oligomerization-domain-containing-protein-2-isoform-X2-[Odocoileus-virginianus-texanus] (2)	XP_049589551.1-interferon-regulatory-factor-6-[Syngnathus-scovelli]
XP_033996990.1-receptor-interacting-serine/threonine-protein-kinase-4-like-isoform-X3-[Trematomus-bernacchii]	XP_052040403.1-Z-DNA-binding-protein-1-isoform-X5-[Apodemus-sylvaticus] (2)	XP_025890122.1-mixed-lineage-kinase-domain-like-protein-[Nothoprocta-perdicaria]	XP_040403958.1-receptor-interacting-serine/threonine-protein-kinase-1-[Cygnus-olor]	XP_047409245.1-receptor-interacting-serine/threonine-protein-kinase-2-[Sciurus-carolinensis]	XP_020024864.1-receptor-interacting-serine/threonine-protein-kinase-2-isoform-X1-[Castor-canadensis]		XP_020341065.1-receptor-interacting-serine/threonine-protein-kinase-4-isoform-X1-[Oncorhynchus-kisutch]	XP_027135913.1-ankyrin-repeat-and-protein-kinase-domain-containing-protein-1-[Larimichthys-crocea]	XP_030327702.1-caspase-2-isoform-X5-[Strigops-habroptila]	XP_036712912.1-caspase-8-isoform-X2-[Balaenoptera-musculus]	XP_032217581.1-caspase-9-isoform-X4-[Mustela-erminea]	XP_048165076.1-caspase-10-isoform-X1-[Corvus-hawaiiensis]	XP_046240295.1-protein-FADD-[Scatophagus-argus]	XP_051033555.1-TIR-domain-containing-adapter-molecule-1-isoform-X1-[Phodopus-roborovskii]	XP_010737413.3-nucleotide-binding-oligomerization-domain-containing-protein-1-isoform-X1-[Larimichthys-crocea]	XP_043292392.1-nucleotide-binding-oligomerization-domain-containing-protein-2-isoform-X2-[Cervus-canadensis] (2)	XP_037106915.1-interferon-regulatory-factor-6-isoform-X1-[Syngnathus-acus]
XP_028261634.1-receptor-interacting-serine/threonine-protein-kinase-3-like-[Parambassis-ranga]	XP_052040400.1-Z-DNA-binding-protein-1-isoform-X2-[Apodemus-sylvaticus] (2)	XP_057271189.1-LOW-QUALITY-PROTEIN:-mixed-lineage-kinase-domain-like-protein-[Pezoporus-wallicus]	XP_033993915.1-receptor-interacting-serine/threonine-protein-kinase-1-[Trematomus-bernacchii]	XP_026569942.1-receptor-interacting-serine/threonine-protein-kinase-2-like-[Pseudonaja-textilis]	XP_034410445.1-receptor-interacting-serine/threonine-protein-kinase-2-like-isoform-X2-[Cyclopterus-lumpus]		XP_018104414.1-receptor-interacting-serine/threonine-protein-kinase-4-[Xenopus-laevis]	XP_031646276.1-ankyrin-repeat-and-protein-kinase-domain-containing-protein-1-[Oncorhynchus-kisutch]	XP_021582907.1-caspase-2-isoform-X4-[Ictidomys-tridecemlineatus]	XP_054236987.1-caspase-8-like-isoform-X3-[Indicator-indicator]	XP_032719368.1-caspase-9-isoform-X2-[Lontra-canadensis]	XP_034417174.1-caspase-8-isoform-X1-[Cyclopterus-lumpus]	XP_012670195.1-protein-FADD-[Clupea-harengus]	XP_010965043.1-TIR-domain-containing-adapter-molecule-1-[Camelus-bactrianus]	XP_019946646.1-PREDICTED:-nucleotide-binding-oligomerization-domain-containing-protein-1-[Paralichthys-olivaceus]	XP_043292388.1-nucleotide-binding-oligomerization-domain-containing-protein-2-isoform-X1-[Cervus-canadensis] (2)	XP_025776784.1-interferon-regulatory-factor-6-[Puma-concolor]
XP_031678674.1-receptor-interacting-serine/threonine-protein-kinase-3-isoform-X1-[Oncorhynchus-kisutch]	XP_052040399.1-Z-DNA-binding-protein-1-isoform-X1-[Apodemus-sylvaticus] (2)	XP_010013466.1-PREDICTED:-LOW-QUALITY-PROTEIN:-mixed-lineage-kinase-domain-like-protein,-partial-[Nestor-notabilis]	XP_024408086.1-receptor-interacting-serine/threonine-protein-kinase-1-isoform-X1-[Desmodus-rotundus]	XP_010286306.1-PREDICTED:-receptor-interacting-serine/threonine-protein-kinase-2-like-[Phaethon-lepturus]	XP_008253935.1-receptor-interacting-serine/threonine-protein-kinase-2-isoform-X1-[Oryctolagus-cuniculus]		XP_036239324.1-receptor-interacting-serine/threonine-protein-kinase-4-[Molothrus-ater]	XP_026892332.1-ankyrin-repeat-and-protein-kinase-domain-containing-protein-1-isoform-X2-[Acinonyx-jubatus]	XP_051030624.1-caspase-2-[Phodopus-roborovskii]	XP_055146189.1-caspase-8-isoform-X2-[Symphalangus-syndactylus]	XP_032719367.1-caspase-9-isoform-X1-[Lontra-canadensis]	XP_041057692.1-caspase-8-like-isoform-X1-[Carcharodon-carcharias]	XP_053836163.1-FAS-associated-death-domain-protein-[Vidua-macroura]	XP_026307783.1-TIR-domain-containing-adapter-molecule-1-[Piliocolobus-tephrosceles]	XP_056235941.1-nucleotide-binding-oligomerization-domain-containing-protein-1-isoform-X1-[Seriola-aureovittata] (2)	XP_043754362.1-nucleotide-binding-oligomerization-domain-containing-protein-2-isoform-X2-[Cervus-elaphus]	XP_007164036.1-interferon-regulatory-factor-6-isoform-X2-[Balaenoptera-acutorostrata]
XP_016408761.1-PREDICTED:-receptor-interacting-serine/threonine-protein-kinase-3-like-[Sinocyclocheilus-rhinocerous]	XP_031228766.1-Z-DNA-binding-protein-1-isoform-X1-[Mastomys-coucha] (2)	XP_013032201.2-mixed-lineage-kinase-domain-like-protein-isoform-X3-[Anser-cygnoides]	XP_008587230.1-PREDICTED:-receptor-interacting-serine/threonine-protein-kinase-1-isoform-X2-[Galeopterus-variegatus]	XP_016358819.1-PREDICTED:-receptor-interacting-serine/threonine-protein-kinase-2-like-[Sinocyclocheilus-anshuiensis]	XP_006537740.1-receptor-interacting-serine/threonine-protein-kinase-2-isoform-X1-[Mus-musculus]		XP_040038828.1-LOW-QUALITY-PROTEIN:-receptor-interacting-serine/threonine-protein-kinase-4-[Gasterosteus-aculeatus-aculeatus]	XP_027029851.2-ankyrin-repeat-and-protein-kinase-domain-containing-protein-1-[Tachysurus-fulvidraco]	XP_044216083.1-caspase-2-isoform-X9-[Thunnus-albacares]	XP_047401953.1-caspase-8-isoform-X4-[Sciurus-carolinensis]	XP_045878021.1-caspase-9-isoform-X2-[Meles-meles]	XP_030309635.1-caspase-10-[Calypte-anna]	XP_010780604.1-PREDICTED:-FAS-associated-death-domain-protein-[Notothenia-coriiceps]	XP_014840262.1-PREDICTED:-TIR-domain-containing-adapter-molecule-1-like-[Poecilia-mexicana]	XP_022606518.1-nucleotide-binding-oligomerization-domain-containing-protein-1-[Seriola-dumerili]	XP_043754359.1-nucleotide-binding-oligomerization-domain-containing-protein-2-isoform-X1-[Cervus-elaphus] (2)	XP_023610570.1-interferon-regulatory-factor-6-isoform-X4-[Myotis-lucifugus]
XP_030395406.1-receptor-interacting-serine/threonine-protein-kinase-3-isoform-X1-[Gopherus-evgoodei]	XP_031228768.1-Z-DNA-binding-protein-1-isoform-X2-[Mastomys-coucha] (2)	XP_047934651.1-mixed-lineage-kinase-domain-like-protein-isoform-X1-[Anser-cygnoides]	XP_009869166.1-PREDICTED:-receptor-interacting-serine/threonine-protein-kinase-1-[Apaloderma-vittatum]	XP_012499112.1-PREDICTED:-receptor-interacting-serine/threonine-protein-kinase-2-[Propithecus-coquereli]	XP_022533572.1-receptor-interacting-serine/threonine-protein-kinase-2-[Astyanax-mexicanus]		XP_018426314.1-PREDICTED:-receptor-interacting-serine/threonine-protein-kinase-4-[Nanorana-parkeri]	XP_034460785.1-ankyrin-repeat-and-protein-kinase-domain-containing-protein-1-[Hippoglossus-hippoglossus]	XP_026862527.2-caspase-2-isoform-X2-[Electrophorus-electricus]	XP_045874978.1-caspase-8-isoform-X1-[Meles-meles]	XP_045878014.1-caspase-9-isoform-X1-[Meles-meles]	XP_057191977.1-caspase-8-isoform-X2-[Triplophysa-rosa]	XP_033484412.1-FAS-associated-death-domain-protein-[Epinephelus-lanceolatus]	XP_031711243.1-TIR-domain-containing-adapter-molecule-1-like-[Anarrhichthys-ocellatus]	XP_040899312.1-nucleotide-binding-oligomerization-domain-containing-protein-1-[Toxotes-jaculatrix]	XP_040109388.1-nucleotide-binding-oligomerization-domain-containing-protein-2-isoform-X1-[Oryx-dammah] (2)	XP_023556953.1-interferon-regulatory-factor-6-[Octodon-degus]
XP_008172712.1-receptor-interacting-serine/threonine-protein-kinase-3-[Chrysemys-picta-bellii]	XP_034351732.1-Z-DNA-binding-protein-1-isoform-X2-[Arvicanthis-niloticus] (2)	XP_047934653.1-mixed-lineage-kinase-domain-like-protein-isoform-X2-[Anser-cygnoides]	XP_004043243.3-receptor-interacting-serine/threonine-protein-kinase-1-isoform-X1-[Gorilla-gorilla-gorilla]	XP_041751627.2-receptor-interacting-serine/threonine-protein-kinase-2-isoform-X1-[Coregonus-clupeaformis]	XP_041751628.2-receptor-interacting-serine/threonine-protein-kinase-2-isoform-X2-[Coregonus-clupeaformis]		XP_009889676.1-PREDICTED:-receptor-interacting-serine/threonine-protein-kinase-4-[Charadrius-vociferus]	XP_006972425.2-ankyrin-repeat-and-protein-kinase-domain-containing-protein-1-isoform-X2-[Peromyscus-maniculatus-bairdii]	XP_054582317.1-caspase-2-isoform-X3-[Eptesicus-fuscus]	XP_006153097.1-caspase-8-isoform-X1-[Tupaia-chinensis]	XP_045878026.1-caspase-9-isoform-X3-[Meles-meles]	XP_028831454.1-caspase-8-like-[Denticeps-clupeoides]	XP_030056600.1-FAS-associated-death-domain-protein-[Microcaecilia-unicolor]	XP_007488996.1-TIR-domain-containing-adapter-molecule-1-[Monodelphis-domestica]	XP_018521171.1-nucleotide-binding-oligomerization-domain-containing-protein-1-isoform-X1-[Lates-calcarifer]	XP_040109390.1-nucleotide-binding-oligomerization-domain-containing-protein-2-isoform-X2-[Oryx-dammah] (2)	XP_040080142.1-LOW-QUALITY-PROTEIN:-interferon-regulatory-factor-6-like-[Oryx-dammah]
XP_044039001.1-receptor-interacting-serine/threonine-protein-kinase-3-[Siniperca-chuatsi]	XP_028625494.1-Z-DNA-binding-protein-1-isoform-X2-[Grammomys-surdaster] (2)	XP_035192831.1-mixed-lineage-kinase-domain-like-protein-[Oxyura-jamaicensis]	XP_042695638.1-receptor-interacting-serine/threonine-protein-kinase-1-isoform-X2-[Centrocercus-urophasianus]	XP_009981064.1-PREDICTED:-receptor-interacting-serine/threonine-protein-kinase-2-like-[Tauraco-erythrolophus]	XP_002939201.2-receptor-interacting-serine/threonine-protein-kinase-2-isoform-X1-[Xenopus-tropicalis]		XP_046162940.1-receptor-interacting-serine/threonine-protein-kinase-4-like-[Oncorhynchus-gorbuscha]	XP_003764266.1-ankyrin-repeat-and-protein-kinase-domain-containing-protein-1-[Sarcophilus-harrisii]	XP_047418181.1-caspase-2-isoform-X2-[Sciurus-carolinensis]	XP_054686691.1-caspase-8-isoform-X1-[Grus-americana]	XP_047583736.1-caspase-9-isoform-X1-[Lutra-lutra]	XP_033869583.1-caspase-8-like-isoform-X1-[Acipenser-ruthenus]	XP_010114192.1-PREDICTED:-LOW-QUALITY-PROTEIN:-FAS-associated-death-domain-protein,-partial-[Chlamydotis-macqueenii]	XP_025717171.1-TIR-domain-containing-adapter-molecule-1-[Callorhinus-ursinus]	XP_039973821.1-nucleotide-binding-oligomerization-domain-containing-protein-1-isoform-X1-[Xiphias-gladius]	XP_042087539.1-nucleotide-binding-oligomerization-domain-containing-protein-2-isoform-X5-[Ovis-aries] (2)	XP_042101187.1-LOW-QUALITY-PROTEIN:-interferon-regulatory-factor-6-like-[Ovis-aries]
[truncated: 1,139 more rows]
