# Supplementary material for: Evolutionary and functional analyses reveal a role for the RHIM in tuning RIPK3 activity across vertebrates
Source: eLife. 2025 May 28;13:RP102301. doi: 10.7554/eLife.102301 (PMC12119088; doi:10.7554/eLife.102301)
Supplement: Supplementary file 6. [file elife-102301-supp6.xlsx]

## Sheet: Sheet1
Protein of interest	Outgroup
RIPK1-5	MAPK kinase kinase 7
ZBP1	ADAR
MLKL	MAPK kinase kinase 9-12
TRIF	TIR domain-containing adapter molecule 2
FADD	CFLAR, CRADD
CASP8/10	CASP2, CASP9, CFLAR
NOD1/2	NLRC3, NLRC3-like
IRF6	IRF 3-5, 7-10
