# Supplementary material for: Evolutionary and functional analyses reveal a role for the RHIM in tuning RIPK3 activity across vertebrates
Source: eLife. 2025 May 28;13:RP102301. doi: 10.7554/eLife.102301 (PMC12119088; doi:10.7554/eLife.102301)
Supplement: Supplementary file 7. [file elife-102301-supp7.xlsx]

## Sheet: Sheet1
					Reptile		ZBP1	CASP8
		Alligator mississippiensis			Crocodilians (Crocodilia)	American alligator (Alligator mississippiensis)	Yes	Yes
		Alligator sinensis				Chinese alligator (Alligator sinensis)	Yes	Yes
		Crocodylus porosus				Saltwater crocodile (Crocadylus porosus)	Yes	Yes
		Gavialis gangeticus				Gharial (Gavialis gangeticus)	Yes	Yes
		Caretta caretta			Turtles & kin (Testudines)	Loggerhead sea turtle (Caretta caretta)	Yes	Yes
		Chelonia mydas				Green sea turtle (Chelonia mydas)	Yes	Yes
		Chelonoidis abingdonii				Pinta island tortoise (Chelonoidis abingdonii)	Yes	Yes
		Chrysemys picta bellii				Painted turtle (Chrysemys picta bellii)	Yes	Yes
		Dermochelys coriacea				Leatherback sea turtle (Dermochelys coriacea)	Yes	Yes
		Gopherus evgoodei				Goode's thornscrub tortoise (Gopherus evgoodei)	Yes	Yes
		Gopherus flavomarginatus				Bolson tortoise (Gopherus flavomarginatus)	Yes	Yes
		Mauremys mutica				Yellow pond turtle (Mauremys mutica)	Yes	Yes
		Mauremys reevesii				Chinese pond turtle (Mauremys reevesii)	Yes	Yes
		Pelodiscus sinensis				Chinese softshell turtle (Pelodiscus sinensis)	Yes	Yes
		Terrapene carolina triunguis				Three-toed box turtle (Terrapene carolina triunguis)	Yes	Yes
		Trachemys scripta elegans				Red eared slider (Trachemys scripta elegans)	Yes	Yes
		Anolis carolinensis			Snakes & lizards (Squamata)	Green anole (Anolis carolinensis)	No	No
		Crotalus tigris				Tiger rattlesnake (Crotalus tigris)	No	No
		Gekko japonicus				Schlegel's Japanese gecko (Gekko japonicus)	No	No
		Lacerta agilis				Sand lizard (Lacerta agilis)	No	No
		Notechis scutatus				Tiger snake (Notechis scutatus)	No	No
		Pantherophis guttatus				Corn snake (Pantherophis guttatus)	No	No
		Podarcis muralis				Common wall lizard (Podarcis muralis)	No	No
		Pogona vitticeps				Central bearded dragon (Pogona vitticeps)	No	No
		Protobothrops mucrosquamatus				Brown-spotted pit viper (Protobothrops mucrosquamatus)	No	No
		Pseudonaja textilis				Eastern brown snake (Pseudonaja textilis)	No	No
		Python bivittatus				Burmese python (Python bivittatus)	No	No
		Sceloporus undulatus				Eastern fence lizard (Scleroporus undulatus)	No	No
		Sphaerodactylus townsendi				Townsend's least gecko (Sphaerodactylus townsendi)	No	No
		Thamnophis elegans				Western terrestrial garter snake (Thamnophis elegans)	No	No
		Thamnophis sirtalis				Common garter snake (Thamnophis sirtalis)	No	No
		Varanus komodoensis				Komodo dragon (Varanus komodoensis)	No	No
		Zootoca vivipara				Common lizard (Zootoca vivipara)	No	No
