# Supplementary material for: Evolutionary and functional analyses reveal a role for the RHIM in tuning RIPK3 activity across vertebrates
Source: eLife. 2025 May 28;13:RP102301. doi: 10.7554/eLife.102301 (PMC12119088; doi:10.7554/eLife.102301)
Supplement: Supplementary file 8. [file elife-102301-supp8.xlsx]

## Sheet: Sheet1
RIPK3						RIPK1
Changes	Variant	# of species	Classification(s)			Changes	Variant	# of species	Classification(s)
Single residue	CQIG	1	Fish			Single residue	IQMG	1	Eulipotyphlan
	LQIG	5	Fish, amphibian				MQIG	2	Fish
	TQIG	1	Lamprey				LQIG	2	Fish
	VQFG	7	Fish, reptile, rodent, bat, eulipotyphlan				FQIG	2	Amphibian
	VQSG	4	Fish, amphibian				IQLG	1	Lagomorph
	IQYG	3	Fish				IQFG	5	Marsupial, rodent
	VQCG	1	Fish
	FQIG	2	Amphibian
	VQLG	2	Fish
	IQFG	1	Bat
	IQLG	5	Ungulate, bat
	LQVG	4	Rodent, fish,
Two residues	CQFG	1	Amphibian
	FQRG	1	Fish
	FQNG	3	Fish
	FQCG	1	Fish
	FQKG	1	Fish
	LQSG	2	Fish
	LQLG	9	Fish
	FQLG	1	Fish
	LQTG	1	Fish
	FQSG	7	Fish
	AQFG	2	Fish
	FQHG	8	Fish
	LQQG	3	Fish
	LQHG	4	Fish
	FQYG	4	Fish
	FQQG	5	Fish
	LQCG	1	Fish
	LQFG	13	Fish
	LQYG	6	Fish
