# Supplementary material for: Evolutionary and functional analyses reveal a role for the RHIM in tuning RIPK3 activity across vertebrates
Source: eLife. 2025 May 28;13:RP102301. doi: 10.7554/eLife.102301 (PMC12119088; doi:10.7554/eLife.102301)
Supplement: Supplementary file 9. [file elife-102301-supp9.xlsx]

## Sheet: Sheet1
Type	Target	Directionality	Name	Sequence	Notes
Primer	human RIPK1	Forward (F)	EJF129-V5-RIPK1-F	cgattctacgggactcgagggaATGCAACCAGACATGTCCTTGAATGTC	Forward primer for amplifying target with overhang for cloning into V5-pcDNA5/FRT/TO via Gibson cloning
Primer	human RIPK1	Reverse (R)	EJF130-RIPK1-097-NotI-R	tggttaattaataccggtgcggccgcTTAGTTCTGGCTGACGTAAATCAAGCTG	Reverse primer for amplifying target with overhang for cloning into pcDNA5/FRT/TO via Gibson cloning
Primer	human RIPK2	F	EJF133-V5-RIPK2-F	cgattctacgggactcgagggaATGAACGGGGAGGCCATCTG	Forward primer for amplifying target with overhang for cloning into V5-pcDNA5/FRT/TO via Gibson cloning
Primer	human RIPK2	R	EJF134-V5-RIPK2-097-NotI-R	tggttaattaataccggtgcggccgcttaGTACATGCTTTTATTTTGAAGTAAATTTAAAGATGGTGATC	Reverse primer for amplifying target with overhang for cloning into pcDNA5/FRT/TO via Gibson cloning
Primer	human RIPK4	F	EJF137-V5-RIPK4-F	cgattctacgggactcgagggaATGGAGGGCGACGGCGGG	Forward primer for amplifying target with overhang for cloning into V5-pcDNA5/FRT/TO via Gibson cloning
Primer	human RIPK4	R	EJF138-RIPK4-097-NotI-R	tggttaattaataccggtgcggccgcTTAGGTCTTGCTTCGCCGCAG	Reverse primer for amplifying target with overhang for cloning into pcDNA5/FRT/TO via Gibson cloning
Primer	human RIPK5	F	EJF139-V5-RIPK5-F	cgattctacgggactcgagggaATGGCTGCCGACCCCACC	Forward primer for amplifying target with overhang for cloning into V5-pcDNA5/FRT/TO via Gibson cloning
Primer	human RIPK5	R	EJF140-RIPK5-097-NotI-R	tggttaattaataccggtgcggccgcTTAAATTTCCATCTCGGCTCCTGGC	Reverse primer for amplifying target with overhang for cloning into pcDNA5/FRT/TO via Gibson cloning
Primer	mouse RIPK3	F	EJF188-AR097-V5-mRIPK3-gib-F	cggtctcgattctacgggactcgagggaATGTCTTCTGTCAAGTTATGGCCTACTGG	Forward primer for amplifying target with overhang for cloning into V5-pcDNA5/FRT/TO via Gibson cloning
Primer	mouse RIPK3	R	EJF189-AR097-mRIPK3-gib-R	tggttaattaataccggtgcggccgcttaCTTGTGGAAGGGCTGCCAGC	Reverse primer for amplifying target with overhang for cloning into pcDNA5/FRT/TO via Gibson cloning
Primer	human RIPK1	R	EJF190-RIPK1-RHIM-mut-frag1-R	GCTGCAGCCGCAGCGCCAGTACTATTGTATATGG	Forward primer for generating RHIM mutant protein via Gibson cloning
Primer	human RIPK1	F	EJF191-RIPK1-RHIM-mut-frag2-F	tggcgctgcggctgcAGCCTACAATTATATGGAGATTGGTGG	Reverse primer for generating RHIM mutant protein via Gibson cloning
Primer	human RIPK3	F	EJF193-AR097-V5-RIPK3-F	cggtctcgattctacgggactcgagggaATGTCGTGCGTCAAGTTATGGC	Forward primer for amplifying target with overhang for cloning into V5-pcDNA5/FRT/TO via Gibson cloning
Primer	human RIPK3	R	EJF136-RIPK3-097-NotI-R	tggttaattaataccggtgcggccgcCTATTTCCCGCTATGATTATACCAACCCTGTG	Reverse primer for amplifying target with overhang for cloning into pcDNA5/FRT/TO via Gibson cloning
Primer	human RIPK3	R	EJF121-AR097-RIPK3-D142N-cat-mut-R1	GTTCCGGTGCAGGAGCACC	Reverse primer for generating kinase mutant protein via Gibson cloning
Primer	human RIPK3	F	EJF122-AR097-RIPK3-D142N-cat-mut-F2	ccggtgctcctgcaccggAACCTCAAGCCATCCAACGTCC	Forward primer for generating kinase mutant protein via Gibson cloning
Primer	human RIPK3	R	EJF194-RIPK3-RHIM-mut-R1	tgtctgcagctgccgCCCCAGAGCAGTTGTATATGTTAACGAGC	Forward primer for generating RHIM mutant protein via Gibson cloning
Primer	human RIPK3	F	EJF195-RIPK3-RHIM-mut-F2	tggggcggcagctgcAGACAACAACTACTTGACTATGCAACAGAC	Reverse primer for generating RHIM mutant protein via Gibson cloning
Primer	human RIPK2	R	EJF196-RIPK2-kinase-mut-R1	ctgagtcttcaagttATGATGAAGTAAAGGAGGAGTCATATTGTGC	Reverse primer for generating kinase mutant protein via Gibson cloning
Primer	human RIPK2	F	EJF197-RIPK2-kinase-mut-F2	ctttacttcatcataACTTGAAGACTCAGAATATCTTATTGG	Forward primer for generating kinase mutant protein via Gibson cloning
Primer	human RIPK4	R	EJF198-RIPK4-kinase-mut-R1	cgcgggcttgaggttCAGGTGCAGGAGTGGCGG	Reverse primer for generating kinase mutant protein via Gibson cloning
Primer	human RIPK4	F	EJF199-RIPK4-kinase-mut-F2	cactcctgcacctgaACCTCAAGCCCGCGAACATC	Forward primer for generating kinase mutant protein via Gibson cloning
Primer	human RIPK5	R	EJF200-RIPK5-kinase-mut-R1	gcccggcttgaggttCAGGTGGAGCAGAGGCGG	Reverse primer for generating kinase mutant protein via Gibson cloning
Primer	human RIPK5	F	EJF201-RIPK5-kinase-mut-F2	ctctgctccacctgaACCTCAAGCCGGGCAACATAC	Forward primer for generating kinase mutant protein via Gibson cloning
Primer	human RIPK1	R	EJF115-AR097-RIPK1-kinase-dead-R1	GTTCTTGTGTATCACGCCTTTTCCATG	Reverse primer for generating kinase mutant protein via Gibson cloning
Primer	human RIPK1	F	EJF116-AR097-RIPK1-kinase-dead-F2	ggcgtgatacacaagAACCTGAAGCCTGAAAATATCCTTGTTG	Forward primer for generating kinase mutant protein via Gibson cloning
Primer	anolis RIPK3	F	EJF224-097-V5-anolis-RIPK3-F	cgattctacgggactcgagggaATGGCGGCATGCAACGAATTC	Forward primer for amplifying target with overhang for cloning into V5-pcDNA5/FRT/TO via Gibson cloning
Primer	anolis RIPK3	R	EJF225-097-V5-anolis-RIPK3-R	tggttaattaataccggtgcggccgcTTATTGCTTCTTCCCGGGCGTC	Reverse primer for amplifying target with overhang for cloning into pcDNA5/FRT/TO via Gibson cloning
Primer	cat RIPK3	F	EJF226-097-V5-cat-RIPK3-F	cgattctacgggactcgagggaATGTCAGACGTGGGCATAAAGC	Forward primer for amplifying target with overhang for cloning into V5-pcDNA5/FRT/TO via Gibson cloning
Primer	cat RIPK3	R	EJF227-097-V5-cat-RIPK3-R	tggttaattaataccggtgcggccgcTTATTTGTGTGGCGCTCGTTGC	Reverse primer for amplifying target with overhang for cloning into pcDNA5/FRT/TO via Gibson cloning
Primer	chelonia RIPK3	F	EJF228-097-V5-chenolia-RIPK3-F	cgattctacgggactcgagggaATGGCTGAGTGGGTTGAATTTCGAG	Forward primer for amplifying target with overhang for cloning into V5-pcDNA5/FRT/TO via Gibson cloning
Primer	chelonia RIPK3	R	EJF229-097-V5-chenolia-RIPK3-R	tggttaattaataccggtgcggccgcTTACTTTTTCCGTCGTTTTTCCACTTGTAC	Reverse primer for amplifying target with overhang for cloning into pcDNA5/FRT/TO via Gibson cloning
Primer	lamprey RIPK3	F	EJF230-097-V5-lamprey-RIPK3-F	cgattctacgggactcgagggaATGGCTGTGTCCGGTGCTTC	Forward primer for amplifying target with overhang for cloning into V5-pcDNA5/FRT/TO via Gibson cloning
Primer	lamprey RIPK3	R	EJF231-097-V5-lamprey-RIPK3-R	tggttaattaataccggtgcggccgcTTAAGTGTCCTGTTTACTGTACGTATCATCTCG	Reverse primer for amplifying target with overhang for cloning into pcDNA5/FRT/TO via Gibson cloning
Primer	pig RIPK3	F	EJF232-097-V5-pig-RIPK3-F	cgattctacgggactcgagggaATGAGCGGCGTAAAGTTGTGG	Forward primer for amplifying target with overhang for cloning into V5-pcDNA5/FRT/TO via Gibson cloning
Primer	pig RIPK3	R	EJF233-097-V5-pig-RIPK3-R	tggttaattaataccggtgcggccgcTTACTTATGTTGGGGTCCTTTCTTCATTCCC	Reverse primer for amplifying target with overhang for cloning into pcDNA5/FRT/TO via Gibson cloning
Primer	anolis RIPK1	F	EJF234-097-V5-anolis-RIPK1-Cterm-F	cgattctacgggactcgagggaATGCAGGAGAACTATGAGAAGTACGTAGAG	Forward primer for amplifying target with overhang for cloning into V5-pcDNA5/FRT/TO via Gibson cloning
Primer	anolis RIPK1	R	EJF235-097-V5-anolis-RIPK1-Cterm-R	tggttaattaataccggtgcggccgcTTATTTCTTATTCATTTTTGACTCTTTATTGATC	Reverse primer for amplifying target with overhang for cloning into pcDNA5/FRT/TO via Gibson cloning
Primer	cat RIPK1	F	EJF236-097-V5-cat-RIPK1-Cterm-F	cgattctacgggactcgagggaATGGTCGATCAGCTGGAGGAGAAC	Forward primer for amplifying target with overhang for cloning into V5-pcDNA5/FRT/TO via Gibson cloning
Primer	cat RIPK1	R	EJF237-097-V5-cat-RIPK1-Cterm-R	tggttaattaataccggtgcggccgcTTAGCTTTGGCTTATGTGTATAAGATAGTTCAGC	Reverse primer for amplifying target with overhang for cloning into pcDNA5/FRT/TO via Gibson cloning
Primer	chicken RIPK1	F	EJF238-097-V5-chicken-RIPK1-Cterm-F	cgattctacgggactcgagggaATGCAAAATCTTGAGAAAAACATCGAAGACG	Forward primer for amplifying target with overhang for cloning into V5-pcDNA5/FRT/TO via Gibson cloning
Primer	chicken RIPK1	R	EJF239-097-V5-chicken-RIPK1-Cterm-R	tggttaattaataccggtgcggccgcTTACTCTTCTGACATTTGCATCAAAGATGTGAG	Reverse primer for amplifying target with overhang for cloning into pcDNA5/FRT/TO via Gibson cloning
Primer	lamprey RIPK1	F	EJF240-097-V5-lamprey-RIPK1-Cterm-F	cgattctacgggactcgagggaATGAATAGCTATGAAGAGGAAATCCCTGC	Forward primer for amplifying target with overhang for cloning into V5-pcDNA5/FRT/TO via Gibson cloning
Primer	lamprey RIPK1	R	EJF241-097-V5-lamprey-RIPK1-Cterm-R	tggttaattaataccggtgcggccgcTTAAGTTGAGTTCTCGTCGAGCTCCTG	Reverse primer for amplifying target with overhang for cloning into pcDNA5/FRT/TO via Gibson cloning
Primer	pig RIPK1	F	EJF242-097-V5-pig-RIPK1-Cterm-F	cgattctacgggactcgagggaATGAGCCAACTGGAGGGGAATG	Forward primer for amplifying target with overhang for cloning into V5-pcDNA5/FRT/TO via Gibson cloning
Primer	pig RIPK1	R	EJF243-097-V5-pig-RIPK1-Cterm-R	tggttaattaataccggtgcggccgcTTAATTCTGACTTGACCGTATCAAGCATGAC	Reverse primer for amplifying target with overhang for cloning into pcDNA5/FRT/TO via Gibson cloning
Primer	zebra mussel RIPK1	F	EJF244-097-V5-mussel-RIPK1-Cterm-F	cgattctacgggactcgagggaATGAACCAGTTGTATTGTGAAAGCTATGAACC	Forward primer for amplifying target with overhang for cloning into V5-pcDNA5/FRT/TO via Gibson cloning
Primer	zebra mussel RIPK1	R	EJF245-097-V5-mussel-RIPK1-Cterm-R	tggttaattaataccggtgcggccgcTTATTTCAACTGCTGTGCGAGATCATCC	Reverse primer for amplifying target with overhang for cloning into pcDNA5/FRT/TO via Gibson cloning
Primer	human TRIF	F	EJF258-097-V5-TRIF-F	cgattctacgggactcgagggaATGGCCTGCACAGGCC	Forward primer for amplifying target with overhang for cloning into V5-pcDNA5/FRT/TO via Gibson cloning
Primer	human TRIF	R	EJF259-097-V5-TRIF-R	tggttaattaataccggtgcggccgcTTATTCTGCCTCCTGCGTCTTGTCC	Reverse primer for amplifying target with overhang for cloning into pcDNA5/FRT/TO via Gibson cloning
Primer	human TRIF	R	EJF264-TRIF-RHIM-mut-frag1-R	tcagcgctgccgctgCCATCTGTGCGTGGTGGATAATGAG	Forward primer for generating RHIM mutant protein via Gibson cloning
Primer	human TRIF	F	EJF265-TRIF-RHIM-mut-frag2-F	gatggcagcggcagcGCTGAACAACCACATGTGGAACC	Reverse primer for generating RHIM mutant protein via Gibson cloning
Primer	human ZBP1	R	EJF266-ZBP1-RHIM1-mut-frag1-R	gtgtgcagccgcggcGGCTTCGGAGTTTGCAATGGAAATCC	Forward primer for generating RHIM mutant protein via Gibson cloning
Primer	human ZBP1	F	EJF267-ZBP1-RHIM1-mut-frag2-F	agccgccgcggctgcACACGGGAACATCATTACAAGACAGAC	Reverse primer for generating RHIM mutant protein via Gibson cloning
Primer	human ZBP1	R	EJF268-ZBP1-RHIM2-mut-frag1-R	tgtgtgcagccgctgCCCGTCTCAGTATGGACCGC	Forward primer for generating RHIM mutant protein via Gibson cloning
Primer	human ZBP1	F	EJF269-ZBP1-RHIM2-mut-frag2-F	acgggcagcggctgcACACAGCAATGAGATGAGGCTCCAC	Reverse primer for generating RHIM mutant protein via Gibson cloning
Primer	anolis RIPK1	R	EJF270-anolis-RIPK1-RHIM-mut-frag1-R	attcgcggccgctgcTCCGGTAGAGTTAAAGATGTTGAATCGAGG	Forward primer for generating RHIM mutant protein via Gibson cloning
Primer	anolis RIPK1	F	EJF271-anolis-RIPK1-RHIM-mut-frag2-F	gcagcggccgcGAATTACAACCATCTTGAGATTAAAGACCCTAGCTTG	Reverse primer for generating RHIM mutant protein via Gibson cloning
Primer	cat RIPK1	R	EJF272-cat-RIPK1-RHIM-mut-frag1-R	atctgctgctgctgcCCCTGCGGAATTGTAGATATTACATTTGATGC	Forward primer for generating RHIM mutant protein via Gibson cloning
Primer	cat RIPK1	F	EJF273-cat-RIPK1-RHIM-mut-frag2-F	ggggcagcagcagcaGATCACAATTACATGGAAATTGGGGGC	Reverse primer for generating RHIM mutant protein via Gibson cloning
Primer	lamprey RIPK1	R	EJF274-lamprey-RIPK1-RHIM-mut-frag1-R	gttggctgctgcagcGTTCTCACCGTGAGAAATATGTACTTTGAAGC	Forward primer for generating RHIM mutant protein via Gibson cloning
Primer	lamprey RIPK1	F	EJF275-lamprey-RIPK1-RHIM-mut-frag2-F	gaacgctgcagcagcCAACAACAACGTCATCAATCTCAACTCAAAAAG	Reverse primer for generating RHIM mutant protein via Gibson cloning
Primer	pig RIPK1	R	EJF276-pig-RIPK1-RHIM-mut-frag1-R	ggtctgcggctgctgCGCCGGAGTTGCCGTACAAG	Forward primer for generating RHIM mutant protein via Gibson cloning
Primer	pig RIPK1	F	EJF277-pig-RIPK1-RHIM-mut-frag2-F	ggcgcagcagccgcaGACCATAACTACATGGAACTTGGAGGC	Reverse primer for generating RHIM mutant protein via Gibson cloning
Primer	zebra mussel RIPK1	R	EJF278-mussel-RIPK1-RHIM-mut-frag1-R	atttgcagctgcagcGTTCGGCGGGACTATTGAGTTGG	Forward primer for generating RHIM mutant protein via Gibson cloning
Primer	zebra mussel RIPK1	F	EJF279-mussel-RIPK1-RHIM-mut-frag2-F	acgctgcagctgcaaATAACAATAAGATGGTAATCAACGATAACGGCG	Reverse primer for generating RHIM mutant protein via Gibson cloning
Primer	anolis RIPK3	R	EJF280-anolis-RIPK3-RHIM-mut-frag1-R	atttgcagccgcggcACCAGAGACATTGTAACCTGAGAAATGGAC	Forward primer for generating RHIM mutant protein via Gibson cloning
Primer	anolis RIPK3	F	EJF281-anolis-RIPK3-RHIM-mut-frag2-F	tggtgccgcggctgcAAATAACAACACGATGCATTTCGAGTGG	Reverse primer for generating RHIM mutant protein via Gibson cloning
Primer	cat RIPK3	R	EJF282-cat-RIPK3-RHIM-mut-frag1-R	tgtcggctgccgccgCAGCGTGGCTGTCGCTTATTATCAC	Forward primer for generating RHIM mutant protein via Gibson cloning
Primer	cat RIPK3	F	EJF283-cat-RIPK3-RHIM-mut-frag2-F	cgctgcggcggcagcCGACAATAACTATCTCATTATACAAGGGGGCAC	Reverse primer for generating RHIM mutant protein via Gibson cloning
Primer	chelonia RIPK3	R	EJF284-chelonia-RIPK3-RHIM-mut-frag1-R	atgggcagctgctgcACCACTGCACGGCCCTACAATATG	Forward primer for generating RHIM mutant protein via Gibson cloning
Primer	chelonia RIPK3	F	EJF285-chelonia-RIPK3-RHIM-mut-frag2-F	tggtgcagcagctgcCCATAATAACAGTATGAAAGTAACTAAAGTAC	Reverse primer for generating RHIM mutant protein via Gibson cloning
Primer	lamprey RIPK3	R	EJF286-lamprey-RIPK3-T544I-frag1-R	tgttgccaatttggaTGTTCTTCAAGTTGGAGCCGACAATAG	Forward primer for generating RHIM mutant protein via Gibson cloning
Primer	lamprey RIPK3	F	EJF287-lamprey-RIPK3-T544I-frag2-F	caacttgaagaacatCCAAATTGGCAACAACAACACGATCTAC	Reverse primer for generating RHIM mutant protein via Gibson cloning
Primer	human RIPK1	F	EJF292-097-V5-RIPK1-Cterm-full-F	cgattctacgggactcgagggaTTAAGTCAATTAGAAGAAAGTGTAGAAGAGGACG	Forward primer for amplifying target with overhang for cloning into pcDNA5/FRT/TO via Gibson cloning
Primer	mouse RIPK1	R	EJF294-097-V5-mouse-RIPK1-R	tggttaattaataccggtgcggccgcTTAGCTCTGGCTGGCACGAATCAAG	Reverse primer for amplifying target with overhang for cloning into pcDNA5/FRT/TO via Gibson cloning
Primer	mouse RIPK1	R	EJF295-mouse-RIPK1-RHIM-mut-frag1-R	gtttgcagccgcagcACCAGAACTATTGAATATAGTATATTTTATGAGG	Forward primer for generating RHIM mutant protein via Gibson cloning
Primer	mouse RIPK1	F	EJF296-mouse-RIPK1-RHIM-mut-frag2-F	tggtgctgcggctgcAAACCACAATTATATGGATGTTGGACTGAATTC	Reverse primer for generating RHIM mutant protein via Gibson cloning
Primer	mouse RIPK1	F	EJF297-097-V5-mouse-RIPK1-Cterm-F	cgattctacgggactcgagggaATGAGTCATTTTGAAGAATATGTAGAAGAGG	Forward primer for amplifying target with overhang for cloning into pcDNA5/FRT/TO via Gibson cloning
Primer	human RIPK3	R	EJF304-RIPK3-CQIG-R1	gtctccaatttggcaCCCAGAGCAGTTGTATATGTTAACGAG	Reverse primer for generating RHIM variant in human RIPK3 via Gibson cloning
Primer	human RIPK3	F	EJF305-RIPK3-CQIG-F2	gctctgggtgccaaaTTGGAGACAACAACTACTTGACTATGC	Forward primer for generating RHIM variant in human RIPK3 via Gibson cloning
Primer	human RIPK3	R	EJF306-RIPK3-LQIG-R1	gtctccaatttgcagCCCAGAGCAGTTGTATATGTTAACGAG	Reverse primer for generating RHIM variant in human RIPK3 via Gibson cloning
Primer	human RIPK3	F	EJF307-RIPK3-LQIG-F2	gctctgggctgcaaaTTGGAGACAACAACTACTTGACTATGC	Forward primer for generating RHIM variant in human RIPK3 via Gibson cloning
Primer	human RIPK3	R	EJF308-RIPK3-TQIG-R1	gtctccaatttgcgtCCCAGAGCAGTTGTATATGTTAACGAG	Reverse primer for generating RHIM variant in human RIPK3 via Gibson cloning
Primer	human RIPK3	F	EJF309-RIPK3-TQIG-F2	gctctgggacgcaaaTTGGAGACAACAACTACTTGACTATGC	Forward primer for generating RHIM variant in human RIPK3 via Gibson cloning
Primer	human RIPK3	R	EJF310-RIPK3-VQFG-R1	gttgttgtctccaaaTTGCACCCCAGAGCAGTTGTATATG	Reverse primer for generating RHIM variant in human RIPK3 via Gibson cloning
Primer	human RIPK3	F	EJF311-RIPK3-VQFG-F2	gctctggggtgcaatTTGGAGACAACAACTACTTGACTATGC	Forward primer for generating RHIM variant in human RIPK3 via Gibson cloning
Primer	human RIPK3	R	EJF312-RIPK3-VQSG-R1	gttgttgtctccagaTTGCACCCCAGAGCAGTTGTATATG	Reverse primer for generating RHIM variant in human RIPK3 via Gibson cloning
Primer	human RIPK3	F	EJF313-RIPK3-VQSG-F2	ctctggggtgcaatcTGGAGACAACAACTACTTGACTATGC	Forward primer for generating RHIM variant in human RIPK3 via Gibson cloning
Primer	anolis RIPK3	R	EJF317-V5-anolis-RIPK3-kin-mut-R1	tccgagcttcagattCAGGTGGAGCAAAGGGGGTG	Reverse primer for generating kinase mutant protein via Gibson cloning
Primer	anolis RIPK3	F	EJF318-V5-anolis-RIPK3-kin-mut-F2	ctttgctccacctgaATCTGAAGCTCGGAAATATCCTGCTG	Forward primer for generating kinase mutant protein via Gibson cloning
Primer	chelonia RIPK3	R	EJF319-V5-chelonia-RIPK3-kin-mut-R1	ggatggtttcaagttCAAGTGAAGCAGGGGAGGGTG	Reverse primer for generating kinase mutant protein via Gibson cloning
Primer	chelonia RIPK3	F	EJF320-V5-chelonia-RIPK3-kin-mut-F2	ccctgcttcacttgaACTTGAAACCATCCAACGTACTGCTC	Forward primer for generating kinase mutant protein via Gibson cloning
Primer	human ZBP1	F	EJF045-pDL2118-ZBP1-F	ccggactctagcgtttaaacATGGCCCAGGCTCCTGC	Forward primer for amplifying target with overhang for cloning into pcDNA5/FRT/TO via Gibson cloning
Primer	human ZBP1	R	EJF046-pDL2118-ZBP1-R	tggttaattaataccggtgcCTAAATCCCACCTCCCCACCAGC	Reverse primer for amplifying target with overhang for cloning into pcDNA5/FRT/TO via Gibson cloning
sgRNA	human RIPK1	F	EJF094-CRISPR-Lenti-RIPK1-KO-gRNA-2-F	GGCACCGCTAAGAAGAATGG(CGG)	Sequence for CRISPR targeting of exon 5 of RIPK1 - PAM sequence noted in parentheses for reference
