# Supplementary figures and images for: Evolutionary and functional analyses reveal a role for the RHIM in tuning RIPK3 activity across vertebrates
Source: eLife journal article supplement (doi:10.7554/elife.102301), 2024-12-09

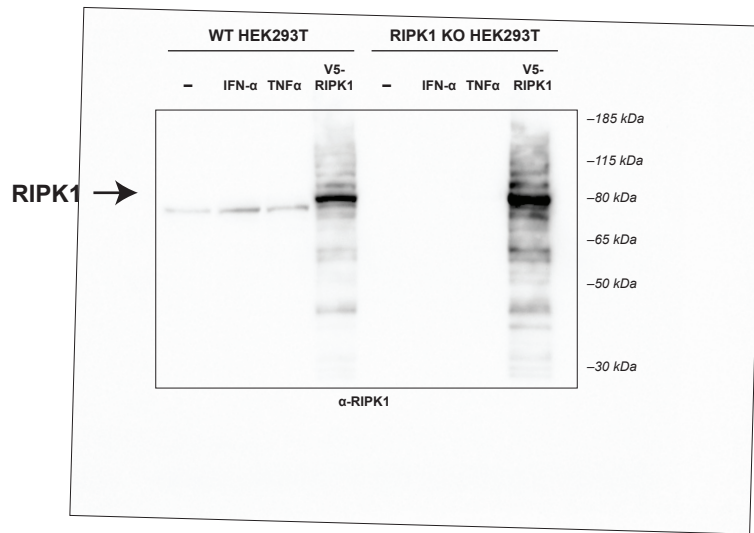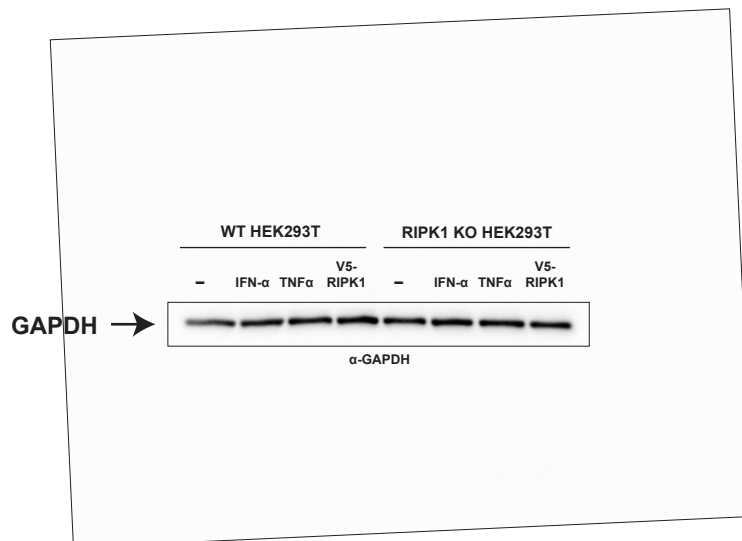

Supplement: fig1-figsupp2-data2 [file elife-102301-fig1-figsupp2-data2-v1.zip]

### WT HEK293T cells

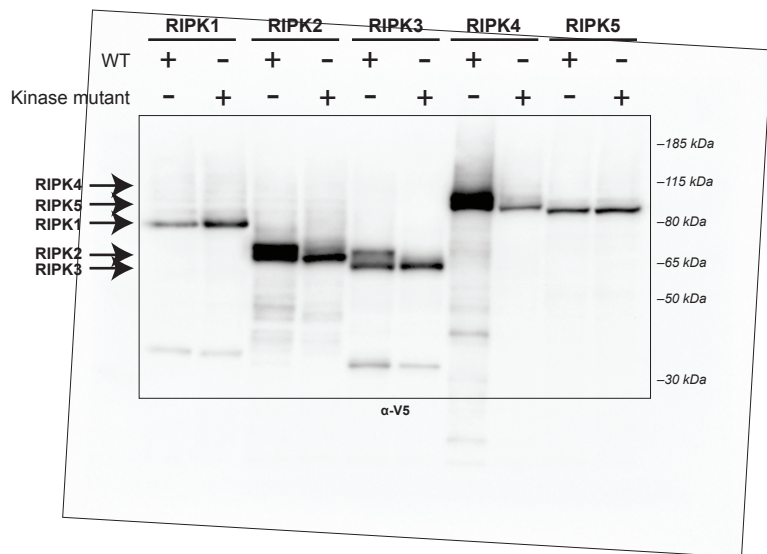

### RIPK1 KO HEK293T cells

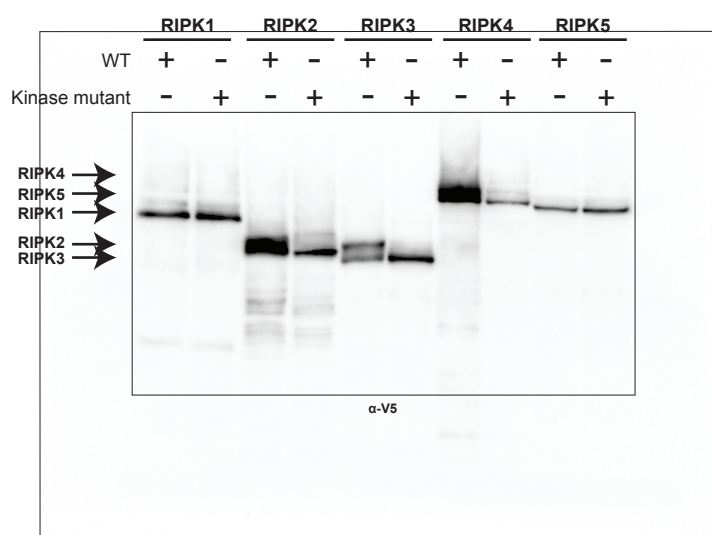

### WT HEK293T cells

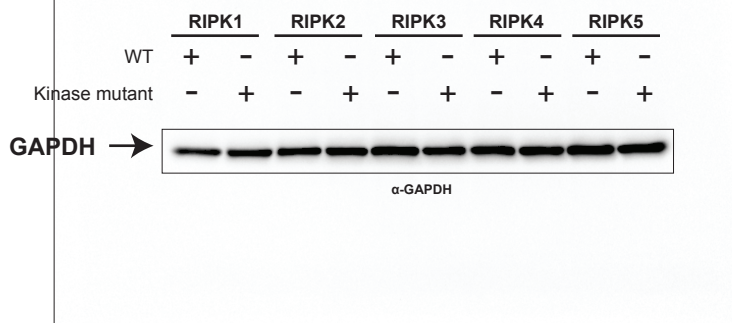

### RIPK1 KO HEK293T cells

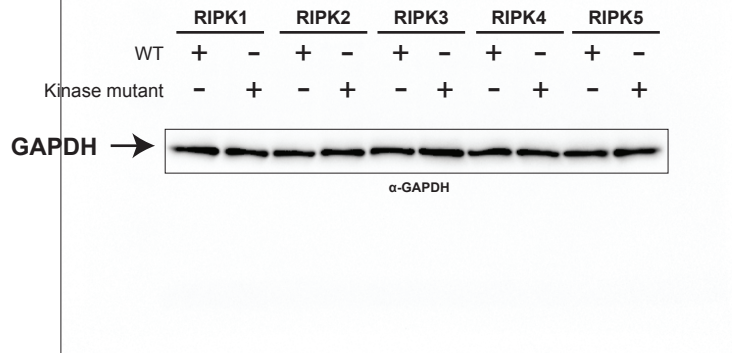

Supplement: fig1-figsupp3-data2 [file elife-102301-fig1-figsupp3-data2-v1.zip]

**RIPK1 KO HEK293T:**

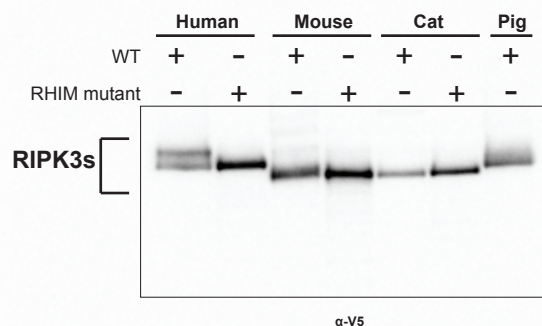

**RIPK1 KO HEK293T:**

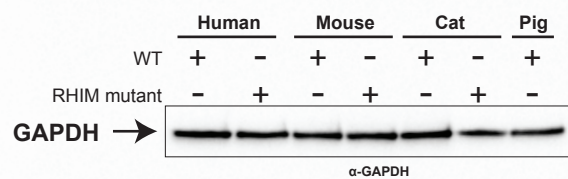

Supplement: fig2-figsupp1-data2 [file elife-102301-fig2-figsupp1-data2-v1.zip]

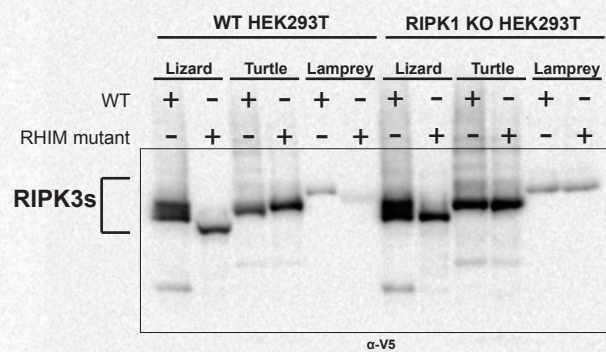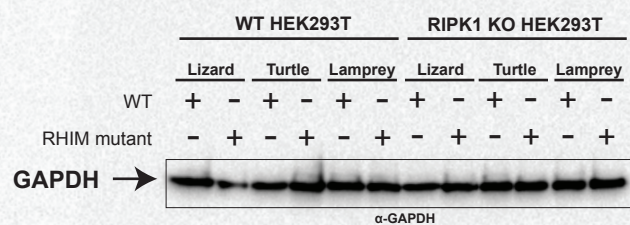

Supplement: fig2-figsupp1-data2 [file elife-102301-fig2-figsupp1-data2-v1.zip]

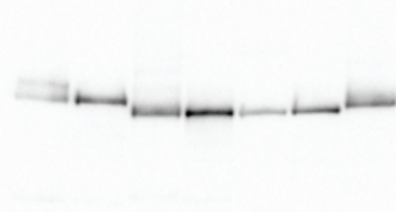

WT HEK293T:

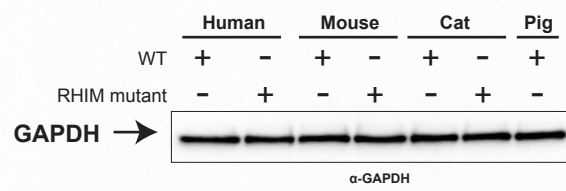

Supplement: fig2-figsupp1-data2 [file elife-102301-fig2-figsupp1-data2-v1.zip]

WT HEK293T:

|             | Human |   | Mouse |   | Cat |   | Pig |
|-------------|-------|---|-------|---|-----|---|-----|
| WT          | +     | - | +     | - | +   | - | +   |
| RHIM mutant | -     | + | -     | + | -   | + | -   |

RIPK3s

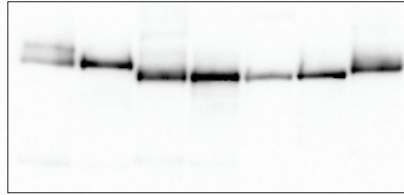

α-V5

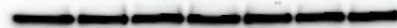

Supplement: fig2-figsupp1-data2 [file elife-102301-fig2-figsupp1-data2-v1.zip]

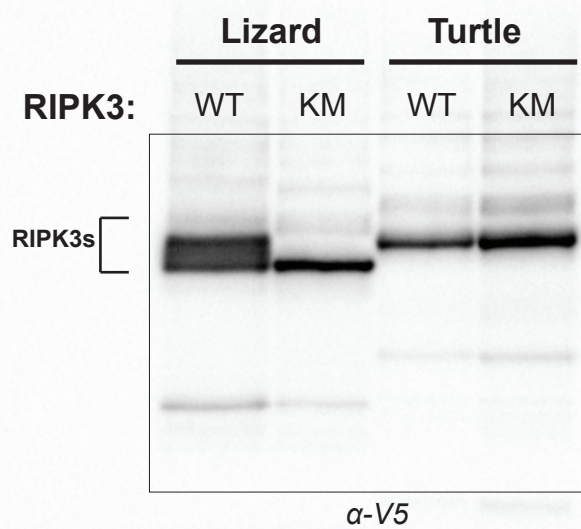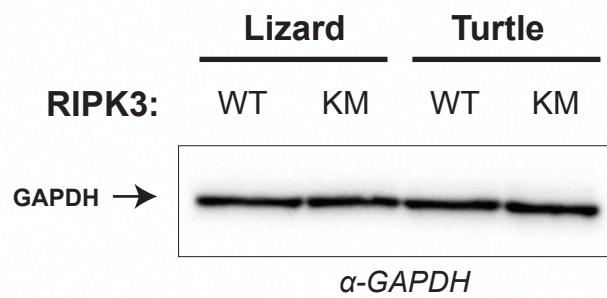

Supplement: fig3-figsupp2-data2 [file elife-102301-fig3-figsupp2-data2-v1.zip]

**RIPK1 KO HEK293T:**

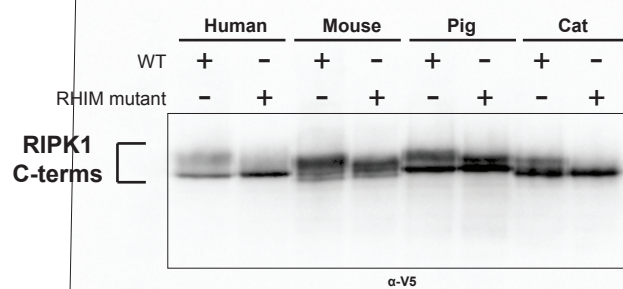

**RIPK1 KO HEK293T:**

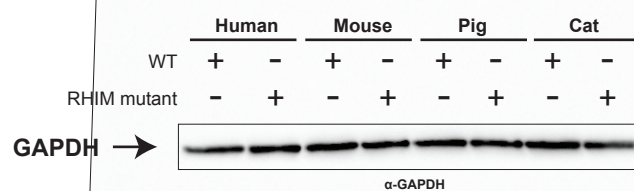

Supplement: fig4-figsupp1-data2 [file elife-102301-fig4-figsupp1-data2-v1.zip]

WT HEK293T:

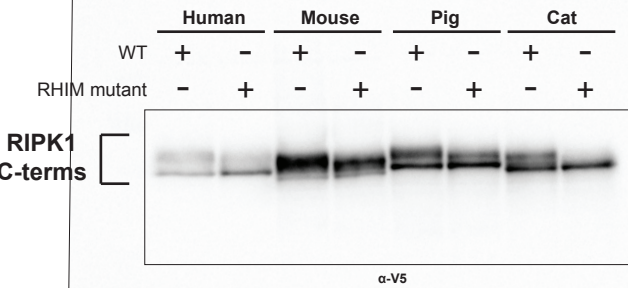

WT HEK293T:

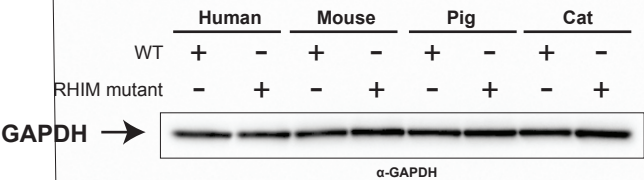

Supplement: fig4-figsupp1-data2 [file elife-102301-fig4-figsupp1-data2-v1.zip]

**RIPK1 KO HEK293T:**

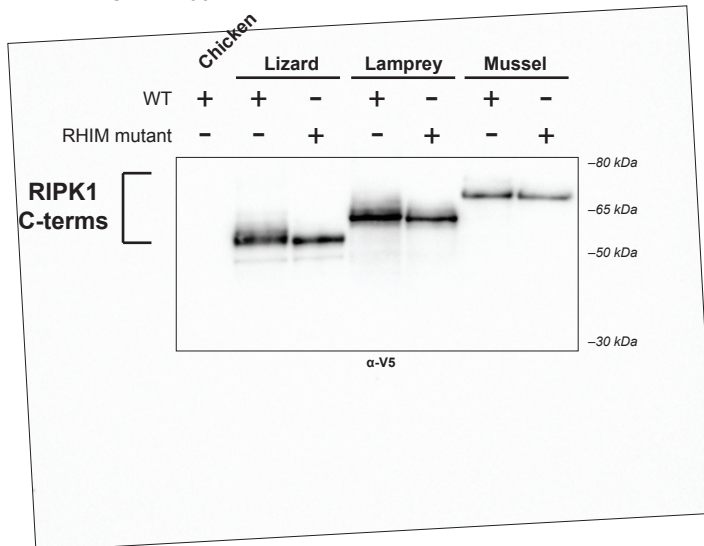

**RIPK1 KO HEK293T:**

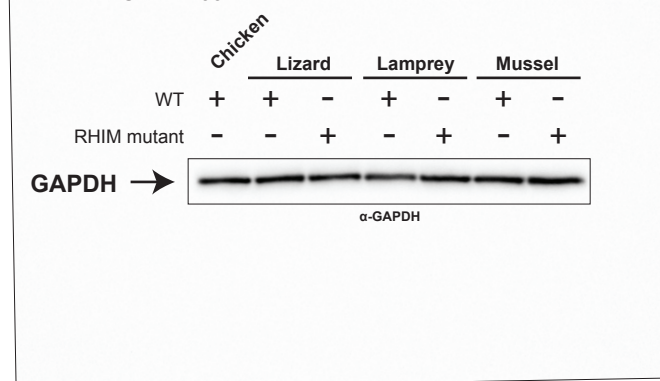

Supplement: fig4-figsupp1-data2 [file elife-102301-fig4-figsupp1-data2-v1.zip]

**WT HEK293T:**

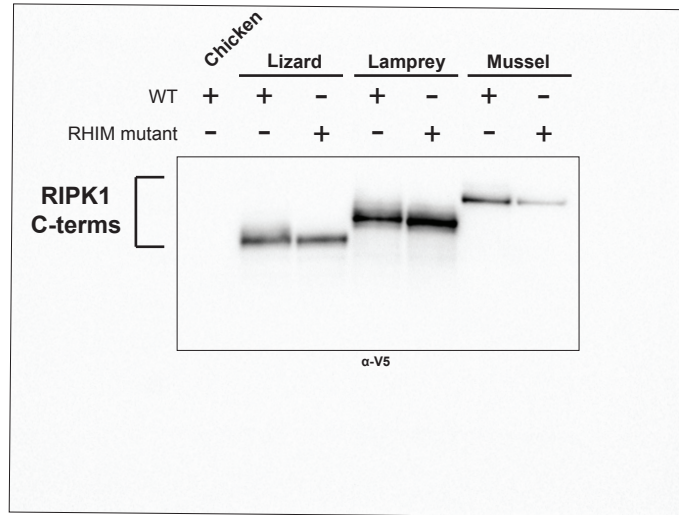

**WT HEK293T:**

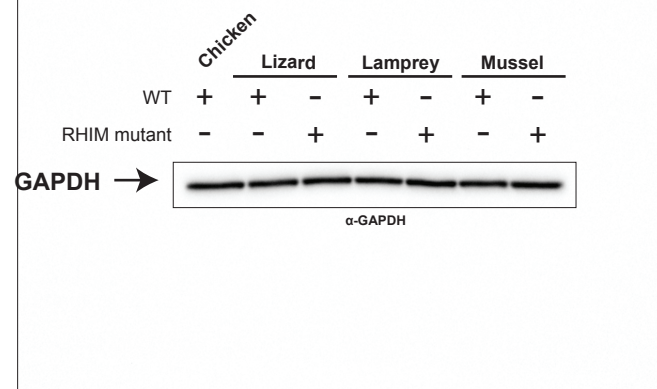

Supplement: fig4-figsupp1-data2 [file elife-102301-fig4-figsupp1-data2-v1.zip]

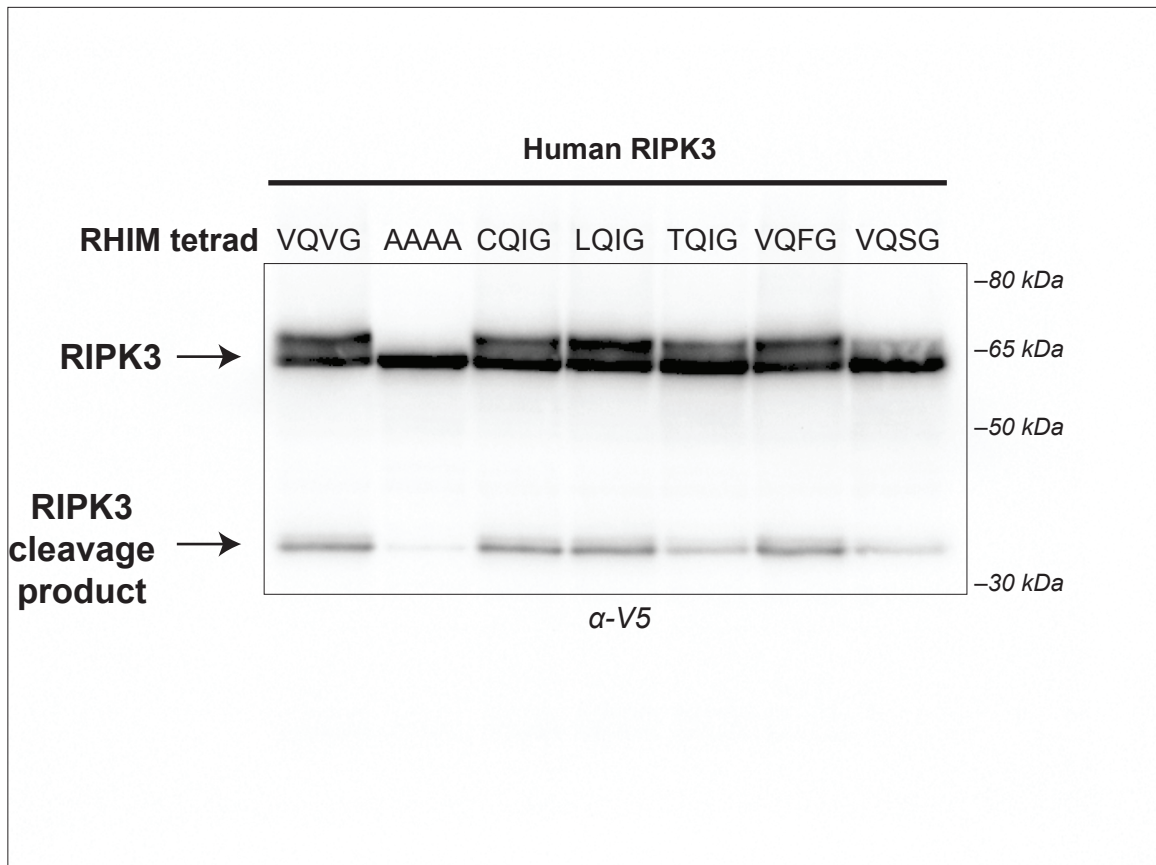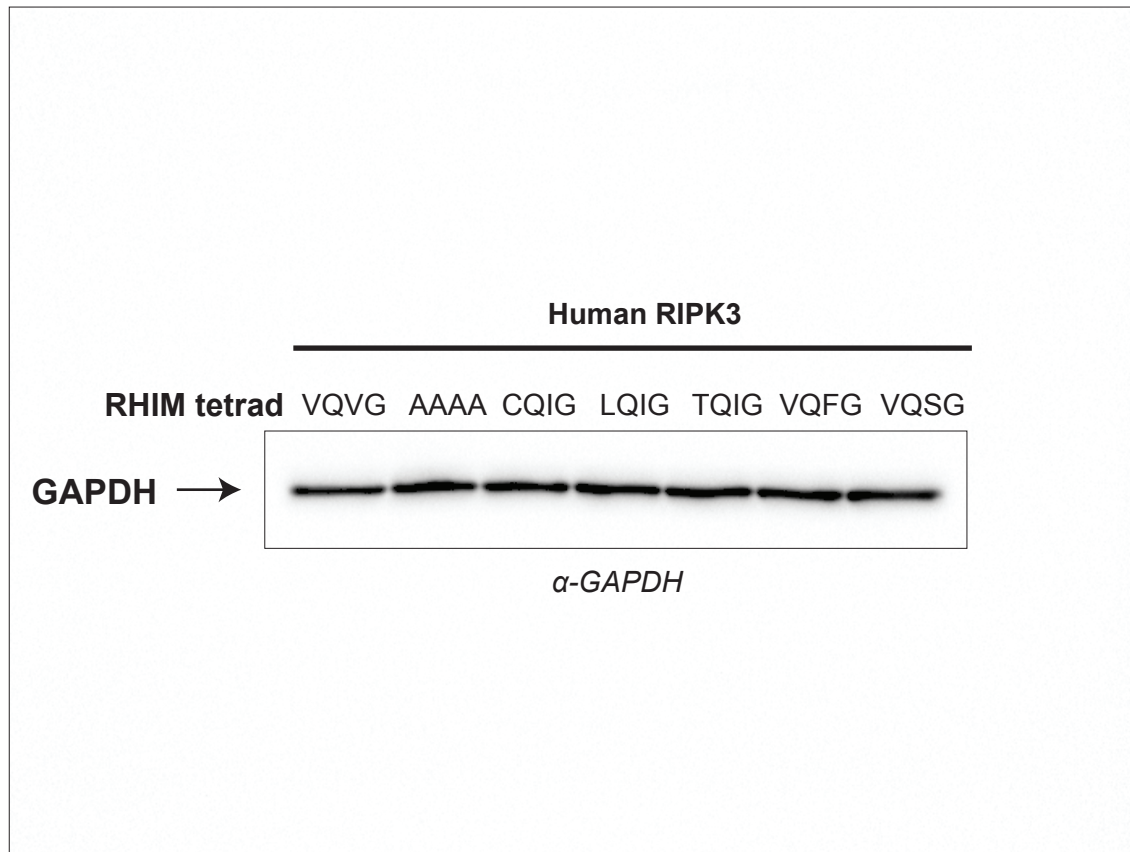

Supplement: fig4-figsupp6-data2 [file elife-102301-fig4-figsupp6-data2-v1.zip]
